# Supplementary material for: Proteogenomic identification of an immunogenic antigen derived from human endogenous retrovirus in renal cell carcinoma
Source: PubMed Central journal article supplement (PMC10543709; doi:10.1172/jci.insight.167712), 2023-08-22
Supplement: jciinsight-8-167712-s127.pdf [file jciinsight-8-167712-s127.pdf]

**Supplementary table 1: HLA-A24 ligands detected in the RCC17 tumor tissue**

| Sequence     | Length | %rank   | Gene   | Ensembl gene ID    | Ensembl protein ID | Expression | ORF Length |
|--------------|--------|---------|--------|--------------------|--------------------|------------|------------|
| QALLDLHAL    | 9      | 8.8193  | FTL    | ENSG00000087086.15 | ENSP00000366525.2  | 7381.9     | 525        |
| VMAPRTVLL    | 9      | 0.4689  | HLA-B  | ENSG00000234745.11 | ENSP00000399168.2  | 5712.5     | 1086       |
| SMRYFYTSV    | 9      | 12.8611 | HLA-B  | ENSG00000234745.11 | ENSP00000399168.2  | 5712.5     | 1086       |
| YAYDGKDYIAL  | 11     | 8.8004  | HLA-B  | ENSG00000234745.11 | ENSP00000399168.2  | 5712.5     | 1086       |
| LMISRTPEV    | 9      | 5.5142  | IGHG1  | ENSG00000211896.7  | ENSP00000374984.2  | 5656.8     | 885        |
| VMAPRTLLL    | 9      | 0.3778  | HLA-A  | ENSG00000206503.13 | ENSP00000366005.5  | 3642.7     | 1095       |
| HYIRKYNRF    | 9      | 0.0164  | RPS11  | ENSG00000142534.7  | ENSP00000270625.1  | 2985.7     | 474        |
| KFIDTTSKF    | 9      | 0.0212  | RPL3   | ENSG00000100316.16 | ENSP00000346001.3  | 2655.3     | 1209       |
| DVIGVTKGK    | 9      | 25.0000 | RPL3   | ENSG00000100316.16 | ENSP00000346001.3  | 2655.3     | 1209       |
| DVIAQGIGKL   | 10     | 28.1250 | RPLP2  | ENSG00000177600.9  | ENSP00000322419.4  | 2005.9     | 345        |
| NYIDKVRFL    | 9      | 0.0729  | VIM    | ENSG00000026025.16 | ENSP00000224237.5  | 2172.4     | 1398       |
| RISLPLPNF    | 9      | 0.8058  | VIM    | ENSG00000026025.16 | ENSP00000224237.5  | 2172.4     | 1398       |
| LYEEMREL     | 9      | 0.5724  | VIM    | ENSG00000026025.16 | ENSP00000224237.5  | 2172.4     | 1398       |
| VYATRSSAVRL  | 11     | 0.4953  | VIM    | ENSG00000026025.16 | ENSP00000224237.5  | 2172.4     | 1398       |
| SYVTTSTRTYSL | 12     | 1.3997  | VIM    | ENSG00000026025.16 | ENSP00000224237.5  | 2172.4     | 1398       |
| LYLKVKGNVF   | 10     | 0.1685  | RPL19  | ENSG00000108298.11 | ENSP00000464538.1  | 2017.5     | 582        |
| AYLPVNESF    | 9      | 0.0029  | EEF2   | ENSG00000167658.16 | ENSP00000307940.5  | 1542.0     | 2574       |
| RYFDPANGKF   | 10     | 0.0144  | EEF2   | ENSG00000167658.16 | ENSP00000307940.5  | 1542.0     | 2574       |
| KYQAVTATL    | 9      | 0.0175  | RPL13A | ENSG00000142541.17 | ENSP00000375730.4  | 2300.2     | 609        |
| SQLRVAKV     | 8      | 21.5455 | RPL35  | ENSG00000136942.15 | ENSP00000259469.4  | 1526.2     | 369        |
| YYTRLGNDF    | 9      | 0.0970  | RPS17  | ENSG00000182774.13 | ENSP00000498019.1  | 1456.7     | 405        |
| YWSHPRKF     | 8      | 0.6397  | RPS29  | ENSG00000213741.10 | ENSP00000245458.6  | 1143.5     | 168        |
| LYWSHPRKF    | 9      | 0.0225  | RPS29  | ENSG00000213741.10 | ENSP00000245458.6  | 1143.5     | 168        |

|              |    |         |          |                    |                   |        |      |
|--------------|----|---------|----------|--------------------|-------------------|--------|------|
| GQFKTYAI     | 8  | 16.6727 | RPS21    | ENSG00000171858.18 | ENSP00000345957.3 | 1415.8 | 249  |
| IYSVFRNAASF  | 11 | 0.2225  | PLIN2    | ENSG00000147872.10 | ENSP00000276914.2 | 1012.4 | 1311 |
| RLPEEWSQW    | 9  | 0.2153  | HSPB1    | ENSG00000106211.9  | ENSP00000248553.6 | 933.4  | 615  |
| EVTRVKAVR    | 9  | 37.6667 | TXNIP    | ENSG00000265972.5  | ENSP00000462521.1 | 932.8  | 1173 |
| HVIGLQMGSNR  | 11 | 44.0000 | TAGLN    | ENSG00000149591.16 | ENSP00000376678.4 | 871.2  | 603  |
| YVHMTHF      | 8  | 0.8009  | TMBIM6   | ENSG00000139644.13 | ENSP00000447030.1 | 809.6  | 600  |
| EHGDQDYIW    | 9  | 2.7597  | TMBIM6   | ENSG00000139644.13 | ENSP00000447030.1 | 809.6  | 600  |
| IYKPGQTVKF   | 10 | 0.0098  | A2M      | ENSG00000175899.14 | ENSP00000323929.7 | 711.7  | 4422 |
| EVIPYTPAM    | 9  | 5.3868  | HMOX1    | ENSG00000100292.17 | ENSP00000216117.8 | 668.3  | 864  |
| EVIPYTPAMQR  | 11 | 30.8333 | HMOX1    | ENSG00000100292.17 | ENSP00000216117.8 | 668.3  | 864  |
| QQSKILKV     | 8  | 18.0526 | HSP90AB1 | ENSG00000096384.20 | ENSP00000360709.5 | 556.4  | 2172 |
| RFVNVVPTF    | 9  | 0.0122  | FAU      | ENSG00000149806.11 | ENSP00000435370.1 | 659.0  | 399  |
| RYESLKGVDPKF | 12 | 0.4209  | RPL29    | ENSG00000162244.11 | ENSP00000294189.4 | 561.2  | 477  |
| YFKRYQVKF    | 9  | 0.0955  | RPL5     | ENSG00000122406.14 | ENSP00000359345.2 | 774.6  | 891  |
| ETIPLTAEK    | 9  | 20.4074 | CCND1    | ENSG00000110092.3  | ENSP00000227507.2 | 489.5  | 885  |
| RYLTVAAVF    | 9  | 0.0167  | TUBB     | ENSG00000196230.13 | ENSP00000339001.7 | 457.8  | 1332 |
| EYPDRIMNTF   | 10 | 0.0274  | TUBB     | ENSG00000196230.13 | ENSP00000339001.7 | 457.8  | 1332 |
| SQVEILQRV    | 9  | 4.4332  | ID3      | ENSG00000117318.9  | ENSP00000363689.5 | 532.8  | 357  |
| RYSSMAASF    | 9  | 0.0077  | PDZK1IP1 | ENSG00000162366.8  | ENSP00000294338.2 | 478.2  | 342  |
| DQYKFLAV     | 8  | 16.1273 | NDUFA4L2 | ENSG00000185633.10 | ENSP00000450664.1 | 646.1  | 261  |
| YWEVQPATF    | 9  | 0.1017  | BGN      | ENSG00000182492.16 | ENSP00000327336.4 | 888.9  | 1104 |
| ELIQDITQR    | 9  | 20.9630 | MSN      | ENSG00000147065.17 | ENSP00000353408.5 | 379.6  | 1731 |
| NVIGLQMGTNR  | 11 | 48.0000 | TAGLN2   | ENSG00000158710.14 | ENSP00000357077.4 | 383.6  | 597  |
| SYMEVPTYL    | 9  | 0.0073  | LAPTM5   | ENSG00000162511.8  | ENSP00000294507.3 | 373.6  | 786  |
| SYIELPAYL    | 9  | 0.0221  | LAPTM5   | ENSG00000162511.8  | ENSP00000294507.3 | 373.6  | 786  |
| QQLTAMKV     | 8  | 32.6000 | MYH9     | ENSG00000100345.21 | ENSP00000216181.5 | 378.3  | 5880 |
| KYLYVDKNF    | 9  | 0.0370  | MYH9     | ENSG00000100345.21 | ENSP00000216181.5 | 378.3  | 5880 |

|              |    |         |          |                    |                   |        |      |
|--------------|----|---------|----------|--------------------|-------------------|--------|------|
| TYISSVYHV    | 9  | 0.0593  | SLC17A3  | ENSG00000124564.17 | ENSP00000355307.6 | 809.5  | 1260 |
| DYVEGLRVF    | 9  | 0.1353  | MYL6     | ENSG00000092841.18 | ENSP00000446955.1 | 991.5  | 453  |
| AYVLNIVRF    | 9  | 0.0134  | ATP1B1   | ENSG00000143153.12 | ENSP00000356789.3 | 439.0  | 909  |
| KYMTAVVKLF   | 10 | 0.0213  | CYBA     | ENSG00000051523.11 | ENSP00000261623.3 | 380.3  | 585  |
| SYTSHTNEI    | 9  | 0.1620  | C7       | ENSG00000112936.18 | ENSP00000322061.9 | 307.9  | 2529 |
| IYRDLISHDEMF | 12 | 0.3038  | TPT1     | ENSG00000133112.16 | ENSP00000431872.1 | 1437.9 | 516  |
| KYTPPPHHI    | 9  | 0.0036  | NDUFS5   | ENSG00000168653.11 | ENSP00000362058.3 | 430.2  | 318  |
| AYVVKVFSL    | 9  | 0.0716  | C3       | ENSG00000125730.16 | ENSP00000245907.4 | 309.6  | 4989 |
| AYKYIQELW    | 9  | 0.0402  | RPL15    | ENSG00000174748.21 | ENSP00000483260.1 | 568.4  | 612  |
| HSYSPRAI     | 8  | 23.0000 | PSMB4    | ENSG00000159377.11 | ENSP00000290541.6 | 260.7  | 792  |
| IYSQTYFRF    | 9  | 0.0018  | TNFSF10  | ENSG00000121858.11 | ENSP00000241261.2 | 281.8  | 843  |
| TYFRFQEEI    | 9  | 0.0914  | TNFSF10  | ENSG00000121858.11 | ENSP00000241261.2 | 281.8  | 843  |
| TYVYFTNEL    | 9  | 0.1507  | TNFSF10  | ENSG00000121858.11 | ENSP00000241261.2 | 281.8  | 843  |
| REKTPQVTF    | 9  | 0.0563  | C11orf96 | ENSG00000187479.7  | ENSP00000479976.1 | 240.8  | 366  |
| IWDTAGQERF   | 10 | 0.3388  | RAB1B    | ENSG00000174903.16 | ENSP00000310226.6 | 247.0  | 603  |
| KYPDAVATW    | 9  | 0.0027  | SPP1     | ENSG00000118785.14 | ENSP00000237623.7 | 725.9  | 900  |
| VYGPMKNYL    | 9  | 0.0244  | ANPEP    | ENSG00000166825.14 | ENSP00000300060.6 | 316.1  | 2901 |
| AQTTLRNV     | 8  | 40.0000 | STOM     | ENSG00000148175.12 | ENSP00000286713.2 | 262.6  | 864  |
| RYLQTLTTI    | 9  | 0.0160  | STOM     | ENSG00000148175.12 | ENSP00000286713.2 | 262.6  | 864  |
| VFIKAVHV     | 8  | 3.8628  | JCHAIN   | ENSG00000132465.11 | ENSP00000440066.2 | 241.5  | 477  |
| VYKVPPTTF    | 9  | 0.0019  | CAVIN1   | ENSG00000177469.13 | ENSP00000349541.4 | 234.4  | 1170 |
| EVNEAELLRR   | 10 | 45.5000 | CAVIN1   | ENSG00000177469.13 | ENSP00000349541.4 | 234.4  | 1170 |
| SGPPVSELITK  | 11 | 16.1818 | HIST1H1C | ENSG00000187837.3  | ENSP00000339566.2 | 225.8  | 639  |
| ASGPPVSELITK | 12 | 38.3333 | HIST1H1C | ENSG00000187837.3  | ENSP00000339566.2 | 225.8  | 639  |
| ETAAYLTK     | 9  | 28.0000 | HSPA5    | ENSG00000044574.8  | ENSP00000324173.6 | 224.0  | 1962 |
| TVFDAKRLIGR  | 11 | 27.3000 | HSPA5    | ENSG00000044574.8  | ENSP00000324173.6 | 224.0  | 1962 |
| NYARGHYTI    | 9  | 0.0422  | TUBA1A   | ENSG00000167552.14 | ENSP00000446637.1 | 269.4  | 1248 |

|             |    |         |          |                    |                   |       |      |
|-------------|----|---------|----------|--------------------|-------------------|-------|------|
| AYGFVARI    | 8  | 1.8018  | VWF      | ENSG00000110799.13 | ENSP00000261405.5 | 228.0 | 8439 |
| EVIASYAHL   | 9  | 5.6274  | VWF      | ENSG00000110799.13 | ENSP00000261405.5 | 228.0 | 8439 |
| RYLSDHSFL   | 9  | 0.0771  | VWF      | ENSG00000110799.13 | ENSP00000261405.5 | 228.0 | 8439 |
| EVIEKLFAM   | 9  | 4.8930  | EPAS1    | ENSG00000116016.14 | ENSP00000263734.3 | 249.6 | 2610 |
| LYLKALEGF   | 9  | 0.0273  | EPAS1    | ENSG00000116016.14 | ENSP00000263734.3 | 249.6 | 2610 |
| AQLLQLKV    | 8  | 25.6667 | FKBP8    | ENSG00000105701.16 | ENSP00000476767.1 | 289.5 | 1239 |
| NYKKFYEQF   | 9  | 0.0105  | HSP90AA1 | ENSG00000080824.18 | ENSP00000216281.7 | 254.3 | 2196 |
| TIGEILKK    | 8  | 55.0000 | HNRNPK   | ENSG00000165119.21 | ENSP00000317788.4 | 383.6 | 1389 |
| ETIGEILKK   | 9  | 20.2222 | HNRNPK   | ENSG00000165119.21 | ENSP00000317788.4 | 383.6 | 1389 |
| AQYLLQNSV   | 9  | 8.6807  | HNRNPK   | ENSG00000165119.21 | ENSP00000317788.4 | 383.6 | 1389 |
| EIAYS DVAKR | 10 | 49.0000 | CLIC4    | ENSG00000169504.15 | ENSP00000363500.4 | 215.4 | 759  |
| YIEHIFEI    | 8  | 1.1212  | PEA15    | ENSG00000162734.12 | ENSP00000353660.4 | 250.7 | 390  |
| SYIEHIFEI   | 9  | 0.0059  | PEA15    | ENSG00000162734.12 | ENSP00000353660.4 | 250.7 | 390  |
| RYGDLVDYL   | 9  | 0.1140  | PDGFRB   | ENSG00000113721.14 | ENSP00000261799.4 | 261.1 | 3318 |
| VLPKLYVKL   | 9  | 0.3164  | RPS26    | ENSG00000197728.11 | ENSP00000496643.1 | 379.2 | 345  |
| YLEKYYKF    | 8  | 0.2200  | NNMT     | ENSG00000166741.7  | ENSP00000299964.3 | 259.0 | 792  |
| DYLEKYYKF   | 9  | 0.0085  | NNMT     | ENSG00000166741.7  | ENSP00000299964.3 | 259.0 | 792  |
| YYMIGEQQF   | 9  | 0.0041  | NNMT     | ENSG00000166741.7  | ENSP00000299964.3 | 259.0 | 792  |
| RYQDAIRVF   | 9  | 0.0072  | EIF3L    | ENSG00000100129.18 | ENSP00000384634.1 | 258.9 | 1398 |
| EIINEDIAKR  | 10 | 49.0000 | PDIA6    | ENSG00000143870.12 | ENSP00000272227.3 | 230.6 | 1320 |
| TYLDHNNFW   | 9  | 0.0261  | MAOB     | ENSG00000069535.14 | ENSP00000367309.4 | 186.4 | 1560 |
| HQFDSVKRI   | 9  | 4.1305  | ENPEP    | ENSG00000138792.10 | ENSP00000265162.5 | 195.9 | 2871 |
| SYMGHFDLL   | 9  | 0.0245  | SF3B5    | ENSG00000169976.6  | ENSP00000356541.2 | 181.5 | 258  |
| ESITDVLVR   | 9  | 38.0000 | MCL1     | ENSG00000143384.13 | ENSP00000358022.2 | 196.6 | 1050 |
| EVIEIMTDR   | 9  | 31.5000 | HNRNPA1  | ENSG00000135486.17 | ENSP00000341826.6 | 444.3 | 1116 |
| SSSYGSGRRF  | 10 | 7.5071  | HNRNPA1  | ENSG00000135486.17 | ENSP00000341826.6 | 444.3 | 1116 |
| SGPYGGGQYF  | 11 | 0.1730  | HNRNPA1  | ENSG00000135486.17 | ENSP00000341826.6 | 444.3 | 1116 |

|              |    |         |           |                    |                   |        |      |
|--------------|----|---------|-----------|--------------------|-------------------|--------|------|
| SSSSYSGSRRF  | 11 | 8.2038  | HNRNPA1   | ENSG00000135486.17 | ENSP00000341826.6 | 444.3  | 1116 |
| SSSSYSGSRRF  | 12 | 12.6042 | HNRNPA1   | ENSG00000135486.17 | ENSP00000341826.6 | 444.3  | 1116 |
| HQAAIVSKI    | 9  | 3.7087  | CALD1     | ENSG00000122786.20 | ENSP00000354513.2 | 230.8  | 1614 |
| ETAGLKVGVSSR | 12 | 53.7500 | CALD1     | ENSG00000122786.20 | ENSP00000354513.2 | 230.8  | 1614 |
| YLDKTEQW     | 8  | 0.7174  | C4A       | ENSG00000244731.8  | ENSP00000396688.2 | 747.9  | 5232 |
| RYLDKTEQW    | 9  | 0.0047  | C4A       | ENSG00000244731.8  | ENSP00000396688.2 | 747.9  | 5232 |
| YYPRVEYGF    | 9  | 0.0091  | C4A       | ENSG00000244731.8  | ENSP00000396688.2 | 747.9  | 5232 |
| AFRGILQR     | 8  | 21.5000 | HLA-DQB1  | ENSG00000179344.16 | ENSP00000364080.4 | 294.9  | 807  |
| EVAFRGILQR   | 10 | 37.6667 | HLA-DQB1  | ENSG00000179344.16 | ENSP00000364080.4 | 294.9  | 807  |
| SLFAGGMLR    | 9  | 12.8264 | TMED9     | ENSG00000184840.11 | ENSP00000330945.6 | 183.8  | 705  |
| IGAENVYHNL   | 9  | 1.4658  | ENO1      | ENSG00000074800.16 | ENSP00000495530.1 | 1690.0 | 1302 |
| VYHNLKNVI    | 9  | 0.1946  | ENO1      | ENSG00000074800.16 | ENSP00000495530.1 | 1690.0 | 1302 |
| RYISPDQLADL  | 11 | 0.2320  | ENO1      | ENSG00000074800.16 | ENSP00000495530.1 | 1690.0 | 1302 |
| HQLSLRTV     | 8  | 19.1290 | NPM1      | ENSG00000181163.13 | ENSP00000377408.2 | 449.4  | 777  |
| TYMGHTGAVW   | 10 | 0.1733  | EIF3I     | ENSG00000084623.11 | ENSP00000362688.1 | 178.8  | 975  |
| KYDEIFYNL    | 9  | 0.0149  | EHD2      | ENSG00000024422.12 | ENSP00000263277.2 | 164.7  | 1629 |
| IYNGDMEKI    | 9  | 0.1535  | BNIP3     | ENSG00000176171.11 | ENSP00000357625.5 | 204.2  | 777  |
| LYSSENISNF   | 10 | 0.0756  | PDLIM1    | ENSG00000107438.9  | ENSP00000360305.3 | 171.2  | 987  |
| YIIGLLQQR    | 9  | 13.5225 | FBXL5     | ENSG00000118564.14 | ENSP00000425472.1 | 181.7  | 1836 |
| RYLDGWNAI    | 9  | 0.0772  | CYP27A1   | ENSG00000135929.9  | ENSP00000258415.4 | 184.5  | 1593 |
| EVIDDFMTR    | 9  | 10.9466 | CYP27A1   | ENSG00000135929.9  | ENSP00000258415.4 | 184.5  | 1593 |
| YYLNDLERI    | 9  | 0.0630  | GNAI2     | ENSG00000114353.17 | ENSP00000312999.6 | 420.9  | 1065 |
| KYPDRVPI     | 9  | 0.0180  | GABARAPL2 | ENSG00000034713.8  | ENSP00000037243.2 | 164.1  | 351  |
| KYGPQRQI     | 8  | 0.5562  | SF3B6     | ENSG00000115128.7  | ENSP00000233468.4 | 157.0  | 375  |
| VFIVSTGRGNF  | 11 | 1.5794  | VWA1      | ENSG00000179403.12 | ENSP00000417185.1 | 202.9  | 1335 |
| RYIPTAAAF    | 9  | 0.0046  | SEC61A1   | ENSG00000058262.10 | ENSP00000243253.3 | 156.2  | 1428 |
| VYLGHVIIYL   | 9  | 0.0162  | GJA4      | ENSG00000187513.9  | ENSP00000343676.4 | 176.1  | 999  |

|             |    |         |         |                    |                   |       |       |
|-------------|----|---------|---------|--------------------|-------------------|-------|-------|
| RMNPNSPSI   | 9  | 1.1774  | ERH     | ENSG00000100632.11 | ENSP00000451080.1 | 154.5 | 312   |
| LYYVDEHGTRL | 11 | 0.7654  | PSMB8   | ENSG00000204264.11 | ENSP00000364016.3 | 245.9 | 828   |
| ETIKGIQKR   | 9  | 21.4545 | ITM2B   | ENSG00000136156.15 | ENSP00000497221.1 | 262.3 | 798   |
| ELIAKIPNF   | 9  | 0.9133  | SET     | ENSG00000119335.16 | ENSP00000318012.8 | 174.5 | 831   |
| RYIANTVEL   | 9  | 0.0295  | RPN2    | ENSG00000118705.17 | ENSP00000237530.6 | 252.3 | 1893  |
| PYISNIYLI   | 9  | 0.0371  | PLOD1   | ENSG00000083444.17 | ENSP00000196061.4 | 144.4 | 2181  |
| DYLRKFYLY   | 9  | 0.3325  | MMP7    | ENSG00000137673.9  | ENSP00000260227.4 | 134.4 | 801   |
| PYSQVWIHF   | 9  | 0.0108  | CUBN    | ENSG00000107611.15 | ENSP00000367064.4 | 141.8 | 10869 |
| HVVHGRILEM  | 10 | 24.2857 | CUBN    | ENSG00000107611.15 | ENSP00000367064.4 | 141.8 | 10869 |
| KYLATLETL   | 9  | 0.0213  | JAK1    | ENSG00000162434.12 | ENSP00000343204.4 | 135.9 | 3462  |
| HYPLNTVTF   | 9  | 0.0074  | TNS1    | ENSG00000079308.19 | ENSP00000498399.1 | 161.9 | 5481  |
| VYTSGIYNI   | 9  | 0.0158  | TNS1    | ENSG00000079308.19 | ENSP00000498399.1 | 161.9 | 5481  |
| FQYFVKVV    | 8  | 27.9000 | ERGIC3  | ENSG00000125991.19 | ENSP00000399124.1 | 327.1 | 1191  |
| KMPKVKMPKF  | 10 | 0.3886  | AHNAK   | ENSG00000124942.14 | ENSP00000367263.4 | 142.4 | 17670 |
| KMPKMKMPTF  | 10 | 0.3399  | AHNAK   | ENSG00000124942.14 | ENSP00000367263.4 | 142.4 | 17670 |
| KYAPSGFYI   | 9  | 0.0119  | WDR1    | ENSG00000071127.17 | ENSP00000371890.2 | 183.0 | 1818  |
| KYLDIPKML   | 9  | 0.0220  | ACTN4   | ENSG00000130402.12 | ENSP00000252699.2 | 490.3 | 2733  |
| KYLSDNVHL   | 9  | 0.0732  | CDC37   | ENSG00000105401.9  | ENSP00000222005.1 | 204.7 | 1134  |
| VYVQHPITF   | 9  | 0.0016  | LITAF   | ENSG00000189067.12 | ENSP00000340118.5 | 131.5 | 483   |
| KYLSVQGQLF  | 10 | 0.0077  | MTCH1   | ENSG00000137409.19 | ENSP00000362730.5 | 204.4 | 1167  |
| MQIRIHQI    | 8  | 6.1989  | DNAJA1  | ENSG00000086061.16 | ENSP00000369127.3 | 112.5 | 1191  |
| AQYLINVRL   | 9  | 3.6929  | PCBP2   | ENSG00000197111.15 | ENSP00000448762.1 | 501.6 | 1086  |
| TYISKTIAL   | 9  | 0.0533  | EXOC3L2 | ENSG00000283632.2  | ENSP00000400713.2 | 108.7 | 2406  |
| EVMRLVKGM   | 9  | 17.5778 | ASNA1   | ENSG00000198356.11 | ENSP00000481254.1 | 119.5 | 993   |
| VYSRTFTW    | 8  | 0.1570  | MYO1C   | ENSG00000197879.17 | ENSP00000354283.2 | 137.3 | 3084  |
| VYSRTFTWL   | 9  | 0.0981  | MYO1C   | ENSG00000197879.17 | ENSP00000354283.2 | 137.3 | 3084  |
| NYPQSVPRL   | 9  | 0.0404  | MYO1C   | ENSG00000197879.17 | ENSP00000354283.2 | 137.3 | 3084  |

|             |    |         |           |                    |                   |       |      |
|-------------|----|---------|-----------|--------------------|-------------------|-------|------|
| FYPYGLQTF   | 9  | 0.0102  | SUN2      | ENSG00000100242.15 | ENSP00000385616.1 | 158.7 | 2214 |
| VYGPLPQSF   | 9  | 0.0008  | COX411    | ENSG00000131143.8  | ENSP00000455301.1 | 323.9 | 324  |
| HQQVVSRI    | 8  | 15.9855 | SLC9A3R1  | ENSG00000109062.12 | ENSP00000262613.5 | 112.3 | 1074 |
| YSVYVYKVLK  | 10 | 43.0000 | HIST1H2BD | ENSG00000158373.8  | ENSP00000289316.2 | 135.1 | 378  |
| VYPRPIITW   | 9  | 0.0036  | HHLA2     | ENSG00000114455.13 | ENSP00000482187.1 | 120.4 | 1242 |
| RQLVFRYHV   | 9  | 4.2040  | STAB1     | ENSG00000010327.10 | ENSP00000312946.6 | 172.7 | 7710 |
| KYKDQPQQT   | 10 | 0.0156  | STAB1     | ENSG00000010327.10 | ENSP00000312946.6 | 172.7 | 7710 |
| EITESGRIGF  | 10 | 14.0333 | ITGB2     | ENSG00000160255.18 | ENSP00000303242.6 | 185.7 | 2379 |
| SYTNVYRMF   | 9  | 0.0100  | GLYATL1   | ENSG00000166840.13 | ENSP00000479741.1 | 194.6 | 906  |
| PEPAKSAPAPK | 11 | 48.0000 | HIST1H2BK | ENSG00000197903.7  | ENSP00000349430.1 | 101.2 | 378  |
| ETPSWTGSGF  | 10 | 4.5089  | LAMB2     | ENSG00000172037.14 | ENSP00000307156.4 | 283.2 | 5394 |
| VYGFVREAL   | 9  | 0.2693  | UBXN6     | ENSG00000167671.12 | ENSP00000301281.5 | 124.0 | 1323 |
| DVYENLYAGR  | 10 | 30.0000 | MAPKAPK2  | ENSG00000162889.10 | ENSP00000356070.3 | 111.4 | 1200 |
| GYIHVTQTF   | 9  | 0.0035  | NKG7      | ENSG00000105374.10 | ENSP00000221978.4 | 138.6 | 495  |
| VYLAAVNRL   | 9  | 0.0222  | PLXND1    | ENSG00000004399.12 | ENSP00000317128.4 | 211.5 | 5775 |
| GLQFPVGR    | 8  | 45.5000 | H2AFJ     | ENSG00000246705.4  | ENSP00000438553.1 | 119.8 | 387  |
| AGLQFPVGR   | 9  | 23.7500 | H2AFJ     | ENSG00000246705.4  | ENSP00000438553.1 | 119.8 | 387  |
| GLQFPVGRVHR | 11 | 25.3333 | H2AFJ     | ENSG00000246705.4  | ENSP00000438553.1 | 119.8 | 387  |
| KFTPVASKF   | 9  | 0.0207  | ZYX       | ENSG00000159840.16 | ENSP00000376642.2 | 118.7 | 1245 |
| VYGOESGGF   | 9  | 0.2200  | EWSR1     | ENSG00000182944.17 | ENSP00000331699.6 | 167.7 | 1800 |
| KYWDVPPPGF  | 10 | 0.0536  | U2AF2     | ENSG00000063244.12 | ENSP00000388475.1 | 133.4 | 1413 |
| YISEHEHF    | 8  | 0.4765  | CLPTM1    | ENSG00000104853.16 | ENSP00000443192.1 | 114.6 | 1701 |
| VYISEHEHF   | 9  | 0.0020  | CLPTM1    | ENSG00000104853.16 | ENSP00000443192.1 | 114.6 | 1701 |
| EVIKQLKEKM  | 10 | 22.2632 | SBDS      | ENSG00000126524.10 | ENSP00000246868.2 | 97.1  | 750  |
| YYEEQHPEL   | 9  | 0.1204  | IL32      | ENSG00000008517.16 | ENSP00000433866.3 | 460.4 | 663  |
| EVIQHRFESL  | 10 | 14.7111 | SPTBN1    | ENSG00000115306.16 | ENSP00000334156.5 | 262.0 | 6465 |
| KWNPTAGVAF  | 10 | 0.1926  | POLR2C    | ENSG00000102978.13 | ENSP00000219252.4 | 100.6 | 825  |

|              |    |         |          |                    |                   |       |      |
|--------------|----|---------|----------|--------------------|-------------------|-------|------|
| YFKDTHPKF    | 9  | 0.0239  | CYB5R3   | ENSG00000100243.21 | ENSP00000338461.6 | 176.1 | 903  |
| EIISHDTRR    | 9  | 39.0000 | CYB5R3   | ENSG00000100243.21 | ENSP00000338461.6 | 176.1 | 903  |
| LYADVGGKQF   | 10 | 0.1143  | SSR4     | ENSG00000180879.13 | ENSP00000359103.3 | 246.5 | 519  |
| IQYALRTL     | 8  | 7.6586  | SARS     | ENSG00000031698.13 | ENSP00000234677.2 | 139.0 | 1542 |
| EVMQEVAQL    | 9  | 6.5793  | SARS     | ENSG00000031698.13 | ENSP00000234677.2 | 139.0 | 1542 |
| KYGSNVHRI    | 9  | 0.0247  | PPP1R9B  | ENSG00000108819.11 | ENSP00000478767.1 | 102.3 | 2451 |
| AYLEAIHNF    | 9  | 0.0009  | AP2S1    | ENSG00000042753.11 | ENSP00000263270.5 | 135.9 | 426  |
| VYTVVDEMF    | 9  | 0.0213  | AP2S1    | ENSG00000042753.11 | ENSP00000263270.5 | 135.9 | 426  |
| SYGGPASQQL   | 10 | 0.2050  | HNRNP2   | ENSG00000126945.9  | ENSP00000361927.2 | 85.7  | 1347 |
| KYGNSNYL     | 9  | 0.1072  | FLT1     | ENSG00000102755.12 | ENSP00000282397.4 | 129.2 | 4014 |
| RYVRKFVLM    | 9  | 0.0737  | CHMP2A   | ENSG00000130724.8  | ENSP00000469240.1 | 160.5 | 666  |
| EYVNDFDLMKF  | 11 | 0.2465  | MAF      | ENSG00000178573.7  | ENSP00000377019.1 | 103.5 | 1119 |
| SMMGSDMRTERF | 12 | 3.3376  | SFPQ     | ENSG00000116560.11 | ENSP00000349748.5 | 206.9 | 2121 |
| QYLSRFESW    | 9  | 0.0096  | BHLHE41  | ENSG00000123095.6  | ENSP00000242728.4 | 89.5  | 1446 |
| RYRGDYDRF    | 9  | 0.1135  | HNRNPUL2 | ENSG00000214753.3  | ENSP00000301785.5 | 86.5  | 2241 |
| NYIEKVRFL    | 9  | 0.0724  | DES      | ENSG00000175084.11 | ENSP00000363071.3 | 84.4  | 1410 |
| LYIVHPTMF    | 9  | 0.0088  | ARHGAP1  | ENSG00000175220.12 | ENSP00000310491.4 | 86.7  | 1317 |
| NYTPYKYNL    | 9  | 0.0744  | HGD      | ENSG00000113924.12 | ENSP00000283871.5 | 143.1 | 1335 |
| SYKNGFLNL    | 9  | 0.0659  | UBA1     | ENSG00000130985.17 | ENSP00000338413.6 | 224.2 | 3174 |
| EIVSRVSKR    | 9  | 28.1250 | UBA1     | ENSG00000130985.17 | ENSP00000338413.6 | 224.2 | 3174 |
| EVVDFIQSKI   | 10 | 21.8182 | PPM1G    | ENSG00000115241.11 | ENSP00000342778.4 | 82.2  | 1638 |
| LQLQIPRI     | 8  | 12.0903 | PSME1    | ENSG00000092010.15 | ENSP00000206451.6 | 279.0 | 747  |
| LYDIILKNF    | 9  | 0.0433  | PSME1    | ENSG00000092010.15 | ENSP00000206451.6 | 279.0 | 747  |
| VFMKSVKLEW   | 10 | 0.3481  | PRPF6    | ENSG00000101161.8  | ENSP00000266079.4 | 79.8  | 2823 |
| KYPENFLL     | 9  | 0.0032  | PPP1CA   | ENSG00000172531.15 | ENSP00000350974.4 | 151.6 | 858  |
| EVVAKFLHK    | 9  | 21.3636 | PPP1CA   | ENSG00000172531.15 | ENSP00000350974.4 | 151.6 | 858  |
| YFAERVTSL    | 9  | 0.3110  | CRIP1    | ENSG00000213145.9  | ENSP00000332449.7 | 228.2 | 231  |

|              |    |         |         |                    |                   |       |       |
|--------------|----|---------|---------|--------------------|-------------------|-------|-------|
| VYFAERVTSL   | 10 | 0.2413  | CRIP1   | ENSG00000213145.9  | ENSP00000332449.7 | 228.2 | 231   |
| KYLDNPNAL    | 9  | 0.0499  | KANK2   | ENSG00000197256.10 | ENSP00000465650.1 | 97.8  | 2553  |
| EVADPTAHR    | 9  | 11.2283 | KANK2   | ENSG00000197256.10 | ENSP00000465650.1 | 97.8  | 2553  |
| AYTTVLQEW    | 9  | 0.0210  | KANK2   | ENSG00000197256.10 | ENSP00000465650.1 | 97.8  | 2553  |
| EVADPTAHRR   | 10 | 20.5926 | KANK2   | ENSG00000197256.10 | ENSP00000465650.1 | 97.8  | 2553  |
| QYESKVFYL    | 9  | 0.1158  | YWHAG   | ENSG00000170027.7  | ENSP00000306330.3 | 78.0  | 741   |
| RYDEHAYKW    | 9  | 0.0111  | BBOX1   | ENSG00000129151.9  | ENSP00000433772.1 | 80.3  | 1161  |
| QYSRFSLENNF  | 11 | 0.2339  | STAT1   | ENSG00000115415.18 | ENSP00000438703.1 | 107.1 | 579   |
| KYVKILYDF    | 9  | 0.0095  | EPS8L2  | ENSG00000177106.16 | ENSP00000436035.1 | 265.7 | 2145  |
| RYVAGIEGF    | 9  | 0.0228  | SEL1L3  | ENSG00000091490.11 | ENSP00000425438.1 | 135.2 | 2937  |
| YYITGNLETF   | 10 | 0.0090  | SEL1L3  | ENSG00000091490.11 | ENSP00000425438.1 | 135.2 | 2937  |
| TYQEVAKQF    | 9  | 0.0014  | ADA2    | ENSG00000093072.18 | ENSP00000496894.1 | 143.9 | 207   |
| KFVETHPEF    | 9  | 0.0294  | ADA2    | ENSG00000093072.18 | ENSP00000496894.1 | 143.9 | 207   |
| YYHARVYEF    | 9  | 0.0023  | PSMD3   | ENSG00000108344.15 | ENSP00000264639.4 | 89.9  | 1602  |
| RYIKKLAKW    | 9  | 0.0163  | CNDP2   | ENSG00000133313.15 | ENSP00000325548.4 | 206.8 | 1425  |
| KYQEEFEHF    | 9  | 0.0016  | LMAN1   | ENSG00000074695.6  | ENSP00000251047.4 | 77.5  | 1530  |
| GQRYFLNHI    | 9  | 9.7647  | VWTR1   | ENSG00000018408.14 | ENSP00000419465.1 | 88.5  | 1200  |
| IFSNVRINL    | 9  | 0.4230  | CAV1    | ENSG00000105974.12 | ENSP00000377110.1 | 92.6  | 441   |
| SQIPLSKI     | 8  | 10.3550 | XRCC5   | ENSG00000079246.16 | ENSP00000375977.2 | 106.7 | 2196  |
| VYEGPELNHAF  | 11 | 0.0416  | LRP1    | ENSG00000123384.13 | ENSP00000243077.3 | 104.7 | 13632 |
| QQIRINEV     | 8  | 20.7407 | TWF2    | ENSG00000247596.9  | ENSP00000303908.4 | 72.6  | 1047  |
| EVAPPEYHRK   | 10 | 20.9259 | MORF4L1 | ENSG00000185787.14 | ENSP00000408880.2 | 174.3 | 969   |
| KYLAKNSATLF  | 11 | 0.0584  | MORF4L1 | ENSG00000185787.14 | ENSP00000408880.2 | 174.3 | 969   |
| KYQEVTTNNL   | 9  | 0.0116  | CAPRIN1 | ENSG00000135387.21 | ENSP00000434150.1 | 106.8 | 2127  |
| KYQEVTTNNLEF | 11 | 0.0154  | CAPRIN1 | ENSG00000135387.21 | ENSP00000434150.1 | 106.8 | 2127  |
| TVVEDVTVGR   | 10 | 28.0000 | ZFYVE21 | ENSG00000100711.13 | ENSP00000310543.2 | 83.2  | 702   |
| SYKYEHLRW    | 9  | 0.1621  | FLT4    | ENSG00000037280.16 | ENSP00000261937.6 | 92.8  | 4089  |

|              |    |         |          |                    |                   |       |      |
|--------------|----|---------|----------|--------------------|-------------------|-------|------|
| KYGNLSNFL    | 9  | 0.1237  | FLT4     | ENSG00000037280.16 | ENSP00000261937.6 | 92.8  | 4089 |
| KFYTDPSYF    | 9  | 0.0750  | WASF2    | ENSG00000158195.11 | ENSP00000483313.1 | 69.3  | 1494 |
| YYFEGIKQTF   | 10 | 0.0027  | AHSA1    | ENSG00000100591.8  | ENSP00000216479.3 | 93.8  | 1014 |
| IYISTLKTEF   | 10 | 0.0238  | AHSA1    | ENSG00000100591.8  | ENSP00000216479.3 | 93.8  | 1014 |
| EYSKQMORF    | 9  | 0.0416  | HDAC1    | ENSG00000116478.12 | ENSP00000362649.3 | 107.2 | 1446 |
| VQLRLNSI     | 8  | 12.9167 | PPP2R1A  | ENSG00000105568.18 | ENSP00000324804.6 | 139.0 | 1767 |
| KYVPAIAHL    | 9  | 0.0073  | CPVL     | ENSG00000106066.15 | ENSP00000265394.5 | 75.9  | 1428 |
| KYVPAIAHLIHS | 12 | 6.9851  | CPVL     | ENSG00000106066.15 | ENSP00000265394.5 | 75.9  | 1428 |
| HQNVPNHI     | 9  | 2.8119  | ANKRD10  | ENSG00000088448.14 | ENSP00000267339.2 | 162.9 | 1260 |
| QYLPHVARL    | 9  | 0.0178  | SURF4    | ENSG00000148248.14 | ENSP00000361057.3 | 72.6  | 807  |
| KYLTAEAFGF   | 10 | 0.1492  | FSCN1    | ENSG00000075618.18 | ENSP00000371798.3 | 132.9 | 1479 |
| HFIAEHYMF    | 9  | 0.0437  | DEGS1    | ENSG00000143753.13 | ENSP00000316476.4 | 76.2  | 969  |
| DTISPYSRM    | 9  | 6.3865  | DEGS1    | ENSG00000143753.13 | ENSP00000316476.4 | 76.2  | 969  |
| KYPEIKSLM    | 9  | 0.0567  | DEGS1    | ENSG00000143753.13 | ENSP00000316476.4 | 76.2  | 969  |
| AYDTRWEF     | 9  | 0.0303  | DPP7     | ENSG00000176978.14 | ENSP00000360635.2 | 266.4 | 1476 |
| EYALLYHTL    | 9  | 0.0333  | AOC1     | ENSG00000002726.20 | ENSP00000411613.2 | 149.2 | 2310 |
| FFKPHWDEKF   | 10 | 0.2620  | SERPINH1 | ENSG00000149257.14 | ENSP00000434412.1 | 82.4  | 1254 |
| YLEKPMEI     | 8  | 1.7088  | STAT3    | ENSG00000168610.14 | ENSP00000264657.4 | 111.6 | 2310 |
| RYLEKPMEI    | 9  | 0.0074  | STAT3    | ENSG00000168610.14 | ENSP00000264657.4 | 111.6 | 2310 |
| RYLEQLHQL    | 9  | 0.0039  | STAT3    | ENSG00000168610.14 | ENSP00000264657.4 | 111.6 | 2310 |
| IYQRDPLKL    | 9  | 0.0232  | STAT6    | ENSG00000166888.12 | ENSP00000451546.2 | 228.6 | 2595 |
| AYNEGIINLL   | 10 | 0.2395  | PICALM   | ENSG00000073921.18 | ENSP00000433846.1 | 156.3 | 1935 |
| RYLQSTQAI    | 9  | 0.0388  | SETD3    | ENSG00000183576.13 | ENSP00000327436.5 | 67.7  | 1782 |
| PYKVTQDEL    | 9  | 0.5289  | NCL      | ENSG00000115053.16 | ENSP00000318195.4 | 161.2 | 2130 |
| AVVDVRIGMTR  | 11 | 31.3333 | NCL      | ENSG00000115053.16 | ENSP00000318195.4 | 161.2 | 2130 |
| VVTNRFQQL    | 9  | 3.6831  | SERBP1   | ENSG00000142864.14 | ENSP00000360034.2 | 104.1 | 1224 |
| GQWKKGFVL    | 9  | 2.7258  | SERBP1   | ENSG00000142864.14 | ENSP00000360034.2 | 104.1 | 1224 |

|              |    |         |         |                    |                   |       |      |
|--------------|----|---------|---------|--------------------|-------------------|-------|------|
| VVTNRFQQLF   | 10 | 3.1855  | SERBP1  | ENSG00000142864.14 | ENSP00000360034.2 | 104.1 | 1224 |
| EYTDVYPEI    | 9  | 0.0982  | MAGED2  | ENSG00000102316.17 | ENSP00000364198.1 | 172.8 | 1818 |
| AEPAVQRTLLEK | 12 | 45.0000 | CD99    | ENSG00000002586.20 | ENSP00000485427.1 | 115.0 | 552  |
| RWFDKSFTF    | 9  | 0.0040  | CPT1A   | ENSG00000110090.13 | ENSP00000265641.4 | 66.6  | 2319 |
| RYPDRITLI    | 9  | 0.0115  | PPP4C   | ENSG00000149923.14 | ENSP00000455995.1 | 96.7  | 921  |
| RYASINTHL    | 9  | 0.0285  | CSNK1E  | ENSG00000213923.12 | ENSP00000380044.1 | 279.7 | 1248 |
| RYFIAPAKF    | 9  | 0.0053  | LAMC1   | ENSG00000135862.6  | ENSP00000258341.3 | 66.1  | 4827 |
| TYTDVTPRQF   | 10 | 0.0234  | STARD7  | ENSG00000084090.13 | ENSP00000338030.5 | 78.2  | 1110 |
| TYTDVTPRQFF  | 11 | 0.0277  | STARD7  | ENSG00000084090.13 | ENSP00000338030.5 | 78.2  | 1110 |
| VYGTVFHI     | 8  | 0.4262  | GLYAT   | ENSG00000149124.11 | ENSP00000278400.3 | 89.0  | 489  |
| HVIVDEIHER   | 10 | 27.7000 | DHX9    | ENSG00000135829.17 | ENSP00000356520.3 | 76.8  | 3810 |
| YIDRVRS�     | 8  | 2.5583  | KRT18   | ENSG00000111057.11 | ENSP00000373487.3 | 125.9 | 1290 |
| RYALQMEQL    | 9  | 0.0971  | KRT18   | ENSG00000111057.11 | ENSP00000373487.3 | 125.9 | 1290 |
| TYLVDMRRF    | 9  | 0.0387  | FZD1    | ENSG00000157240.3  | ENSP00000287934.2 | 59.1  | 1941 |
| KFIWTNHKF    | 9  | 0.0245  | NDUFA12 | ENSG00000184752.13 | ENSP00000330737.2 | 68.3  | 435  |
| SYGKVTAEF    | 9  | 0.0034  | ALPK2   | ENSG00000198796.7  | ENSP00000354991.3 | 83.9  | 6510 |
| ETVGFGLK     | 9  | 33.5000 | LAMTOR2 | ENSG00000116586.11 | ENSP00000357288.4 | 122.1 | 375  |
| EVGVGFATR    | 9  | 36.0000 | FABP4   | ENSG00000170323.8  | ENSP00000256104.4 | 63.0  | 396  |
| IYIAGHPAF    | 9  | 0.0099  | HNRNPL  | ENSG00000104824.17 | ENSP00000221419.4 | 167.1 | 1767 |
| SQFSYQHAI    | 9  | 2.5023  | EIF3H   | ENSG00000147677.11 | ENSP00000428195.1 | 142.6 | 732  |
| VYHHLVETL    | 9  | 0.0106  | GGT5    | ENSG00000099998.17 | ENSP00000381340.3 | 78.5  | 1761 |
| YIKHPVSL     | 8  | 1.2395  | PSMD8   | ENSG00000099341.11 | ENSP00000215071.4 | 103.0 | 1050 |
| VYIKHPVSL    | 9  | 0.0059  | PSMD8   | ENSG00000099341.11 | ENSP00000215071.4 | 103.0 | 1050 |
| TYTLRVFEL    | 9  | 0.0961  | PTPRC   | ENSG00000081237.20 | ENSP00000306782.7 | 86.9  | 3435 |
| ESIGRVLAQR   | 10 | 39.5000 | MRPL18  | ENSG00000112110.10 | ENSP00000356001.4 | 62.9  | 540  |
| IYNHITTRV    | 9  | 0.1704  | ADD1    | ENSG00000087274.17 | ENSP00000348100.3 | 145.3 | 1986 |
| EYATKISRF    | 9  | 0.0315  | PITHD1  | ENSG00000057757.10 | ENSP00000246151.4 | 62.3  | 633  |

|             |    |         |         |                    |                   |       |       |
|-------------|----|---------|---------|--------------------|-------------------|-------|-------|
| QYAPSTAQF   | 9  | 0.0024  | ZMIZ2   | ENSG00000122515.15 | ENSP00000265346.7 | 116.9 | 2682  |
| MQVLVSRI    | 8  | 20.1852 | BCL2L1  | ENSG00000171552.13 | ENSP00000365230.2 | 100.1 | 699   |
| TYGGSWKF    | 8  | 0.1706  | AIG1    | ENSG00000146416.18 | ENSP00000350509.4 | 88.3  | 714   |
| AYVPGFAHI   | 9  | 0.0192  | CUEDC2  | ENSG00000107874.11 | ENSP00000358953.4 | 81.2  | 861   |
| HQITVLHV    | 8  | 19.0968 | ELOVL5  | ENSG00000012660.14 | ENSP00000306640.6 | 71.9  | 897   |
| KYITQGQLL   | 9  | 0.0246  | ELOVL5  | ENSG00000012660.14 | ENSP00000306640.6 | 71.9  | 897   |
| KYITQGQLLQF | 11 | 0.0263  | ELOVL5  | ENSG00000012660.14 | ENSP00000306640.6 | 71.9  | 897   |
| KYSKRFPPEL  | 9  | 0.0329  | PRPF31  | ENSG00000105618.14 | ENSP00000375635.1 | 77.5  | 1479  |
| FVVEKVLDR   | 9  | 27.9000 | CBX3    | ENSG00000122565.19 | ENSP00000387348.1 | 104.4 | 303   |
| SVFPQNGAAR  | 10 | 17.0667 | KAT5    | ENSG00000172977.13 | ENSP00000434765.1 | 94.0  | 1482  |
| KQMRILMV    | 8  | 14.7778 | ARF5    | ENSG00000004059.11 | ENSP00000000233.5 | 123.1 | 540   |
| IYPELQIERF  | 10 | 0.0069  | APBB11P | ENSG00000077420.16 | ENSP00000365411.4 | 56.6  | 1998  |
| QYVTQINRL   | 9  | 0.0954  | PREX1   | ENSG00000124126.14 | ENSP00000361009.3 | 84.4  | 4977  |
| VFHPSQDLVF  | 10 | 0.1043  | PRPF19  | ENSG00000110107.9  | ENSP00000227524.4 | 81.6  | 1512  |
| VYSPHVLNL   | 9  | 0.0042  | DNM2    | ENSG00000079805.16 | ENSP00000352721.6 | 157.6 | 2598  |
| VYSPHVLNLTL | 11 | 0.0719  | DNM2    | ENSG00000079805.16 | ENSP00000352721.6 | 157.6 | 2598  |
| EVIPPYYSY   | 9  | 2.6495  | TDP2    | ENSG00000111802.14 | ENSP00000367440.4 | 72.5  | 1086  |
| IYLEKLKTI   | 9  | 0.0161  | PLEC    | ENSG00000178209.15 | ENSP00000434583.1 | 86.0  | 13710 |
| YVIDPIKGL   | 9  | 3.7410  | PLEC    | ENSG00000178209.15 | ENSP00000434583.1 | 86.0  | 13710 |
| RYLSPKYIKMF | 11 | 0.0459  | EIF4A1  | ENSG00000161960.15 | ENSP00000293831.8 | 133.8 | 1218  |
| KQMRILHV    | 8  | 10.6412 | GNAS    | ENSG00000087460.25 | ENSP00000360136.3 | 672.6 | 1140  |
| KYQKGFSLW   | 9  | 0.0098  | TRAM1   | ENSG00000067167.8  | ENSP00000262213.2 | 70.6  | 1122  |
| AYLLNLNHL   | 9  | 0.0529  | TRAM1   | ENSG00000067167.8  | ENSP00000262213.2 | 70.6  | 1122  |
| AYPHNLMTF   | 9  | 0.0041  | TRAM1   | ENSG00000067167.8  | ENSP00000262213.2 | 70.6  | 1122  |
| VYSEVHFTL   | 9  | 0.0025  | SYNPO   | ENSG00000171992.13 | ENSP00000302139.4 | 62.7  | 2709  |
| SYLERYQRF   | 9  | 0.0021  | TNK2    | ENSG00000061938.18 | ENSP00000329425.6 | 58.9  | 3114  |
| YLENALKL    | 8  | 2.0426  | GBP4    | ENSG00000162654.9  | ENSP00000359490.5 | 60.9  | 1920  |

|              |    |         |         |                    |                   |       |      |
|--------------|----|---------|---------|--------------------|-------------------|-------|------|
| EYLENALKL    | 9  | 0.1132  | GBP4    | ENSG00000162654.9  | ENSP00000359490.5 | 60.9  | 1920 |
| YYIDKLEYL    | 9  | 0.0077  | NET1    | ENSG00000173848.19 | ENSP00000369717.3 | 62.0  | 1626 |
| KYMAEALLL    | 9  | 0.0244  | TOMM70  | ENSG00000154174.7  | ENSP00000284320.5 | 53.0  | 1824 |
| FQIQISRI     | 8  | 12.4722 | OSMR    | ENSG00000145623.13 | ENSP00000274276.3 | 57.2  | 2937 |
| RYHSDFNQRDRF | 12 | 0.3049  | SAFB    | ENSG00000160633.13 | ENSP00000415895.1 | 102.0 | 2544 |
| IIGLQMGTKNF  | 11 | 4.6650  | CNN1    | ENSG00000130176.8  | ENSP00000252456.1 | 92.5  | 891  |
| RYMSINTHL    | 9  | 0.0176  | CSNK1G2 | ENSG00000133275.16 | ENSP00000255641.7 | 63.6  | 1245 |
| RYVRRLDFF    | 9  | 0.0371  | CSNK1G2 | ENSG00000133275.16 | ENSP00000255641.7 | 63.6  | 1245 |
| RYMPQNPHI    | 9  | 0.0093  | RBBP7   | ENSG00000102054.17 | ENSP00000386068.1 | 76.8  | 1248 |
| RYMPQNPHII   | 10 | 0.0583  | RBBP7   | ENSG00000102054.17 | ENSP00000386068.1 | 76.8  | 1248 |
| VMSQALKATF   | 10 | 1.4321  | ETS2    | ENSG00000157557.13 | ENSP00000499315.1 | 102.8 | 1407 |
| LYRLKFNEF    | 9  | 0.1612  | ARL4C   | ENSG00000188042.8  | ENSP00000375057.2 | 49.9  | 576  |
| NYPETLGRLLI  | 11 | 0.5073  | SEC14L1 | ENSG00000129657.16 | ENSP00000389838.1 | 125.4 | 2043 |
| TQFKWIHI     | 8  | 5.9304  | KHK     | ENSG00000138030.13 | ENSP00000260598.5 | 93.9  | 894  |
| TQRIFQEAV    | 9  | 18.5789 | NRARP   | ENSG00000198435.4  | ENSP00000349041.2 | 49.1  | 342  |
| YYLTDVDRI    | 9  | 0.1693  | GNA11   | ENSG00000088256.9  | ENSP00000078429.3 | 55.2  | 1077 |
| YVVEKVLDR    | 9  | 21.2727 | CBX1    | ENSG00000108468.15 | ENSP00000225603.4 | 50.4  | 555  |
| IYTSSVNRL    | 9  | 0.0348  | COPB2   | ENSG00000184432.10 | ENSP00000422295.1 | 83.6  | 2631 |
| TYMDAQLFKKV  | 11 | 0.8788  | RGL1    | ENSG00000143344.15 | ENSP00000354097.3 | 49.0  | 2304 |
| TYQDIQNTI    | 9  | 0.0114  | POLR2A  | ENSG00000181222.16 | ENSP00000499521.1 | 62.9  | 5910 |
| AYPYNFNL     | 9  | 0.1366  | ZBTB4   | ENSG00000174282.12 | ENSP00000369973.4 | 49.1  | 3039 |
| KYSLVKNKI    | 9  | 0.0825  | S100A16 | ENSG00000188643.11 | ENSP00000357694.1 | 113.0 | 309  |
| NYLVLPNRI    | 9  | 0.0900  | ESYT2   | ENSG00000117868.16 | ENSP00000499020.1 | 54.4  | 2679 |
| IYLLIHNNF    | 9  | 0.0094  | CD53    | ENSG00000143119.14 | ENSP00000271324.5 | 108.1 | 657  |
| IFKPPDPDNTF  | 11 | 0.1027  | MOAP1   | ENSG00000165943.5  | ENSP00000298894.4 | 49.6  | 1053 |
| YYDKHFTEF    | 9  | 0.0045  | ATP6V1A | ENSG00000114573.10 | ENSP00000273398.3 | 48.2  | 1851 |
| EYYDKHFTEF   | 10 | 0.0239  | ATP6V1A | ENSG00000114573.10 | ENSP00000273398.3 | 48.2  | 1851 |

|             |    |         |         |                    |                    |       |      |
|-------------|----|---------|---------|--------------------|--------------------|-------|------|
| SMFQVRTL    | 8  | 6.5233  | CD36    | ENSG00000135218.19 | ENSP00000308165.7  | 102.3 | 1416 |
| EYMYQVMKF   | 9  | 0.0145  | MIOX    | ENSG00000100253.13 | ENSP00000216075.6  | 81.8  | 855  |
| VYNANINLF   | 9  | 0.0025  | PKD2    | ENSG00000118762.8  | ENSP00000237596.2  | 51.6  | 2904 |
| YYTKGFALL   | 9  | 0.0233  | PLOD2   | ENSG00000152952.12 | ENSP00000353170.3  | 52.5  | 2211 |
| PYMANVYLI   | 9  | 0.0795  | PLOD2   | ENSG00000152952.12 | ENSP00000353170.3  | 52.5  | 2211 |
| VYVYGVDRF   | 9  | 0.0215  | SLC6A19 | ENSG00000174358.16 | ENSP00000305302.10 | 47.9  | 1902 |
| SVIGFRATQR  | 10 | 25.6667 | SLC6A19 | ENSG00000174358.16 | ENSP00000305302.10 | 47.9  | 1902 |
| FVIDSDHLGHR | 11 | 30.6667 | COASY   | ENSG00000068120.15 | ENSP00000393564.2  | 60.6  | 1692 |
| TQYRAMFV    | 8  | 27.0000 | EAPP    | ENSG00000129518.9  | ENSP00000250454.3  | 49.8  | 855  |
| EAAQKFLER   | 9  | 18.6579 | KPNB1   | ENSG00000108424.10 | ENSP00000290158.3  | 74.6  | 2628 |
| TYQRWQFTL   | 9  | 0.0189  | PRPF8   | ENSG00000174231.17 | ENSP00000304350.6  | 123.1 | 7005 |
| EIRDIILGM   | 9  | 17.3556 | PRPF8   | ENSG00000174231.17 | ENSP00000304350.6  | 123.1 | 7005 |
| RYIDRIHIF   | 9  | 0.0010  | PRPF8   | ENSG00000174231.17 | ENSP00000304350.6  | 123.1 | 7005 |
| VYTTTTVHWL  | 9  | 0.0444  | PRPF8   | ENSG00000174231.17 | ENSP00000304350.6  | 123.1 | 7005 |
| RYIDRIHIF   | 10 | 0.0048  | PRPF8   | ENSG00000174231.17 | ENSP00000304350.6  | 123.1 | 7005 |
| RYPTSIASL   | 9  | 0.0318  | BUB3    | ENSG00000154473.18 | ENSP00000357851.5  | 68.7  | 978  |
| RYPTSIASLAF | 11 | 0.0548  | BUB3    | ENSG00000154473.18 | ENSP00000357851.5  | 68.7  | 978  |
| SYTHIQYLF   | 9  | 0.0022  | SH2D3C  | ENSG00000095370.20 | ENSP00000485866.1  | 59.5  | 2100 |
| YYVTELTTHRI | 10 | 0.2118  | GBP1    | ENSG00000117228.10 | ENSP00000359504.4  | 62.9  | 1776 |
| VYGFQWRHF   | 9  | 0.0350  | TYMS    | ENSG00000176890.16 | ENSP00000315644.10 | 67.7  | 939  |
| EVINYEPICY  | 10 | 37.6667 | MYLK    | ENSG00000065534.18 | ENSP00000418335.1  | 104.4 | 5742 |
| IYGLLKNPF   | 9  | 0.1190  | YME1L1  | ENSG00000136758.18 | ENSP00000318480.3  | 54.2  | 2319 |
| KYINTDAKF   | 9  | 0.0121  | TRPC4AP | ENSG00000100991.12 | ENSP00000252015.2  | 64.1  | 2391 |
| TYGRSFTL    | 8  | 0.6139  | CHIT1   | ENSG00000133063.16 | ENSP00000423778.1  | 71.6  | 1161 |
| YAHYHQHF    | 9  | 0.7868  | MOB1A   | ENSG00000114978.18 | ENSP00000379364.3  | 47.2  | 648  |
| VYAHYHQHF   | 10 | 0.0089  | MOB1A   | ENSG00000114978.18 | ENSP00000379364.3  | 47.2  | 648  |
| RYMEVSGNL   | 9  | 0.1194  | SF3A3   | ENSG00000183431.12 | ENSP00000362110.4  | 62.7  | 1503 |

|            |    |         |          |                    |                   |       |      |
|------------|----|---------|----------|--------------------|-------------------|-------|------|
| YYQHIVTTL  | 9  | 0.0054  | PCYOX1   | ENSG00000116005.12 | ENSP00000387654.2 | 44.5  | 1515 |
| TYIESASEL  | 9  | 0.0940  | GALNT14  | ENSG00000158089.15 | ENSP00000385435.1 | 152.7 | 1596 |
| SYILRPVAF  | 9  | 0.0127  | SLC28A1  | ENSG00000156222.12 | ENSP00000286749.3 | 77.2  | 1947 |
| KYPLLLDNI  | 9  | 0.1412  | ARHGEF12 | ENSG00000196914.9  | ENSP00000432984.1 | 52.8  | 4323 |
| SYFDEPVEL  | 9  | 0.0327  | ARFGAP3  | ENSG00000242247.11 | ENSP00000263245.5 | 46.5  | 1548 |
| RYPNRFKLW  | 9  | 0.0463  | CYB5R1   | ENSG00000159348.13 | ENSP00000356218.4 | 62.5  | 915  |
| SYFPTPAAL  | 9  | 0.0414  | FOLR2    | ENSG00000165457.14 | ENSP00000298223.6 | 58.8  | 765  |
| SYIAHLRQI  | 9  | 0.0574  | MSC      | ENSG00000178860.8  | ENSP00000321445.4 | 46.4  | 618  |
| KYPNV DARL | 9  | 0.1058  | UGCG     | ENSG00000148154.10 | ENSP00000363397.3 | 45.5  | 1182 |
| EAILGTIGAR | 10 | 48.0000 | DOCK6    | ENSG00000130158.14 | ENSP00000294618.6 | 104.3 | 6141 |
| VQRLEPVI   | 8  | 18.5526 | PFKFB3   | ENSG00000170525.21 | ENSP00000492001.1 | 72.5  | 1704 |
| VYLIEHPSL  | 9  | 0.0372  | ASPA     | ENSG00000108381.11 | ENSP00000263080.2 | 43.6  | 939  |
| VYLQNSHVL  | 10 | 0.1293  | GPS1     | ENSG00000169727.12 | ENSP00000485035.1 | 83.5  | 1578 |
| VYLPHTTSL  | 9  | 0.0083  | MYLIP    | ENSG00000007944.15 | ENSP00000349298.3 | 50.5  | 1335 |
| YMKHTRLF   | 8  | 0.5788  | FLII     | ENSG00000177731.16 | ENSP00000324573.4 | 128.0 | 3807 |
| EYMKHTRLF  | 9  | 0.0160  | FLII     | ENSG00000177731.16 | ENSP00000324573.4 | 128.0 | 3807 |
| SYQRAFNEF  | 9  | 0.0054  | TNFAIP2  | ENSG00000185215.9  | ENSP00000452634.1 | 112.3 | 1962 |
| EVITAVRKM  | 9  | 8.2245  | COL6A3   | ENSG00000163359.15 | ENSP00000418285.1 | 49.2  | 7710 |
| QYVSASFSL  | 9  | 0.0686  | STOML2   | ENSG00000165283.16 | ENSP00000348886.5 | 113.4 | 1068 |
| EVVQKMTGL  | 9  | 14.5889 | CTSK     | ENSG00000143387.13 | ENSP00000271651.3 | 43.1  | 987  |
| RYLPK LKAF | 9  | 0.0169  | CRY2     | ENSG00000121671.11 | ENSP00000478187.1 | 50.8  | 1842 |
| MYANHFDLL  | 9  | 0.0800  | FMO1     | ENSG0000010932.17  | ENSP00000481732.1 | 84.4  | 1596 |
| VYFSAIQKI  | 9  | 0.0061  | BAIAP2L2 | ENSG00000128298.17 | ENSP00000371085.3 | 44.1  | 1587 |
| IYKSIMEQF  | 9  | 0.0032  | BAIAP2L2 | ENSG00000128298.17 | ENSP00000371085.3 | 44.1  | 1587 |
| HYAYSFKYL  | 9  | 0.1651  | SUPT6H   | ENSG00000109111.15 | ENSP00000319104.6 | 51.0  | 5178 |
| SFLKAKVI   | 8  | 4.5604  | RBM42    | ENSG00000126254.12 | ENSP00000467278.1 | 64.3  | 1374 |
| EVAQLIQGGR | 10 | 60.0000 | MPC1     | ENSG00000060762.19 | ENSP00000354223.6 | 80.4  | 327  |

|             |    |         |          |                    |                   |       |      |
|-------------|----|---------|----------|--------------------|-------------------|-------|------|
| RYQERFKHI   | 9  | 0.0756  | SPRYD3   | ENSG00000167778.9  | ENSP00000301463.4 | 44.7  | 1326 |
| SQANIAQVL   | 9  | 3.4422  | AP1B1    | ENSG00000100280.16 | ENSP00000319361.7 | 90.8  | 2757 |
| VYDVVELKF   | 9  | 0.0183  | CPSF7    | ENSG00000149532.15 | ENSP00000397203.3 | 65.0  | 1386 |
| EVFNKFFKER  | 10 | 25.0833 | SUPT16H  | ENSG00000092201.10 | ENSP00000216297.2 | 51.2  | 3141 |
| TYLPAPEGLKF | 11 | 0.0056  | TNC      | ENSG00000041982.16 | ENSP00000443478.1 | 51.3  | 4692 |
| FYLEGGFSKF  | 10 | 0.0183  | DUSP6    | ENSG00000139318.8  | ENSP00000279488.6 | 48.0  | 1143 |
| RYLNEFEEL   | 9  | 0.0243  | EIF2AK1  | ENSG00000086232.13 | ENSP00000199389.6 | 43.6  | 1890 |
| RYAQNVAFF   | 9  | 0.0039  | ZNF32    | ENSG00000169740.14 | ENSP00000363556.2 | 52.3  | 819  |
| KYKGIFNGF   | 9  | 0.0226  | SLC25A3  | ENSG00000075415.12 | ENSP00000383898.3 | 107.3 | 1083 |
| KYIHSANVL   | 9  | 0.0925  | MAPK1    | ENSG00000100030.14 | ENSP00000215832.6 | 42.8  | 1080 |
| NQYRLIVNV   | 9  | 8.1306  | MCM3     | ENSG00000112118.19 | ENSP00000480987.1 | 45.9  | 2559 |
| RYLEVMRKL   | 9  | 0.0208  | PTPA     | ENSG00000119383.19 | ENSP00000351885.4 | 118.4 | 969  |
| NYADQISRL   | 9  | 0.1401  | MAPK8IP3 | ENSG00000138834.12 | ENSP00000348290.5 | 99.9  | 3990 |
| EQLSILKV    | 8  | 22.4211 | MYH11    | ENSG00000133392.18 | ENSP00000300036.5 | 135.9 | 5916 |
| TQRQVNITV   | 9  | 9.7676  | HACD3    | ENSG00000074696.13 | ENSP00000261875.5 | 40.4  | 1086 |
| LYANMFERL   | 9  | 0.0553  | FKBP4    | ENSG00000004478.8  | ENSP00000001008.4 | 48.5  | 1377 |
| DVISSIRNF   | 9  | 1.7773  | TOMM5    | ENSG00000175768.13 | ENSP00000313584.6 | 40.9  | 153  |
| KYRRYHPLF   | 9  | 0.1047  | ARAP1    | ENSG00000186635.14 | ENSP00000335506.8 | 116.3 | 3615 |
| EMISDEIHER  | 10 | 24.2857 | SH3BP5   | ENSG00000131370.16 | ENSP00000373301.3 | 82.2  | 1365 |
| KYTKNIVSW   | 9  | 0.0096  | ARHGAP29 | ENSG00000137962.13 | ENSP00000260526.6 | 47.5  | 3783 |
| EVATFFAKM   | 9  | 8.7311  | TOP1     | ENSG00000198900.6  | ENSP00000354522.2 | 38.5  | 2295 |
| TYTDRVFFL   | 9  | 0.0326  | PLXNB2   | ENSG00000196576.15 | ENSP00000409171.1 | 401.3 | 5514 |
| YYTDIMHTL   | 9  | 0.0046  | PLXNB2   | ENSG00000196576.15 | ENSP00000409171.1 | 401.3 | 5514 |
| VYVVGTAHF   | 9  | 0.0062  | TRABD    | ENSG00000170638.9  | ENSP00000379171.1 | 52.1  | 1128 |
| YFHPPAHL    | 8  | 0.8542  | MBNL1    | ENSG00000152601.17 | ENSP00000418427.1 | 69.1  | 906  |
| KYFHPPAHL   | 9  | 0.0180  | MBNL1    | ENSG00000152601.17 | ENSP00000418427.1 | 69.1  | 906  |
| QQHVIETLI   | 9  | 7.1052  | CCT5     | ENSG00000150753.12 | ENSP00000280326.4 | 120.4 | 1623 |

|             |    |         |         |                    |                   |       |      |
|-------------|----|---------|---------|--------------------|-------------------|-------|------|
| ETAGRYITY   | 9  | 8.2978  | POLR2E  | ENSG00000099817.12 | ENSP00000478303.1 | 72.6  | 630  |
| IYSIDFTRF   | 9  | 0.0066  | UNC119B | ENSG00000175970.11 | ENSP00000344942.4 | 41.2  | 753  |
| EVVERLLSV   | 9  | 12.5972 | INF2    | ENSG00000203485.13 | ENSP00000376406.3 | 95.6  | 3720 |
| IQHLIPKI    | 8  | 9.3447  | PSME2   | ENSG00000100911.16 | ENSP00000216802.5 | 113.3 | 717  |
| GPREAGLR    | 8  | 80.0000 | CCDC115 | ENSG00000136710.10 | ENSP00000387301.1 | 55.4  | 525  |
| EVGPREAGLR  | 10 | 52.5000 | CCDC115 | ENSG00000136710.10 | ENSP00000387301.1 | 55.4  | 525  |
| DVINPMALR   | 9  | 27.8000 | SART1   | ENSG00000175467.15 | ENSP00000310448.5 | 41.7  | 2400 |
| RYTVGGLETf  | 10 | 0.0291  | PTPN6   | ENSG00000111679.17 | ENSP00000326010.9 | 119.5 | 1785 |
| KYLEMIYSM   | 9  | 0.0251  | IPO7    | ENSG00000205339.10 | ENSP00000369042.3 | 42.5  | 3114 |
| EYAVLTSTI   | 9  | 0.1604  | IRF2    | ENSG00000168310.11 | ENSP00000377218.3 | 44.0  | 1047 |
| ETAPRTIFQR  | 10 | 23.9375 | ATXN10  | ENSG00000130638.17 | ENSP00000252934.4 | 41.2  | 1425 |
| KYLAHLEQL   | 9  | 0.0292  | GBP2    | ENSG00000162645.13 | ENSP00000359497.3 | 89.1  | 1773 |
| RYLTGAWRL   | 9  | 0.0240  | ALG5    | ENSG00000120697.9  | ENSP00000239891.3 | 46.2  | 972  |
| YYEKQFPEI   | 9  | 0.0863  | NCOR2   | ENSG00000196498.13 | ENSP00000400281.2 | 82.0  | 7512 |
| VYPQPGMQRF  | 10 | 0.0053  | BAG3    | ENSG00000151929.9  | ENSP00000358081.3 | 39.7  | 1725 |
| WYMDNPQNL   | 9  | 0.0562  | PLEKHA2 | ENSG00000169499.15 | ENSP00000482228.1 | 49.6  | 1275 |
| TQFLPRTI    | 8  | 6.9179  | PDZD11  | ENSG00000120509.10 | ENSP00000239666.4 | 61.5  | 420  |
| IYIKHPLHF   | 9  | 0.0006  | DNTTIP1 | ENSG00000101457.13 | ENSP00000361705.3 | 40.7  | 987  |
| EYLTKVDKL   | 9  | 0.1835  | CLTC    | ENSG00000141367.11 | ENSP00000376763.1 | 95.7  | 4917 |
| AYVEMLQHL   | 9  | 0.0160  | FGD5    | ENSG00000154783.11 | ENSP00000285046.5 | 40.9  | 4386 |
| KYADAVKNF   | 9  | 0.0051  | RASA3   | ENSG00000185989.11 | ENSP00000335029.7 | 36.7  | 2502 |
| VYAAGSQFHSF | 11 | 0.0123  | GPT     | ENSG00000167701.14 | ENSP00000378408.2 | 66.4  | 1488 |
| RWFDKTLQF   | 9  | 0.0068  | CRAT    | ENSG00000095321.17 | ENSP00000315013.2 | 55.6  | 1878 |
| PADLSRPK    | 8  | 90.0000 | MAP4    | ENSG00000047849.21 | ENSP00000379083.3 | 57.5  | 3405 |
| VYIDRVRSL   | 9  | 0.0290  | LMNA    | ENSG00000160789.20 | ENSP00000357283.4 | 119.4 | 1992 |
| RFIRPMGLRF  | 10 | 0.1038  | NSA2    | ENSG00000164346.10 | ENSP00000483484.1 | 36.5  | 780  |
| KYMPSVKVSVF | 11 | 0.0222  | DDX39A  | ENSG00000123136.14 | ENSP00000242776.3 | 72.0  | 1281 |

|             |    |         |          |                    |                   |       |      |
|-------------|----|---------|----------|--------------------|-------------------|-------|------|
| MYIARQLSF   | 9  | 0.0080  | SBNO2    | ENSG00000064932.16 | ENSP00000400762.1 | 59.0  | 3927 |
| AVIHLALKER  | 10 | 46.0000 | SF3A1    | ENSG00000099995.19 | ENSP00000215793.7 | 76.4  | 2379 |
| VYIHHFDRI   | 9  | 0.0327  | MOB3A    | ENSG00000172081.14 | ENSP00000349575.2 | 61.8  | 651  |
| EVIPPMKEF   | 9  | 1.2290  | NDUFB6   | ENSG00000165264.11 | ENSP00000369176.3 | 40.6  | 384  |
| VYSSAEFHSL  | 10 | 0.1182  | LTBP3    | ENSG00000168056.16 | ENSP00000435276.1 | 208.9 | 3408 |
| QYPVIIHLI   | 9  | 0.0054  | ELOVL1   | ENSG00000066322.15 | ENSP00000361536.3 | 74.1  | 837  |
| DIYSGGGGGSR | 12 | 65.0000 | HNRNPA0  | ENSG00000177733.6  | ENSP00000316042.4 | 34.9  | 915  |
| RYNPENNTW   | 9  | 0.0220  | IVNS1ABP | ENSG00000116679.16 | ENSP00000356468.3 | 535.7 | 1926 |
| VPYPLPKI    | 8  | 9.7088  | NPEPPS   | ENSG00000141279.16 | ENSP00000320324.4 | 60.5  | 2757 |
| ESIHQYLLQR  | 10 | 41.5000 | NPEPPS   | ENSG00000141279.16 | ENSP00000320324.4 | 60.5  | 2757 |
| AIVDVVANR   | 9  | 17.4222 | ANXA7    | ENSG00000138279.16 | ENSP00000362012.4 | 73.9  | 1398 |
| IYAGGIKSI   | 9  | 0.0969  | SLC12A4  | ENSG00000124067.17 | ENSP00000318557.3 | 80.8  | 3255 |
| HVITGLLEHY  | 10 | 18.7632 | SCRN2    | ENSG00000141295.14 | ENSP00000383935.3 | 83.3  | 1134 |
| RYVQQLQRL   | 9  | 0.0226  | MRPL43   | ENSG00000055950.16 | ENSP00000299179.5 | 99.1  | 606  |
| EVNPNTRVM   | 9  | 7.9958  | ORMDL1   | ENSG00000128699.14 | ENSP00000326869.3 | 52.7  | 459  |
| RYLPQTYVV   | 9  | 0.0334  | ITM2A    | ENSG00000078596.11 | ENSP00000362395.2 | 77.3  | 789  |
| AFKHKHHLI   | 9  | 0.6469  | ZEB2     | ENSG00000169554.21 | ENSP00000302501.4 | 72.4  | 3639 |
| HYLDTTTLI   | 9  | 0.0353  | CRKL     | ENSG00000099942.13 | ENSP00000346300.3 | 34.4  | 909  |
| RYFYKVHQL   | 9  | 0.0092  | BSDC1    | ENSG00000160058.18 | ENSP00000397759.2 | 71.8  | 1341 |
| KYVESFRRF   | 9  | 0.0054  | HNMT     | ENSG00000150540.14 | ENSP00000280097.3 | 59.8  | 876  |
| EVMKAVKVG   | 10 | 29.5714 | PEPD     | ENSG00000124299.15 | ENSP00000391890.2 | 89.2  | 1287 |
| QYQKILERL   | 9  | 0.0217  | TAB1     | ENSG00000100324.14 | ENSP00000216160.6 | 36.6  | 1512 |
| RYISQTQGL   | 9  | 0.0723  | HIPK2    | ENSG00000064393.16 | ENSP00000385571.3 | 35.0  | 3594 |
| KYQEIPFYHI  | 10 | 0.0533  | UNC5B    | ENSG00000107731.12 | ENSP00000334329.6 | 34.8  | 2835 |
| NYQKRFQNL   | 9  | 0.0611  | OGFR     | ENSG00000060491.16 | ENSP00000359491.1 | 62.4  | 1875 |
| VYNENLVHMI  | 10 | 0.2172  | BCAS2    | ENSG00000116752.6  | ENSP00000358554.3 | 35.2  | 675  |
| KQALKYFNL   | 9  | 1.2698  | SEL1L    | ENSG00000071537.14 | ENSP00000337053.4 | 40.0  | 2382 |

|             |    |         |         |                    |                   |       |      |
|-------------|----|---------|---------|--------------------|-------------------|-------|------|
| DVVSFLNR    | 9  | 19.4839 | PPP1CB  | ENSG00000213639.10 | ENSP00000351298.2 | 68.6  | 981  |
| NYGRVFSEW   | 9  | 0.0341  | SNX4    | ENSG00000114520.11 | ENSP00000251775.4 | 35.5  | 1350 |
| SYNDYVREF   | 9  | 0.0084  | YTHDC1  | ENSG00000083896.12 | ENSP00000463982.1 | 78.7  | 2205 |
| VWDTAGQEKF  | 10 | 0.2912  | RAN     | ENSG00000132341.12 | ENSP00000446215.1 | 47.3  | 648  |
| KYMDINFDF   | 9  | 0.0063  | MYO1D   | ENSG00000176658.17 | ENSP00000324527.5 | 47.8  | 3018 |
| YGEIFEKF    | 8  | 0.2399  | NDUFC2  | ENSG00000151366.13 | ENSP00000281031.4 | 45.6  | 357  |
| VQPGQNFHMF  | 10 | 0.3125  | PSMA5   | ENSG00000143106.13 | ENSP00000440618.1 | 50.0  | 549  |
| TVQPGQNFHMF | 11 | 0.9652  | PSMA5   | ENSG00000143106.13 | ENSP00000440618.1 | 50.0  | 549  |
| AYFQKPLLL   | 9  | 0.0125  | AGXT2   | ENSG00000113492.14 | ENSP00000231420.6 | 63.0  | 1542 |
| AYARIGNSYF  | 10 | 0.0904  | STIP1   | ENSG00000168439.16 | ENSP00000445957.1 | 62.3  | 1557 |
| AYLEALSHL   | 9  | 0.0271  | PIK3CD  | ENSG00000171608.15 | ENSP00000366563.4 | 38.1  | 3132 |
| RYLDELMKL   | 9  | 0.0132  | IQGAP1  | ENSG00000140575.13 | ENSP00000488618.1 | 132.1 | 3573 |
| AYQDRLAYL   | 9  | 0.1020  | IQGAP1  | ENSG00000140575.13 | ENSP00000488618.1 | 132.1 | 3573 |
| KYGIQMPAF   | 9  | 0.0474  | IQGAP1  | ENSG00000140575.13 | ENSP00000488618.1 | 132.1 | 3573 |
| RYPPDIRATF  | 10 | 0.0042  | SBF1    | ENSG00000100241.21 | ENSP00000370196.2 | 56.3  | 5679 |
| KYLSGIAHF   | 9  | 0.0016  | PMPCA   | ENSG00000165688.12 | ENSP00000360782.3 | 51.8  | 1575 |
| VYGSFASKL   | 9  | 0.0827  | AZIN1   | ENSG00000155096.14 | ENSP00000337180.5 | 38.8  | 1344 |
| TYLMLANHL   | 9  | 0.0856  | GBE1    | ENSG00000114480.13 | ENSP00000410833.2 | 32.5  | 2106 |
| EQPETYKWK   | 9  | 0.2333  | INTS1   | ENSG00000164880.16 | ENSP00000385722.3 | 50.3  | 6570 |
| KYEELFPAF   | 9  | 0.0153  | NAPA    | ENSG00000105402.8  | ENSP00000263354.2 | 73.5  | 885  |
| IYARAANMF   | 9  | 0.0084  | NAPA    | ENSG00000105402.8  | ENSP00000263354.2 | 73.5  | 885  |
| IYTDMGRFTI  | 10 | 0.2109  | NAPA    | ENSG00000105402.8  | ENSP00000263354.2 | 73.5  | 885  |
| AYLHTTTTF   | 9  | 0.0029  | ABCC3   | ENSG00000108846.16 | ENSP00000285238.8 | 154.6 | 4581 |
| HQALLHNKI   | 9  | 3.7262  | ABCC3   | ENSG00000108846.16 | ENSP00000285238.8 | 154.6 | 4581 |
| VYLHLRQTW   | 9  | 0.0164  | SLC44A2 | ENSG00000129353.15 | ENSP00000385135.3 | 146.6 | 2112 |
| EIKERIAKR   | 9  | 22.6842 | BIN2    | ENSG00000110934.11 | ENSP00000445874.1 | 43.9  | 1617 |
| KYGDPGSLF   | 9  | 0.0063  | ITGA6   | ENSG00000091409.15 | ENSP00000406694.1 | 49.9  | 3390 |

|             |    |         |         |                    |                   |       |       |
|-------------|----|---------|---------|--------------------|-------------------|-------|-------|
| STIGETSNR   | 9  | 18.2368 | RBM23   | ENSG00000100461.18 | ENSP00000339220.5 | 49.5  | 1215  |
| KYTKIFNDF   | 9  | 0.0077  | ZMYND11 | ENSG00000015171.19 | ENSP00000487386.1 | 51.1  | 1755  |
| VYVKDLSSF   | 9  | 0.0059  | KIF3B   | ENSG00000101350.8  | ENSP00000364864.3 | 30.3  | 2241  |
| EVFDERAANF  | 10 | 2.5226  | VCL     | ENSG00000035403.17 | ENSP00000211998.4 | 34.7  | 3402  |
| SVIDYQTHFR  | 10 | 13.6036 | TMED7   | ENSG00000134970.14 | ENSP00000405926.3 | 30.7  | 672   |
| SYLEKVVTL   | 9  | 0.0043  | ABI3    | ENSG00000108798.9  | ENSP00000225941.1 | 41.4  | 1098  |
| LLPGKTYSF   | 9  | 0.1344  | FNDC3A  | ENSG00000102531.16 | ENSP00000381362.3 | 32.8  | 3426  |
| EYLKLLHSF   | 9  | 0.0058  | SREBF2  | ENSG00000198911.12 | ENSP00000354476.4 | 41.2  | 3423  |
| YYQNYFEKL   | 9  | 0.0119  | PATL1   | ENSG00000166889.14 | ENSP00000300146.9 | 31.9  | 2310  |
| IYLSKPTHW   | 9  | 0.0061  | POLR2B  | ENSG00000047315.16 | ENSP00000491706.1 | 55.0  | 3297  |
| RYLLKFEQI   | 9  | 0.0315  | POLR2B  | ENSG00000047315.16 | ENSP00000491706.1 | 55.0  | 3297  |
| DVRDRMIHR   | 9  | 26.4000 | ABLIM1  | ENSG00000099204.20 | ENSP00000376679.3 | 38.7  | 1365  |
| KYMDIEFDF   | 9  | 0.0087  | MYO1B   | ENSG00000128641.19 | ENSP00000376132.3 | 50.8  | 3408  |
| KYLEDRGEVTF | 11 | 0.0267  | GRK2    | ENSG00000173020.11 | ENSP00000312262.5 | 100.0 | 2067  |
| RYVVTSSVSW  | 9  | 0.0274  | EIF3B   | ENSG00000106263.18 | ENSP00000354125.4 | 128.9 | 2442  |
| KYIQRQETI   | 9  | 0.0202  | MX1     | ENSG00000157601.14 | ENSP00000381599.3 | 39.8  | 1986  |
| AYAPPPHVI   | 9  | 0.0079  | APOL2   | ENSG00000128335.14 | ENSP00000249066.6 | 38.2  | 1011  |
| NYIKRNWRI   | 9  | 0.0872  | CSE1L   | ENSG00000124207.17 | ENSP00000262982.2 | 32.1  | 2913  |
| SYSGTFHSL   | 9  | 0.0117  | NBPF1   | ENSG00000219481.10 | ENSP00000474456.1 | 50.3  | 3417  |
| VWNPRSHEKL  | 10 | 0.5127  | WDR6    | ENSG00000178252.18 | ENSP00000477389.1 | 60.2  | 3363  |
| TYNRIINQI   | 9  | 0.0240  | ANGPTL2 | ENSG00000136859.10 | ENSP00000362524.3 | 31.1  | 1479  |
| KYFAKHPRL   | 9  | 0.0541  | UTRN    | ENSG00000152818.18 | ENSP00000356515.3 | 43.0  | 10299 |
| EIFDGNVAHI  | 10 | 7.8626  | UTRN    | ENSG00000152818.18 | ENSP00000356515.3 | 43.0  | 10299 |
| RYLGKVLEL   | 9  | 0.0161  | CLUH    | ENSG00000132361.17 | ENSP00000464732.2 | 85.4  | 3753  |
| KFHSEVAKF   | 9  | 0.0743  | GGA2    | ENSG00000103365.15 | ENSP00000311962.4 | 47.0  | 1839  |
| RYIHPQQEAF  | 10 | 0.0198  | CPSF1   | ENSG00000071894.17 | ENSP00000484669.1 | 78.3  | 4329  |
| EIMELDTSGF  | 10 | 9.7265  | CPSF1   | ENSG00000071894.17 | ENSP00000484669.1 | 78.3  | 4329  |

|              |    |         |          |                    |                   |       |      |
|--------------|----|---------|----------|--------------------|-------------------|-------|------|
| IYTDQAGQWRI  | 11 | 0.4904  | C12orf10 | ENSG00000139637.14 | ENSP00000267103.5 | 65.3  | 1128 |
| QYLRNPPKL    | 9  | 0.0404  | SHC1     | ENSG00000160691.18 | ENSP00000357438.4 | 81.5  | 1422 |
| VYPDGIRHI    | 9  | 0.0220  | SF3B3    | ENSG00000189091.13 | ENSP00000305790.5 | 46.1  | 3651 |
| YYFPVKNVI    | 9  | 0.0190  | SF3B3    | ENSG00000189091.13 | ENSP00000305790.5 | 46.1  | 3651 |
| NYISGIQTI    | 9  | 0.0088  | SF3B3    | ENSG00000189091.13 | ENSP00000305790.5 | 46.1  | 3651 |
| EYIPDLYNHF   | 10 | 0.0109  | RABGAP1  | ENSG00000011454.17 | ENSP00000362751.4 | 34.6  | 3207 |
| RYQQWMERF    | 9  | 0.0050  | ELAC2    | ENSG00000006744.19 | ENSP00000463740.2 | 50.2  | 1878 |
| KFMPVSSLI    | 9  | 0.0906  | FTSJ3    | ENSG00000108592.17 | ENSP00000396673.2 | 40.9  | 2541 |
| HYAHLIKTF    | 9  | 0.0078  | DOCK1    | ENSG00000150760.12 | ENSP00000280333.6 | 31.3  | 5595 |
| MYIRYLYKL    | 9  | 0.0257  | DOCK1    | ENSG00000150760.12 | ENSP00000280333.6 | 31.3  | 5595 |
| KYDPNVYSI    | 9  | 0.0092  | ITGAV    | ENSG00000138448.12 | ENSP00000261023.3 | 28.9  | 3144 |
| AYLDALQTL    | 9  | 0.0105  | KANSL3   | ENSG00000114982.19 | ENSP00000499674.1 | 35.4  | 2712 |
| TYMKDLYQL    | 9  | 0.0083  | ARHGAP18 | ENSG00000146376.11 | ENSP00000357131.2 | 27.5  | 1989 |
| EQFKFKNMV    | 9  | 11.4239 | FAM192A  | ENSG00000172775.17 | ENSP00000335808.6 | 51.2  | 762  |
| RQALMPTL     | 8  | 7.1087  | EP300    | ENSG00000100393.13 | ENSP00000263253.7 | 32.9  | 7242 |
| EYVVRTFTL    | 9  | 0.0977  | PTPRK    | ENSG00000152894.14 | ENSP00000357209.4 | 35.9  | 4320 |
| QYNMNFEKL    | 9  | 0.0913  | CASP7    | ENSG00000165806.19 | ENSP00000358324.3 | 36.0  | 909  |
| TYDNVHQQF    | 9  | 0.0055  | ARHGAP24 | ENSG00000138639.18 | ENSP00000378610.2 | 38.6  | 1959 |
| VYSTPTPFF    | 9  | 0.0031  | WAS      | ENSG00000015285.10 | ENSP00000365891.4 | 32.3  | 1506 |
| KYQELQVLF    | 9  | 0.0015  | VPS37B   | ENSG00000139722.7  | ENSP00000267202.2 | 27.9  | 855  |
| MQQILTRV     | 8  | 18.4737 | GNL2     | ENSG00000134697.13 | ENSP00000362153.3 | 33.4  | 2193 |
| EYISKTYKI    | 9  | 0.0142  | GNL2     | ENSG00000134697.13 | ENSP00000362153.3 | 33.4  | 2193 |
| SEFRAFSSFKNR | 12 | 46.0000 | CD58     | ENSG00000116815.16 | ENSP00000358501.5 | 47.5  | 750  |
| QYEEQFVTL    | 9  | 0.0796  | XPO1     | ENSG00000082898.16 | ENSP00000385942.2 | 65.9  | 3213 |
| VYIGKLNMI    | 9  | 0.0190  | XPO1     | ENSG00000082898.16 | ENSP00000385942.2 | 65.9  | 3213 |
| KYVHLFPKL    | 9  | 0.0203  | SNRNP200 | ENSG00000144028.15 | ENSP00000498933.1 | 196.3 | 4125 |
| ETQLPVSEFR   | 9  | 24.0000 | SNRNP200 | ENSG00000144028.15 | ENSP00000498933.1 | 196.3 | 4125 |

|             |    |         |          |                    |                   |       |       |
|-------------|----|---------|----------|--------------------|-------------------|-------|-------|
| FYLPKDAVKHL | 11 | 0.3200  | RASSF1   | ENSG00000068028.17 | ENSP00000333327.3 | 47.2  | 810   |
| YYITTRVQF   | 9  | 0.0072  | FGR      | ENSG00000000938.13 | ENSP00000363115.3 | 46.1  | 1587  |
| NYAWVYYHL   | 9  | 0.0406  | IFIT3    | ENSG00000119917.14 | ENSP00000360876.4 | 43.0  | 1470  |
| IYKDYQYYF   | 9  | 0.0028  | MRC1     | ENSG00000260314.3  | ENSP00000455897.1 | 26.1  | 4368  |
| RYPDSHQLF   | 9  | 0.0020  | G3BP2    | ENSG00000138757.14 | ENSP00000379069.3 | 36.3  | 1446  |
| VYPEKLATKF  | 10 | 0.0074  | ECPAS    | ENSG00000136813.14 | ENSP00000339889.5 | 39.6  | 5517  |
| RWMSQHNRF   | 9  | 0.0504  | PAFAH1B2 | ENSG00000168092.14 | ENSP00000435289.1 | 27.8  | 687   |
| AQLAVTKI    | 8  | 17.6000 | UBR7     | ENSG00000012963.15 | ENSP00000013070.6 | 27.2  | 1275  |
| VYANGIRNI   | 9  | 0.0653  | MARCH6   | ENSG00000145495.16 | ENSP00000274140.4 | 47.1  | 2730  |
| TYKQVVDLI   | 9  | 0.0532  | CYTIP    | ENSG00000115165.10 | ENSP00000264192.3 | 26.4  | 1077  |
| KYHGYPYSF   | 9  | 0.0019  | MAGT1    | ENSG00000102158.19 | ENSP00000478379.1 | 25.7  | 1101  |
| RYSSAFTNRIF | 12 | 0.1923  | MAGT1    | ENSG00000102158.19 | ENSP00000478379.1 | 25.7  | 1101  |
| KYGFQYQL    | 8  | 0.6496  | PLK2     | ENSG00000145632.15 | ENSP00000274289.3 | 101.4 | 2055  |
| QYSNAFDVF   | 9  | 0.0399  | TOB1     | ENSG00000141232.5  | ENSP00000268957.3 | 37.5  | 1035  |
| RYLPDTLLL   | 9  | 0.0071  | COMT     | ENSG00000093010.13 | ENSP00000354511.6 | 62.9  | 813   |
| EQYYVRKV    | 8  | 22.1053 | BICD2    | ENSG00000185963.14 | ENSP00000364662.3 | 31.9  | 2472  |
| HYMSINDSF   | 9  | 0.0118  | BICD2    | ENSG00000185963.14 | ENSP00000364662.3 | 31.9  | 2472  |
| RYFPDRNVALF | 11 | 0.0098  | INPP5E   | ENSG00000148384.13 | ENSP00000360777.3 | 26.5  | 1932  |
| IYSTPLPEKF  | 10 | 0.0051  | KLF3     | ENSG00000109787.13 | ENSP00000261438.5 | 27.8  | 1035  |
| QQWPVRSI    | 8  | 8.4347  | XPO6     | ENSG00000169180.11 | ENSP00000302790.4 | 54.1  | 3375  |
| YYMKDLPTSF  | 10 | 0.0052  | PI4KA    | ENSG00000241973.10 | ENSP00000255882.6 | 60.5  | 6306  |
| SYMPTVSHL   | 9  | 0.0043  | BSCL2    | ENSG00000168000.14 | ENSP00000413209.1 | 61.8  | 1194  |
| AYLRIHAHF   | 9  | 0.0068  | BSCL2    | ENSG00000168000.14 | ENSP00000413209.1 | 61.8  | 1194  |
| WQAKVPQI    | 8  | 6.7285  | DYNC1H1  | ENSG00000197102.12 | ENSP00000348965.4 | 69.9  | 13938 |
| RYKLYQEMF   | 9  | 0.0326  | DYNC1H1  | ENSG00000197102.12 | ENSP00000348965.4 | 69.9  | 13938 |
| ETFDQAMGR   | 10 | 23.7500 | DYNC1H1  | ENSG00000197102.12 | ENSP00000348965.4 | 69.9  | 13938 |
| RYYGNISRF   | 9  | 0.0041  | EHMT2    | ENSG00000204371.11 | ENSP00000364687.4 | 49.1  | 3630  |

|             |    |         |         |                    |                   |       |      |
|-------------|----|---------|---------|--------------------|-------------------|-------|------|
| KYAHMINGF   | 9  | 0.0156  | ADSS    | ENSG00000035687.10 | ENSP00000355493.3 | 27.0  | 1368 |
| EVINRSMDTY  | 10 | 26.1000 | CAMLG   | ENSG00000164615.5  | ENSP00000297156.2 | 32.3  | 888  |
| EVISLINTR   | 9  | 18.1579 | FAF2    | ENSG00000113194.13 | ENSP00000261942.6 | 26.1  | 1335 |
| KYSLIKGNF   | 9  | 0.0796  | S100A8  | ENSG00000143546.10 | ENSP00000357722.3 | 26.9  | 279  |
| LYQHEINLF   | 9  | 0.0061  | CEBPZ   | ENSG00000115816.15 | ENSP00000234170.5 | 26.5  | 3162 |
| VYADQPHIF   | 9  | 0.0016  | ABHD4   | ENSG00000100439.10 | ENSP00000414558.2 | 26.6  | 1026 |
| EQIDKKLER   | 9  | 15.9275 | PTPN12  | ENSG00000127947.16 | ENSP00000248594.6 | 65.8  | 2340 |
| YSAPATLSSR  | 10 | 24.7143 | PDLIM2  | ENSG00000120913.23 | ENSP00000477546.1 | 78.8  | 438  |
| RYGDGGSTF   | 9  | 0.0128  | HNRNPH1 | ENSG00000169045.17 | ENSP00000426275.1 | 311.2 | 1287 |
| EVIVTEVGQR  | 10 | 60.0000 | AKAP12  | ENSG00000131016.17 | ENSP00000253332.1 | 43.4  | 5346 |
| SVVEIASLR   | 9  | 17.9333 | MCRS1   | ENSG00000187778.14 | ENSP00000349640.4 | 62.6  | 1425 |
| LYDPVISKL   | 9  | 0.0417  | MCRS1   | ENSG00000187778.14 | ENSP00000349640.4 | 62.6  | 1425 |
| ETILRTNKR   | 9  | 28.3750 | SH3KBP1 | ENSG00000147010.18 | ENSP00000369020.4 | 36.4  | 1884 |
| ELIQEITQR   | 9  | 20.1111 | RDX     | ENSG00000137710.16 | ENSP00000496503.1 | 41.5  | 1749 |
| KYNLVTHIL   | 9  | 0.0219  | ZNF710  | ENSG00000140548.10 | ENSP00000268154.3 | 28.9  | 1992 |
| LYPDHFHLL   | 9  | 0.0048  | PPP5C   | ENSG00000011485.14 | ENSP00000012443.4 | 52.4  | 1497 |
| KYLTSLQLVQF | 11 | 0.0452  | ELOVL7  | ENSG00000164181.14 | ENSP00000424123.1 | 31.2  | 843  |
| LYTEKFEEF   | 9  | 0.0048  | TXLNA   | ENSG00000084652.16 | ENSP00000362712.3 | 35.0  | 1638 |
| YYLTHGLYL   | 9  | 0.0587  | PIGU    | ENSG00000101464.10 | ENSP00000217446.3 | 25.1  | 1305 |
| AYNAVVRYP   | 9  | 0.0167  | FMNL3   | ENSG00000161791.14 | ENSP00000335655.5 | 44.6  | 3081 |
| MDSSLTRR    | 8  | 58.3333 | FDPS    | ENSG00000160752.14 | ENSP00000391755.1 | 128.1 | 1059 |
| KQPEDYFYL   | 9  | 0.3808  | MYO9B   | ENSG00000099331.13 | ENSP00000471367.1 | 82.2  | 6471 |
| KYMPNVKVAVF | 11 | 0.0325  | DDX39B  | ENSG00000198563.14 | ENSP00000399371.1 | 316.8 | 867  |
| HVPGSPFTAR  | 10 | 16.0364 | FLNA    | ENSG00000196924.17 | ENSP00000358866.3 | 509.3 | 7941 |
| RFIPRENGVYL | 11 | 0.6566  | FLNA    | ENSG00000196924.17 | ENSP00000358866.3 | 509.3 | 7941 |
| VFIDKQTNL   | 9  | 0.2593  | CELF1   | ENSG00000149187.18 | ENSP00000378705.2 | 38.3  | 1455 |
| RYMILGQNGF  | 10 | 0.0911  | PGM5    | ENSG00000154330.13 | ENSP00000379678.1 | 24.0  | 1701 |

|              |    |         |            |                    |                   |       |      |
|--------------|----|---------|------------|--------------------|-------------------|-------|------|
| KYGVHEAIF    | 9  | 0.0971  | PPARD      | ENSG00000112033.14 | ENSP00000310928.4 | 35.9  | 1323 |
| KYFLWEEKF    | 9  | 0.0073  | GRAP       | ENSG00000154016.13 | ENSP00000284154.5 | 25.3  | 651  |
| NYGDQVQHF    | 9  | 0.0077  | GRAP       | ENSG00000154016.13 | ENSP00000284154.5 | 25.3  | 651  |
| RYSdstFTF    | 9  | 0.0014  | PARP8      | ENSG00000151883.18 | ENSP00000422217.2 | 32.1  | 2562 |
| NYTKAMRLF    | 9  | 0.0481  | ADI1       | ENSG00000182551.14 | ENSP00000333666.3 | 39.0  | 537  |
| TWTEVSYTF    | 9  | 0.0087  | FBXO6      | ENSG00000116663.11 | ENSP00000365944.4 | 23.4  | 879  |
| RYLEAGAAGLRW | 12 | 0.2881  | HSPBP1     | ENSG00000133265.11 | ENSP00000467574.1 | 35.5  | 1077 |
| SYNEHWNYL    | 9  | 0.0269  | AC005840.1 | ENSG00000111321.11 | ENSP00000228918.4 | 113.3 | 1305 |
| SVISGISSR    | 9  | 11.0000 | STAG2      | ENSG00000101972.18 | ENSP00000360186.3 | 41.4  | 3693 |
| IYLDTHFRL    | 9  | 0.0074  | ZNFx1      | ENSG00000124201.15 | ENSP00000379412.1 | 28.4  | 5754 |
| LAHQSWALLH   | 10 | 27.3000 | FUT11      | ENSG00000196968.11 | ENSP00000361932.3 | 83.4  | 1476 |
| EYGVIRDVL    | 9  | 0.8919  | H6PD       | ENSG00000049239.12 | ENSP00000366620.1 | 24.1  | 2373 |
| STAPFGLKPR   | 10 | 27.9000 | LRCH1      | ENSG00000136141.15 | ENSP00000308493.5 | 24.2  | 2088 |
| EYGIFNQKI    | 9  | 0.2321  | PYGL       | ENSG00000100504.17 | ENSP00000443787.1 | 58.6  | 2439 |
| SYAPPTDSF    | 9  | 0.0041  | SGK1       | ENSG00000118515.11 | ENSP00000396242.3 | 71.9  | 1335 |
| TYDKGYQF     | 8  | 0.1860  | PEX5       | ENSG00000139197.10 | ENSP00000266564.3 | 45.8  | 1893 |
| EVIDLMIKEY   | 10 | 25.6667 | PHF10      | ENSG00000130024.15 | ENSP00000355743.4 | 31.1  | 1488 |
| VYTVHHVVW    | 9  | 0.0522  | MAST3      | ENSG00000099308.10 | ENSP00000262811.4 | 23.8  | 3927 |
| EVVEDSLRQR   | 10 | 41.5000 | TMX4       | ENSG00000125827.9  | ENSP00000246024.2 | 22.9  | 1047 |
| VYTTNIQEL    | 9  | 0.0248  | LPXN       | ENSG00000110031.12 | ENSP00000378512.2 | 31.2  | 1158 |
| RYVPRASYF    | 9  | 0.0061  | CCND3      | ENSG00000112576.12 | ENSP00000397545.2 | 41.1  | 660  |
| TYLPTSPLL    | 9  | 0.0084  | NRDC       | ENSG00000078618.21 | ENSP00000262679.8 | 82.1  | 3453 |
| RWFTHASPTL   | 10 | 0.5035  | RRM1       | ENSG00000167325.15 | ENSP00000300738.5 | 28.4  | 2376 |
| QYTHKIYHL    | 9  | 0.0221  | PITPNA     | ENSG00000174238.14 | ENSP00000316809.7 | 45.1  | 810  |
| RYVMTTTL     | 9  | 0.0529  | EIF2S1     | ENSG00000134001.13 | ENSP00000256383.4 | 36.5  | 945  |
| RYKAPFHQL    | 9  | 0.0113  | SMARCA5    | ENSG00000153147.6  | ENSP00000283131.3 | 22.8  | 3156 |
| KYGMVTYLL    | 9  | 0.0229  | GPAT4      | ENSG00000158669.11 | ENSP00000380184.3 | 54.1  | 1368 |

|             |    |         |          |                    |                   |      |      |
|-------------|----|---------|----------|--------------------|-------------------|------|------|
| HYTIVFNTF   | 9  | 0.0053  | ATP2B4   | ENSG00000058668.14 | ENSP00000340930.2 | 27.7 | 3510 |
| IYQYIQSRF   | 9  | 0.0057  | DYRK1A   | ENSG00000157540.21 | ENSP00000495571.1 | 34.4 | 2175 |
| ETVNLRLSLGF | 10 | 10.4237 | CRYBG1   | ENSG00000112297.15 | ENSP00000358062.3 | 22.8 | 5169 |
| RMPNSPAPHF  | 10 | 0.2059  | CRYBG1   | ENSG00000112297.15 | ENSP00000358062.3 | 22.8 | 5169 |
| VYLPNINKI   | 9  | 0.0031  | RHOBTB1  | ENSG00000072422.17 | ENSP00000350595.4 | 31.4 | 2088 |
| RYTIVQQQI   | 9  | 0.0257  | TUBGCP2  | ENSG00000130640.13 | ENSP00000252936.3 | 64.8 | 2706 |
| SQRPIQMV    | 8  | 18.9211 | EHD3     | ENSG00000013016.16 | ENSP00000327116.5 | 21.8 | 1605 |
| YLNHWNHF    | 8  | 0.5572  | FN3KRP   | ENSG00000141560.15 | ENSP00000269373.6 | 36.7 | 927  |
| HYLNHWNHF   | 9  | 0.0057  | FN3KRP   | ENSG00000141560.15 | ENSP00000269373.6 | 36.7 | 927  |
| LYIDEAHSI   | 9  | 0.0215  | SPTLC2   | ENSG00000100596.6  | ENSP00000216484.2 | 22.7 | 1686 |
| LYMRIRDNW   | 9  | 0.0883  | SPTLC2   | ENSG00000100596.6  | ENSP00000216484.2 | 22.7 | 1686 |
| SYVQVTSNF   | 9  | 0.0048  | AFF4     | ENSG00000072364.13 | ENSP00000265343.5 | 31.9 | 3489 |
| SYSSTFHSL   | 9  | 0.0086  | NBPF15   | ENSG00000266338.6  | ENSP00000463178.1 | 36.8 | 2010 |
| VYTTMAEHF   | 9  | 0.0049  | TSPAN1   | ENSG00000117472.10 | ENSP00000361072.1 | 46.3 | 723  |
| RYPPKSGNYF  | 10 | 0.0139  | MGRN1    | ENSG00000102858.13 | ENSP00000262370.6 | 51.0 | 1728 |
| HQLPLPHNV   | 9  | 1.7648  | HIF1A    | ENSG00000100644.17 | ENSP00000323326.6 | 57.0 | 2205 |
| VYTVVSSHEQF | 11 | 0.0653  | ITGAX    | ENSG00000140678.16 | ENSP00000268296.4 | 62.4 | 3489 |
| SYLSHSEQLVF | 11 | 0.0506  | TMEM106A | ENSG00000184988.8  | ENSP00000483246.1 | 25.8 | 786  |
| PYHPHPHVF   | 9  | 0.0090  | FOXN3    | ENSG00000053254.15 | ENSP00000343288.4 | 28.3 | 1470 |
| YYIRGATTF   | 10 | 0.0094  | DPT      | ENSG00000143196.5  | ENSP00000356791.3 | 21.3 | 603  |
| RYLPTGSFPF  | 10 | 0.0172  | TUSC3    | ENSG00000104723.20 | ENSP00000424544.1 | 26.5 | 1044 |
| VYKENLVDGF  | 10 | 0.1036  | NELFE    | ENSG00000204356.14 | ENSP00000364574.5 | 87.1 | 1161 |
| EYNTVASKF   | 9  | 0.0450  | PARP14   | ENSG00000173193.15 | ENSP00000420649.1 | 46.2 | 4563 |
| VYVGAVNRI   | 9  | 0.0502  | PLXNA1   | ENSG00000114554.11 | ENSP00000377061.2 | 23.3 | 5688 |
| RYLPKGFLNQF | 11 | 0.0095  | PTK2     | ENSG00000169398.19 | ENSP00000341189.3 | 92.3 | 3195 |
| HGMIMLRI    | 8  | 23.6875 | ARCN1    | ENSG00000095139.14 | ENSP00000264028.4 | 27.8 | 1533 |
| EYMEHTYLI   | 9  | 0.0138  | OSBPL1A  | ENSG00000141447.18 | ENSP00000382372.3 | 28.2 | 1311 |

|            |    |         |          |                    |                   |      |       |
|------------|----|---------|----------|--------------------|-------------------|------|-------|
| RYSVFFQSL  | 9  | 0.0221  | PSMD6    | ENSG00000163636.10 | ENSP00000295901.4 | 33.3 | 1167  |
| VGARIYHTI  | 9  | 1.7211  | MGST1    | ENSG00000008394.13 | ENSP00000379513.3 | 98.3 | 465   |
| AYIERMNYI  | 9  | 0.0535  | FYN      | ENSG00000010810.17 | ENSP00000357667.4 | 55.2 | 1602  |
| YYITTRAQF  | 9  | 0.0132  | FYN      | ENSG00000010810.17 | ENSP00000357667.4 | 55.2 | 1602  |
| DIPIHNALR  | 9  | 31.8333 | GUCY1A1  | ENSG00000164116.16 | ENSP00000377418.3 | 35.3 | 1296  |
| KFSNVTMLF  | 9  | 0.0142  | GUCY1A1  | ENSG00000164116.16 | ENSP00000377418.3 | 35.3 | 1296  |
| LYSSKLYRF  | 9  | 0.0036  | KCTD20   | ENSG00000112078.14 | ENSP00000412205.2 | 34.5 | 759   |
| SYMLVNENRF | 10 | 0.0500  | LDOC1    | ENSG00000182195.8  | ENSP00000359557.2 | 24.8 | 438   |
| LYGKIAEAF  | 9  | 0.0168  | GIPC1    | ENSG00000123159.16 | ENSP00000376753.3 | 77.8 | 999   |
| VYAAQPHVI  | 9  | 0.0201  | FAM168A  | ENSG00000054965.10 | ENSP00000064778.4 | 23.4 | 732   |
| KYAMMFAEL  | 9  | 0.1095  | HUWE1    | ENSG00000086758.16 | ENSP00000479451.1 | 60.9 | 13095 |
| GYASRFIVI  | 9  | 0.2298  | RPIA     | ENSG00000153574.9  | ENSP00000283646.3 | 20.5 | 933   |
| IQRIMESV   | 9  | 9.6147  | SKIV2L   | ENSG00000204351.12 | ENSP00000364543.2 | 65.6 | 3738  |
| SFSPKTYSF  | 9  | 0.0057  | PIK3C2A  | ENSG00000011405.13 | ENSP00000265970.6 | 22.9 | 5058  |
| RYMQWRETM  | 9  | 0.0438  | ITPKC    | ENSG00000086544.3  | ENSP00000263370.1 | 20.9 | 2049  |
| VYITRAQLM  | 9  | 0.0807  | NACC1    | ENSG00000160877.6  | ENSP00000292431.3 | 25.0 | 1581  |
| GYIERPQLI  | 9  | 0.0382  | TENT2    | ENSG00000164329.13 | ENSP00000421966.1 | 39.4 | 1323  |
| KYPVLVERI  | 9  | 0.0235  | ARHGEF28 | ENSG00000214944.9  | ENSP00000296799.4 | 35.3 | 4176  |
| FTMQQVVS   | 9  | 13.4955 | TNFSF13  | ENSG00000161955.16 | ENSP00000379794.4 | 38.2 | 741   |
| RYPLLLQKI  | 9  | 0.0121  | ARHGEF37 | ENSG00000183111.12 | ENSP00000328083.6 | 20.9 | 2025  |
| RYKEKVAEL  | 9  | 0.0759  | KAT7     | ENSG00000136504.12 | ENSP00000409477.2 | 28.6 | 1275  |
| TYLDKVENI  | 9  | 0.0127  | IFIT1    | ENSG00000185745.10 | ENSP00000360869.3 | 20.3 | 1434  |
| GQFKIGLI   | 8  | 21.0000 | VPS29    | ENSG00000111237.18 | ENSP00000447058.1 | 66.4 | 546   |
| AYSHLRYVF  | 9  | 0.0231  | FAT1     | ENSG00000083857.14 | ENSP00000406229.2 | 68.0 | 13764 |
| VYVQNVVKL  | 9  | 0.0130  | AP3D1    | ENSG00000065000.18 | ENSP00000495274.1 | 58.2 | 3645  |
| NYLNHWNHF  | 9  | 0.0085  | FN3K     | ENSG00000167363.14 | ENSP00000300784.7 | 31.5 | 927   |
| RYLVEVEEL  | 9  | 0.0556  | PDRG1    | ENSG00000088356.6  | ENSP00000202017.4 | 20.0 | 399   |

|             |    |         |          |                    |                   |       |       |
|-------------|----|---------|----------|--------------------|-------------------|-------|-------|
| YLGLTNELF   | 9  | 0.9426  | PNPLA6   | ENSG00000032444.16 | ENSP00000473211.1 | 68.3  | 4095  |
| SQFELLKV    | 8  | 14.7222 | RPS6KA2  | ENSG00000071242.12 | ENSP00000422435.1 | 22.6  | 2274  |
| QYFPKAPF    | 9  | 0.0029  | USP48    | ENSG00000090686.15 | ENSP00000363864.3 | 49.3  | 1563  |
| DYKTVNLL    | 9  | 0.3204  | USP48    | ENSG00000090686.15 | ENSP00000363864.3 | 49.3  | 1563  |
| YYTPITPHL   | 9  | 0.0047  | PTBP3    | ENSG00000119314.15 | ENSP00000363375.1 | 22.8  | 1572  |
| KYTTLIAKL   | 9  | 0.0439  | TES      | ENSG00000135269.18 | ENSP00000350937.4 | 27.4  | 1263  |
| SYLKQLPHF   | 9  | 0.0023  | SNRNP200 | ENSG00000144028.15 | ENSP00000317123.5 | 196.3 | 6408  |
| VYMDWYEKF   | 9  | 0.0007  | SNRNP200 | ENSG00000144028.15 | ENSP00000317123.5 | 196.3 | 6408  |
| TYKVISNEF   | 9  | 0.0172  | UBE3A    | ENSG00000114062.20 | ENSP00000486349.1 | 28.6  | 2556  |
| EVIKRFIQY   | 9  | 5.4624  | EIF3L    | ENSG00000100129.18 | ENSP00000499067.1 | 258.9 | 1692  |
| RYQDIHHSI   | 9  | 0.0020  | BAZ1B    | ENSG00000009954.11 | ENSP00000342434.4 | 31.8  | 4449  |
| LYMVNGPPHF  | 10 | 0.0245  | EIF2A    | ENSG00000144895.12 | ENSP00000417229.1 | 45.6  | 1755  |
| YYSPHGHLVL  | 11 | 0.1875  | EIF2A    | ENSG00000144895.12 | ENSP00000417229.1 | 45.6  | 1755  |
| YLKTVDKF    | 8  | 0.5929  | TRAPPC2B | ENSG00000256060.2  | ENSP00000442778.1 | 20.9  | 420   |
| MYLKTVDKF   | 9  | 0.0039  | TRAPPC2B | ENSG00000256060.2  | ENSP00000442778.1 | 20.9  | 420   |
| TYQVLAVTF   | 9  | 0.0055  | SNRNP40  | ENSG00000060688.13 | ENSP00000263694.4 | 26.1  | 1071  |
| VYIEKNDKL   | 9  | 0.0512  | ERBB3    | ENSG00000065361.15 | ENSP00000448483.1 | 96.3  | 2763  |
| HYGKVYLL    | 8  | 0.3747  | VPS41    | ENSG00000006715.16 | ENSP00000309457.4 | 25.8  | 2562  |
| RYVEIVSQF   | 9  | 0.0015  | VPS41    | ENSG00000006715.16 | ENSP00000309457.4 | 25.8  | 2562  |
| PYPPPPPEF   | 9  | 0.0069  | WBP2     | ENSG00000132471.12 | ENSP00000466999.1 | 89.8  | 693   |
| EYQKVGQSF   | 9  | 0.0225  | SNX18    | ENSG00000178996.14 | ENSP00000370817.4 | 19.6  | 1872  |
| VYQEMPAQL   | 9  | 0.0119  | BCKDHA   | ENSG00000248098.12 | ENSP00000416000.2 | 66.7  | 1344  |
| NYIKSLSSF   | 9  | 0.0075  | SMG1     | ENSG00000157106.16 | ENSP00000402515.2 | 27.1  | 10983 |
| RYDNVTILF   | 9  | 0.0074  | GUCY1B1  | ENSG00000061918.13 | ENSP00000425065.1 | 40.2  | 1653  |
| EVVTVGIGQR  | 10 | 45.5000 | GUCY1B1  | ENSG00000061918.13 | ENSP00000425065.1 | 40.2  | 1653  |
| VYDITRETF   | 10 | 0.1019  | RAB2B    | ENSG00000129472.15 | ENSP00000380869.1 | 28.2  | 648   |
| DPASLPRVLRV | 11 | 28.1250 | THEMIS2  | ENSG00000130775.16 | ENSP00000363031.3 | 49.3  | 1929  |

|              |    |         |         |                    |                   |       |      |
|--------------|----|---------|---------|--------------------|-------------------|-------|------|
| EYLIKVNEI    | 9  | 0.1539  | ASAP2   | ENSG00000151693.11 | ENSP00000281419.3 | 27.8  | 3018 |
| QYTQALEKF    | 9  | 0.0092  | ASAP2   | ENSG00000151693.11 | ENSP00000281419.3 | 27.8  | 3018 |
| EIISEVQRM    | 9  | 8.8803  | ASAP2   | ENSG00000151693.11 | ENSP00000281419.3 | 27.8  | 3018 |
| PYNPLWAQL    | 9  | 0.0583  | FNIP2   | ENSG00000052795.13 | ENSP00000264433.6 | 28.8  | 3342 |
| AQRAFILTV    | 9  | 6.4542  | CABIN1  | ENSG00000099991.18 | ENSP00000263119.5 | 52.5  | 6660 |
| VYAQVARLF    | 9  | 0.0034  | SIN3A   | ENSG00000169375.15 | ENSP00000378403.4 | 28.1  | 3819 |
| EVIHRKALQR   | 10 | 46.0000 | SIN3A   | ENSG00000169375.15 | ENSP00000378403.4 | 28.1  | 3819 |
| AQHKLAVAV    | 9  | 8.6933  | TCF25   | ENSG00000141002.20 | ENSP00000457329.1 | 192.2 | 795  |
| TYMPHVHIL    | 9  | 0.0026  | FBXO38  | ENSG00000145868.16 | ENSP00000342023.5 | 24.8  | 3564 |
| NYLSHHLTI    | 9  | 0.0216  | PAIP1   | ENSG00000172239.14 | ENSP00000425675.1 | 49.6  | 600  |
| KYVDKLEKI    | 9  | 0.0196  | USP5    | ENSG00000111667.13 | ENSP00000373883.5 | 43.7  | 2505 |
| FVIDAVRTK    | 9  | 21.2273 | EIF3M   | ENSG00000149100.13 | ENSP00000436049.1 | 37.9  | 1122 |
| VWNPRTHQF    | 9  | 0.0075  | ATP1B2  | ENSG00000129244.9  | ENSP00000250111.4 | 18.8  | 870  |
| KYLGQLHYL    | 9  | 0.0108  | PTPN23  | ENSG00000076201.15 | ENSP00000265562.4 | 20.6  | 4908 |
| YQIAVTKV     | 8  | 8.7479  | SMC1A   | ENSG00000072501.17 | ENSP00000323421.3 | 42.7  | 3699 |
| QQSVLQRI     | 8  | 15.8406 | SMC1A   | ENSG00000072501.17 | ENSP00000323421.3 | 42.7  | 3699 |
| KYPNVFKKI    | 9  | 0.0209  | AHCYL1  | ENSG00000168710.18 | ENSP00000377238.4 | 45.2  | 1449 |
| RYLLFARQF    | 9  | 0.0237  | MCM6    | ENSG00000076003.5  | ENSP00000264156.2 | 18.6  | 2463 |
| KYIQKPGLL    | 9  | 0.0906  | PAQR7   | ENSG00000182749.5  | ENSP00000363414.3 | 18.4  | 1038 |
| KYFSDGSSNTF  | 11 | 0.0197  | BTBD3   | ENSG00000132640.15 | ENSP00000483520.1 | 22.7  | 1383 |
| SYLNTVERW    | 9  | 0.0099  | KLHL5   | ENSG00000109790.16 | ENSP00000425512.1 | 39.8  | 846  |
| LYPPRQPTF    | 9  | 0.0027  | SIGLEC1 | ENSG00000088827.12 | ENSP00000341141.4 | 25.1  | 5127 |
| SYAPRHVTL    | 9  | 0.0112  | SIGLEC1 | ENSG00000088827.12 | ENSP00000341141.4 | 25.1  | 5127 |
| NQTPLPLI     | 8  | 9.3325  | TAF9    | ENSG00000273841.5  | ENSP00000370193.1 | 33.1  | 792  |
| IYGPIESTI    | 9  | 0.0192  | CPA3    | ENSG00000163751.4  | ENSP00000296046.3 | 18.2  | 1251 |
| RQPSLFYHL    | 9  | 0.2162  | MAP3K5  | ENSG00000197442.10 | ENSP00000351908.4 | 18.4  | 4122 |
| VYIPMSPGAHFF | 12 | 0.0076  | GAB2    | ENSG00000033327.13 | ENSP00000354952.4 | 18.7  | 2028 |

|             |    |         |         |                    |                   |      |      |
|-------------|----|---------|---------|--------------------|-------------------|------|------|
| EYVKQTWNL   | 9  | 0.0598  | SYK     | ENSG00000165025.15 | ENSP00000364898.1 | 25.8 | 1905 |
| KYMCLRDFE   | 9  | 0.0160  | GLB1L2  | ENSG00000149328.14 | ENSP00000344659.6 | 24.8 | 1908 |
| RYPNSHTHYF  | 10 | 0.0083  | CNOT1   | ENSG00000125107.18 | ENSP00000320949.5 | 58.7 | 7128 |
| RYFDHALTL   | 9  | 0.0072  | FAM91A1 | ENSG00000176853.16 | ENSP00000429491.1 | 30.9 | 2367 |
| TYLKAVKLF   | 9  | 0.0042  | IREB2   | ENSG00000136381.13 | ENSP00000258886.8 | 20.8 | 2889 |
| EVAQFLTGR   | 9  | 20.5556 | DES11   | ENSG00000100418.8  | ENSP00000263256.6 | 21.2 | 504  |
| RYLNSQQQYF  | 10 | 0.0203  | NFRKB   | ENSG00000170322.14 | ENSP00000400476.2 | 21.9 | 3897 |
| KYITKSFNF   | 9  | 0.0024  | PARN    | ENSG00000140694.17 | ENSP00000498650.1 | 28.2 | 1743 |
| KYITKSFNFY  | 10 | 0.5365  | PARN    | ENSG00000140694.17 | ENSP00000498650.1 | 28.2 | 1743 |
| FTAPSTVGKR  | 10 | 27.5000 | PARN    | ENSG00000140694.17 | ENSP00000498650.1 | 28.2 | 1743 |
| VFTPVVQRI   | 9  | 0.0740  | CMIP    | ENSG00000153815.16 | ENSP00000478272.1 | 37.3 | 1758 |
| KYVENFGLI   | 9  | 0.1207  | SPCS2   | ENSG00000118363.12 | ENSP00000263672.6 | 38.6 | 678  |
| VYVAALKTL   | 9  | 0.0519  | MAP3K1  | ENSG00000095015.6  | ENSP00000382423.3 | 20.0 | 4536 |
| ESYQMGHMRR  | 10 | 16.4727 | ADAM10  | ENSG00000137845.15 | ENSP00000260408.3 | 23.1 | 2244 |
| SVIDGRFEGF  | 10 | 2.2240  | ADAM10  | ENSG00000137845.15 | ENSP00000260408.3 | 23.1 | 2244 |
| AYLITLQKF   | 9  | 0.0754  | CYFIP1  | ENSG00000273749.5  | ENSP00000481038.1 | 76.5 | 3759 |
| RYVFQSENTF  | 10 | 0.0357  | SUFU    | ENSG00000107882.11 | ENSP00000358918.3 | 19.1 | 1452 |
| IYIINVHSM   | 9  | 0.0272  | DENND3  | ENSG00000105339.10 | ENSP00000410594.1 | 80.5 | 3438 |
| SQALILKI    | 8  | 9.8147  | NUP188  | ENSG00000095319.14 | ENSP00000361658.2 | 26.2 | 5247 |
| YYISPRLTF   | 9  | 0.0026  | SLA     | ENSG00000155926.14 | ENSP00000378759.3 | 41.1 | 879  |
| LYLLNTTKL   | 9  | 0.0714  | MLH1    | ENSG00000076242.14 | ENSP00000398272.2 | 24.5 | 1545 |
| AYRRIFQKF   | 9  | 0.0296  | MYO1E   | ENSG00000157483.8  | ENSP00000288235.4 | 23.4 | 3324 |
| RYAILTKATW  | 10 | 0.1595  | MYO1E   | ENSG00000157483.8  | ENSP00000288235.4 | 23.4 | 3324 |
| RYITKGNLF   | 9  | 0.0081  | PPP4R3B | ENSG00000275052.5  | ENSP00000484116.1 | 33.7 | 2451 |
| DVAQWNIGSLR | 11 | 44.0000 | KDM4B   | ENSG00000127663.15 | ENSP00000440495.1 | 30.2 | 3390 |
| IYIDRFEDL   | 9  | 0.0541  | ARL14EP | ENSG00000152219.5  | ENSP00000282032.3 | 20.5 | 780  |
| TYLIQHQQKI  | 9  | 0.0253  | ZNF189  | ENSG00000136870.10 | ENSP00000363995.3 | 26.5 | 1836 |

|             |    |         |         |                     |                    |       |      |
|-------------|----|---------|---------|---------------------|--------------------|-------|------|
| IYQKAFDLI   | 9  | 0.0330  | KPNA6   | ENSG00000025800.14  | ENSP000000362728.3 | 18.4  | 1608 |
| VFIGTGHLI   | 9  | 0.1314  | LRRK2   | ENSG000000188906.16 | ENSP000000341930.2 | 56.5  | 3813 |
| SYLSRLQYF   | 9  | 0.0028  | IQGAP2  | ENSG000000145703.16 | ENSP000000274364.6 | 19.3  | 4725 |
| KYQDILNEI   | 9  | 0.0182  | IQGAP2  | ENSG000000145703.16 | ENSP000000274364.6 | 19.3  | 4725 |
| TYPEVKKNL   | 9  | 0.0417  | IQGAP2  | ENSG000000145703.16 | ENSP000000274364.6 | 19.3  | 4725 |
| EVFPEHLARF  | 10 | 0.4834  | LATS2   | ENSG000000150457.9  | ENSP000000372035.4 | 17.4  | 3264 |
| QQFKILNV    | 8  | 15.6812 | UPF2    | ENSG000000151461.20 | ENSP000000380244.2 | 18.5  | 3816 |
| RYPSSLWRRL  | 9  | 0.0443  | SMARCB1 | ENSG000000099956.19 | ENSP000000383984.3 | 48.1  | 1128 |
| TYIPVPAKI   | 9  | 0.0036  | ST3GAL1 | ENSG00000008513.16  | ENSP000000430515.1 | 26.3  | 1020 |
| VYPESFREL   | 9  | 0.0197  | ST3GAL1 | ENSG00000008513.16  | ENSP000000430515.1 | 26.3  | 1020 |
| EVVGIIESR   | 9  | 24.0000 | NUP160  | ENSG000000030066.13 | ENSP000000367721.2 | 28.4  | 4308 |
| VYAILTHGI   | 9  | 0.0592  | PRPS1   | ENSG000000147224.11 | ENSP000000496286.1 | 32.1  | 963  |
| VYVKHSISF   | 9  | 0.0038  | AP3M1   | ENSG000000185009.12 | ENSP000000347408.4 | 20.5  | 1254 |
| EYIRSLNQF   | 9  | 0.0080  | RMC1    | ENSG000000141452.9  | ENSP000000467007.1 | 31.4  | 1827 |
| RYQRLYVKF   | 9  | 0.0045  | PRR12   | ENSG000000126464.14 | ENSP000000394510.1 | 19.7  | 6108 |
| TAEQIRLAQM  | 10 | 27.1000 | UBAP2L  | ENSG000000143569.19 | ENSP000000271877.8 | 88.7  | 3237 |
| IITPIHEQW   | 9  | 0.5891  | PSMF1   | ENSG000000125818.18 | ENSP000000246015.4 | 37.6  | 789  |
| KYVERIHUI   | 9  | 0.0052  | HMOX2   | ENSG000000103415.12 | ENSP000000394103.3 | 46.0  | 948  |
| WVIGSVVAR   | 9  | 32.6000 | GART    | ENSG000000159131.17 | ENSP000000371236.4 | 31.2  | 3030 |
| VYIHPSSALF  | 10 | 0.0059  | DHX8    | ENSG000000067596.11 | ENSP000000262415.2 | 26.5  | 3660 |
| LYDIVFKHF   | 9  | 0.0202  | SP100   | ENSG000000067066.17 | ENSP000000386427.1 | 95.2  | 2064 |
| RYLSKATTL   | 9  | 0.0202  | CDC16   | ENSG000000130177.16 | ENSP000000252458.6 | 103.0 | 1425 |
| YSHVIQKL    | 8  | 1.0537  | SDS     | ENSG000000135094.11 | ENSP000000257549.4 | 21.2  | 984  |
| VYSHVIQKL   | 9  | 0.0033  | SDS     | ENSG000000135094.11 | ENSP000000257549.4 | 21.2  | 984  |
| VYSHVIQKLQL | 11 | 0.2220  | SDS     | ENSG000000135094.11 | ENSP000000257549.4 | 21.2  | 984  |
| RQHEIVLKV   | 9  | 2.7243  | NUP133  | ENSG000000069248.12 | ENSP000000261396.3 | 18.0  | 3468 |
| IYQDSFEQRF  | 10 | 0.0057  | CUL4B   | ENSG000000158290.16 | ENSP000000360373.5 | 32.4  | 2685 |

|             |    |         |          |                    |                   |       |      |
|-------------|----|---------|----------|--------------------|-------------------|-------|------|
| VGYLVRV     | 8  | 26.9000 | FZD8     | ENSG00000177283.7  | ENSP00000363826.1 | 16.1  | 2082 |
| RYVEQSNLM   | 9  | 0.1373  | FKBP15   | ENSG00000119321.9  | ENSP00000238256.3 | 23.3  | 3657 |
| YYAEVETRI   | 9  | 0.0558  | EXOC2    | ENSG00000112685.14 | ENSP00000230449.4 | 17.0  | 2772 |
| PYNPILGETF  | 10 | 0.0268  | OSBPL8   | ENSG00000091039.17 | ENSP00000261183.3 | 22.5  | 2667 |
| ESVGGRVAER  | 10 | 53.7500 | LIMA1    | ENSG00000050405.13 | ENSP00000448779.1 | 44.4  | 1800 |
| KQQLWHLF    | 9  | 0.1720  | C16orf72 | ENSG00000182831.12 | ENSP00000331720.7 | 24.7  | 825  |
| DVITDSPTHKR | 11 | 28.7500 | C16orf72 | ENSG00000182831.12 | ENSP00000331720.7 | 24.7  | 825  |
| DLIGQDLNSR  | 10 | 42.5000 | FBRS     | ENSG00000156860.15 | ENSP00000348489.5 | 34.9  | 2940 |
| VYVKHNISF   | 9  | 0.0059  | AP3M2    | ENSG00000070718.12 | ENSP00000428787.1 | 20.4  | 1254 |
| QQLVSELI    | 9  | 5.8896  | ARHGEF40 | ENSG00000165801.10 | ENSP00000298694.4 | 52.3  | 4557 |
| DYGEINQLL   | 9  | 0.2159  | SESNI    | ENSG00000080546.13 | ENSP00000349061.7 | 33.2  | 1476 |
| KYSEVFEAI   | 9  | 0.0179  | CSNK2A1  | ENSG00000101266.19 | ENSP00000493931.1 | 39.6  | 1062 |
| RYFKGPPELL  | 9  | 0.0100  | CSNK2A1  | ENSG00000101266.19 | ENSP00000493931.1 | 39.6  | 1062 |
| EVFDHMMKR   | 9  | 13.0631 | USP9X    | ENSG00000124486.13 | ENSP00000367558.2 | 26.1  | 7662 |
| EVFDHMMKRM  | 10 | 14.7556 | USP9X    | ENSG00000124486.13 | ENSP00000367558.2 | 26.1  | 7662 |
| AYSAKIALF   | 9  | 0.0062  | DPYD     | ENSG00000188641.13 | ENSP00000359211.3 | 16.9  | 3075 |
| IYAPPLPSL   | 9  | 0.0054  | AKAP1    | ENSG00000121057.13 | ENSP00000337736.3 | 24.6  | 2709 |
| EVIEQIENL   | 9  | 5.2494  | NKTR     | ENSG00000114857.18 | ENSP00000232978.8 | 43.2  | 4386 |
| TYQNDIALI   | 9  | 0.1291  | CFI      | ENSG00000205403.13 | ENSP00000378131.3 | 116.8 | 1773 |
| GQWEVKKI    | 8  | 18.6053 | SEC13    | ENSG00000157020.18 | ENSP00000312122.4 | 55.0  | 966  |
| RYFKTPRKF   | 9  | 0.0066  | CIZ1     | ENSG00000148337.21 | ENSP00000398011.1 | 93.0  | 2460 |
| EVIDFSHGL   | 9  | 5.1162  | ABHD17A  | ENSG00000129968.15 | ENSP00000292577.6 | 56.8  | 930  |
| PYTKVEESF   | 9  | 0.0412  | ALG12    | ENSG00000182858.14 | ENSP00000333813.5 | 18.5  | 1464 |
| IYNKVTPTF   | 9  | 0.0011  | SPRED1   | ENSG00000166068.13 | ENSP00000299084.4 | 17.5  | 1332 |
| IWISKLPHF   | 9  | 0.0086  | TDRD7    | ENSG00000196116.8  | ENSP00000347444.4 | 16.9  | 3294 |
| YYQSSVQYL   | 9  | 0.0083  | DNAAF5   | ENSG00000164818.16 | ENSP00000384884.3 | 28.0  | 840  |
| EQYRQVISV   | 9  | 8.4538  | VPS11    | ENSG00000160695.14 | ENSP00000481126.1 | 58.0  | 2823 |

|             |    |         |          |                    |                   |       |      |
|-------------|----|---------|----------|--------------------|-------------------|-------|------|
| SVIEAVAHF   | 9  | 0.4722  | UBR2     | ENSG00000024048.10 | ENSP00000361992.1 | 18.4  | 5265 |
| RYTALQAFKF  | 10 | 0.0827  | UBR2     | ENSG00000024048.10 | ENSP00000361992.1 | 18.4  | 5265 |
| EYVEGVYTNH  | 10 | 21.7273 | PTK2B    | ENSG00000120899.18 | ENSP00000391995.2 | 32.3  | 2901 |
| TYIKSPPPF   | 9  | 0.0020  | ACO1     | ENSG00000122729.19 | ENSP00000309477.5 | 18.4  | 2667 |
| SYSMIVNNL   | 9  | 0.0581  | CACYBP   | ENSG00000116161.17 | ENSP00000356652.2 | 21.3  | 684  |
| SQLQALHI    | 8  | 12.2778 | ROCK2    | ENSG00000134318.14 | ENSP00000317985.6 | 16.3  | 4164 |
| SFKQRSDLF   | 9  | 0.2681  | ZNF394   | ENSG00000160908.15 | ENSP00000337363.6 | 21.6  | 1683 |
| RYSDGLLRF   | 9  | 0.0053  | LZTS1    | ENSG00000061337.15 | ENSP00000265801.6 | 26.8  | 1788 |
| ETVEKFRQR   | 9  | 16.7636 | COMMD10  | ENSG00000145781.9  | ENSP00000488332.1 | 21.9  | 564  |
| RFLNDPGHLLW | 11 | 0.1454  | RPP21    | ENSG00000241370.5  | ENSP00000397778.2 | 35.1  | 432  |
| RYVIIPTTF   | 9  | 0.0029  | CAPN5    | ENSG00000149260.18 | ENSP00000498132.1 | 19.1  | 1920 |
| QYQQIISRL   | 9  | 0.0279  | PPP1R13L | ENSG00000104881.16 | ENSP00000354218.4 | 61.2  | 2484 |
| RYNPITKRI   | 9  | 0.0169  | AOX1     | ENSG00000138356.14 | ENSP00000363832.2 | 16.2  | 4014 |
| VYPPIRHHL   | 9  | 0.0075  | VPS37A   | ENSG00000155975.10 | ENSP00000318629.4 | 18.9  | 1191 |
| QYSDVNNRW   | 9  | 0.0627  | SPTBN1   | ENSG00000115306.16 | ENSP00000349259.4 | 262.0 | 7092 |
| SYTSVKENF   | 9  | 0.0066  | FAM120B  | ENSG00000112584.13 | ENSP00000417970.1 | 18.1  | 2730 |
| AYFKDFHLL   | 9  | 0.0062  | SLC13A1  | ENSG00000081800.9  | ENSP00000194130.2 | 15.9  | 1785 |
| SVVGFLSQR   | 9  | 13.2613 | DCAF5    | ENSG00000139990.17 | ENSP00000451845.1 | 41.8  | 2823 |
| VYQHLFTRI   | 9  | 0.0176  | AP5Z1    | ENSG00000242802.9  | ENSP00000497395.1 | 34.0  | 1464 |
| KYVVVTEL    | 9  | 0.0604  | RPS6KA3  | ENSG00000177189.14 | ENSP00000368884.3 | 16.4  | 2220 |
| AYTPFHAVL   | 9  | 0.0646  | INTS14   | ENSG00000138614.15 | ENSP00000326379.2 | 22.8  | 1554 |
| SYLENVDHF   | 9  | 0.0037  | CAMTA2   | ENSG00000108509.21 | ENSP00000354828.5 | 45.3  | 3603 |
| EAIGIISKM   | 9  | 7.1005  | NCAPD2   | ENSG00000010292.13 | ENSP00000325017.5 | 25.6  | 4203 |
| DLGGLEALRQR | 11 | 45.0000 | FLYWCH1  | ENSG00000059122.16 | ENSP00000344122.5 | 59.4  | 1482 |
| ALPSKLPTF   | 9  | 0.0710  | TRIM25   | ENSG00000121060.18 | ENSP00000323889.4 | 29.4  | 1890 |
| KYHTHLLQF   | 9  | 0.0065  | ABCD1    | ENSG00000101986.12 | ENSP00000218104.3 | 15.3  | 2235 |
| TYDRVESLF   | 9  | 0.0432  | EXT2     | ENSG00000151348.14 | ENSP00000342656.3 | 22.8  | 2154 |

|             |    |         |            |                    |                   |       |      |
|-------------|----|---------|------------|--------------------|-------------------|-------|------|
| FYHKYFNLY   | 9  | 0.0550  | EXT2       | ENSG00000151348.14 | ENSP00000342656.3 | 22.8  | 2154 |
| RYGLVTNEI   | 9  | 0.1078  | IFIH1      | ENSG00000115267.8  | ENSP00000497271.1 | 22.1  | 3075 |
| ILGPPPPSF   | 9  | 0.1364  | MATR3      | ENSG00000015479.18 | ENSP00000426030.1 | 68.8  | 1527 |
| VYLPLTSHI   | 9  | 0.0047  | SNX8       | ENSG00000106266.11 | ENSP00000222990.3 | 16.8  | 1395 |
| AVIGYLSTR   | 9  | 9.8029  | NOP9       | ENSG00000196943.14 | ENSP00000267425.3 | 15.3  | 1908 |
| KYLVLANML   | 9  | 0.1245  | COPS2      | ENSG00000166200.15 | ENSP00000373553.5 | 20.9  | 1329 |
| TYVRWYTQL   | 9  | 0.0521  | CLCC1      | ENSG00000121940.15 | ENSP00000358987.3 | 21.2  | 1503 |
| KYHIVKQIF   | 9  | 0.0238  | AC098582.1 | ENSG00000287542.1  | ENSP00000421021.2 | 14.3  | 3126 |
| NYITAALKL   | 9  | 0.1203  | AC098582.1 | ENSG00000287542.1  | ENSP00000421021.2 | 14.3  | 3126 |
| AYVEKVEKL   | 9  | 0.0288  | AMOTL1     | ENSG00000166025.18 | ENSP00000387739.2 | 22.4  | 2868 |
| KYLEESTIRHF | 11 | 0.0224  | AMOTL1     | ENSG00000166025.18 | ENSP00000387739.2 | 22.4  | 2868 |
| RYTPVGRSFF  | 10 | 0.0225  | AGO4       | ENSG00000134698.11 | ENSP00000362306.3 | 17.2  | 2583 |
| SYIDLLQRF   | 9  | 0.0013  | WDR24      | ENSG00000127580.17 | ENSP00000293883.4 | 15.6  | 2370 |
| HYVEKPSTF   | 9  | 0.0078  | GMPPA      | ENSG00000144591.18 | ENSP00000363027.3 | 52.0  | 1419 |
| EVMQAVARL   | 9  | 7.4740  | TCAF1      | ENSG00000198420.10 | ENSP00000419235.1 | 17.2  | 2763 |
| EIYTGTSVAR  | 10 | 14.3556 | LMTK2      | ENSG00000164715.6  | ENSP00000297293.5 | 14.2  | 4509 |
| QYSPLLAFF   | 9  | 0.0084  | BZW1       | ENSG00000082153.18 | ENSP00000394316.2 | 36.6  | 1353 |
| YYEYNHDLF   | 9  | 0.0995  | SAV1       | ENSG00000151748.14 | ENSP00000324729.4 | 17.7  | 1149 |
| VYSDYLQTI   | 9  | 0.0057  | PCED1B     | ENSG00000179715.13 | ENSP00000446688.1 | 16.3  | 1296 |
| AYAENIALL   | 9  | 0.0387  | PIK3R4     | ENSG00000196455.8  | ENSP00000349205.3 | 15.4  | 4074 |
| MLLVGKDGNV  | 10 | 56.6667 | CCDC80     | ENSG00000091986.15 | ENSP00000206423.3 | 18.5  | 2850 |
| YWMHVQNTF   | 9  | 0.0130  | KLHL24     | ENSG00000114796.16 | ENSP00000395012.1 | 19.3  | 1800 |
| KYLTEGLLQF  | 10 | 0.0110  | NFE2L1     | ENSG00000082641.16 | ENSP00000355190.3 | 108.9 | 2283 |
| AVIDQGLITR  | 10 | 21.2273 | C11orf98   | ENSG00000278615.4  | ENSP00000432523.1 | 17.3  | 369  |
| NYSNIRFQF   | 9  | 0.0096  | MTMR6      | ENSG00000139505.11 | ENSP00000371221.5 | 14.1  | 1863 |
| RYSEYAEEF   | 9  | 0.0054  | MTMR6      | ENSG00000139505.11 | ENSP00000371221.5 | 14.1  | 1863 |
| PYQSQIAVF   | 9  | 0.0263  | RAD17      | ENSG00000152942.19 | ENSP00000350725.2 | 20.0  | 1515 |

|             |    |         |            |                    |                   |       |       |
|-------------|----|---------|------------|--------------------|-------------------|-------|-------|
| EYMEHVYLI   | 9  | 0.0119  | OSBPL2     | ENSG00000130703.16 | ENSP00000494549.1 | 39.2  | 1440  |
| MVVGRGLLGR  | 10 | 41.5000 | HAGH       | ENSG00000063854.13 | ENSP00000380514.3 | 62.6  | 924   |
| RYTDRDFYF   | 9  | 0.0094  | AL022312.1 | ENSG00000285025.1  | ENSP00000490747.1 | 13.9  | 210   |
| AYTLLLHTW   | 9  | 0.0151  | DOCK2      | ENSG00000134516.17 | ENSP00000429283.2 | 44.2  | 5490  |
| RYQTQPVTL   | 9  | 0.0166  | SVIL       | ENSG00000197321.14 | ENSP00000348128.4 | 49.6  | 6642  |
| QYNPKFQTL   | 9  | 0.0043  | YY1AP1     | ENSG00000163374.19 | ENSP00000357314.2 | 53.7  | 2250  |
| FYIRRVHNL   | 9  | 0.0262  | NUP205     | ENSG00000155561.15 | ENSP00000285968.6 | 17.6  | 6036  |
| SYLIIHQRI   | 9  | 0.0210  | ZNF397     | ENSG00000186812.13 | ENSP00000331577.6 | 19.1  | 1602  |
| SYLTSASSL   | 9  | 0.1760  | UBR5       | ENSG00000104517.13 | ENSP00000429084.1 | 38.4  | 8397  |
| VYSQIPAAVKL | 11 | 0.1193  | UBR5       | ENSG00000104517.13 | ENSP00000429084.1 | 38.4  | 8397  |
| AYGGAFYAF   | 9  | 0.0102  | L3HYPDH    | ENSG00000126790.12 | ENSP00000247194.4 | 46.1  | 1062  |
| TYQSITERI   | 9  | 0.0213  | EXOC4      | ENSG00000131558.15 | ENSP00000253861.4 | 22.8  | 2922  |
| KYVSGEFRF   | 9  | 0.0074  | RIOK1      | ENSG00000124784.9  | ENSP00000369162.2 | 15.6  | 1704  |
| AYLSKAMEI   | 9  | 0.0860  | RIOK1      | ENSG00000124784.9  | ENSP00000369162.2 | 15.6  | 1704  |
| ELKQLAAAR   | 9  | 38.3333 | SPTAN1     | ENSG00000197694.15 | ENSP00000487444.1 | 112.3 | 7494  |
| EVIEKFDYV   | 9  | 9.2330  | PMM1       | ENSG00000100417.12 | ENSP00000216259.7 | 91.1  | 786   |
| ETVGTGIMGR  | 10 | 47.0000 | INPP5B     | ENSG00000204084.13 | ENSP00000362118.1 | 19.4  | 2247  |
| VYYPVRHHL   | 9  | 0.0050  | TRRAP      | ENSG00000196367.13 | ENSP00000403708.3 | 19.9  | 11544 |
| RYFENPQVI   | 9  | 0.0138  | TRRAP      | ENSG00000196367.13 | ENSP00000403708.3 | 19.9  | 11544 |
| RYLWISEKL   | 9  | 0.0254  | LRRC42     | ENSG00000116212.15 | ENSP00000360421.3 | 21.6  | 1284  |
| KYFEKQFEL   | 9  | 0.0092  | TATDN1     | ENSG00000147687.19 | ENSP00000430274.1 | 29.2  | 966   |
| SYQKLLFKF   | 9  | 0.0027  | RB1CC1     | ENSG00000023287.13 | ENSP00000396067.2 | 14.8  | 4773  |
| EQYYAMKI    | 8  | 19.0968 | PRKACB     | ENSG00000142875.19 | ENSP00000479339.1 | 25.8  | 1014  |
| AYINRASLL   | 9  | 0.1419  | COPS4      | ENSG00000138663.9  | ENSP00000424655.1 | 28.2  | 1260  |
| NYQNVVHKL   | 9  | 0.0081  | ZMYM4      | ENSG00000146463.11 | ENSP00000322915.6 | 16.8  | 4644  |
| FYQPISHQW   | 9  | 0.0018  | ADAMTSL3   | ENSG00000156218.13 | ENSP00000286744.5 | 15.9  | 5073  |
| KYFEVPSVL   | 9  | 0.0163  | ACTR10     | ENSG00000131966.14 | ENSP00000254286.4 | 37.4  | 1251  |

|             |    |         |          |                    |                   |      |      |
|-------------|----|---------|----------|--------------------|-------------------|------|------|
| ETAFGYKGL   | 9  | 15.4783 | HAT1     | ENSG00000128708.13 | ENSP00000264108.4 | 31.0 | 1257 |
| EYLADLYHF   | 9  | 0.0065  | SH3BP1   | ENSG00000100092.23 | ENSP00000497104.1 | 24.1 | 2103 |
| IFTNTVARE   | 9  | 0.0604  | AKAP11   | ENSG00000023516.9  | ENSP00000025301.2 | 13.0 | 5703 |
| DYAELLQHF   | 9  | 0.0174  | VAC14    | ENSG00000103043.15 | ENSP00000439284.2 | 34.6 | 642  |
| RYIRDAHTF   | 9  | 0.0026  | ARHGAP35 | ENSG00000160007.18 | ENSP00000385720.2 | 16.7 | 4497 |
| IYHPNVDKL   | 9  | 0.0167  | UBE2N    | ENSG00000177889.10 | ENSP00000316176.2 | 17.6 | 456  |
| RYLDEINLL   | 9  | 0.0090  | GNA15    | ENSG00000060558.3  | ENSP00000262958.2 | 12.9 | 1122 |
| RYNPRTNQW   | 9  | 0.0172  | KLHL20   | ENSG00000076321.11 | ENSP00000209884.4 | 15.8 | 1827 |
| PYVNNVPHL   | 9  | 0.0854  | MARS     | ENSG00000166986.15 | ENSP00000446168.2 | 71.0 | 1638 |
| DYAYLREHF   | 9  | 0.1404  | ZNF598   | ENSG00000167962.14 | ENSP00000455308.2 | 22.3 | 2712 |
| IYQFIMDRF   | 9  | 0.0122  | FOXC2    | ENSG00000176692.8  | ENSP00000497759.1 | 12.7 | 1503 |
| KYISKPENL   | 9  | 0.0178  | CAB39    | ENSG00000135932.11 | ENSP00000258418.5 | 15.7 | 1023 |
| KYAQWEESL   | 9  | 0.1067  | CRNKL1   | ENSG00000101343.14 | ENSP00000440733.1 | 15.6 | 2061 |
| RFEKHXAYF   | 9  | 0.1403  | CRNKL1   | ENSG00000101343.14 | ENSP00000440733.1 | 15.6 | 2061 |
| LYLGRAEEF   | 9  | 0.0144  | CHPF2    | ENSG00000033100.16 | ENSP00000035307.2 | 17.4 | 2316 |
| TYLNYVVHL   | 9  | 0.0154  | ZNF292   | ENSG00000188994.13 | ENSP00000342847.4 | 15.7 | 8154 |
| VYSFVTPTF   | 9  | 0.0016  | PLXNA3   | ENSG00000130827.6  | ENSP00000358696.3 | 23.5 | 5613 |
| VYVDLGGSHVF | 11 | 0.0196  | BMS1     | ENSG00000165733.8  | ENSP00000363642.4 | 12.5 | 3846 |
| YATHPFKF    | 8  | 0.3811  | NCOA7    | ENSG00000111912.20 | ENSP00000357341.3 | 33.6 | 2826 |
| AYATHPFKF   | 9  | 0.0033  | NCOA7    | ENSG00000111912.20 | ENSP00000357341.3 | 33.6 | 2826 |
| YYNINQVTL   | 9  | 0.0300  | NFIX     | ENSG00000008441.16 | ENSP00000353219.4 | 25.3 | 1209 |
| VYPLMKEYF   | 9  | 0.0120  | TFIP11   | ENSG00000100109.17 | ENSP00000384421.1 | 25.7 | 2511 |
| KYGIVQEF    | 8  | 0.0790  | SOGA1    | ENSG00000149639.15 | ENSP00000237536.4 | 13.1 | 4983 |
| KYGIVQEFF   | 9  | 0.0093  | SOGA1    | ENSG00000149639.15 | ENSP00000237536.4 | 13.1 | 4983 |
| RYKQDVERF   | 9  | 0.0141  | SMC5     | ENSG00000198887.9  | ENSP00000354957.5 | 16.7 | 3303 |
| PYSEKMTVLF  | 10 | 0.0749  | SMC5     | ENSG00000198887.9  | ENSP00000354957.5 | 16.7 | 3303 |
| IYEETRGLV   | 9  | 1.1586  | HIST2H4B | ENSG00000270276.2  | ENSP00000482412.1 | 12.5 | 309  |

|              |    |         |                 |                    |                   |      |       |
|--------------|----|---------|-----------------|--------------------|-------------------|------|-------|
| IYEETRGVLKVF | 12 | 0.8699  | HIST2H4B        | ENSG00000270276.2  | ENSP00000482412.1 | 12.5 | 309   |
| YEETRGVLKVFL | 12 | 30.8333 | HIST2H4B        | ENSG00000270276.2  | ENSP00000482412.1 | 12.5 | 309   |
| DNIQGITKPAIR | 12 | 70.0000 | HIST2H4B        | ENSG00000270276.2  | ENSP00000482412.1 | 12.5 | 309   |
| KYVKIFDNF    | 9  | 0.0045  | ZNF195          | ENSG00000005801.18 | ENSP00000435828.1 | 19.3 | 1830  |
| VYPSSLSKI    | 9  | 0.0257  | CAND1           | ENSG00000111530.13 | ENSP00000442318.1 | 20.1 | 3690  |
| HYIERIQKL    | 9  | 0.0099  | KANK1           | ENSG00000107104.18 | ENSP00000371730.3 | 42.9 | 3582  |
| VYNTATNQWF   | 10 | 0.0599  | HCFC1           | ENSG00000172534.14 | ENSP00000359001.4 | 20.5 | 6240  |
| KYGQGFYLI    | 9  | 0.0105  | LLGL2           | ENSG00000073350.13 | ENSP00000464397.1 | 64.2 | 3057  |
| KYLINLETL    | 9  | 0.0319  | JAK2            | ENSG00000096968.13 | ENSP00000371067.3 | 13.7 | 3396  |
| YQRAFQHL     | 8  | 1.3761  | PRKDC           | ENSG00000253729.7  | ENSP00000345182.4 | 20.5 | 12291 |
| QSTRLPLI     | 8  | 18.3947 | PRKDC           | ENSG00000253729.7  | ENSP00000345182.4 | 20.5 | 12291 |
| LYQRAFQHL    | 9  | 0.0160  | PRKDC           | ENSG00000253729.7  | ENSP00000345182.4 | 20.5 | 12291 |
| VYTPVLEHL    | 9  | 0.0038  | PRKDC           | ENSG00000253729.7  | ENSP00000345182.4 | 20.5 | 12291 |
| PYRLIFEKF    | 9  | 0.1154  | PRKDC           | ENSG00000253729.7  | ENSP00000345182.4 | 20.5 | 12291 |
| ESILLPRI     | 8  | 22.3684 | SPG11           | ENSG00000104133.15 | ENSP00000445278.2 | 38.4 | 6990  |
| SYASLQQNKW   | 10 | 0.1314  | SPG11           | ENSG00000104133.15 | ENSP00000445278.2 | 38.4 | 6990  |
| NYNEKIYEL    | 9  | 0.0292  | UFD1            | ENSG00000070010.19 | ENSP00000263202.9 | 34.1 | 921   |
| DYSSILQKF    | 9  | 0.0077  | FNBP1           | ENSG00000187239.17 | ENSP00000407548.2 | 40.9 | 1836  |
| AYHNSPAYL    | 9  | 0.1615  | SMARCE1         | ENSG00000073584.20 | ENSP00000493649.1 | 59.7 | 345   |
| YYLNRTHML    | 9  | 0.0132  | FARS2           | ENSG00000145982.12 | ENSP00000274680.3 | 17.0 | 1353  |
| FYMDTSHLF    | 9  | 0.0010  | PRRC2C          | ENSG00000117523.16 | ENSP00000495867.1 | 53.2 | 3270  |
| GYIESVQHI    | 9  | 0.0253  | MGME1           | ENSG00000125871.14 | ENSP00000366939.5 | 28.6 | 1032  |
| EVVDLLLAR    | 9  | 25.8333 | ANKHD1-EIF4EBP3 | ENSG00000254996.5  | ENSP00000432016.1 | 44.5 | 7851  |
| EVVSLLLDR    | 9  | 43.0000 | ANKHD1-EIF4EBP3 | ENSG00000254996.5  | ENSP00000432016.1 | 44.5 | 7851  |
| EVFANRFTQM   | 10 | 7.5680  | DENND5A         | ENSG00000184014.8  | ENSP00000328524.3 | 98.5 | 3861  |
| TQPGTGWQF    | 10 | 0.6774  | NECAP2          | ENSG00000157191.20 | ENSP00000427620.1 | 57.0 | 789   |
| HVFDRPYPLA   | 10 | 15.5362 | CUEDC1          | ENSG00000180891.13 | ENSP00000462717.1 | 31.8 | 1158  |

|            |    |         |         |                    |                   |      |       |
|------------|----|---------|---------|--------------------|-------------------|------|-------|
| RYGPVVDVY  | 9  | 0.1877  | SRSF10  | ENSG00000188529.14 | ENSP00000344149.4 | 50.0 | 783   |
| YYLTDIDRI  | 9  | 0.1415  | GNA14   | ENSG00000156049.7  | ENSP00000365807.4 | 12.6 | 1065  |
| HYSTLVHMF  | 9  | 0.0039  | DNAH11  | ENSG00000105877.18 | ENSP00000475939.1 | 23.2 | 13548 |
| KYIGNLDDL  | 9  | 0.0547  | DNAH11  | ENSG00000105877.18 | ENSP00000475939.1 | 23.2 | 13548 |
| AYGDIKERL  | 9  | 0.1340  | TBKBP1  | ENSG00000198933.9  | ENSP00000354777.3 | 15.1 | 1845  |
| AYLEAHETF  | 9  | 0.0026  | NUP107  | ENSG00000111581.10 | ENSP00000441448.1 | 19.3 | 2688  |
| EVVDFRGMRL | 10 | 8.8067  | NCKAP1  | ENSG00000061676.15 | ENSP00000355348.3 | 18.7 | 3384  |
| IYGYVAEQF  | 9  | 0.0035  | SPCS1   | ENSG00000114902.14 | ENSP00000478310.2 | 42.9 | 306   |
| RYPAIINYNI | 9  | 0.0087  | SLC35B1 | ENSG00000121073.14 | ENSP00000423323.1 | 45.9 | 681   |
| TYLTSIPSI  | 9  | 0.0302  | MCF2L   | ENSG00000126217.21 | ENSP00000397285.1 | 91.3 | 3201  |
| VYAKLLHRY  | 9  | 0.1186  | FBXO31  | ENSG00000103264.18 | ENSP00000310841.4 | 15.9 | 1617  |
| FEYQVRSI   | 8  | 16.0545 | DDX42   | ENSG00000198231.13 | ENSP00000352308.5 | 67.7 | 2457  |
| SYVHYVFL   | 9  | 0.0545  | DOCK8   | ENSG00000107099.15 | ENSP00000371766.1 | 41.4 | 4698  |
| NYIGLINRI  | 9  | 0.0555  | EIF2AK2 | ENSG00000055332.18 | ENSP00000233057.4 | 13.3 | 1653  |
| SYLEKQVWTF | 10 | 0.0074  | TTC27   | ENSG00000018699.13 | ENSP00000313953.4 | 12.0 | 2529  |
| NYKDLNGNVF | 10 | 0.2590  | SSR1    | ENSG00000124783.14 | ENSP00000244763.4 | 15.1 | 858   |
| RYLRVEHHF  | 9  | 0.0028  | ACACB   | ENSG00000076555.15 | ENSP00000367079.3 | 23.5 | 7374  |
| AYLEAYKEF  | 9  | 0.0072  | ETNK1   | ENSG00000139163.15 | ENSP00000266517.3 | 15.6 | 1356  |
| RYLEKSGVL  | 9  | 0.2609  | MYCBP   | ENSG00000214114.9  | ENSP00000380702.2 | 13.2 | 309   |
| EVWPHSTER  | 9  | 13.3694 | LYSMD1  | ENSG00000163155.12 | ENSP00000357904.5 | 11.8 | 681   |
| KYPDIISRI  | 9  | 0.0067  | LIG1    | ENSG00000105486.14 | ENSP00000471836.1 | 27.7 | 2403  |
| RYSPLSRF   | 9  | 0.0012  | COG1    | ENSG00000166685.12 | ENSP00000400111.3 | 33.8 | 2886  |
| QYNPHVHQL  | 9  | 0.0061  | DLG5    | ENSG00000151208.17 | ENSP00000394797.1 | 18.6 | 2640  |
| SQRFTVQI   | 8  | 14.4444 | TAF9B   | ENSG00000187325.5  | ENSP00000339917.5 | 11.6 | 753   |
| VYMNVRKEI  | 9  | 0.0801  | C1D     | ENSG00000197223.11 | ENSP00000386468.3 | 22.3 | 423   |
| KYAELRDTI  | 9  | 0.0930  | MYO6    | ENSG00000196586.15 | ENSP00000358992.1 | 18.4 | 3759  |
| PLPKETWKF  | 9  | 0.2212  | AOAH    | ENSG00000136250.11 | ENSP00000479664.1 | 47.4 | 2064  |

|            |    |         |         |                    |                   |       |       |
|------------|----|---------|---------|--------------------|-------------------|-------|-------|
| VYMNVMTRL  | 9  | 0.0185  | PPP2R3A | ENSG00000073711.11 | ENSP00000264977.3 | 12.6  | 3450  |
| LFIATSQKF  | 9  | 0.0541  | NCAPH2  | ENSG00000025770.19 | ENSP00000410088.2 | 46.8  | 1815  |
| SYTRLFSNF  | 9  | 0.0087  | UBP1    | ENSG00000153560.12 | ENSP00000283629.3 | 27.6  | 1620  |
| EVISKTPTL  | 9  | 2.3082  | CREBRF  | ENSG00000164463.12 | ENSP00000296953.2 | 12.9  | 1917  |
| QYVVDLTSF  | 9  | 0.0385  | NTPCR   | ENSG00000135778.12 | ENSP00000355587.4 | 26.8  | 570   |
| VMYRVIQV   | 8  | 13.3514 | USF1    | ENSG00000158773.14 | ENSP00000435005.1 | 123.5 | 651   |
| EVLQGGSOR  | 9  | 32.2000 | USF1    | ENSG00000158773.14 | ENSP00000435005.1 | 123.5 | 651   |
| RYLELISSI  | 9  | 0.0205  | IFT122  | ENSG00000163913.11 | ENSP00000425536.1 | 36.0  | 3702  |
| SYNPITHQL  | 9  | 0.0025  | IFT122  | ENSG00000163913.11 | ENSP00000425536.1 | 36.0  | 3702  |
| TMLGKFYHF  | 9  | 0.0873  | IFT122  | ENSG00000163913.11 | ENSP00000425536.1 | 36.0  | 3702  |
| PWPKVLKI   | 8  | 1.6966  | EPB41   | ENSG00000159023.21 | ENSP00000497875.1 | 27.4  | 1626  |
| KYQPRIAVF  | 9  | 0.0027  | TDG     | ENSG00000139372.15 | ENSP00000376611.3 | 17.9  | 1230  |
| YYAKEIHKF  | 9  | 0.0007  | TGFB3   | ENSG00000119699.7  | ENSP00000238682.3 | 22.8  | 1236  |
| IYVPSSYHL  | 9  | 0.0039  | SLF2    | ENSG00000119906.13 | ENSP00000238961.3 | 19.2  | 3519  |
| KYQIINEEF  | 9  | 0.0066  | HPS3    | ENSG00000163755.8  | ENSP00000296051.2 | 42.1  | 3012  |
| QYLPSPELL  | 9  | 0.0066  | KCNJ5   | ENSG00000120457.12 | ENSP00000433295.1 | 11.5  | 1257  |
| NYIMKIHNF  | 9  | 0.0043  | ADNP    | ENSG00000101126.17 | ENSP00000495540.1 | 15.0  | 2622  |
| VYPEEHSRW  | 9  | 0.0249  | RSRP1   | ENSG00000117616.18 | ENSP00000391510.3 | 71.3  | 726   |
| SYGDILHVI  | 9  | 0.0092  | DLG3    | ENSG00000082458.12 | ENSP00000441393.1 | 13.0  | 1098  |
| IYNKIKQII  | 9  | 0.0481  | DLG3    | ENSG00000082458.12 | ENSP00000441393.1 | 13.0  | 1098  |
| KYIDQKFVL  | 9  | 0.0265  | PPP2R5D | ENSG00000112640.15 | ENSP00000417963.1 | 17.0  | 1806  |
| NYAQVLDKF  | 9  | 0.0094  | ASAP1   | ENSG00000153317.15 | ENSP00000350297.2 | 30.0  | 3366  |
| TYDSVTDKF  | 9  | 0.0408  | USP34   | ENSG00000115464.14 | ENSP00000381577.2 | 21.7  | 10638 |
| KYIKDDFRF  | 9  | 0.0068  | RIOK3   | ENSG00000101782.15 | ENSP00000462548.1 | 34.9  | 1548  |
| LYQDQILEKF | 10 | 0.0214  | TUBE1   | ENSG00000074935.14 | ENSP00000474458.1 | 21.8  | 660   |
| YYLNLDLRI  | 9  | 0.1787  | GNAI1   | ENSG00000127955.17 | ENSP00000343027.3 | 18.2  | 1062  |
| RYDSVINRL  | 9  | 0.0451  | PCF11   | ENSG00000165494.11 | ENSP00000298281.4 | 54.1  | 4665  |

|             |    |         |            |                    |                   |       |      |
|-------------|----|---------|------------|--------------------|-------------------|-------|------|
| DVIERVIQY   | 9  | 5.7231  | NIPBL      | ENSG00000164190.19 | ENSP00000282516.8 | 17.2  | 8412 |
| EVPSFTMGR   | 9  | 13.1892 | PRKRIP1    | ENSG00000128563.13 | ENSP00000419270.1 | 51.5  | 552  |
| RFKNKAYLL   | 9  | 0.2653  | DICER1     | ENSG00000100697.14 | ENSP00000376783.1 | 14.3  | 5766 |
| GVISMPVAAR  | 10 | 41.5000 | FP565260.6 | ENSG00000280433.1  | ENSP00000485615.1 | 11.1  | 609  |
| EVAEKIWSNR  | 10 | 27.1000 | ARAP3      | ENSG00000120318.16 | ENSP00000421468.1 | 48.9  | 3579 |
| RYASIN AHL  | 9  | 0.0369  | CSNK1A1    | ENSG00000113712.18 | ENSP00000499757.1 | 33.5  | 975  |
| HYMPPPYASL  | 10 | 0.0343  | RNF111     | ENSG00000157450.15 | ENSP00000453015.1 | 15.3  | 3009 |
| IYTNLNQKI   | 9  | 0.0304  | EXOC6B     | ENSG00000144036.15 | ENSP00000272427.6 | 12.2  | 2433 |
| SVYDGEEHGR  | 10 | 12.8750 | EXOC6B     | ENSG00000144036.15 | ENSP00000272427.6 | 12.2  | 2433 |
| TYLPQVSHYRF | 11 | 0.0111  | EXOC6B     | ENSG00000144036.15 | ENSP00000272427.6 | 12.2  | 2433 |
| VYPVITARL   | 9  | 0.0206  | ZNF106     | ENSG00000103994.17 | ENSP00000263805.4 | 14.4  | 5649 |
| HYN SHYEKF  | 9  | 0.0073  | ASTN2      | ENSG00000148219.16 | ENSP00000363098.3 | 12.2  | 3186 |
| VYVERAEVL   | 9  | 0.0898  | BRAP       | ENSG00000089234.16 | ENSP00000403524.3 | 10.9  | 1776 |
| VYLHDFQRF   | 9  | 0.0021  | PLCG2      | ENSG00000197943.10 | ENSP00000482457.1 | 19.3  | 3795 |
| DLISEDVQRR  | 10 | 45.0000 | ARHGEF1    | ENSG00000076928.17 | ENSP00000367394.3 | 201.0 | 2844 |
| TYAQR TQLF  | 9  | 0.0047  | MKLN1      | ENSG00000128585.18 | ENSP00000398094.2 | 22.7  | 1929 |
| KYITDWQNVF  | 10 | 0.0204  | PDCD6      | ENSG00000249915.8  | ENSP00000423815.1 | 112.2 | 567  |
| AYVEKVERL   | 9  | 0.0429  | AMOTL2     | ENSG00000114019.14 | ENSP00000424765.1 | 38.8  | 2511 |
| KYLEERAMRQF | 11 | 0.0864  | AMOTL2     | ENSG00000114019.14 | ENSP00000424765.1 | 38.8  | 2511 |
| IYTKIMDLI   | 9  | 0.0965  | DPY19L1    | ENSG00000173852.14 | ENSP00000490722.1 | 12.0  | 2244 |
| SYSQSSNLF   | 9  | 0.0098  | ZNF24      | ENSG00000172466.16 | ENSP00000261332.5 | 23.0  | 1104 |
| ETAEQGLLNR  | 10 | 40.0000 | ZFX        | ENSG00000005889.15 | ENSP00000368475.1 | 16.6  | 2415 |
| AYNPMARDLF  | 10 | 0.0647  | MTOR       | ENSG00000198793.12 | ENSP00000354558.4 | 27.1  | 7647 |
| IYADNQVMHF  | 10 | 0.0050  | POLE       | ENSG00000177084.16 | ENSP00000322570.5 | 18.5  | 6858 |
| VYTYIQSRF   | 9  | 0.0084  | DYRK2      | ENSG00000127334.10 | ENSP00000342105.3 | 13.7  | 1803 |
| SYPDNFLHI   | 9  | 0.0090  | ATG5       | ENSG00000057663.16 | ENSP00000358072.3 | 17.9  | 825  |
| KYMSVIAEL   | 9  | 0.0139  | ATPAF1     | ENSG00000123472.12 | ENSP00000460964.1 | 17.7  | 1053 |

|            |    |         |          |                    |                   |       |      |
|------------|----|---------|----------|--------------------|-------------------|-------|------|
| VYAVIPAEKF | 10 | 0.0179  | ATPAF1   | ENSG00000123472.12 | ENSP00000460964.1 | 17.7  | 1053 |
| QYEKLFHKW  | 9  | 0.0203  | ORC2     | ENSG00000115942.9  | ENSP00000234296.2 | 18.9  | 1731 |
| MYINEVERL  | 9  | 0.0286  | PTPN14   | ENSG00000152104.12 | ENSP00000355923.4 | 11.4  | 3561 |
| RYLHSHHFL  | 9  | 0.0123  | VIRMA    | ENSG00000164944.12 | ENSP00000297591.5 | 20.6  | 5436 |
| EVVELPVTER | 10 | 37.0000 | TBC1D10A | ENSG00000099992.15 | ENSP00000215790.7 | 23.1  | 1524 |
| LYSEVDVHF  | 9  | 0.0052  | POGZ     | ENSG00000143442.22 | ENSP00000431259.1 | 36.9  | 4044 |
| IYQRHVYNL  | 9  | 0.0095  | TMEM209  | ENSG00000146842.17 | ENSP00000380747.2 | 10.7  | 1683 |
| PYNHQHEYF  | 9  | 0.0658  | FADS2    | ENSG00000134824.14 | ENSP00000431091.1 | 25.0  | 1158 |
| EYRKVFENF  | 9  | 0.0584  | IGF1R    | ENSG00000140443.15 | ENSP00000496919.1 | 30.8  | 4098 |
| VYNSEYYHF  | 9  | 0.0011  | PTK7     | ENSG00000112655.16 | ENSP00000418754.1 | 14.7  | 3234 |
| TYLEKAVEV  | 9  | 0.2187  | ATM      | ENSG00000149311.18 | ENSP00000278616.4 | 39.2  | 9168 |
| KYSSGFRNI  | 9  | 0.0808  | ATM      | ENSG00000149311.18 | ENSP00000278616.4 | 39.2  | 9168 |
| VYTSVVEEL  | 9  | 0.0209  | MAN2B2   | ENSG00000013288.8  | ENSP00000285599.3 | 20.7  | 3027 |
| YIKQIKTF   | 8  | 0.4863  | RBL2     | ENSG00000103479.16 | ENSP00000262133.6 | 111.5 | 3417 |
| IYIKQIKTF  | 9  | 0.0027  | RBL2     | ENSG00000103479.16 | ENSP00000262133.6 | 111.5 | 3417 |
| EVADRLFSSF | 10 | 4.4254  | TAPT1    | ENSG00000169762.17 | ENSP00000385347.2 | 18.1  | 1701 |
| VQPSLFYHL  | 9  | 0.2026  | MAP3K6   | ENSG00000142733.17 | ENSP00000363152.2 | 54.3  | 3840 |
| EVIDVVRTM  | 9  | 3.9045  | TAF1     | ENSG00000147133.15 | ENSP00000276072.3 | 19.8  | 5679 |
| DYMKTTSNF  | 9  | 0.0203  | NEMF     | ENSG00000165525.18 | ENSP00000298310.5 | 18.3  | 3228 |
| TYDYNFHSF  | 9  | 0.0054  | ASH1L    | ENSG00000116539.13 | ENSP00000376204.3 | 12.9  | 8892 |
| FYIHEVQEL  | 9  | 0.0347  | HERC4    | ENSG00000148634.15 | ENSP00000362804.4 | 23.0  | 3147 |
| RYPQSIFSTF | 10 | 0.0036  | SBF2     | ENSG00000133812.15 | ENSP00000256190.8 | 26.7  | 5547 |
| RYALIMHKL  | 9  | 0.0091  | ZBTB11   | ENSG00000066422.4  | ENSP00000326200.4 | 11.2  | 3159 |
| TYLTNHLRL  | 9  | 0.0482  | ZNF697   | ENSG00000143067.5  | ENSP00000396857.2 | 9.5   | 1635 |
| VYTTTRSHL  | 9  | 0.2157  | CLPTM1L  | ENSG00000049656.14 | ENSP00000313854.5 | 143.5 | 1614 |
| PYMAKFVVF  | 9  | 0.0179  | ANK3     | ENSG00000151150.22 | ENSP00000362933.2 | 21.7  | 5583 |
| TVISRVIGR  | 9  | 15.8406 | ANKRD17  | ENSG00000132466.18 | ENSP00000427151.2 | 26.8  | 7470 |

|              |    |         |            |                    |                   |       |       |
|--------------|----|---------|------------|--------------------|-------------------|-------|-------|
| SYLTIHHRI    | 9  | 0.0074  | ZNF12      | ENSG00000164631.19 | ENSP00000385939.1 | 15.2  | 2091  |
| RYMDLAENARF  | 11 | 0.0206  | SPECC1L    | ENSG00000100014.20 | ENSP00000499052.1 | 12.9  | 3408  |
| KYSNMEQSLF   | 10 | 0.0586  | AQR        | ENSG00000021776.11 | ENSP00000156471.5 | 12.7  | 4455  |
| IYPQVLHSL    | 9  | 0.0045  | AC124319.1 | ENSG00000173821.19 | ENSP00000464087.1 | 156.1 | 15621 |
| ETASKTLSR    | 9  | 15.2754 | AC124319.1 | ENSG00000173821.19 | ENSP00000464087.1 | 156.1 | 15621 |
| DLAPFSLRKR   | 10 | 29.2857 | AC124319.1 | ENSG00000173821.19 | ENSP00000464087.1 | 156.1 | 15621 |
| KYSVINEINKI  | 11 | 0.3989  | AC124319.1 | ENSG00000173821.19 | ENSP00000464087.1 | 156.1 | 15621 |
| KYMEDVTQI    | 9  | 0.0173  | PPM1D      | ENSG00000170836.11 | ENSP00000306682.2 | 11.1  | 1815  |
| HYHPIVQRF    | 9  | 0.0015  | NOC3L      | ENSG00000173145.11 | ENSP00000360412.3 | 10.9  | 2400  |
| TYTSNLVRL    | 9  | 0.0535  | DNAJC16    | ENSG00000116138.13 | ENSP00000480224.1 | 12.1  | 1410  |
| AQRLMQLI     | 8  | 19.2581 | MED12      | ENSG00000184634.16 | ENSP00000333125.7 | 27.7  | 6081  |
| EYMIQFNRL    | 9  | 0.0961  | HELZ2      | ENSG00000130589.16 | ENSP00000393257.2 | 14.7  | 6240  |
| VYTSGVYHI    | 9  | 0.0076  | TNS2       | ENSG00000111077.17 | ENSP00000449361.1 | 204.6 | 4032  |
| PYFNAPVYL    | 9  | 0.0836  | GAR1       | ENSG00000109534.17 | ENSP00000378127.3 | 26.6  | 651   |
| GQFLVRII     | 8  | 22.9474 | GUCY1B1    | ENSG00000061918.13 | ENSP00000420842.1 | 40.2  | 1758  |
| MYGFVNHAL    | 9  | 0.1536  | GUCY1B1    | ENSG00000061918.13 | ENSP00000420842.1 | 40.2  | 1758  |
| VYPNSFFRY    | 9  | 0.0928  | MORN1      | ENSG00000116151.14 | ENSP00000367792.3 | 16.5  | 1491  |
| TYLEKFQNL    | 9  | 0.0057  | CLUAP1     | ENSG00000103351.13 | ENSP00000460850.1 | 18.7  | 1239  |
| EYNSALPLL    | 9  | 0.1042  | GTF3C3     | ENSG00000119041.11 | ENSP00000263956.3 | 22.4  | 2658  |
| VYTDFAFRI    | 9  | 0.0366  | NOL9       | ENSG00000162408.11 | ENSP00000366934.5 | 11.6  | 2106  |
| RYLEKNVKL    | 9  | 0.0248  | TGS1       | ENSG00000137574.10 | ENSP00000260129.5 | 9.9   | 2559  |
| YYSAVTPHL    | 9  | 0.0111  | PTBP2      | ENSG00000117569.18 | ENSP00000359216.1 | 16.6  | 1611  |
| TYISAIRERF   | 10 | 0.0194  | NXF1       | ENSG00000162231.14 | ENSP00000294172.2 | 101.7 | 1857  |
| RYLEAALRL    | 9  | 0.0225  | P3H4       | ENSG00000141696.13 | ENSP00000347649.2 | 23.2  | 1311  |
| SQYLTRITI    | 9  | 2.3817  | ANAPC1     | ENSG00000153107.13 | ENSP00000339109.3 | 13.7  | 5832  |
| VYSEAAARVLQF | 11 | 0.0210  | GALK2      | ENSG00000156958.15 | ENSP00000453133.1 | 18.9  | 1302  |
| RYKFNRSRW    | 9  | 0.2913  | TBX3       | ENSG00000135111.16 | ENSP00000257567.2 | 11.9  | 2169  |

|            |    |         |          |                    |                   |      |      |
|------------|----|---------|----------|--------------------|-------------------|------|------|
| KYLHPPTHL  | 9  | 0.0187  | MBNL2    | ENSG00000139793.18 | ENSP00000432422.1 | 24.8 | 765  |
| NYTDIKDYL  | 9  | 0.2450  | NUDT12   | ENSG00000112874.10 | ENSP00000230792.2 | 11.2 | 1386 |
| SFYKIRTI   | 8  | 1.6850  | NEK9     | ENSG00000119638.13 | ENSP00000238616.5 | 47.4 | 2937 |
| RYQEVIQEL  | 9  | 0.0036  | ZFYVE26  | ENSG00000072121.16 | ENSP00000251119.5 | 14.2 | 7617 |
| RYHLVQQLF  | 9  | 0.0035  | FANCF    | ENSG00000183161.5  | ENSP00000330875.3 | 8.9  | 1122 |
| AMVRVISV   | 8  | 30.1667 | EDC4     | ENSG00000038358.15 | ENSP00000351811.5 | 43.0 | 4203 |
| KYPSDLPYM  | 9  | 0.0753  | ERG      | ENSG00000157554.19 | ENSP00000288319.7 | 14.1 | 1437 |
| RFEEAHFTF  | 9  | 0.0219  | PIAS3    | ENSG00000131788.16 | ENSP00000376765.2 | 39.5 | 1884 |
| FYTVIPHNF  | 9  | 0.0028  | PARP3    | ENSG00000041880.14 | ENSP00000395951.2 | 27.5 | 1599 |
| NYSPYVNYF  | 9  | 0.0028  | DPY19L4  | ENSG00000156162.16 | ENSP00000389630.2 | 12.1 | 2169 |
| VYPGDPLRF  | 9  | 0.0068  | TSEN34   | ENSG00000170892.12 | ENSP00000379667.1 | 25.4 | 930  |
| TYVSGTLRF  | 9  | 0.0075  | CEPT1    | ENSG00000134255.14 | ENSP00000477632.1 | 20.4 | 840  |
| RYAVIGADL  | 9  | 0.4147  | LCMT1    | ENSG00000205629.12 | ENSP00000382021.3 | 31.7 | 1002 |
| RQYLAINQI  | 9  | 2.0411  | ITPR2    | ENSG00000123104.12 | ENSP00000370744.3 | 9.2  | 8103 |
| TYPQLEGFKF | 10 | 0.0214  | WDFY4    | ENSG00000128815.19 | ENSP00000320563.5 | 12.4 | 9552 |
| KYVKGLISI  | 9  | 0.0479  | WDR35    | ENSG00000118965.14 | ENSP00000281405.4 | 9.5  | 3510 |
| KYKEAAHLL  | 9  | 0.0110  | KLC2     | ENSG00000174996.11 | ENSP00000377631.2 | 22.5 | 1866 |
| VYENVSHFL  | 9  | 0.0503  | SLC25A32 | ENSG00000164933.12 | ENSP00000297578.4 | 10.0 | 945  |
| SMPDVLKI   | 8  | 3.5362  | TASOR    | ENSG00000163946.13 | ENSP00000399410.2 | 19.2 | 3699 |
| RYIFAKNLF  | 9  | 0.0116  | DGUOK    | ENSG00000114956.20 | ENSP00000264093.4 | 42.0 | 831  |
| EVQDLHLAQR | 10 | 36.0000 | MBOAT7   | ENSG00000125505.17 | ENSP00000375634.1 | 33.3 | 1032 |
| KYRQKFNTL  | 9  | 0.0859  | ITSN2    | ENSG00000198399.14 | ENSP00000479408.1 | 31.4 | 5040 |
| NYLTKIYGL  | 9  | 0.1445  | PODN     | ENSG00000174348.13 | ENSP00000308315.5 | 15.8 | 1983 |
| KYFSQASSL  | 9  | 0.0975  | ZNF226   | ENSG00000167380.16 | ENSP00000465121.1 | 21.3 | 2409 |
| EVMLRVKEM  | 9  | 11.2446 | CDYL2    | ENSG00000166446.15 | ENSP00000476295.1 | 8.4  | 1518 |
| EVIRTLPSL  | 9  | 4.4804  | INPP5D   | ENSG00000168918.14 | ENSP00000405338.2 | 60.0 | 3567 |
| RYQFIEEAF  | 9  | 0.0253  | TRIM33   | ENSG00000197323.12 | ENSP00000351250.2 | 14.2 | 3381 |

|             |    |         |         |                    |                   |      |       |
|-------------|----|---------|---------|--------------------|-------------------|------|-------|
| RYPVGRFPSSL | 10 | 0.1852  | FEM1A   | ENSG00000141965.4  | ENSP00000269856.3 | 8.3  | 2007  |
| FWRGGQYENF  | 10 | 0.5601  | ZC3H18  | ENSG00000158545.15 | ENSP00000416951.2 | 29.8 | 2931  |
| IYSTKLYRF   | 9  | 0.0022  | BTBD10  | ENSG00000148925.10 | ENSP00000435257.1 | 20.9 | 1281  |
| KYSDVKNLI   | 9  | 0.0247  | ZFAT    | ENSG00000066827.16 | ENSP00000428483.1 | 12.8 | 3693  |
| SYQKVMALW   | 9  | 0.0167  | MACF1   | ENSG00000127603.26 | ENSP00000362016.2 | 70.9 | 13302 |
| KYPLLLISRI  | 9  | 0.0231  | ARHGEF2 | ENSG00000116584.18 | ENSP00000354837.4 | 92.7 | 2958  |
| IYPSDSFRQSL | 11 | 0.2160  | ARHGEF2 | ENSG00000116584.18 | ENSP00000354837.4 | 92.7 | 2958  |
| YYEKLHTYF   | 9  | 0.0121  | ITGB4   | ENSG00000132470.14 | ENSP00000400217.2 | 14.3 | 5415  |
| EYLERAPEL   | 9  | 0.1951  | XRN1    | ENSG00000114127.10 | ENSP00000264951.4 | 12.7 | 5118  |
| IMPSSSHLF   | 9  | 0.0176  | XRN1    | ENSG00000114127.10 | ENSP00000264951.4 | 12.7 | 5118  |
| TYVTILPEL   | 9  | 0.0485  | XRN1    | ENSG00000114127.10 | ENSP00000264951.4 | 12.7 | 5118  |
| TYPaelnni   | 9  | 0.0939  | AHR     | ENSG00000106546.14 | ENSP00000242057.4 | 8.8  | 2544  |
| RYGIHPAKF   | 9  | 0.0094  | VWA8    | ENSG00000102763.18 | ENSP00000368612.3 | 8.8  | 5715  |
| PYADQVFRi   | 9  | 0.0718  | HELZ    | ENSG00000198265.12 | ENSP00000351524.5 | 16.3 | 5826  |
| YYPNPPLVL   | 9  | 0.0318  | NT5DC1  | ENSG00000178425.14 | ENSP00000326858.3 | 10.6 | 1365  |
| IYNFPIHAF   | 9  | 0.0042  | MAK16   | ENSG00000198042.11 | ENSP00000353246.5 | 8.6  | 900   |
| HYKPTPLYF   | 9  | 0.0037  | SMC4    | ENSG00000113810.16 | ENSP00000349961.3 | 19.9 | 3864  |
| VYLDKFIRL   | 9  | 0.0061  | GNL3L   | ENSG00000130119.16 | ENSP00000354091.2 | 8.4  | 1746  |
| KYLESVKPF   | 9  | 0.0194  | CROT    | ENSG00000005469.11 | ENSP00000331981.3 | 10.6 | 1836  |
| LYSDIGHLL   | 9  | 0.0129  | SESN3   | ENSG00000149212.11 | ENSP00000441927.1 | 8.4  | 1476  |
| ETIGRLLQL   | 9  | 3.7222  | DEPDC7  | ENSG00000121690.11 | ENSP00000308971.3 | 15.3 | 1506  |
| SYIHVFERL   | 9  | 0.0262  | DOCK7   | ENSG00000116641.17 | ENSP00000340742.5 | 16.3 | 6327  |
| DVIGNEILRR  | 10 | 48.0000 | CLIP3   | ENSG00000105270.15 | ENSP00000353732.3 | 8.5  | 1641  |
| SYVWRTYHL   | 9  | 0.0320  | SNRNP25 | ENSG00000161981.10 | ENSP00000372482.3 | 23.4 | 396   |
| KYFLKPEVL   | 9  | 0.0347  | NCEH1   | ENSG00000144959.10 | ENSP00000442464.1 | 23.3 | 1344  |
| VYVDKVEKM   | 9  | 0.0346  | AMOT    | ENSG00000126016.15 | ENSP00000361027.3 | 13.6 | 3252  |
| KYLEENVMRHF | 11 | 0.0369  | AMOT    | ENSG00000126016.15 | ENSP00000361027.3 | 13.6 | 3252  |

|            |    |         |         |                    |                    |       |       |
|------------|----|---------|---------|--------------------|--------------------|-------|-------|
| TQYKFRLLTA | 9  | 14.3000 | FNDC3B  | ENSG00000075420.13 | ENSP000000338523.4 | 23.0  | 3612  |
| QYMERLQLL  | 9  | 0.0112  | MTX1    | ENSG00000173171.14 | ENSP000000357360.3 | 22.8  | 1398  |
| NYVEVTRKW  | 9  | 0.0602  | MTX1    | ENSG00000173171.14 | ENSP000000357360.3 | 22.8  | 1398  |
| EYAKIEETM  | 9  | 0.2458  | CADPS2  | ENSG00000081803.16 | ENSP000000400401.2 | 11.3  | 3765  |
| YYSHLEGARF | 10 | 0.0970  | URB1    | ENSG00000142207.7  | ENSP000000372199.3 | 8.1   | 6813  |
| TYITSVSRL  | 9  | 0.0426  | OSGIN2  | ENSG00000164823.11 | ENSP000000297438.2 | 9.9   | 1515  |
| KYNIFRSTF  | 9  | 0.0240  | ZNF181  | ENSG00000197841.15 | ENSP000000419435.1 | 12.2  | 1710  |
| KYKDAANLL  | 9  | 0.0484  | KLC1    | ENSG00000126214.21 | ENSP000000412693.4 | 100.0 | 1647  |
| RYTLQASTF  | 9  | 0.0214  | CUL1    | ENSG00000055130.17 | ENSP000000499276.1 | 37.6  | 2277  |
| EVAEHVQYM  | 9  | 5.5985  | GMNN    | ENSG00000112312.10 | ENSP000000230056.3 | 11.5  | 627   |
| HGMTLKS    | 8  | 38.6667 | CDC73   | ENSG00000134371.13 | ENSP000000356405.3 | 8.2   | 1593  |
| DIISQQLVER | 10 | 49.0000 | MPV17   | ENSG00000115204.15 | ENSP000000385175.1 | 97.9  | 339   |
| DVHNFPGTSR | 10 | 24.8571 | KPTN    | ENSG00000118162.14 | ENSP000000337850.2 | 11.1  | 1308  |
| KYGALVNNF  | 9  | 0.0052  | NSUN4   | ENSG00000117481.10 | ENSP000000471937.1 | 12.2  | 453   |
| SYGSVFKAI  | 9  | 0.1405  | STK3    | ENSG00000104375.17 | ENSP000000482260.1 | 14.1  | 1140  |
| VYGTTYQF   | 8  | 0.0623  | TXNDC16 | ENSG00000087301.9  | ENSP000000281741.4 | 8.0   | 2475  |
| SYIDVAVKL  | 9  | 0.0170  | TXNDC16 | ENSG00000087301.9  | ENSP000000281741.4 | 8.0   | 2475  |
| RYLIVHQOI  | 9  | 0.0117  | ZNF432  | ENSG000000256087.7 | ENSP000000221315.4 | 9.7   | 1956  |
| YYDPHQATF  | 9  | 0.0021  | PCNX1   | ENSG00000100731.15 | ENSP000000304192.2 | 15.7  | 7023  |
| NYSRNFSSF  | 9  | 0.0183  | PDZD2   | ENSG00000133401.16 | ENSP000000402033.1 | 26.1  | 8517  |
| KYPVLFQRI  | 9  | 0.0107  | AKAP13  | ENSG00000170776.21 | ENSP000000378018.3 | 38.4  | 4302  |
| IYQREWQRF  | 9  | 0.0043  | ACTR8   | ENSG00000113812.14 | ENSP000000336842.3 | 11.3  | 1872  |
| HQFRMLVV   | 8  | 22.4211 | UVSSA   | ENSG00000163945.16 | ENSP000000421741.1 | 39.8  | 2127  |
| NYATRIVTL  | 9  | 0.0542  | BIRC6   | ENSG00000115760.14 | ENSP000000393596.2 | 35.9  | 14571 |
| VEKPISSW   | 9  | 0.0396  | BIRC6   | ENSG00000115760.14 | ENSP000000393596.2 | 35.9  | 14571 |
| DVKDYLRNM  | 9  | 8.3678  | CCPG1   | ENSG000000260916.7 | ENSP000000311656.6 | 14.7  | 2271  |
| TYGPSFPAF  | 9  | 0.0025  | RALGAPB | ENSG00000170471.15 | ENSP000000262879.6 | 12.8  | 4482  |

|             |    |         |          |                    |                   |      |      |
|-------------|----|---------|----------|--------------------|-------------------|------|------|
| RYPDNLKHL   | 9  | 0.0512  | CCDC59   | ENSG00000133773.12 | ENSP00000256151.7 | 30.1 | 723  |
| RYPDNLKHLYL | 11 | 0.1569  | CCDC59   | ENSG00000133773.12 | ENSP00000256151.7 | 30.1 | 723  |
| KYMLKANLI   | 9  | 0.0535  | NAA15    | ENSG00000164134.13 | ENSP00000381920.1 | 16.9 | 2595 |
| QYIDVSHVF   | 9  | 0.0019  | RFX2     | ENSG00000087903.13 | ENSP00000306335.4 | 12.4 | 2169 |
| AYALLLQHL   | 9  | 0.0246  | SLC26A6  | ENSG00000225697.13 | ENSP00000401066.2 | 19.9 | 2169 |
| EVIAYILER   | 9  | 22.2632 | MED23    | ENSG00000112282.18 | ENSP00000346588.4 | 21.5 | 4095 |
| YDTVFKHF    | 8  | 0.8126  | SP140L   | ENSG00000185404.16 | ENSP00000395195.1 | 26.1 | 1314 |
| VYDTVFKHF   | 9  | 0.0053  | SP140L   | ENSG00000185404.16 | ENSP00000395195.1 | 26.1 | 1314 |
| AYVGLDQTL   | 9  | 0.0679  | ASB1     | ENSG00000065802.12 | ENSP00000264607.4 | 7.9  | 1005 |
| KFVNKSYLL   | 9  | 0.1769  | SHQ1     | ENSG00000144736.14 | ENSP00000315182.8 | 8.4  | 1731 |
| RYIHKLYDL   | 9  | 0.0583  | DOCK4    | ENSG00000128512.22 | ENSP00000499282.1 | 36.8 | 2694 |
| MYIRYIHKL   | 9  | 0.0063  | DOCK4    | ENSG00000128512.22 | ENSP00000499282.1 | 36.8 | 2694 |
| KYGDMRVTM   | 9  | 0.1194  | DOCK4    | ENSG00000128512.22 | ENSP00000499282.1 | 36.8 | 2694 |
| RFIGATANF   | 9  | 0.0477  | RNASEH2C | ENSG00000172922.9  | ENSP00000308193.4 | 22.4 | 492  |
| HYILHNSFF   | 9  | 0.0389  | TIPARP   | ENSG00000163659.13 | ENSP00000420612.1 | 11.4 | 1971 |
| VTSEDTRIK   | 9  | 45.5000 | DHX33    | ENSG00000005100.13 | ENSP00000225296.3 | 8.4  | 2121 |
| YYLNEIQSF   | 9  | 0.0017  | SPATC1L  | ENSG00000160284.15 | ENSP00000333869.6 | 10.5 | 558  |
| SYDPDFNQL   | 9  | 0.0814  | FTSJ1    | ENSG00000068438.15 | ENSP00000326948.2 | 23.0 | 987  |
| EVMHVSTAY   | 10 | 9.4976  | FAR1     | ENSG00000197601.13 | ENSP00000437111.1 | 24.2 | 1005 |
| AYSRVQYQF   | 9  | 0.0024  | BCAR3    | ENSG00000137936.18 | ENSP00000359264.1 | 23.1 | 2475 |
| VYAKVTHLF   | 9  | 0.0004  | ANO4     | ENSG00000151572.18 | ENSP00000494481.1 | 7.5  | 3363 |
| VYPERTPLL   | 9  | 0.0092  | HLA-DOB  | ENSG00000241106.8  | ENSP00000496848.1 | 9.3  | 819  |
| IYDTSTDRLLW | 11 | 0.2313  | ISG20    | ENSG00000172183.15 | ENSP00000306565.5 | 22.3 | 543  |
| VYKPAQNSW   | 9  | 0.0224  | KBTD7    | ENSG00000120696.8  | ENSP00000368797.3 | 6.5  | 2052 |
| EYIKFLRSI   | 9  | 0.1105  | HDAC2    | ENSG00000196591.12 | ENSP00000357621.2 | 22.3 | 1374 |
| IFTDVALKF   | 9  | 0.0213  | GTF3C4   | ENSG00000125484.12 | ENSP00000361219.4 | 7.1  | 2466 |
| KYADLSHNRL  | 10 | 0.1365  | RARS     | ENSG00000113643.9  | ENSP00000231572.3 | 35.5 | 1980 |

|              |    |         |            |                    |                    |      |      |
|--------------|----|---------|------------|--------------------|--------------------|------|------|
| KYPVEWAKF    | 9  | 0.0055  | ZC2HC1A    | ENSG00000104427.12 | ENSP00000263849.3  | 7.5  | 975  |
| VYNNSSRF     | 9  | 0.0213  | MYO10      | ENSG00000145555.15 | ENSP00000274203.10 | 10.7 | 6207 |
| NYSLIDKHL    | 9  | 0.2876  | ARHGAP10   | ENSG00000071205.11 | ENSP00000336923.3  | 18.7 | 2358 |
| RYQALFHDF    | 9  | 0.0059  | VCPIP1     | ENSG00000175073.8  | ENSP00000309031.4  | 6.4  | 3666 |
| RYLNKAFHI    | 9  | 0.0183  | NCAPD3     | ENSG00000151503.12 | ENSP00000433681.2  | 15.6 | 4494 |
| EVTGFGVTR    | 9  | 23.1250 | KLC4       | ENSG00000137171.15 | ENSP00000418546.1  | 78.0 | 135  |
| EAIMKVLQR    | 9  | 21.9091 | SYTL2      | ENSG00000137501.17 | ENSP00000435238.1  | 35.1 | 2730 |
| VYADKLLNI    | 9  | 0.0118  | CTDSPL2    | ENSG00000137770.14 | ENSP00000260327.4  | 15.5 | 1398 |
| NYIKDLNIL    | 9  | 0.1257  | CTDSPL2    | ENSG00000137770.14 | ENSP00000260327.4  | 15.5 | 1398 |
| DTITETDLR    | 9  | 43.5000 | RBM22      | ENSG00000086589.12 | ENSP00000199814.4  | 50.5 | 1260 |
| YQFGEIRTI    | 9  | 1.3180  | RBM22      | ENSG00000086589.12 | ENSP00000199814.4  | 50.5 | 1260 |
| LYGRHFNYL    | 9  | 0.1117  | TENT4B     | ENSG00000121274.12 | ENSP00000455837.1  | 7.2  | 1764 |
| SYARHFLDF    | 9  | 0.0206  | ZADH2      | ENSG00000180011.7  | ENSP00000323678.3  | 22.7 | 1131 |
| YYLLKNEQF    | 9  | 0.0044  | EPG5       | ENSG00000152223.15 | ENSP00000282041.4  | 12.5 | 7737 |
| SYTSVLSRL    | 9  | 0.0565  | EPG5       | ENSG00000152223.15 | ENSP00000282041.4  | 12.5 | 7737 |
| KYPHYFPLL    | 9  | 0.0063  | AC006538.1 | ENSG00000172009.15 | ENSP00000304467.5  | 22.3 | 2067 |
| TYVIYAHL     | 9  | 0.0434  | HECTD2     | ENSG00000165338.16 | ENSP00000298068.5  | 7.8  | 2328 |
| GYSEHFVEF    | 9  | 0.0065  | GMPR       | ENSG00000137198.9  | ENSP00000259727.4  | 6.2  | 1035 |
| AWAPKPYHKF   | 10 | 0.0280  | TNIK       | ENSG00000154310.17 | ENSP00000399511.2  | 11.7 | 4080 |
| NYSNVSIHL    | 9  | 0.0769  | CCDC82     | ENSG00000149231.14 | ENSP00000498266.1  | 17.0 | 1563 |
| IYHKLKHKFKF  | 10 | 0.0942  | CCDC82     | ENSG00000149231.14 | ENSP00000498266.1  | 17.0 | 1563 |
| RYDPHLNRW    | 9  | 0.0184  | KLHL26     | ENSG00000167487.12 | ENSP00000300976.3  | 6.4  | 1845 |
| NYIPYLTKL    | 9  | 0.0120  | SAMD9      | ENSG00000205413.8  | ENSP00000369292.2  | 6.3  | 4767 |
| KETFYKHSPEAF | 12 | 1.2259  | GALNT15    | ENSG00000131386.19 | ENSP00000344260.5  | 6.8  | 1917 |
| SNQMLVPVI    | 9  | 10.3015 | WDR3       | ENSG00000065183.16 | ENSP00000308179.4  | 6.8  | 2829 |
| AYLNITKHL    | 9  | 0.0573  | POLK       | ENSG00000122008.15 | ENSP00000423526.1  | 12.9 | 1281 |
| SYPSAFSKL    | 9  | 0.0211  | MARF1      | ENSG00000166783.22 | ENSP00000450309.1  | 45.9 | 5226 |

|             |    |         |         |                    |                   |      |       |
|-------------|----|---------|---------|--------------------|-------------------|------|-------|
| NYKSHHLQL   | 9  | 0.1715  | CWF19L1 | ENSG00000095485.18 | ENSP00000326411.6 | 17.1 | 1614  |
| RYLPHEELF   | 9  | 0.0027  | ZNF45   | ENSG00000124459.12 | ENSP00000481895.1 | 16.2 | 2046  |
| SYLTQHQR    | 9  | 0.0377  | ZNF264  | ENSG00000083844.10 | ENSP00000263095.5 | 8.2  | 1881  |
| KYQHLKAEF   | 9  | 0.0187  | EEA1    | ENSG00000102189.16 | ENSP00000317955.8 | 5.9  | 4233  |
| VYVQELQKL   | 9  | 0.0133  | EEA1    | ENSG00000102189.16 | ENSP00000317955.8 | 5.9  | 4233  |
| QYGEVANLL   | 9  | 0.0729  | VPS53   | ENSG00000141252.20 | ENSP00000401435.2 | 10.4 | 2496  |
| EAFPSQGTKR  | 10 | 18.0000 | VPS53   | ENSG00000141252.20 | ENSP00000401435.2 | 10.4 | 2496  |
| RYNHITATY   | 9  | 0.1472  | SNRK    | ENSG00000163788.14 | ENSP00000296088.7 | 21.1 | 2295  |
| RYNHITATYF  | 10 | 0.0305  | SNRK    | ENSG00000163788.14 | ENSP00000296088.7 | 21.1 | 2295  |
| VYATMPINSF  | 10 | 0.0113  | ZNF148  | ENSG00000163848.19 | ENSP00000353863.4 | 10.8 | 2382  |
| RYKGPGEYF   | 10 | 0.0083  | RPUSD2  | ENSG00000166133.18 | ENSP00000323288.7 | 10.8 | 1635  |
| KYITDVVKL   | 9  | 0.0227  | UTP20   | ENSG00000120800.5  | ENSP00000261637.4 | 6.1  | 8355  |
| SYLPISPTF   | 9  | 0.0007  | SLC23A2 | ENSG00000089057.15 | ENSP00000344322.1 | 6.8  | 1950  |
| QYMELFNKI   | 9  | 0.0087  | MED20   | ENSG00000124641.16 | ENSP00000265350.4 | 7.9  | 636   |
| VYNPVAEWF   | 9  | 0.0093  | KBTBD6  | ENSG00000165572.7  | ENSP00000368799.1 | 5.6  | 2022  |
| KYELDFSHF   | 9  | 0.0484  | TLR2    | ENSG00000137462.8  | ENSP00000494425.1 | 9.9  | 2352  |
| VYSIVPQSW   | 9  | 0.0078  | LARP4   | ENSG00000161813.22 | ENSP00000293618.8 | 11.2 | 1959  |
| KYLEETNSL   | 9  | 0.0234  | L3MBTL3 | ENSG00000198945.7  | ENSP00000437185.1 | 6.9  | 2265  |
| EAIGTLTAR   | 9  | 26.1000 | APBB3   | ENSG00000113108.19 | ENSP00000349177.2 | 43.0 | 1473  |
| RYSVASFKF   | 9  | 0.0048  | MYORG   | ENSG00000164976.9  | ENSP00000297625.8 | 5.5  | 2142  |
| EYFRVPDSATF | 11 | 0.0650  | VPS13B  | ENSG00000132549.18 | ENSP00000349685.2 | 18.5 | 11991 |
| EYTLMRATF   | 9  | 0.1153  | IRS2    | ENSG00000185950.9  | ENSP00000365016.3 | 5.5  | 4014  |
| KYIEGVSDF   | 9  | 0.0087  | IPP     | ENSG00000197429.10 | ENSP00000379739.3 | 8.0  | 1752  |
| RYGRFRKF    | 8  | 0.5504  | DCAF11  | ENSG00000100897.17 | ENSP00000452898.1 | 31.6 | 1638  |
| KYYDKKYQVF  | 10 | 0.0196  | FGGY    | ENSG00000172456.17 | ENSP00000360262.4 | 21.4 | 1725  |
| VYTGIDHHW   | 9  | 0.0124  | DCAF13  | ENSG00000164934.14 | ENSP00000297579.5 | 13.3 | 1791  |
| RYSGNQVLF   | 9  | 0.0057  | RAPGEF6 | ENSG00000158987.20 | ENSP00000421684.1 | 9.8  | 4803  |

|            |    |         |          |                    |                   |      |      |
|------------|----|---------|----------|--------------------|-------------------|------|------|
| NYENKQYLF  | 9  | 0.0346  | WDR66    | ENSG00000158023.10 | ENSP00000380595.2 | 15.9 | 2823 |
| IYPMKNHMF  | 9  | 0.0089  | RALGAPA1 | ENSG00000174373.16 | ENSP00000450574.1 | 16.2 | 1068 |
| RQIKINEV   | 8  | 13.0541 | TWF1     | ENSG00000151239.13 | ENSP00000378886.2 | 24.3 | 1050 |
| SYANIKEKL  | 9  | 0.0550  | MTERF1   | ENSG00000127989.13 | ENSP00000384986.2 | 9.0  | 1137 |
| LYQDGVFKF  | 9  | 0.0022  | AKTIP    | ENSG00000166971.17 | ENSP00000300245.4 | 23.6 | 879  |
| LYEKDIQLF  | 9  | 0.0241  | AKTIP    | ENSG00000166971.17 | ENSP00000300245.4 | 23.6 | 879  |
| AYLVHIEHL  | 9  | 0.0239  | MCC      | ENSG00000171444.18 | ENSP00000305617.4 | 8.7  | 2487 |
| AYGKDFHLI  | 9  | 0.0208  | MIER1    | ENSG00000198160.14 | ENSP00000347514.3 | 9.8  | 1536 |
| IYQKAFEHL  | 9  | 0.0057  | BBS4     | ENSG00000140463.14 | ENSP00000268057.4 | 22.6 | 1557 |
| QYASAFHFL  | 9  | 0.0114  | BBS4     | ENSG00000140463.14 | ENSP00000268057.4 | 22.6 | 1557 |
| LYAHTIAGF  | 9  | 0.0549  | CTDP1    | ENSG00000060069.16 | ENSP00000075430.7 | 19.4 | 2601 |
| KYADKIYSI  | 9  | 0.0033  | FOLH1    | ENSG00000086205.18 | ENSP00000256999.2 | 11.3 | 2250 |
| SYLKDTKLW  | 9  | 0.0551  | STK24    | ENSG00000102572.14 | ENSP00000442539.2 | 27.9 | 1293 |
| IYLPEVRKI  | 9  | 0.0098  | TULP4    | ENSG00000130338.13 | ENSP00000356064.3 | 7.6  | 4629 |
| EYVKFLHKF  | 9  | 0.0036  | ZNF506   | ENSG00000081665.14 | ENSP00000440625.1 | 15.9 | 1332 |
| TYSPALNKMF | 10 | 0.0206  | TP53     | ENSG00000141510.17 | ENSP00000478219.1 | 17.2 | 1062 |
| RYQEVDRRF  | 9  | 0.0112  | YTHDC1   | ENSG00000083896.12 | ENSP00000339245.4 | 78.7 | 2181 |
| KYVKVFHKF  | 9  | 0.0007  | ZNF680   | ENSG00000173041.12 | ENSP00000309330.6 | 6.7  | 1590 |
| RYINNPLLI  | 9  | 0.0196  | TLL5     | ENSG00000119685.20 | ENSP00000298832.9 | 12.9 | 3843 |
| TYIQKIFRM  | 9  | 0.0217  | ACOX3    | ENSG00000087008.16 | ENSP00000348775.4 | 13.5 | 2100 |
| IYFEYSHAF  | 9  | 0.0022  | MSH3     | ENSG00000113318.11 | ENSP00000499502.1 | 11.0 | 3216 |
| VYVQPPEL   | 9  | 0.0205  | BBS9     | ENSG00000122507.20 | ENSP00000388114.1 | 12.7 | 1362 |
| EYLGKLVRF  | 9  | 0.0124  | RSAD2    | ENSG00000134321.12 | ENSP00000371471.3 | 6.8  | 1083 |
| VYSFGFERL  | 9  | 0.0620  | SLC30A6  | ENSG00000152683.14 | ENSP00000349563.4 | 7.2  | 1296 |
| SYYSPSIGF  | 9  | 0.0205  | YTHDF2   | ENSG00000198492.16 | ENSP00000362918.3 | 9.8  | 1737 |
| YLEHPLLL   | 8  | 0.8666  | TTL      | ENSG00000114999.8  | ENSP00000233336.5 | 6.6  | 1131 |
| KYLEHPLLL  | 9  | 0.0043  | TTL      | ENSG00000114999.8  | ENSP00000233336.5 | 6.6  | 1131 |

|            |    |         |            |                    |                   |       |       |
|------------|----|---------|------------|--------------------|-------------------|-------|-------|
| VYAEVSRLLL | 10 | 0.1287  | TTL        | ENSG00000114999.8  | ENSP00000233336.5 | 6.6   | 1131  |
| HSTIMPRL   | 8  | 16.4909 | MCM4       | ENSG00000104738.18 | ENSP00000497093.1 | 13.7  | 2247  |
| VYAVVRGLF  | 9  | 0.0388  | MFSD13A    | ENSG00000138111.14 | ENSP00000238936.3 | 8.5   | 1551  |
| LYRLQFNEF  | 9  | 0.1323  | ARL4A      | ENSG00000122644.13 | ENSP00000379899.2 | 12.2  | 600   |
| TQVTVQKI   | 8  | 14.9111 | UVRAG      | ENSG00000198382.9  | ENSP00000348455.3 | 26.0  | 2097  |
| EVPSFLVERM | 10 | 12.1736 | MKS1       | ENSG00000011143.16 | ENSP00000376827.2 | 36.8  | 1677  |
| KYLDEKLAL  | 9  | 0.1352  | BAIAP3     | ENSG00000007516.13 | ENSP00000380625.2 | 12.5  | 3507  |
| IYPEVVHMF  | 9  | 0.0005  | PPP2R5C    | ENSG00000078304.19 | ENSP00000408389.3 | 44.8  | 1347  |
| SYVNHLVI   | 9  | 0.0396  | RAPGEF5    | ENSG00000136237.19 | ENSP00000479340.1 | 23.9  | 1332  |
| SYLIQHQR   | 9  | 0.0091  | ZNF71      | ENSG00000197951.9  | ENSP00000328245.5 | 5.8   | 1467  |
| AYLESFYKF  | 9  | 0.0009  | ATP6V0D1   | ENSG00000159720.12 | ENSP00000290949.3 | 155.4 | 1053  |
| LYPEGLAQL  | 9  | 0.0651  | ATP6V0D1   | ENSG00000159720.12 | ENSP00000290949.3 | 155.4 | 1053  |
| KYVKVIHKF  | 9  | 0.0009  | AC008554.1 | ENSG00000237440.9  | ENSP00000395733.3 | 7.4   | 1608  |
| IYRAQLELF  | 9  | 0.0197  | FAM126B    | ENSG00000155744.9  | ENSP00000393667.2 | 6.3   | 1590  |
| EYPKFLKRF  | 9  | 0.0262  | COL4A3BP   | ENSG00000113163.16 | ENSP00000369862.5 | 16.3  | 1572  |
| SQRLARLV   | 8  | 31.1667 | IDO1       | ENSG00000131203.13 | ENSP00000430950.1 | 7.3   | 1209  |
| RYMPPAHRNF | 10 | 0.0021  | IDO1       | ENSG00000131203.13 | ENSP00000430950.1 | 7.3   | 1209  |
| RYAEAVQLL  | 9  | 0.0058  | TTC30A     | ENSG00000197557.7  | ENSP00000347915.4 | 4.6   | 1995  |
| VYVAGAPRF  | 9  | 0.0070  | ITGA11     | ENSG00000137809.17 | ENSP00000403392.2 | 6.6   | 3567  |
| KMPKFKMPSF | 10 | 0.4228  | AHNAK2     | ENSG00000185567.7  | ENSP00000353114.4 | 7.1   | 17385 |
| VYTLTTHL   | 9  | 0.0290  | C11orf80   | ENSG00000173715.16 | ENSP00000494645.1 | 16.2  | 1731  |
| KYVKVFHQF  | 9  | 0.0007  | ZNF486     | ENSG00000256229.8  | ENSP00000335042.7 | 4.8   | 1389  |
| IYTFPHASF  | 9  | 0.0101  | BTN3A3     | ENSG00000111801.16 | ENSP00000355238.3 | 59.7  | 1605  |
| VWSDVTPLEF | 10 | 0.0205  | MMP11      | ENSG00000099953.10 | ENSP00000408070.1 | 21.8  | 1062  |
| VYKTIMEQF  | 9  | 0.0045  | BAIAP2     | ENSG00000175866.15 | ENSP00000315685.7 | 26.0  | 1563  |
| KYGVFEESL  | 9  | 0.2812  | TRIM34     | ENSG00000258659.6  | ENSP00000402595.2 | 11.2  | 1464  |
| EYNTIKDKF  | 9  | 0.0842  | PARP15     | ENSG00000173200.13 | ENSP00000417214.2 | 5.9   | 2034  |

|            |    |         |           |                    |                   |      |      |
|------------|----|---------|-----------|--------------------|-------------------|------|------|
| EYLRQIFRL  | 9  | 0.0536  | SMPD4     | ENSG00000136699.19 | ENSP00000401648.1 | 54.3 | 2223 |
| SYIQRLLVQI | 9  | 0.0142  | SAMHD1    | ENSG00000101347.9  | ENSP00000493536.1 | 29.9 | 1878 |
| NYIEKVVAI  | 9  | 0.0630  | ABI1      | ENSG00000136754.17 | ENSP00000365308.3 | 26.5 | 1356 |
| KYFDNSQSL  | 9  | 0.0152  | TTC17     | ENSG00000052841.15 | ENSP00000299240.5 | 70.0 | 2868 |
| QYAVLLNRF  | 9  | 0.0115  | NSUN3     | ENSG00000178694.10 | ENSP00000318986.4 | 7.0  | 1020 |
| VYLDGIVRI  | 9  | 0.0109  | KIAA0895L | ENSG00000196123.13 | ENSP00000290881.7 | 57.0 | 1413 |
| HYAALAHYF  | 9  | 0.0053  | RHPN2     | ENSG00000131941.8  | ENSP00000254260.2 | 24.4 | 2058 |
| RYFDRAALF  | 9  | 0.0038  | WDR11     | ENSG00000120008.16 | ENSP00000263461.5 | 49.4 | 3672 |
| QALEVLKI   | 8  | 18.3684 | MOCS3     | ENSG00000124217.4  | ENSP00000244051.1 | 4.2  | 1380 |
| PEAKPLPTF  | 9  | 0.0240  | EP400     | ENSG00000183495.13 | ENSP00000374212.2 | 36.5 | 9369 |
| KYAALFSQM  | 9  | 0.0872  | SAMD4B    | ENSG00000179134.15 | ENSP00000470237.1 | 72.5 | 2076 |
| KYFDKVVTL  | 9  | 0.0039  | KIF7      | ENSG00000166813.15 | ENSP00000377934.3 | 4.7  | 4029 |
| RYLDASNEL  | 9  | 0.0559  | NEK4      | ENSG00000114904.13 | ENSP00000233027.5 | 9.9  | 2523 |
| RYQTKFRHL  | 9  | 0.0887  | CEP89     | ENSG00000121289.18 | ENSP00000465141.1 | 22.9 | 1284 |
| RYTEITREKF | 10 | 0.0135  | CEP89     | ENSG00000121289.18 | ENSP00000465141.1 | 22.9 | 1284 |
| VYSEKVMHMF | 10 | 0.0071  | MYO18A    | ENSG00000196535.16 | ENSP00000437073.1 | 41.3 | 6162 |
| HVVGQGVLHR | 10 | 35.0000 | OGFOD2    | ENSG00000111325.16 | ENSP00000442817.1 | 20.1 | 558  |
| EYIPKWEQF  | 9  | 0.0029  | C3orf14   | ENSG00000114405.10 | ENSP00000232519.5 | 8.7  | 384  |
| IYTKLNQKI  | 9  | 0.0210  | EXOC6     | ENSG00000138190.16 | ENSP00000260762.6 | 6.0  | 2412 |
| RLFQSVKLH  | 9  | 19.8387 | POT1      | ENSG00000128513.16 | ENSP00000377002.1 | 11.6 | 1509 |
| KYPHYFPVM  | 9  | 0.0445  | NLN       | ENSG00000123213.23 | ENSP00000423214.1 | 5.4  | 1800 |
| VYQNHVQHL  | 9  | 0.0069  | ARHGAP5   | ENSG00000100852.13 | ENSP00000371897.1 | 22.6 | 4506 |
| RYLADLPTL  | 9  | 0.0275  | CEP85     | ENSG00000130695.15 | ENSP00000391790.1 | 9.1  | 1305 |
| KYTAVVKMI  | 9  | 0.1167  | KIN       | ENSG00000151657.12 | ENSP00000368881.3 | 5.3  | 1179 |
| EVIGRLDTM  | 9  | 6.7761  | ADH1B     | ENSG00000196616.14 | ENSP00000306606.8 | 21.6 | 1125 |
| IYKIDFVRF  | 9  | 0.0145  | UNC119    | ENSG00000109103.11 | ENSP00000337040.3 | 15.8 | 720  |
| TYARNLPAF  | 9  | 0.0080  | TTI2      | ENSG00000129696.12 | ENSP00000411169.2 | 9.4  | 1524 |

|             |    |         |         |                    |                   |      |      |
|-------------|----|---------|---------|--------------------|-------------------|------|------|
| EIMEVAKER   | 9  | 26.0000 | ESS2    | ENSG00000100056.12 | ENSP00000252137.6 | 16.2 | 1428 |
| RYTERVDYL   | 9  | 0.0795  | USP13   | ENSG00000058056.9  | ENSP00000263966.3 | 4.1  | 2589 |
| KYLKVFYKF   | 9  | 0.0014  | ZNF254  | ENSG00000213096.10 | ENSP00000349494.3 | 4.8  | 1977 |
| SFTQKSHLF   | 9  | 0.0377  | ZNF175  | ENSG00000105497.8  | ENSP00000262259.2 | 5.0  | 2133 |
| SYVHKVPSF   | 9  | 0.0040  | MED13L  | ENSG00000123066.8  | ENSP00000281928.3 | 30.3 | 6630 |
| KYNANFVTF   | 9  | 0.0016  | KDM2A   | ENSG00000173120.15 | ENSP00000432786.1 | 67.4 | 3486 |
| VYEYVVERF   | 9  | 0.0088  | TUT4    | ENSG00000134744.14 | ENSP00000257177.4 | 32.7 | 4935 |
| SIVDSILMER  | 10 | 27.5000 | RBM25   | ENSG00000119707.14 | ENSP00000261973.7 | 44.7 | 2529 |
| RYFDVGLHNF  | 10 | 0.0031  | HHAT    | ENSG00000054392.13 | ENSP00000261458.3 | 6.3  | 1479 |
| EYVEKFYRI   | 9  | 0.0259  | RAD50   | ENSG00000113522.14 | ENSP00000368100.4 | 11.1 | 3936 |
| KYLTQHERI   | 9  | 0.0738  | ZNF473  | ENSG00000142528.16 | ENSP00000375697.1 | 4.6  | 2613 |
| SYNPAENAVLL | 11 | 0.2088  | COPA    | ENSG00000122218.16 | ENSP00000497433.1 | 91.4 | 1365 |
| KYLADLPTL   | 9  | 0.0317  | CEP85L  | ENSG00000111860.14 | ENSP00000357477.3 | 4.3  | 2415 |
| VYFPDQHINF  | 10 | 0.0037  | PARD3B  | ENSG00000116117.18 | ENSP00000484434.1 | 5.6  | 3207 |
| RYKEENNDHL  | 10 | 0.4608  | USP8    | ENSG00000138592.14 | ENSP00000412682.3 | 26.6 | 3036 |
| SYIEVSHGL   | 9  | 0.0316  | SYNPO2  | ENSG00000172403.11 | ENSP00000425496.1 | 11.5 | 3465 |
| VMPKKVFKI   | 9  | 0.1848  | XYLT1   | ENSG00000103489.11 | ENSP00000261381.6 | 3.7  | 2877 |
| SQLRTTVV    | 8  | 23.1875 | MTSS1   | ENSG00000170873.18 | ENSP00000367256.3 | 74.4 | 2190 |
| RYAEQISVL   | 9  | 0.0454  | CCDC121 | ENSG00000176714.9  | ENSP00000339087.2 | 5.0  | 834  |
| KYLTVKDYL   | 9  | 0.0991  | ATAD2   | ENSG00000156802.13 | ENSP00000287394.5 | 6.5  | 4170 |
| AYAIKEEL    | 9  | 0.1534  | ATAD2   | ENSG00000156802.13 | ENSP00000287394.5 | 6.5  | 4170 |
| VYSPLGSAYKL | 11 | 0.0942  | SLC38A9 | ENSG00000177058.12 | ENSP00000380074.2 | 7.9  | 1683 |
| IFHEKTSEF   | 9  | 0.0529  | SLC7A2  | ENSG00000003989.17 | ENSP00000419140.1 | 4.2  | 1974 |
| RYPDTIALTF  | 10 | 0.0026  | MAPKBP1 | ENSG00000137802.14 | ENSP00000397570.2 | 12.9 | 4524 |
| VYNDHSIYVW  | 10 | 0.0502  | MAPKBP1 | ENSG00000137802.14 | ENSP00000397570.2 | 12.9 | 4524 |
| KYVSSVLSF   | 9  | 0.0043  | LTN1    | ENSG00000198862.14 | ENSP00000478783.1 | 11.8 | 5436 |
| KYLDVKFEYL  | 10 | 0.0921  | PICK1   | ENSG00000100151.16 | ENSP00000385205.3 | 42.7 | 1245 |

|             |    |         |           |                    |                   |       |       |
|-------------|----|---------|-----------|--------------------|-------------------|-------|-------|
| SYISRTNQL   | 9  | 0.0234  | AHCTF1    | ENSG00000153207.15 | ENSP00000355464.1 | 13.3  | 6903  |
| EYDLIVHQL   | 9  | 0.1080  | VPS26A    | ENSG00000122958.15 | ENSP00000263559.6 | 28.8  | 981   |
| EVSWKVLER   | 9  | 21.6364 | PHKB      | ENSG00000102893.16 | ENSP00000313504.5 | 41.4  | 3279  |
| QYVDFHNQL   | 9  | 0.0552  | ERCC5     | ENSG00000134899.21 | ENSP00000498881.1 | 57.0  | 3558  |
| IFIQNSKLYF  | 10 | 0.1828  | SLC35A5   | ENSG00000138459.9  | ENSP00000417654.1 | 6.9   | 1272  |
| KYIDFDHVF   | 9  | 0.0027  | CRAMP1    | ENSG00000007545.15 | ENSP00000293925.5 | 10.1  | 3807  |
| TFTFSHATF   | 9  | 0.0994  | TRIM27    | ENSG00000204713.11 | ENSP00000366404.3 | 25.2  | 1539  |
| DTASIFSLK   | 9  | 24.9286 | CDK18     | ENSG00000117266.15 | ENSP00000353176.2 | 255.2 | 1422  |
| KYQEYTNEL   | 9  | 0.0277  | TBK1      | ENSG00000183735.10 | ENSP00000498341.1 | 19.7  | 2193  |
| IYKDSSTFL   | 9  | 0.0775  | METTL14   | ENSG00000145388.15 | ENSP00000373474.3 | 7.4   | 1368  |
| AQRSFRVSI   | 9  | 5.8930  | VPS13C    | ENSG00000129003.18 | ENSP00000249837.3 | 32.5  | 11130 |
| TYISWKEEL   | 9  | 0.0517  | VPS13C    | ENSG00000129003.18 | ENSP00000249837.3 | 32.5  | 11130 |
| IYHPDIQLL   | 9  | 0.0039  | VPS13C    | ENSG00000129003.18 | ENSP00000249837.3 | 32.5  | 11130 |
| SYVAGLPRF   | 9  | 0.0069  | KLHL36    | ENSG00000135686.13 | ENSP00000456743.1 | 38.0  | 1848  |
| RYPGKFYRV   | 9  | 0.0511  | MAP3K20   | ENSG00000091436.17 | ENSP00000364361.3 | 15.7  | 2400  |
| AWPKVLKI    | 8  | 1.0777  | EPB41L3   | ENSG00000082397.17 | ENSP00000441174.1 | 31.1  | 2649  |
| LYIANVAHF   | 9  | 0.0047  | SLC37A2   | ENSG00000134955.11 | ENSP00000384407.2 | 26.6  | 1503  |
| LYHNNNQFF   | 9  | 0.0149  | NFATC1    | ENSG00000131196.17 | ENSP00000316553.5 | 9.5   | 2436  |
| KYIENLDNITF | 11 | 0.0112  | ZFYVE16   | ENSG00000039319.17 | ENSP00000423663.1 | 13.5  | 4617  |
| VYERELQTF   | 9  | 0.0106  | EEF1AKMT2 | ENSG00000203791.15 | ENSP00000357829.2 | 7.3   | 873   |
| YYPKIEAI    | 9  | 0.0564  | PHF20L1   | ENSG00000129292.20 | ENSP00000378788.2 | 19.5  | 2976  |
| RYKPGEPITF  | 10 | 0.0074  | DENND1B   | ENSG00000213047.13 | ENSP00000479816.1 | 4.3   | 2325  |
| YLEKAIKI    | 8  | 2.3986  | USP7      | ENSG00000187555.15 | ENSP00000343535.4 | 53.6  | 3306  |
| TYLEKAIKI   | 9  | 0.0206  | USP7      | ENSG00000187555.15 | ENSP00000343535.4 | 53.6  | 3306  |
| AYLDKSPQF   | 9  | 0.0061  | DHX29     | ENSG00000067248.10 | ENSP00000481966.1 | 16.5  | 4110  |
| VYMELSQKL   | 9  | 0.0043  | FRMD6     | ENSG00000139926.15 | ENSP00000379068.2 | 7.5   | 1842  |
| KYIKEAVRL   | 9  | 0.0236  | FRMD6     | ENSG00000139926.15 | ENSP00000379068.2 | 7.5   | 1842  |

|            |    |         |          |                    |                   |       |       |
|------------|----|---------|----------|--------------------|-------------------|-------|-------|
| LYQKDFLRI  | 9  | 0.0559  | FRMD6    | ENSG00000139926.15 | ENSP00000379068.2 | 7.5   | 1842  |
| IYPTAPPRF  | 9  | 0.0031  | LYPLAL1  | ENSG00000143353.12 | ENSP00000355894.3 | 15.5  | 663   |
| RYAAQLPAL  | 9  | 0.1300  | PELP1    | ENSG00000141456.15 | ENSP00000460300.2 | 20.0  | 3390  |
| IYEQVFAKL  | 9  | 0.0513  | NRDE2    | ENSG00000119720.18 | ENSP00000346335.3 | 7.1   | 3492  |
| KYMDVVKERI | 10 | 0.1639  | DDX24    | ENSG00000089737.17 | ENSP00000481495.1 | 34.6  | 2577  |
| QYLTSVQQL  | 9  | 0.0226  | CEP97    | ENSG00000182504.11 | ENSP00000342510.3 | 3.1   | 2595  |
| IYIRHSNLM  | 9  | 0.0891  | EPB41    | ENSG00000159023.21 | ENSP00000348397.3 | 27.4  | 1866  |
| SYLNSVQRL  | 9  | 0.0162  | NUPL2    | ENSG00000136243.17 | ENSP00000415511.1 | 20.8  | 672   |
| TYLDKIKKF  | 9  | 0.0058  | SYNE2    | ENSG00000054654.16 | ENSP00000341781.4 | 100.6 | 20655 |
| TYVENLRLL  | 9  | 0.0305  | SYNE2    | ENSG00000054654.16 | ENSP00000341781.4 | 100.6 | 20655 |
| VYINTAQEF  | 9  | 0.0023  | DHPS     | ENSG00000095059.16 | ENSP00000482709.1 | 68.5  | 1110  |
| RYLSKVLEL  | 9  | 0.0106  | C15orf40 | ENSG00000169609.14 | ENSP00000307071.6 | 14.4  | 459   |
| AVIEQEVRR  | 10 | 35.7500 | CC2D2A   | ENSG00000048342.16 | ENSP00000421809.1 | 21.9  | 4860  |
| RYLTVATVF  | 9  | 0.0105  | TUBB6    | ENSG00000176014.12 | ENSP00000318697.4 | 33.3  | 1338  |
| IYKAPSENW  | 9  | 0.0213  | DNMT1    | ENSG00000130816.16 | ENSP00000345739.3 | 54.9  | 4848  |
| VFKEKHHSW  | 9  | 0.1530  | RNASEH2B | ENSG00000136104.20 | ENSP00000495755.1 | 14.1  | 867   |
| IFLNKTFQW  | 9  | 0.0262  | ALG10B   | ENSG00000175548.9  | ENSP00000310120.4 | 2.9   | 1419  |
| RYLETILEI  | 9  | 0.0123  | NAIP     | ENSG00000249437.7  | ENSP00000429545.1 | 15.1  | 4041  |
| EVVNYVQKR  | 9  | 28.0000 | RMI1     | ENSG00000178966.16 | ENSP00000317039.3 | 7.5   | 1875  |
| EYSKYLQQAF | 10 | 0.1837  | ZNF281   | ENSG00000162702.8  | ENSP00000356322.1 | 3.3   | 2685  |
| RMYEKALQI  | 9  | 0.7523  | TTC19    | ENSG00000011295.16 | ENSP00000261647.5 | 14.1  | 1140  |
| KYLTAQLVQF | 11 | 0.0526  | ELOVL2   | ENSG00000197977.4  | ENSP00000346693.3 | 2.5   | 888   |
| RYMEHLEKI  | 9  | 0.0075  | KIAA0895 | ENSG00000164542.12 | ENSP00000319251.6 | 4.1   | 1407  |
| TYHPGVVVF  | 9  | 0.0025  | CHORDC1  | ENSG00000110172.12 | ENSP00000319255.6 | 11.3  | 996   |
| GYPEVALHF  | 9  | 0.0050  | COPA     | ENSG00000122218.16 | ENSP00000357048.3 | 91.4  | 3699  |
| IYLRDPVQV  | 9  | 0.1470  | TPP2     | ENSG00000134900.12 | ENSP00000498955.1 | 24.3  | 3519  |
| QVYGLPDL   | 8  | 30.6667 | KLHL42   | ENSG00000087448.11 | ENSP00000370671.2 | 5.6   | 1515  |

|             |    |         |         |                    |                   |      |       |
|-------------|----|---------|---------|--------------------|-------------------|------|-------|
| SYRNSLDSF   | 9  | 0.0814  | ZNF326  | ENSG00000162664.17 | ENSP00000340796.4 | 7.4  | 1746  |
| KYALLLQEL   | 9  | 0.0286  | PLEKHG4 | ENSG00000196155.13 | ENSP00000398030.1 | 13.8 | 3330  |
| IQMSVQRI    | 8  | 6.7323  | POLR2B  | ENSG00000047315.16 | ENSP00000312735.5 | 55.0 | 3522  |
| EVIEMVRKR   | 9  | 23.6875 | ROR1    | ENSG00000185483.12 | ENSP00000441637.2 | 3.0  | 2646  |
| RYLNKSFVL   | 9  | 0.0373  | ANKEF1  | ENSG00000132623.16 | ENSP00000367631.3 | 2.4  | 2328  |
| SFSTVHEKF   | 9  | 0.0219  | WDR36   | ENSG00000134987.11 | ENSP00000479950.1 | 5.3  | 2853  |
| AYLTVHQRI   | 9  | 0.0237  | ZNF570  | ENSG00000171827.10 | ENSP00000331540.1 | 3.0  | 1608  |
| RYMNHMQSL   | 9  | 0.0187  | ARIH1   | ENSG00000166233.15 | ENSP00000369217.4 | 16.2 | 1671  |
| RYFDGNLEKL  | 10 | 0.0944  | ARIH1   | ENSG00000166233.15 | ENSP00000369217.4 | 16.2 | 1671  |
| RYMNHMQSLRF | 11 | 0.0475  | ARIH1   | ENSG00000166233.15 | ENSP00000369217.4 | 16.2 | 1671  |
| KYLSGLVQW   | 9  | 0.0113  | EMC3    | ENSG00000125037.12 | ENSP00000408803.1 | 28.2 | 609   |
| LYKDVRDLL   | 9  | 0.1675  | ANKZF1  | ENSG00000163516.13 | ENSP00000386337.3 | 66.4 | 2178  |
| VYSLIKNKI   | 9  | 0.0528  | PRKAG2  | ENSG00000106617.14 | ENSP00000287878.3 | 20.9 | 1707  |
| VYILQPEVI   | 9  | 0.0364  | CPLANE1 | ENSG00000197603.14 | ENSP00000498265.1 | 9.9  | 6852  |
| SQYPQPKL    | 8  | 5.3959  | GBGT1   | ENSG00000148288.13 | ENSP00000493832.1 | 10.9 | 480   |
| KYMEDYHQF   | 9  | 0.0005  | PPL     | ENSG00000118898.16 | ENSP00000340510.2 | 3.6  | 5268  |
| VLPQRFQF    | 9  | 0.0393  | CNOT4   | ENSG00000080802.18 | ENSP00000399108.2 | 11.9 | 1716  |
| EVIGLLGGRY  | 10 | 39.0000 | MYSM1   | ENSG00000162601.11 | ENSP00000478391.1 | 13.4 | 702   |
| KYQRILERL   | 9  | 0.0301  | OPA1    | ENSG00000198836.10 | ENSP00000354681.3 | 14.7 | 2991  |
| VFVDSVPEF   | 9  | 0.0235  | INTS9   | ENSG00000104299.15 | ENSP00000429065.1 | 14.5 | 1974  |
| RYTTEFHEL   | 9  | 0.0150  | WEE1    | ENSG00000166483.11 | ENSP00000402084.2 | 5.3  | 1938  |
| EFVAKGHLF   | 9  | 0.1996  | MED18   | ENSG00000130772.14 | ENSP00000362948.4 | 4.0  | 624   |
| SYQKVIELF   | 9  | 0.0009  | PBK     | ENSG00000168078.10 | ENSP00000301905.4 | 2.3  | 966   |
| TYAEKLRHL   | 9  | 0.0099  | DST     | ENSG00000151914.20 | ENSP00000354508.3 | 33.1 | 22383 |
| IYTRLLPAL   | 9  | 0.1740  | ACY1    | ENSG00000243989.9  | ENSP00000419262.1 | 25.5 | 1029  |
| RYQEITKLQLF | 11 | 0.0053  | CCNDP1  | ENSG00000166946.14 | ENSP00000456041.1 | 61.1 | 426   |
| QQRLVVVSV   | 9  | 9.1359  | CIAO3   | ENSG00000103245.14 | ENSP00000457058.1 | 55.9 | 1122  |

|            |    |         |          |                    |                   |      |       |
|------------|----|---------|----------|--------------------|-------------------|------|-------|
| KYVTVYNLI  | 9  | 0.0238  | USP8     | ENSG00000138592.14 | ENSP00000302239.4 | 26.6 | 3354  |
| KYLLTPVNF  | 9  | 0.0028  | DCLRE1B  | ENSG00000118655.7  | ENSP00000498042.1 | 3.7  | 1596  |
| EYLKHHNRI  | 9  | 0.1628  | GZF1     | ENSG00000125812.16 | ENSP00000366250.2 | 4.4  | 2133  |
| RYNPNLNTW  | 9  | 0.0060  | KLHL11   | ENSG00000178502.6  | ENSP00000314608.3 | 1.4  | 2124  |
| KYTEITATYF | 10 | 0.0092  | AGL      | ENSG00000162688.17 | ENSP00000355106.3 | 5.2  | 4596  |
| SYLAIHQRI  | 9  | 0.0129  | ZNF665   | ENSG00000197497.11 | ENSP00000379702.2 | 5.9  | 2034  |
| KWFDNSNMTF | 10 | 0.0348  | CD302    | ENSG00000241399.7  | ENSP00000451446.2 | 12.8 | 585   |
| IYQDVTLKW  | 9  | 0.0040  | BBS9     | ENSG00000122507.20 | ENSP00000242067.6 | 12.7 | 2661  |
| RYQEMIQKL  | 9  | 0.0039  | SCLT1    | ENSG00000151466.12 | ENSP00000281142.5 | 7.0  | 2064  |
| SFITHSLKF  | 9  | 0.0430  | CEP192   | ENSG00000101639.18 | ENSP00000427550.1 | 11.3 | 7611  |
| HYINMPVQF  | 9  | 0.0032  | CEP192   | ENSG00000101639.18 | ENSP00000427550.1 | 11.3 | 7611  |
| IYVTGGHLF  | 9  | 0.0043  | KLHDC7B  | ENSG00000130487.8  | ENSP00000379034.2 | 1.6  | 1782  |
| KYGNFIDKL  | 9  | 0.0902  | GTPBP10  | ENSG00000105793.15 | ENSP00000222511.6 | 3.0  | 1161  |
| RVQDKYFHI  | 9  | 0.8341  | ABLIM2   | ENSG00000163995.20 | ENSP00000421283.1 | 5.0  | 1677  |
| VYIDKVRSL  | 9  | 0.0199  | LMNB1    | ENSG00000113368.12 | ENSP00000378761.1 | 20.1 | 1161  |
| SYANVQDGF  | 9  | 0.0646  | ANKRD22  | ENSG00000152766.6  | ENSP00000360998.4 | 1.3  | 573   |
| GYKAIHEYL  | 9  | 0.2256  | SYNE1    | ENSG00000131018.23 | ENSP00000356224.5 | 43.4 | 26391 |
| RYVDRVTEF  | 9  | 0.0042  | CDK5RAP3 | ENSG00000108465.15 | ENSP00000464286.1 | 43.6 | 816   |
| KYMETIEKL  | 9  | 0.0049  | PPP1R21  | ENSG00000162869.16 | ENSP00000415696.2 | 26.9 | 2214  |
| KYGVVIASF  | 9  | 0.0050  | DOCK4    | ENSG00000128512.22 | ENSP00000404179.1 | 36.8 | 5898  |
| LYTVNLHRI  | 9  | 0.1289  | SGSM1    | ENSG00000167037.18 | ENSP00000383211.4 | 3.4  | 3279  |
| LYEEINQVF  | 9  | 0.0325  | CYP20A1  | ENSG00000119004.15 | ENSP00000348380.4 | 8.2  | 1386  |
| IYPPKLHQF  | 9  | 0.0012  | CCNE1    | ENSG00000105173.14 | ENSP00000262643.3 | 3.0  | 1230  |
| NQIILNKV   | 8  | 21.5000 | LIN54    | ENSG00000189308.11 | ENSP00000341947.3 | 7.0  | 2247  |
| YYIFIPSKF  | 9  | 0.0026  | DDX47    | ENSG00000213782.7  | ENSP00000319578.6 | 39.5 | 1218  |
| KYVKDFHKF  | 9  | 0.0014  | ZNF724   | ENSG00000196081.9  | ENSP00000413411.1 | 1.1  | 1857  |
| VYVSRPSHF  | 9  | 0.0058  | STAT2    | ENSG00000170581.14 | ENSP00000450751.1 | 78.3 | 2541  |

|              |    |          |          |                    |                   |      |      |
|--------------|----|----------|----------|--------------------|-------------------|------|------|
| PYTTSTPNI    | 9  | 0.2942   | DOCK9    | ENSG00000088387.19 | ENSP00000401958.4 | 49.5 | 6243 |
| KYTHFIQSF    | 9  | 0.0021   | GBGT1    | ENSG00000148288.13 | ENSP00000361110.3 | 10.9 | 1041 |
| ETISQHIKR    | 10 | 41.5000  | GBGT1    | ENSG00000148288.13 | ENSP00000361110.3 | 10.9 | 1041 |
| DVAQEHLKER   | 10 | 53.7500  | GLI2     | ENSG00000074047.21 | ENSP00000354586.4 | 1.8  | 4758 |
| FYSRLLQKF    | 9  | 0.0046   | ZWILCH   | ENSG00000174442.12 | ENSP00000311429.5 | 3.3  | 1773 |
| DIIEKVMAR    | 9  | 19.8065  | TSC2     | ENSG00000103197.18 | ENSP00000496611.1 | 87.8 | 5307 |
| NYTLVSHLI    | 9  | 0.0455   | MARS     | ENSG00000166986.15 | ENSP00000262027.5 | 71.0 | 2700 |
| KYLQSTISF    | 9  | 0.0031   | TOP3B    | ENSG00000100038.19 | ENSP00000381773.2 | 22.2 | 2586 |
| DLFKAVDAALKK | 12 | 43.5000  | KNG1     | ENSG00000113889.14 | ENSP00000493985.1 | 1.5  | 1932 |
| AYANIISQF    | 9  | 0.0035   | SLC47A2  | ENSG00000180638.17 | ENSP00000338084.6 | 1.2  | 1740 |
| KYVKVFDKF    | 9  | 0.0034   | ZNF107   | ENSG00000196247.11 | ENSP00000378789.1 | 1.4  | 2349 |
| LYLRQTETL    | 9  | 0.0286   | ZBTB20   | ENSG00000181722.16 | ENSP00000349803.3 | 2.9  | 2004 |
| KYITEVSRW    | 9  | 0.0214   | CEP135   | ENSG00000174799.10 | ENSP00000257287.3 | 8.3  | 3420 |
| EVFTGGIGSY   | 10 | 15.8116  | TENT4B   | ENSG00000121274.12 | ENSP00000350054.4 | 7.2  | 909  |
| TPLTSMVVTKPD | 12 | 100.0000 | ITIH4    | ENSG00000055955.16 | ENSP00000266041.4 | 8.1  | 2790 |
| KYGDILHVI    | 9  | 0.0077   | DLG2     | ENSG00000150672.17 | ENSP00000381355.2 | 1.4  | 2610 |
| DIIAKVTRR    | 9  | 26.2000  | ARHGAP27 | ENSG00000159314.11 | ENSP00000437100.1 | 63.4 | 642  |
| TYLRKIPRF    | 9  | 0.0044   | CCDC14   | ENSG00000175455.15 | ENSP00000420180.3 | 22.1 | 2736 |
| KYVKVMHKF    | 9  | 0.0016   | ZNF138   | ENSG00000197008.9  | ENSP00000399528.1 | 6.3  | 861  |
| KFFRVLNSYKI  | 11 | 2.2546   | CHD5     | ENSG00000116254.18 | ENSP00000262450.3 | 0.2  | 5862 |
| KYWTEPEKF    | 9  | 0.0062   | CYP3A7   | ENSG00000160870.14 | ENSP00000479282.1 | 1.6  | 1509 |
| FLAEGGGVR    | 9  | 36.3333  | FGA      | ENSG00000171560.16 | ENSP00000385981.3 | 0.1  | 1932 |
| FTSSTSYNR    | 9  | 17.6667  | FGA      | ENSG00000171560.16 | ENSP00000385981.3 | 0.1  | 1932 |
| KYGKVVWGF    | 8  | 0.2160   | CYP3A4   | ENSG00000160868.15 | ENSP00000498939.1 | 0.1  | 1509 |
| EYQKVWNLF    | 9  | 0.0077   | PARP12   | ENSG00000059378.12 | ENSP00000263549.3 | 57.7 | 2103 |
| KHNYELDFKAF  | 11 | 1.3328   | PARP12   | ENSG00000059378.12 | ENSP00000263549.3 | 57.7 | 2103 |
| YYEHVKARF    | 9  | 0.0315   | MLPH     | ENSG00000115648.14 | ENSP00000264605.3 | 3.9  | 1800 |

---

%rank, %rank score of NetMHCpan4.1; Expression, gene expression calculated using RNA-seq data; ORF length, nucleotide lengths of the open reading frame encoding the peptide

**Supplementary table 2: HLA-A24 ligands detected in the RCC17 normal tissue**

| Sequence     | Length | %rank   | Gene     | Ensembl gene ID    | Ensembl protein ID | Expression | ORF Length |
|--------------|--------|---------|----------|--------------------|--------------------|------------|------------|
| EYFESPFTI    | 9      | 0.0215  | MT-CO3   | ENSG00000198938.2  | ENSP00000354982.2  | 41345.3    | 783        |
| YHLPPSPKPMK  | 11     | 7.9334  | MT-ATP8  | ENSG00000228253.1  | ENSP00000355265.1  | 16160.4    | 204        |
| ESVGTMGNR    | 9      | 52.5000 | ALDOB    | ENSG00000136872.20 | ENSP00000497990.1  | 5531.6     | 1092       |
| TIQGLDGLSER  | 11     | 42.5000 | ALDOB    | ENSG00000136872.20 | ENSP00000497990.1  | 5531.6     | 1092       |
| RMPEFYNRF    | 9      | 0.0212  | ASS1     | ENSG00000130707.17 | ENSP00000253004.6  | 2606.0     | 1236       |
| QYAGKYVLF    | 9      | 0.0031  | GPX3     | ENSG00000211445.12 | ENSP00000484258.1  | 4704.2     | 675        |
| AYLPVNESF    | 9      | 0.0029  | EEF2     | ENSG00000167658.16 | ENSP00000307940.5  | 1569.4     | 2574       |
| RYFDPANGKF   | 10     | 0.0144  | EEF2     | ENSG00000167658.16 | ENSP00000307940.5  | 1569.4     | 2574       |
| LYLKVKGNVF   | 10     | 0.1685  | RPL19    | ENSG00000108298.11 | ENSP00000464538.1  | 1658.7     | 582        |
| AYVLNIVRF    | 9      | 0.0134  | ATP1B1   | ENSG00000143153.12 | ENSP00000356789.3  | 1688.5     | 909        |
| KFIDTTSKF    | 9      | 0.0212  | RPL3     | ENSG00000100316.16 | ENSP00000346001.3  | 1705.2     | 1209       |
| KYCQVIRVI    | 9      | 0.1831  | RPL3     | ENSG00000100316.16 | ENSP00000346001.3  | 1705.2     | 1209       |
| DVIGVTKGK    | 9      | 25.0000 | RPL3     | ENSG00000100316.16 | ENSP00000346001.3  | 1705.2     | 1209       |
| RYSSMAASF    | 9      | 0.0077  | PDZK1IP1 | ENSG00000162366.8  | ENSP00000294338.2  | 1488.6     | 342        |
| YENVPEEEGK   | 10     | 60.0000 | PDZK1IP1 | ENSG00000162366.8  | ENSP00000294338.2  | 1488.6     | 342        |
| YENVPEEEGKVR | 12     | 70.0000 | PDZK1IP1 | ENSG00000162366.8  | ENSP00000294338.2  | 1488.6     | 342        |
| YVHMVTHF     | 8      | 0.8009  | TMBIM6   | ENSG00000139644.13 | ENSP00000447030.1  | 1600.8     | 600        |
| EHGDQDYIW    | 9      | 2.7597  | TMBIM6   | ENSG00000139644.13 | ENSP00000447030.1  | 1600.8     | 600        |
| HYIRKYNRF    | 9      | 0.0164  | RPS11    | ENSG00000142534.7  | ENSP00000270625.1  | 1686.6     | 474        |
| VQNGKHFKE    | 9      | 0.2918  | FABP1    | ENSG00000163586.9  | ENSP00000295834.3  | 1063.0     | 381        |
| KWFFQKLRF    | 9      | 0.0894  | RPL27    | ENSG00000131469.14 | ENSP00000253788.4  | 1066.5     | 408        |
| KYQAVTATL    | 9      | 0.0175  | RPL13A   | ENSG00000142541.17 | ENSP00000375730.4  | 1635.9     | 609        |
| RLPEEWSQW    | 9      | 0.2153  | HSPB1    | ENSG00000106211.9  | ENSP00000248553.6  | 1075.6     | 615        |

|              |    |         |          |                    |                   |        |      |
|--------------|----|---------|----------|--------------------|-------------------|--------|------|
| DVIAQGIGKL   | 10 | 28.1250 | RPLP2    | ENSG00000177600.9  | ENSP00000322419.4 | 952.9  | 345  |
| IYNEALKG     | 8  | 19.8387 | S100A6   | ENSG00000197956.10 | ENSP00000357708.3 | 1100.2 | 270  |
| NRPIPQWIR    | 9  | 11.2826 | RPL39    | ENSG00000198918.8  | ENSP00000355315.3 | 892.7  | 153  |
| SQLRVAKV     | 8  | 21.5455 | RPL35    | ENSG00000136942.15 | ENSP00000259469.4 | 884.6  | 369  |
| IIEVDPDTKE   | 10 | 80.0000 | RPS17    | ENSG00000182774.13 | ENSP00000498019.1 | 849.6  | 405  |
| VYGPKNYL     | 9  | 0.0244  | ANPEP    | ENSG00000166825.14 | ENSP00000300060.6 | 894.0  | 2901 |
| QQSKILKV     | 8  | 18.0526 | HSP90AB1 | ENSG00000096384.20 | ENSP00000360709.5 | 719.0  | 2172 |
| EIAEAYLGY    | 9  | 16.4000 | HSPA1B   | ENSG00000204388.7  | ENSP00000364801.3 | 675.4  | 1923 |
| TVFDAKRLIGR  | 11 | 27.3000 | HSPA1B   | ENSG00000204388.7  | ENSP00000364801.3 | 675.4  | 1923 |
| DVIPTDIHQ    | 10 | 26.7000 | FBP1     | ENSG00000165140.10 | ENSP00000364475.4 | 657.8  | 1014 |
| EVTRVKAVR    | 9  | 37.6667 | TXNIP    | ENSG00000265972.5  | ENSP00000462521.1 | 654.2  | 1173 |
| SMRYFYTSV    | 9  | 12.8611 | HLA-B    | ENSG00000234745.11 | ENSP00000399168.2 | 906.6  | 1086 |
| VMAPRTVLL    | 9  | 0.4689  | HLA-B    | ENSG00000234745.11 | ENSP00000399168.2 | 906.6  | 1086 |
| GQFKTYAI     | 8  | 16.6727 | RPS21    | ENSG00000171858.18 | ENSP00000345957.3 | 837.7  | 249  |
| VMAPRTLLL    | 9  | 0.3778  | HLA-A    | ENSG00000206503.13 | ENSP00000366005.5 | 698.8  | 1095 |
| RFKEANNFL    | 9  | 0.3820  | RPL7     | ENSG00000147604.14 | ENSP00000339795.2 | 603.2  | 744  |
| DFFRDEAERIMR | 12 | 36.3333 | DPEP1    | ENSG00000015413.9  | ENSP00000261615.4 | 1230.0 | 1233 |
| LYWSHPRKF    | 9  | 0.0225  | RPS29    | ENSG00000213741.10 | ENSP00000245458.6 | 590.7  | 168  |
| EYMYQVMKF    | 9  | 0.0145  | MIOX     | ENSG00000100253.13 | ENSP00000216075.6 | 1212.8 | 855  |
| MYQVMKFNKF   | 10 | 0.1675  | MIOX     | ENSG00000100253.13 | ENSP00000216075.6 | 1212.8 | 855  |
| DIIQRMHLR    | 9  | 17.0667 | GNAS     | ENSG00000087460.25 | ENSP00000499392.1 | 720.5  | 960  |
| SYTSHTNEI    | 9  | 0.1620  | C7       | ENSG00000112936.18 | ENSP00000322061.9 | 506.5  | 2529 |
| DVKFGADARA   | 10 | 80.0000 | HSPD1    | ENSG00000144381.17 | ENSP00000340019.2 | 459.7  | 1719 |
| AKDVKFGADARA | 12 | 90.0000 | HSPD1    | ENSG00000144381.17 | ENSP00000340019.2 | 459.7  | 1719 |
| DINSRVEKPK   | 11 | 80.0000 | AQP1     | ENSG00000240583.12 | ENSP00000498806.1 | 639.9  | 597  |
| KYNDTFWKEF   | 10 | 0.0157  | HSP90B1  | ENSG00000166598.15 | ENSP00000299767.4 | 433.1  | 2409 |
| VQVTVPKI     | 8  | 11.5435 | A2M      | ENSG00000175899.14 | ENSP00000323929.7 | 384.5  | 4422 |

|             |    |         |          |                    |                    |        |       |
|-------------|----|---------|----------|--------------------|--------------------|--------|-------|
| IYKPGQTVKF  | 10 | 0.0098  | A2M      | ENSG00000175899.14 | ENSP00000323929.7  | 384.5  | 4422  |
| ELCDERVSSR  | 10 | 30.8333 | UQCRH    | ENSG00000173660.12 | ENSP00000309565.5  | 489.0  | 273   |
| VVYGVDRF    | 9  | 0.0215  | SLC6A19  | ENSG00000174358.16 | ENSP00000305302.10 | 359.8  | 1902  |
| SVIGFRATQR  | 10 | 25.6667 | SLC6A19  | ENSG00000174358.16 | ENSP00000305302.10 | 359.8  | 1902  |
| KYFSLPSVVF  | 10 | 0.0231  | UGT1A9   | ENSG00000241119.2  | ENSP00000346768.4  | 353.0  | 1590  |
| RYDEHAYKW   | 9  | 0.0111  | BBOX1    | ENSG00000129151.9  | ENSP00000433772.1  | 359.9  | 1161  |
| SYTNVYRMF   | 9  | 0.0100  | GLYATL1  | ENSG00000166840.13 | ENSP00000479741.1  | 550.9  | 906   |
| RWPKSAEF    | 9  | 0.0535  | RPL17    | ENSG00000265681.7  | ENSP00000462385.1  | 533.9  | 552   |
| GYNVKFDMF   | 9  | 0.1275  | GPX4     | ENSG00000167468.16 | ENSP00000483655.1  | 527.7  | 510   |
| VVRHQLLKT   | 9  | 55.0000 | COX7C    | ENSG00000127184.13 | ENSP00000247655.3  | 388.0  | 189   |
| LVVRHQLLKT  | 10 | 80.0000 | COX7C    | ENSG00000127184.13 | ENSP00000247655.3  | 388.0  | 189   |
| NYKKFYEQF   | 9  | 0.0105  | HSP90AA1 | ENSG00000080824.18 | ENSP00000335153.7  | 651.8  | 2562  |
| YIAHPKLGKR  | 10 | 36.6667 | RPL29    | ENSG00000162244.11 | ENSP00000294189.4  | 340.2  | 477   |
| KYPDAVATW   | 9  | 0.0027  | SPP1     | ENSG00000118785.14 | ENSP00000378517.3  | 2172.3 | 942   |
| HVIGLQMGSNR | 11 | 44.0000 | TAGLN    | ENSG00000149591.16 | ENSP00000376678.4  | 341.5  | 603   |
| TGYGRPRQIIS | 11 | 27.4000 | TAGLN    | ENSG00000149591.16 | ENSP00000376678.4  | 341.5  | 603   |
| AYKYIQELW   | 9  | 0.0402  | RPL15    | ENSG00000174748.21 | ENSP00000483260.1  | 521.3  | 612   |
| HSYSPRAI    | 8  | 23.0000 | PSMB4    | ENSG00000159377.11 | ENSP00000290541.6  | 257.0  | 792   |
| ELYDGPRQMGR | 11 | 17.2222 | CUBN     | ENSG00000107611.15 | ENSP00000367064.4  | 264.6  | 10869 |
| KYTPPPHHI   | 9  | 0.0036  | NDUFS5   | ENSG00000168653.11 | ENSP00000362058.3  | 423.4  | 318   |
| QQLTAMKV    | 8  | 32.6000 | MYH9     | ENSG00000100345.21 | ENSP00000216181.5  | 239.8  | 5880  |
| KYLYVDKNF   | 9  | 0.0370  | MYH9     | ENSG00000100345.21 | ENSP00000216181.5  | 239.8  | 5880  |
| HGLTVPLI    | 8  | 19.3871 | ATP6V0E1 | ENSG00000113732.9  | ENSP00000429690.1  | 238.2  | 243   |
| VYPVALVSF   | 9  | 0.0052  | CLCNKB   | ENSG00000184908.17 | ENSP00000364831.4  | 284.2  | 2061  |
| QQYRALTV    | 8  | 18.3421 | TUBB4B   | ENSG00000188229.6  | ENSP00000341289.4  | 240.2  | 1335  |
| RYLTVAAVF   | 9  | 0.0167  | TUBB4B   | ENSG00000188229.6  | ENSP00000341289.4  | 240.2  | 1335  |
| EYPDRIMNTF  | 10 | 0.0274  | TUBB4B   | ENSG00000188229.6  | ENSP00000341289.4  | 240.2  | 1335  |

|             |    |         |         |                    |                   |       |      |
|-------------|----|---------|---------|--------------------|-------------------|-------|------|
| TQFKWIHI    | 8  | 5.9304  | KHK     | ENSG00000138030.13 | ENSP00000260598.5 | 308.6 | 894  |
| HYEMLFNSF   | 9  | 0.0781  | PTH1R   | ENSG00000160801.14 | ENSP00000402723.1 | 387.0 | 1779 |
| DYVEGLRVF   | 9  | 0.1353  | MYL6    | ENSG00000092841.18 | ENSP00000446955.1 | 721.7 | 453  |
| ETIKGIQKR   | 9  | 21.4545 | ITM2B   | ENSG00000136156.15 | ENSP00000497221.1 | 384.3 | 798  |
| TYLPQSYLI   | 9  | 0.0033  | ITM2B   | ENSG00000136156.15 | ENSP00000497221.1 | 384.3 | 798  |
| EVMKAVKVG   | 10 | 29.5714 | PEPD    | ENSG00000124299.15 | ENSP00000498922.1 | 724.7 | 1566 |
| RYCTDTGVLF  | 10 | 0.0351  | PEPD    | ENSG00000124299.15 | ENSP00000498922.1 | 724.7 | 1566 |
| VFMPHGLGHFL | 11 | 0.4524  | PEPD    | ENSG00000124299.15 | ENSP00000498922.1 | 724.7 | 1566 |
| TYLPAGQSVLL | 11 | 0.0752  | PHB     | ENSG00000167085.11 | ENSP00000300408.3 | 228.5 | 816  |
| RYDPYTQRI   | 9  | 0.0229  | PAH     | ENSG00000171759.10 | ENSP00000448059.1 | 449.3 | 1356 |
| EYNHIFPLL   | 9  | 0.0466  | PAH     | ENSG00000171759.10 | ENSP00000448059.1 | 449.3 | 1356 |
| KYRVDFHNF   | 9  | 0.0277  | KCNJ1   | ENSG00000151704.15 | ENSP00000376432.2 | 323.3 | 1173 |
| SYMGHFDLL   | 9  | 0.0245  | SF3B5   | ENSG00000169976.6  | ENSP00000356541.2 | 212.0 | 258  |
| QYAIISEAW   | 9  | 0.0589  | CRYL1   | ENSG00000165475.15 | ENSP00000493784.1 | 433.2 | 795  |
| VMSILPKI    | 8  | 9.9324  | SERINC1 | ENSG00000111897.7  | ENSP00000342962.3 | 208.6 | 1359 |
| NYIDKVRFL   | 9  | 0.0729  | VIM     | ENSG00000026025.16 | ENSP00000224237.5 | 389.1 | 1398 |
| RISLPLPNF   | 9  | 0.8058  | VIM     | ENSG00000026025.16 | ENSP00000224237.5 | 389.1 | 1398 |
| KYMTAVVKLF  | 10 | 0.0213  | CYBA    | ENSG00000051523.11 | ENSP00000261623.3 | 224.8 | 585  |
| ELIQDITQR   | 9  | 20.9630 | MSN     | ENSG00000147065.17 | ENSP00000353408.5 | 204.7 | 1731 |
| KYGDFNKEV   | 9  | 0.7009  | MSN     | ENSG00000147065.17 | ENSP00000353408.5 | 204.7 | 1731 |
| EYALLYHTL   | 9  | 0.0333  | AOC1    | ENSG00000002726.20 | ENSP00000411613.2 | 421.4 | 2310 |
| EIINEDIAKR  | 10 | 49.0000 | PDIA6   | ENSG00000143870.12 | ENSP00000272227.3 | 202.1 | 1320 |
| SYANVKQWL   | 9  | 0.1450  | RAB1B   | ENSG00000174903.16 | ENSP00000310226.6 | 208.0 | 603  |
| ETIGEILKK   | 9  | 20.2222 | HNRNPK  | ENSG00000165119.21 | ENSP00000317788.4 | 327.4 | 1389 |
| AQYLLQNSV   | 9  | 8.6807  | HNRNPK  | ENSG00000165119.21 | ENSP00000317788.4 | 327.4 | 1389 |
| RYFVSEGFEF  | 10 | 0.0306  | GOT1    | ENSG00000120053.12 | ENSP00000359539.5 | 194.5 | 1239 |
| LYLHRQWLL   | 9  | 0.0501  | CYP4A11 | ENSG00000187048.13 | ENSP00000311095.4 | 266.1 | 1557 |

|               |    |         |           |                    |                   |       |      |
|---------------|----|---------|-----------|--------------------|-------------------|-------|------|
| EIAYS DVAKR   | 10 | 49.0000 | CLIC4     | ENSG00000169504.15 | ENSP00000363500.4 | 203.6 | 759  |
| IAYS DVAKRLTK | 12 | 28.8750 | CLIC4     | ENSG00000169504.15 | ENSP00000363500.4 | 203.6 | 759  |
| TYSAGH NLL    | 9  | 0.1310  | KL        | ENSG00000133116.8  | ENSP00000369442.3 | 192.4 | 3036 |
| AYLLTLGKF     | 9  | 0.0760  | CYFIP2    | ENSG00000055163.20 | ENSP00000479968.1 | 250.0 | 3759 |
| HQQVVSRI      | 8  | 15.9855 | SLC9A3R1  | ENSG00000109062.12 | ENSP00000262613.5 | 189.4 | 1074 |
| EVIEIMTDR     | 9  | 31.5000 | HNRNPA1   | ENSG00000135486.17 | ENSP00000341826.6 | 367.5 | 1116 |
| AYFQKPLLL     | 9  | 0.0125  | AGXT2     | ENSG00000113492.14 | ENSP00000231420.6 | 230.9 | 1542 |
| IYYFKANVF     | 9  | 0.0169  | ARPC3     | ENSG00000111229.16 | ENSP00000228825.7 | 198.4 | 534  |
| VYTTMAEHF     | 9  | 0.0049  | TSPAN1    | ENSG00000117472.10 | ENSP00000361072.1 | 383.1 | 723  |
| TYPENWRAF     | 9  | 0.0134  | EEF1G     | ENSG00000254772.10 | ENSP00000331901.4 | 279.4 | 1311 |
| IYSQTYFRF     | 9  | 0.0018  | TNFSF10   | ENSG00000121858.11 | ENSP00000241261.2 | 187.2 | 843  |
| TYFRFQEEI     | 9  | 0.0914  | TNFSF10   | ENSG00000121858.11 | ENSP00000241261.2 | 187.2 | 843  |
| TYVYFTNEL     | 9  | 0.1507  | TNFSF10   | ENSG00000121858.11 | ENSP00000241261.2 | 187.2 | 843  |
| SQVEILQRV     | 9  | 4.4332  | ID3       | ENSG00000117318.9  | ENSP00000363689.5 | 197.9 | 357  |
| AQLLQLKV      | 8  | 25.6667 | FKBP8     | ENSG00000105701.16 | ENSP00000476767.1 | 260.3 | 1239 |
| KYPDRVPI      | 9  | 0.0180  | GABARAPL2 | ENSG00000034713.8  | ENSP00000037243.2 | 176.9 | 351  |
| RYQDAIRVF     | 9  | 0.0072  | EIF3L     | ENSG00000100129.18 | ENSP00000384634.1 | 246.8 | 1398 |
| TYMGHTGAVW    | 10 | 0.1733  | EIF3I     | ENSG00000084623.11 | ENSP00000362688.1 | 177.6 | 975  |
| EYILVPSTF     | 9  | 0.0065  | CAPN2     | ENSG00000162909.18 | ENSP00000295006.5 | 202.9 | 2100 |
| SYKNGFLNL     | 9  | 0.0659  | UBA1      | ENSG00000130985.17 | ENSP00000338413.6 | 274.7 | 3174 |
| EIVSRVSKR     | 9  | 28.1250 | UBA1      | ENSG00000130985.17 | ENSP00000338413.6 | 274.7 | 3174 |
| YIIGLLQQR     | 9  | 13.5225 | FBXL5     | ENSG00000118564.14 | ENSP00000425472.1 | 184.3 | 1836 |
| NYTPYKYNL     | 9  | 0.0744  | HGD       | ENSG00000113924.12 | ENSP00000283871.5 | 239.2 | 1335 |
| VYTTQPGVQF    | 10 | 0.0260  | GALM      | ENSG00000143891.17 | ENSP00000272252.5 | 165.2 | 1026 |
| EVAPPEYHR     | 9  | 10.8168 | MORF4L1   | ENSG00000185787.14 | ENSP00000452717.1 | 253.4 | 705  |
| EVAPPEYHRK    | 10 | 20.9259 | MORF4L1   | ENSG00000185787.14 | ENSP00000452717.1 | 253.4 | 705  |
| VYGPLPQSF     | 9  | 0.0008  | COX4I1    | ENSG00000131143.8  | ENSP00000455301.1 | 481.3 | 324  |

|              |    |         |          |                    |                   |       |      |
|--------------|----|---------|----------|--------------------|-------------------|-------|------|
| EQRAIAKI     | 8  | 25.2500 | EIF4G2   | ENSG00000110321.17 | ENSP00000379778.2 | 218.4 | 2607 |
| HQLSLRTV     | 8  | 19.1290 | NPM1     | ENSG00000181163.13 | ENSP00000377408.2 | 340.4 | 777  |
| ECIPKATHER   | 9  | 20.4074 | PPP1R1A  | ENSG00000135447.17 | ENSP00000257905.8 | 160.1 | 513  |
| RYLQTLTTI    | 9  | 0.0160  | STOM     | ENSG00000148175.12 | ENSP00000286713.2 | 167.0 | 864  |
| ELLQGGTSR    | 9  | 26.0000 | BHLHE40  | ENSG00000134107.4  | ENSP00000256495.3 | 161.1 | 1236 |
| LDEEEDTHL    | 9  | 20.7407 | PODXL    | ENSG00000128567.17 | ENSP00000367817.3 | 197.9 | 1674 |
| YISEHEHF     | 8  | 0.4765  | CLPTM1   | ENSG00000104853.16 | ENSP00000443192.1 | 198.7 | 1701 |
| VYISEHEHF    | 9  | 0.0020  | CLPTM1   | ENSG00000104853.16 | ENSP00000443192.1 | 198.7 | 1701 |
| EVMRLVKGM    | 9  | 17.5778 | ASNA1    | ENSG00000198356.11 | ENSP00000481254.1 | 156.9 | 993  |
| RYLHTLQSL    | 9  | 0.0149  | NPHS2    | ENSG00000116218.12 | ENSP00000356587.4 | 148.3 | 1149 |
| DYLKNTYRL    | 9  | 0.0631  | DPP4     | ENSG00000197635.10 | ENSP00000353731.3 | 144.2 | 2298 |
| SSARVGLARART | 12 | 80.0000 | NAPSA    | ENSG00000131400.8  | ENSP00000253719.1 | 155.1 | 1260 |
| MQIRIHQI     | 8  | 6.1989  | DNAJA1   | ENSG00000086061.16 | ENSP00000369127.3 | 142.0 | 1191 |
| VQPRNWLLF    | 9  | 0.1451  | MPC1     | ENSG00000060762.19 | ENSP00000354223.6 | 220.7 | 327  |
| EVAQLIQGGR   | 10 | 60.0000 | MPC1     | ENSG00000060762.19 | ENSP00000354223.6 | 220.7 | 327  |
| REKTQPVTF    | 9  | 0.0563  | C11orf96 | ENSG00000187479.7  | ENSP00000479976.1 | 135.2 | 366  |
| DVIRPGMRR    | 9  | 27.1000 | DNAJB1   | ENSG00000132002.8  | ENSP00000254322.1 | 142.6 | 1020 |
| KYGPIRQI     | 8  | 0.5562  | SF3B6    | ENSG00000115128.7  | ENSP00000233468.4 | 139.2 | 375  |
| VYGFVREAL    | 9  | 0.2693  | UBXN6    | ENSG00000167671.12 | ENSP00000301281.5 | 143.5 | 1323 |
| IFRAPMDQ     | 9  | 30.1667 | MARC2    | ENSG00000117791.16 | ENSP00000355880.3 | 149.4 | 1005 |
| LIFRAPMDQ    | 10 | 80.0000 | MARC2    | ENSG00000117791.16 | ENSP00000355880.3 | 149.4 | 1005 |
| DLIGCIIGR    | 9  | 34.0000 | PCBP2    | ENSG00000197111.15 | ENSP00000456842.1 | 531.0 | 552  |
| TYQLGFHSI    | 9  | 0.0211  | PSMB6    | ENSG00000142507.10 | ENSP00000270586.3 | 147.7 | 717  |
| ETIHADSVAKR  | 11 | 28.8750 | MSRB1    | ENSG00000198736.11 | ENSP00000480943.1 | 125.1 | 345  |
| EVIQHRFESL   | 10 | 14.7111 | SPTBN1   | ENSG00000115306.16 | ENSP00000334156.5 | 224.4 | 6465 |
| TYISSVYHV    | 9  | 0.0593  | SLC17A3  | ENSG00000124564.17 | ENSP00000355307.6 | 178.6 | 1260 |
| DQNPDAALR    | 9  | 25.5833 | COPE     | ENSG00000105669.14 | ENSP00000262812.3 | 152.4 | 924  |

|            |    |         |         |                    |                   |       |      |
|------------|----|---------|---------|--------------------|-------------------|-------|------|
| FQYFVKVV   | 8  | 27.9000 | ERGIC3  | ENSG00000125991.19 | ENSP00000399124.1 | 312.8 | 1191 |
| ELIAKIPNF  | 9  | 0.9133  | SET     | ENSG00000119335.16 | ENSP00000318012.8 | 131.4 | 831  |
| YYFEGIKQTF | 10 | 0.0027  | AHSA1   | ENSG00000100591.8  | ENSP00000216479.3 | 144.7 | 1014 |
| IYISTLKTEF | 10 | 0.0238  | AHSA1   | ENSG00000100591.8  | ENSP00000216479.3 | 144.7 | 1014 |
| RYQKSTELL  | 9  | 0.0247  | H3F3A   | ENSG00000163041.11 | ENSP00000355781.1 | 240.4 | 408  |
| RYIANTVEL  | 9  | 0.0295  | RPN2    | ENSG00000118705.17 | ENSP00000237530.6 | 234.8 | 1893 |
| RYIPTAAAF  | 9  | 0.0046  | SEC61A1 | ENSG00000058262.10 | ENSP00000243253.3 | 112.9 | 1428 |
| QYNTYPIKL  | 9  | 0.0493  | SEC61A1 | ENSG00000058262.10 | ENSP00000243253.3 | 112.9 | 1428 |
| KYAPSGFYI  | 9  | 0.0119  | WDR1    | ENSG00000071127.17 | ENSP00000371890.2 | 188.5 | 1818 |
| RYNPITKRI  | 9  | 0.0169  | AOX1    | ENSG00000138356.14 | ENSP00000363832.2 | 112.6 | 4014 |
| YYDKHFTEF  | 9  | 0.0045  | ATP6V1A | ENSG00000114573.10 | ENSP00000273398.3 | 110.3 | 1851 |
| EYYDKHFTEF | 10 | 0.0239  | ATP6V1A | ENSG00000114573.10 | ENSP00000273398.3 | 110.3 | 1851 |
| YYQHIVTTL  | 9  | 0.0054  | PCYOX1  | ENSG00000116005.12 | ENSP00000387654.2 | 119.5 | 1515 |
| SLFAGGMLR  | 9  | 12.8264 | TMED9   | ENSG00000184840.11 | ENSP00000330945.6 | 107.7 | 705  |
| KYLSVQGQLF | 10 | 0.0077  | MTCH1   | ENSG00000137409.19 | ENSP00000362730.5 | 177.3 | 1167 |
| EVIKQLKEK  | 9  | 28.8750 | SBDS    | ENSG00000126524.10 | ENSP00000246868.2 | 112.5 | 750  |
| SQIPLSKI   | 8  | 10.3550 | XRCC5   | ENSG00000079246.16 | ENSP00000375977.2 | 109.6 | 2196 |
| RYLDGWNAI  | 9  | 0.0772  | CYP27A1 | ENSG00000135929.9  | ENSP00000258415.4 | 110.9 | 1593 |
| EVIDDFMTR  | 9  | 10.9466 | CYP27A1 | ENSG00000135929.9  | ENSP00000258415.4 | 110.9 | 1593 |
| TYGGSWKF   | 8  | 0.1706  | AIG1    | ENSG00000146416.18 | ENSP00000350509.4 | 126.5 | 714  |
| NYLNHWNHF  | 9  | 0.0085  | FN3K    | ENSG00000167363.14 | ENSP00000300784.7 | 126.6 | 927  |
| YIKHPVSL   | 8  | 1.2395  | PSMD8   | ENSG00000099341.11 | ENSP00000481136.1 | 119.8 | 1050 |
| VYIKHPVSL  | 9  | 0.0059  | PSMD8   | ENSG00000099341.11 | ENSP00000481136.1 | 119.8 | 1050 |
| EVAGIVAAR  | 9  | 22.3158 | ACOT7   | ENSG00000097021.19 | ENSP00000367086.2 | 201.1 | 1140 |
| KYNPTWHCI  | 9  | 0.0245  | DYNLL1  | ENSG00000088986.11 | ENSP00000242577.6 | 312.3 | 267  |
| KFNPVSFTW  | 9  | 0.0110  | KLHDC3  | ENSG00000124702.18 | ENSP00000313995.4 | 101.1 | 1146 |
| VYQEMPAQL  | 9  | 0.0119  | BCKDHA  | ENSG00000248098.12 | ENSP00000269980.2 | 104.5 | 1335 |

|            |    |         |          |                    |                   |       |      |
|------------|----|---------|----------|--------------------|-------------------|-------|------|
| ECIGNVKVM  | 9  | 24.8571 | ADH5     | ENSG00000197894.11 | ENSP00000296412.8 | 212.5 | 1122 |
| PYISNIYLI  | 9  | 0.0371  | PLOD1    | ENSG00000083444.17 | ENSP00000196061.4 | 101.4 | 2181 |
| RYLDKTEQW  | 9  | 0.0047  | C4A      | ENSG00000244731.8  | ENSP00000396688.2 | 253.2 | 5232 |
| YYPRVEYGF  | 9  | 0.0091  | C4A      | ENSG00000244731.8  | ENSP00000396688.2 | 253.2 | 5232 |
| HYPLNTVTF  | 9  | 0.0074  | TNS1     | ENSG00000079308.19 | ENSP00000498399.1 | 129.3 | 5481 |
| VYTSGIYNI  | 9  | 0.0158  | TNS1     | ENSG00000079308.19 | ENSP00000498399.1 | 129.3 | 5481 |
| RWFDKSFTF  | 9  | 0.0040  | CPT1A    | ENSG00000110090.13 | ENSP00000265641.4 | 101.9 | 2319 |
| DVYENLYAGR | 10 | 30.0000 | MAPKAPK2 | ENSG00000162889.10 | ENSP00000356070.3 | 101.0 | 1200 |
| LQLQLPRL   | 8  | 10.2137 | PSME1    | ENSG00000092010.15 | ENSP00000206451.6 | 188.9 | 747  |
| LYDIILKNF  | 9  | 0.0433  | PSME1    | ENSG00000092010.15 | ENSP00000206451.6 | 188.9 | 747  |
| NYTKAMRLF  | 9  | 0.0481  | ADI1     | ENSG00000182551.14 | ENSP00000333666.3 | 137.5 | 537  |
| RYVRKFVLM  | 9  | 0.0737  | CHMP2A   | ENSG00000130724.8  | ENSP00000469240.1 | 152.0 | 666  |
| NFTNVAATF  | 9  | 0.1463  | ACLY     | ENSG00000131473.17 | ENSP00000345398.1 | 105.6 | 3273 |
| SYLEAFYKF  | 9  | 0.0009  | ATP6V0D2 | ENSG00000147614.4  | ENSP00000285393.3 | 92.3  | 1050 |
| EVIPYTPAM  | 9  | 5.3868  | HMOX1    | ENSG00000100292.17 | ENSP00000216117.8 | 92.4  | 864  |
| HQAAIVSKI  | 9  | 3.7087  | CALD1    | ENSG00000122786.20 | ENSP00000354513.2 | 118.5 | 1614 |
| IQYALRTL   | 8  | 7.6586  | SARS     | ENSG00000031698.13 | ENSP00000234677.2 | 128.9 | 1542 |
| EVMQEVAQL  | 9  | 6.5793  | SARS     | ENSG00000031698.13 | ENSP00000234677.2 | 128.9 | 1542 |
| KYLDIPKML  | 9  | 0.0220  | ACTN4    | ENSG00000130402.12 | ENSP00000252699.2 | 583.1 | 2733 |
| VYVQHPITF  | 9  | 0.0016  | LITAF    | ENSG00000189067.12 | ENSP00000340118.5 | 108.6 | 483  |
| EVIEKLFAM  | 9  | 4.8930  | EPAS1    | ENSG00000116016.14 | ENSP00000263734.3 | 98.8  | 2610 |
| LYLKALEGF  | 9  | 0.0273  | EPAS1    | ENSG00000116016.14 | ENSP00000263734.3 | 98.8  | 2610 |
| QWPPDPLHF  | 10 | 0.0248  | EPAS1    | ENSG00000116016.14 | ENSP00000263734.3 | 98.8  | 2610 |
| TFLKARLV   | 8  | 7.3156  | SEMA3B   | ENSG00000012171.19 | ENSP00000480680.1 | 146.1 | 2262 |
| MWSPHPALF  | 10 | 0.0565  | DYNC112  | ENSG00000077380.15 | ENSP00000386591.1 | 104.3 | 1896 |
| ETPSWTGSGF | 10 | 4.5089  | LAMB2    | ENSG00000172037.14 | ENSP00000307156.4 | 183.4 | 5394 |
| KFIWTNHKF  | 9  | 0.0245  | NDUFA12  | ENSG00000184752.13 | ENSP00000330737.2 | 97.6  | 435  |

|              |    |         |          |                    |                   |       |      |
|--------------|----|---------|----------|--------------------|-------------------|-------|------|
| ELVSGVVAR    | 9  | 24.5000 | VAT1     | ENSG00000108828.16 | ENSP00000347872.2 | 105.8 | 1179 |
| EVVASIKAR    | 9  | 33.0000 | SLC9A3R2 | ENSG00000065054.14 | ENSP00000456895.1 | 158.8 | 678  |
| APQMDWNRKRE  | 11 | 65.0000 | SLC9A3R2 | ENSG00000065054.14 | ENSP00000456895.1 | 158.8 | 678  |
| KEKEPEKLDKL  | 11 | 7.7535  | SF3B2    | ENSG00000087365.15 | ENSP00000318861.6 | 133.9 | 2685 |
| VYCNLLHSNSF  | 11 | 0.1475  | PLPP1    | ENSG00000067113.17 | ENSP00000302229.8 | 103.4 | 852  |
| TYTDVTPRQF   | 10 | 0.0234  | STARD7   | ENSG00000084090.13 | ENSP00000338030.5 | 98.6  | 1110 |
| TYTDVTPRQFF  | 11 | 0.0277  | STARD7   | ENSG00000084090.13 | ENSP00000338030.5 | 98.6  | 1110 |
| MQVLVSRI     | 8  | 20.1852 | BCL2L1   | ENSG00000171552.13 | ENSP00000365230.2 | 130.2 | 699  |
| KYKGIFNGF    | 9  | 0.0226  | SLC25A3  | ENSG00000075415.12 | ENSP00000383898.3 | 178.2 | 1083 |
| VYQPEHMSF    | 9  | 0.0012  | MSRA     | ENSG00000175806.15 | ENSP00000429461.1 | 207.0 | 639  |
| ESITDVLVR    | 9  | 38.0000 | MCL1     | ENSG00000143384.13 | ENSP00000358022.2 | 91.3  | 1050 |
| ETAFQGMLR    | 9  | 29.8571 | MCL1     | ENSG00000143384.13 | ENSP00000358022.2 | 91.3  | 1050 |
| AYFKDFHLL    | 9  | 0.0062  | SLC13A1  | ENSG00000081800.9  | ENSP00000194130.2 | 91.5  | 1785 |
| EVNEAELLRR   | 10 | 45.5000 | CAVIN1   | ENSG00000177469.13 | ENSP00000349541.4 | 83.4  | 1170 |
| EVIEESRAER   | 10 | 45.0000 | CAVIN1   | ENSG00000177469.13 | ENSP00000349541.4 | 83.4  | 1170 |
| NYVKDLSRL    | 9  | 0.1965  | CTDSP1   | ENSG00000144579.7  | ENSP00000273062.2 | 145.1 | 783  |
| SYIEHIFEI    | 9  | 0.0059  | PEA15    | ENSG00000162734.12 | ENSP00000353660.4 | 87.2  | 390  |
| KYVPAIAHL    | 9  | 0.0073  | CPVL     | ENSG00000106066.15 | ENSP00000265394.5 | 103.0 | 1428 |
| KYVPAIAHLIHS | 12 | 6.9851  | CPVL     | ENSG00000106066.15 | ENSP00000265394.5 | 103.0 | 1428 |
| RYMDAWNTV    | 9  | 0.0783  | TIMM13   | ENSG00000099800.8  | ENSP00000215570.2 | 82.4  | 285  |
| RFIPRENGVYL  | 11 | 0.6566  | FLNA     | ENSG00000196924.17 | ENSP00000358872.4 | 171.2 | 7860 |
| TYTEVVTEF    | 9  | 0.0027  | AEBP1    | ENSG00000106624.11 | ENSP00000223357.3 | 102.7 | 3474 |
| LYANMFERL    | 9  | 0.0553  | FKBP4    | ENSG00000004478.8  | ENSP00000001008.4 | 87.7  | 1377 |
| EVLKALSQR    | 10 | 35.5000 | GADD45A  | ENSG00000116717.13 | ENSP00000360025.4 | 94.1  | 495  |
| EVVDFIQSKI   | 10 | 21.8182 | PPM1G    | ENSG00000115241.11 | ENSP00000342778.4 | 80.1  | 1638 |
| PYKVTQDEL    | 9  | 0.5289  | NCL      | ENSG00000115053.16 | ENSP00000318195.4 | 157.9 | 2130 |
| AVVDVRIGM    | 9  | 14.1222 | NCL      | ENSG00000115053.16 | ENSP00000318195.4 | 157.9 | 2130 |

|              |    |         |          |                    |                   |       |       |
|--------------|----|---------|----------|--------------------|-------------------|-------|-------|
| AVVDVRIGMTR  | 11 | 31.3333 | NCL      | ENSG00000115053.16 | ENSP00000318195.4 | 157.9 | 2130  |
| IYNHITTRV    | 9  | 0.1704  | ADD1     | ENSG00000087274.17 | ENSP00000421907.2 | 201.5 | 1896  |
| KQMRILHV     | 8  | 10.6412 | GNAS     | ENSG00000087460.25 | ENSP00000360136.3 | 720.5 | 1140  |
| TYQNDIALI    | 9  | 0.1291  | CFI      | ENSG00000205403.13 | ENSP00000378131.3 | 196.5 | 1773  |
| VYDDLKYVW    | 9  | 0.0175  | RENBP    | ENSG00000102032.13 | ENSP00000377303.3 | 129.1 | 1281  |
| VYGNERFIQYL  | 11 | 0.4116  | PICALM   | ENSG00000073921.18 | ENSP00000433846.1 | 128.0 | 1935  |
| VFMKSVKLEW   | 10 | 0.3481  | PRPF6    | ENSG00000101161.8  | ENSP00000266079.4 | 75.4  | 2823  |
| KYLELCVDL    | 9  | 0.3992  | EIF3A    | ENSG00000107581.13 | ENSP00000358140.3 | 75.6  | 4146  |
| DVIAALRSR    | 9  | 26.1000 | KIFC3    | ENSG00000140859.16 | ENSP00000438805.2 | 185.8 | 2172  |
| KWNPTAGVAF   | 10 | 0.1926  | POLR2C   | ENSG00000102978.13 | ENSP00000219252.4 | 81.3  | 825   |
| KYWDVPPPGF   | 10 | 0.0536  | U2AF2    | ENSG00000063244.12 | ENSP00000388475.1 | 96.6  | 1413  |
| KYIPICPVF    | 9  | 0.0044  | SLC23A1  | ENSG00000170482.17 | ENSP00000302701.4 | 90.6  | 1794  |
| EYTDVYPEI    | 9  | 0.0982  | MAGED2   | ENSG00000102316.17 | ENSP00000364198.1 | 179.1 | 1818  |
| RFPRTIHMTE   | 10 | 0.0242  | ACY1     | ENSG00000243989.9  | ENSP00000419830.1 | 398.1 | 684   |
| RSFQTSAI     | 8  | 22.3158 | ATP5MC2  | ENSG00000135390.19 | ENSP00000377878.4 | 155.5 | 423   |
| KMPKMKMPTF   | 10 | 0.3399  | AHNAK    | ENSG00000124942.14 | ENSP00000367263.4 | 75.7  | 17670 |
| KMPKVMPKPF   | 10 | 0.3886  | AHNAK    | ENSG00000124942.14 | ENSP00000367263.4 | 75.7  | 17670 |
| RYRGDYDRF    | 9  | 0.1135  | HNRNPUL2 | ENSG00000214753.3  | ENSP00000301785.5 | 71.1  | 2241  |
| VYLQNWSHVL   | 10 | 0.1293  | GPS1     | ENSG00000169727.12 | ENSP00000485035.1 | 125.8 | 1578  |
| KYQEVTTNNL   | 9  | 0.0116  | CAPRIN1  | ENSG00000135387.21 | ENSP00000434150.1 | 99.2  | 2127  |
| KYQEVTTNNLEF | 11 | 0.0154  | CAPRIN1  | ENSG00000135387.21 | ENSP00000434150.1 | 99.2  | 2127  |
| VQLRLNSI     | 8  | 12.9167 | PPP2R1A  | ENSG00000105568.18 | ENSP00000324804.6 | 113.2 | 1767  |
| EVCGQDITTK   | 10 | 49.0000 | PPP2R1A  | ENSG00000105568.18 | ENSP00000324804.6 | 113.2 | 1767  |
| EVISPDTER    | 10 | 30.0000 | COL6A2   | ENSG00000142173.15 | ENSP00000300527.4 | 106.4 | 3057  |
| SYNRTFMKL    | 9  | 0.0236  | MAN1A1   | ENSG00000111885.7  | ENSP00000357453.3 | 68.2  | 1959  |
| KYIDKTIRV    | 9  | 0.0893  | LSM7     | ENSG00000130332.15 | ENSP00000252622.8 | 97.8  | 309   |
| KYPSPFVVF    | 9  | 0.0015  | DHX9     | ENSG00000135829.17 | ENSP00000356520.3 | 74.0  | 3810  |

|             |    |         |          |                    |                   |       |      |
|-------------|----|---------|----------|--------------------|-------------------|-------|------|
| NYLVRINEI   | 9  | 0.1370  | DHX9     | ENSG00000135829.17 | ENSP00000356520.3 | 74.0  | 3810 |
| HVIVDEIHER  | 10 | 27.7000 | DHX9     | ENSG00000135829.17 | ENSP00000356520.3 | 74.0  | 3810 |
| DTISPTLGF   | 9  | 2.2759  | ARL2     | ENSG00000213465.8  | ENSP00000246747.4 | 106.5 | 552  |
| NYLDRFLSL   | 9  | 0.0387  | CCND1    | ENSG00000110092.3  | ENSP00000227507.2 | 68.7  | 885  |
| ETIPLTAEK   | 9  | 20.4074 | CCND1    | ENSG00000110092.3  | ENSP00000227507.2 | 68.7  | 885  |
| RYTQEIFSFS  | 9  | 0.0039  | SLC4A1   | ENSG00000004939.15 | ENSP00000262418.6 | 127.7 | 2733 |
| EVPREKLASR  | 10 | 31.8333 | LARP1    | ENSG00000155506.17 | ENSP00000336721.4 | 80.4  | 3057 |
| KYLSDNVHL   | 9  | 0.0732  | CDC37    | ENSG00000105401.9  | ENSP00000222005.1 | 106.8 | 1134 |
| EVIPPYYSY   | 9  | 2.6495  | TDP2     | ENSG00000111802.14 | ENSP00000367440.4 | 86.1  | 1086 |
| KYLATLETL   | 9  | 0.0213  | JAK1     | ENSG00000162434.12 | ENSP00000343204.4 | 66.3  | 3462 |
| SYMPTVSHL   | 9  | 0.0043  | BSCL2    | ENSG00000168000.14 | ENSP00000413209.1 | 86.2  | 1194 |
| AYLRIHAHF   | 9  | 0.0068  | BSCL2    | ENSG00000168000.14 | ENSP00000413209.1 | 86.2  | 1194 |
| RYPNRFKLW   | 9  | 0.0463  | CYB5R1   | ENSG00000159348.13 | ENSP00000356218.4 | 76.2  | 915  |
| EYFSYPVSL   | 9  | 0.0790  | SCNN1A   | ENSG00000111319.13 | ENSP00000353292.3 | 183.2 | 2184 |
| RLPETLPSL   | 9  | 0.4957  | SCNN1A   | ENSG00000111319.13 | ENSP00000353292.3 | 183.2 | 2184 |
| KYPLLLDNI   | 9  | 0.1412  | ARHGEF12 | ENSG00000196914.9  | ENSP00000432984.1 | 70.9  | 4323 |
| KWGPASQQI   | 9  | 0.1498  | HNF1B    | ENSG00000275410.5  | ENSP00000480291.1 | 106.2 | 1671 |
| YYLNDLERI   | 9  | 0.0630  | GNAI2    | ENSG00000114353.17 | ENSP00000312999.6 | 154.7 | 1065 |
| KYQEEFEHF   | 9  | 0.0016  | LMAN1    | ENSG00000074695.6  | ENSP00000251047.4 | 63.2  | 1530 |
| TVVGHWAGSR  | 10 | 44.0000 | FAM120A  | ENSG00000048828.17 | ENSP00000277165.5 | 76.5  | 3354 |
| VQPSKYHFL   | 9  | 0.2639  | MAGEF1   | ENSG00000177383.4  | ENSP00000315064.3 | 61.9  | 921  |
| FVIDSDHLGHR | 11 | 30.6667 | COASY    | ENSG00000068120.15 | ENSP00000393564.2 | 75.1  | 1692 |
| KYNMVSYLL   | 9  | 0.0247  | GPAT3    | ENSG00000138678.11 | ENSP00000378651.2 | 132.0 | 1302 |
| KYNPQFGDAFW | 11 | 0.2131  | GPAT3    | ENSG00000138678.11 | ENSP00000378651.2 | 132.0 | 1302 |
| KYGIVLKEF   | 9  | 0.0168  | GTF2F1   | ENSG00000125651.14 | ENSP00000377969.3 | 84.7  | 1551 |
| VYSRTFTW    | 8  | 0.1570  | MYO1C    | ENSG00000197879.17 | ENSP00000354283.2 | 77.8  | 3084 |
| KYMDVQDFD   | 9  | 0.0045  | MYO1C    | ENSG00000197879.17 | ENSP00000354283.2 | 77.8  | 3084 |

|            |    |         |         |                    |                   |       |      |
|------------|----|---------|---------|--------------------|-------------------|-------|------|
| VYSRTFTWL  | 9  | 0.0981  | MYO1C   | ENSG00000197879.17 | ENSP00000354283.2 | 77.8  | 3084 |
| NYPQSVPRL  | 9  | 0.0404  | MYO1C   | ENSG00000197879.17 | ENSP00000354283.2 | 77.8  | 3084 |
| AIVDVVANR  | 9  | 17.4222 | ANXA7   | ENSG00000138279.16 | ENSP00000362012.4 | 116.4 | 1398 |
| ESIGRVLQOR | 10 | 39.5000 | MRPL18  | ENSG00000112110.10 | ENSP00000356001.4 | 67.1  | 540  |
| YFKDTHPKF  | 9  | 0.0239  | CYB5R3  | ENSG00000100243.21 | ENSP00000338461.6 | 85.0  | 903  |
| EIISHDTRR  | 9  | 39.0000 | CYB5R3  | ENSG00000100243.21 | ENSP00000338461.6 | 85.0  | 903  |
| IYTSSVNRL  | 9  | 0.0348  | COPB2   | ENSG00000184432.10 | ENSP00000422295.1 | 83.5  | 2631 |
| TYPQGFKVW  | 9  | 0.0537  | CYP4F2  | ENSG00000186115.13 | ENSP00000221700.3 | 75.1  | 1560 |
| YYLTPDGQRF | 10 | 0.0090  | CYP4F2  | ENSG00000186115.13 | ENSP00000221700.3 | 75.1  | 1560 |
| VYIIGSSGF  | 9  | 0.0393  | SCCPDH  | ENSG00000143653.10 | ENSP00000355467.3 | 59.4  | 1287 |
| KYTGVLTEL  | 9  | 0.0483  | GLDC    | ENSG00000178445.9  | ENSP00000370737.3 | 104.4 | 3060 |
| TYMKEILRF  | 9  | 0.0014  | SLC17A5 | ENSG00000119899.13 | ENSP00000348019.5 | 58.4  | 1485 |
| KYIQKPGLL  | 9  | 0.0906  | PAQR7   | ENSG00000182749.5  | ENSP00000363414.3 | 57.7  | 1038 |
| IYEPLHTHW  | 9  | 0.0109  | PAQR7   | ENSG00000182749.5  | ENSP00000363414.3 | 57.7  | 1038 |
| YIQKPGLLGR | 10 | 23.4375 | PAQR7   | ENSG00000182749.5  | ENSP00000363414.3 | 57.7  | 1038 |
| GQWKKGFLV  | 9  | 2.7258  | SERBP1  | ENSG00000142864.14 | ENSP00000360034.2 | 104.3 | 1224 |
| YKYKLLPRS  | 9  | 56.6667 | MAOA    | ENSG00000189221.9  | ENSP00000340684.3 | 69.4  | 1581 |
| IYIAGHPAF  | 9  | 0.0099  | HNRNPL  | ENSG00000104824.17 | ENSP00000221419.4 | 153.0 | 1767 |
| AVASFPKKQE | 10 | 80.0000 | COX7A2  | ENSG00000112695.11 | ENSP00000359098.2 | 152.5 | 345  |
| IYNGDMEKI  | 9  | 0.1535  | BNIP3   | ENSG00000176171.11 | ENSP00000357625.5 | 70.0  | 777  |
| DVISSIRNF  | 9  | 1.7773  | TOMM5   | ENSG00000175768.13 | ENSP00000313584.6 | 57.9  | 153  |
| NYARGHYTI  | 9  | 0.0422  | TUBA1A  | ENSG00000167552.14 | ENSP00000446637.1 | 65.6  | 1248 |
| YIRGSKIRF  | 9  | 2.8192  | SNRPD3  | ENSG00000100028.12 | ENSP00000215829.3 | 59.7  | 378  |
| VYIRGSKIRF | 10 | 0.0309  | SNRPD3  | ENSG00000100028.12 | ENSP00000215829.3 | 59.7  | 378  |
| KYSDITIMF  | 9  | 0.0019  | GAMT    | ENSG00000130005.12 | ENSP00000492031.1 | 109.1 | 639  |
| ETAPAVLER  | 9  | 16.2545 | RGN     | ENSG00000130988.13 | ENSP00000253303.4 | 71.4  | 897  |
| LYSHLVDYF  | 9  | 0.0212  | GNA11   | ENSG00000088256.9  | ENSP00000078429.3 | 62.1  | 1077 |

|            |    |         |          |                    |                   |       |      |
|------------|----|---------|----------|--------------------|-------------------|-------|------|
| VYQNIPTAM  | 9  | 0.1127  | GNA11    | ENSG00000088256.9  | ENSP00000078429.3 | 62.1  | 1077 |
| YYIDKLEYL  | 9  | 0.0077  | NET1     | ENSG00000173848.19 | ENSP00000369717.3 | 59.9  | 1626 |
| KYPLLLKEI  | 9  | 0.0815  | NET1     | ENSG00000173848.19 | ENSP00000369717.3 | 59.9  | 1626 |
| DVRMGGSFR  | 9  | 48.0000 | NET1     | ENSG00000173848.19 | ENSP00000369717.3 | 59.9  | 1626 |
| NYVDLVSSL  | 9  | 0.1586  | ECI2     | ENSG00000198721.12 | ENSP00000417170.2 | 212.3 | 420  |
| GYLADPAKF  | 9  | 0.0404  | MRPL15   | ENSG00000137547.8  | ENSP00000260102.4 | 57.7  | 888  |
| RYPTTFVMV  | 9  | 0.1323  | ARL6IP5  | ENSG00000144746.7  | ENSP00000273258.3 | 54.9  | 564  |
| RYPDSHQLF  | 9  | 0.0020  | G3BP2    | ENSG00000138757.14 | ENSP00000350518.3 | 77.4  | 1347 |
| AYVPGFAHI  | 9  | 0.0192  | CUEDC2   | ENSG00000107874.11 | ENSP00000358953.4 | 67.9  | 861  |
| KYLRRLFRF  | 9  | 0.0142  | UNC50    | ENSG00000115446.11 | ENSP00000350409.2 | 57.6  | 777  |
| RYAEWEERI  | 9  | 0.0993  | GBA2     | ENSG00000070610.14 | ENSP00000367343.3 | 120.7 | 2781 |
| TYDNVHQQF  | 9  | 0.0055  | ARHGAP24 | ENSG00000138639.18 | ENSP00000378610.2 | 128.5 | 1959 |
| MYPDVFAHF  | 9  | 0.0008  | PC       | ENSG00000173599.14 | ENSP00000377527.2 | 70.0  | 3534 |
| EVIPPMKEF  | 9  | 1.2290  | NDUFB6   | ENSG00000165264.11 | ENSP00000369176.3 | 60.8  | 384  |
| RWSPVRPLVF | 10 | 0.0409  | WDR34    | ENSG00000119333.11 | ENSP00000361800.2 | 101.5 | 1608 |
| AYLEAIHNF  | 9  | 0.0009  | AP2S1    | ENSG00000042753.11 | ENSP00000263270.5 | 84.8  | 426  |
| VYTVVDEMF  | 9  | 0.0213  | AP2S1    | ENSG00000042753.11 | ENSP00000263270.5 | 84.8  | 426  |
| NYGPMKGSF  | 10 | 0.3896  | HNRNPA3  | ENSG00000170144.20 | ENSP00000408487.1 | 71.9  | 1068 |
| KYQKGFSLW  | 9  | 0.0098  | TRAM1    | ENSG00000067167.8  | ENSP00000262213.2 | 67.6  | 1122 |
| AYLLNLNHL  | 9  | 0.0529  | TRAM1    | ENSG00000067167.8  | ENSP00000262213.2 | 67.6  | 1122 |
| AYPHNLMTF  | 9  | 0.0041  | TRAM1    | ENSG00000067167.8  | ENSP00000262213.2 | 67.6  | 1122 |
| NYISDPTIL  | 9  | 0.1974  | TRAM1    | ENSG00000067167.8  | ENSP00000262213.2 | 67.6  | 1122 |
| RWFDKTLQF  | 9  | 0.0068  | CRAT     | ENSG00000095321.17 | ENSP00000315013.2 | 122.3 | 1878 |
| EYSKQMQRF  | 9  | 0.0416  | HDAC1    | ENSG00000116478.12 | ENSP00000362649.3 | 64.3  | 1446 |
| RMLPHAPGV  | 9  | 3.9079  | HDAC1    | ENSG00000116478.12 | ENSP00000362649.3 | 64.3  | 1446 |
| PYNDYFEYF  | 9  | 0.0117  | HDAC1    | ENSG00000116478.12 | ENSP00000362649.3 | 64.3  | 1446 |
| VYHHLVETL  | 9  | 0.0106  | GGT5     | ENSG00000099998.17 | ENSP00000381340.3 | 70.1  | 1761 |

|             |    |         |            |                    |                    |       |      |
|-------------|----|---------|------------|--------------------|--------------------|-------|------|
| HVVAPVLSR   | 9  | 18.0263 | GGT5       | ENSG00000099998.17 | ENSP00000381340.3  | 70.1  | 1761 |
| VYHHLVETLKF | 11 | 0.0541  | GGT5       | ENSG00000099998.17 | ENSP00000381340.3  | 70.1  | 1761 |
| VYAAGSQFHSF | 11 | 0.0123  | GPT        | ENSG00000167701.14 | ENSP00000378408.2  | 78.2  | 1488 |
| RYGDLVDYL   | 9  | 0.1140  | PDGFRB     | ENSG00000113721.14 | ENSP00000261799.4  | 68.7  | 3318 |
| TYGEIFEKF   | 9  | 0.0009  | NDUFC2     | ENSG00000151366.13 | ENSP00000281031.4  | 72.2  | 357  |
| LYADVGGKQF  | 10 | 0.1143  | SSR4       | ENSG00000180879.13 | ENSP00000359103.3  | 131.4 | 519  |
| TYIKSPPPFF  | 9  | 0.0020  | ACO1       | ENSG00000122729.19 | ENSP00000309477.5  | 60.0  | 2667 |
| HQQEISKI    | 8  | 14.2889 | CDC42BPB   | ENSG00000198752.11 | ENSP00000355237.2  | 60.3  | 5133 |
| KYVAEFLEW   | 9  | 0.0170  | CDC42BPB   | ENSG00000198752.11 | ENSP00000355237.2  | 60.3  | 5133 |
| VYAIAKNHYW  | 9  | 0.0144  | TM9SF3     | ENSG00000077147.16 | ENSP00000360184.4  | 54.8  | 1767 |
| EVINYEPICY  | 10 | 37.6667 | MYLK       | ENSG00000065534.18 | ENSP00000418335.1  | 130.1 | 5742 |
| QYLEEAPKF   | 9  | 0.0061  | TRAPPC6A   | ENSG00000007255.10 | ENSP00000468612.1  | 71.2  | 477  |
| KYLLADCNEAF | 11 | 0.3640  | RAD21      | ENSG00000164754.14 | ENSP00000297338.2  | 62.5  | 1893 |
| GYSPLYQLTW  | 9  | 0.0218  | NFKBIA     | ENSG00000100906.10 | ENSP00000450514.1  | 76.4  | 681  |
| KYEELFPAF   | 9  | 0.0153  | NAPA       | ENSG00000105402.8  | ENSP00000263354.2  | 80.5  | 885  |
| IYARAANMF   | 9  | 0.0084  | NAPA       | ENSG00000105402.8  | ENSP00000263354.2  | 80.5  | 885  |
| IYTDMGRFTI  | 10 | 0.2109  | NAPA       | ENSG00000105402.8  | ENSP00000263354.2  | 80.5  | 885  |
| RYSVFFQSL   | 9  | 0.0221  | PSMD6      | ENSG00000163636.10 | ENSP00000295901.4  | 61.1  | 1167 |
| SYVVAMETF   | 9  | 0.0110  | DDB1       | ENSG00000167986.13 | ENSP00000301764.7  | 164.1 | 3420 |
| LQFPVGRV    | 8  | 25.8333 | HIST2H2AA4 | ENSG00000272196.2  | ENSP00000475814.1  | 49.3  | 390  |
| QYLDRAEKL   | 9  | 0.0838  | VPS4A      | ENSG00000132612.16 | ENSP00000254950.11 | 55.2  | 1311 |
| RYLGKVLEL   | 9  | 0.0161  | CLUH       | ENSG00000132361.17 | ENSP00000464732.2  | 122.3 | 3753 |
| YYALEVSYF   | 9  | 0.0078  | COPS5      | ENSG00000121022.14 | ENSP00000350512.4  | 65.4  | 1002 |
| VFHPSQDLVF  | 10 | 0.1043  | PRPF19     | ENSG00000110107.9  | ENSP00000227524.4  | 56.6  | 1512 |
| IFKPPDPDNTF | 11 | 0.1027  | MOAP1      | ENSG00000165943.5  | ENSP00000298894.4  | 48.8  | 1053 |
| TYLKKIPGF   | 9  | 0.0076  | SERINC3    | ENSG00000132824.14 | ENSP00000340243.4  | 49.8  | 1419 |
| AQHKFLVAV   | 9  | 8.6933  | TCF25      | ENSG00000141002.20 | ENSP00000457329.1  | 153.3 | 795  |

|             |    |         |          |                    |                   |       |      |
|-------------|----|---------|----------|--------------------|-------------------|-------|------|
| HYQDVSLQF   | 10 | 0.0270  | WDR18    | ENSG0000065268.10  | ENSP00000466551.1 | 57.8  | 804  |
| GYPLWKVTF   | 9  | 0.0240  | PNP      | ENSG00000198805.11 | ENSP00000452421.1 | 278.6 | 663  |
| LQFPVGRI    | 8  | 16.9273 | H2AFZ    | ENSG00000164032.12 | ENSP00000296417.5 | 76.1  | 384  |
| RCAHIEAKF   | 9  | 3.0442  | NAP1L4   | ENSG00000205531.13 | ENSP00000436397.1 | 97.7  | 1158 |
| AYDTRWEF    | 9  | 0.0303  | DPP7     | ENSG00000176978.14 | ENSP00000360635.2 | 117.5 | 1476 |
| IYTRLLPAL   | 9  | 0.1740  | ACY1     | ENSG00000243989.9  | ENSP00000490149.1 | 398.1 | 1224 |
| RYLEQLHQL   | 9  | 0.0039  | STAT3    | ENSG00000168610.14 | ENSP00000264657.4 | 78.6  | 2310 |
| RYLEKPMEI   | 9  | 0.0074  | STAT3    | ENSG00000168610.14 | ENSP00000264657.4 | 78.6  | 2310 |
| RYLNEFEEL   | 9  | 0.0243  | EIF2AK1  | ENSG00000086232.13 | ENSP00000199389.6 | 48.5  | 1890 |
| SYLKDTKLW   | 9  | 0.0551  | STK24    | ENSG00000102572.14 | ENSP00000365730.3 | 68.2  | 1329 |
| VWNPRSHEKL  | 10 | 0.5127  | WDR6     | ENSG00000178252.18 | ENSP00000413432.1 | 70.0  | 3210 |
| LYMKNQGF    | 9  | 0.0203  | RAP1B    | ENSG00000127314.18 | ENSP00000445090.1 | 67.5  | 354  |
| TYQDIQNTI   | 9  | 0.0114  | POLR2A   | ENSG00000181222.16 | ENSP00000499521.1 | 57.3  | 5910 |
| VYASDRATF   | 9  | 0.0093  | ECI2     | ENSG00000198721.12 | ENSP00000369461.3 | 212.3 | 1182 |
| ELAYADVAKR  | 10 | 44.0000 | CLIC5    | ENSG00000112782.17 | ENSP00000344165.6 | 49.4  | 753  |
| RYLEVMRKL   | 9  | 0.0208  | PTPA     | ENSG00000119383.19 | ENSP00000351885.4 | 102.2 | 969  |
| KYSKRFPEL   | 9  | 0.0329  | PRPF31   | ENSG00000105618.14 | ENSP00000375635.1 | 60.4  | 1479 |
| VYFSAIQKI   | 9  | 0.0061  | BAIAP2L2 | ENSG00000128298.17 | ENSP00000371085.3 | 46.2  | 1587 |
| IYKSIMEQF   | 9  | 0.0032  | BAIAP2L2 | ENSG00000128298.17 | ENSP00000371085.3 | 46.2  | 1587 |
| EVVGEQVTSY  | 10 | 30.1667 | CNDP2    | ENSG00000133313.15 | ENSP00000462311.1 | 167.7 | 1425 |
| YYFDSYAHF   | 9  | 0.0014  | PRMT1    | ENSG00000126457.21 | ENSP00000406162.2 | 147.9 | 1113 |
| EYMLQNHVF   | 9  | 0.0320  | IPO7     | ENSG00000205339.10 | ENSP00000369042.3 | 55.4  | 3114 |
| KYLEMIYSM   | 9  | 0.0251  | IPO7     | ENSG00000205339.10 | ENSP00000369042.3 | 55.4  | 3114 |
| NYGRVFSEW   | 9  | 0.0341  | SNX4     | ENSG00000114520.11 | ENSP00000251775.4 | 47.3  | 1350 |
| RYLPTGSFPF  | 10 | 0.0172  | TUSC3    | ENSG00000104723.20 | ENSP00000424544.1 | 52.2  | 1044 |
| RYLPTGSFPFL | 11 | 0.1518  | TUSC3    | ENSG00000104723.20 | ENSP00000424544.1 | 52.2  | 1044 |
| VFAGVFNTF   | 9  | 0.0083  | F13A1    | ENSG00000124491.15 | ENSP00000264870.3 | 44.8  | 2196 |

|            |    |         |          |                    |                   |       |      |
|------------|----|---------|----------|--------------------|-------------------|-------|------|
| EYATKISRF  | 9  | 0.0315  | PITHD1   | ENSG00000057757.10 | ENSP00000246151.4 | 45.7  | 633  |
| EVVAKFLHK  | 9  | 21.3636 | PPP1CA   | ENSG00000172531.15 | ENSP00000365936.4 | 110.7 | 990  |
| KYPENFFLL  | 9  | 0.0032  | PPP1CA   | ENSG00000172531.15 | ENSP00000365936.4 | 110.7 | 990  |
| EYMKHTRLF  | 9  | 0.0160  | FLII     | ENSG00000177731.16 | ENSP00000438536.2 | 103.2 | 3642 |
| ETVDAVQER  | 9  | 25.5833 | SUN1     | ENSG00000164828.18 | ENSP00000409909.1 | 74.3  | 2130 |
| VYSPHVLNL  | 9  | 0.0042  | DNM2     | ENSG00000079805.16 | ENSP00000352721.6 | 119.9 | 2598 |
| KYLSGIAHF  | 9  | 0.0016  | PMPCA    | ENSG00000165688.12 | ENSP00000360782.3 | 60.2  | 1575 |
| RFLDDLGLKF | 10 | 0.1283  | DSG2     | ENSG00000046604.13 | ENSP00000261590.8 | 43.4  | 3354 |
| EYLKLLHSF  | 9  | 0.0058  | SREBF2   | ENSG00000198911.12 | ENSP00000354476.4 | 50.9  | 3423 |
| TYTDRVFFL  | 9  | 0.0326  | PLXNB2   | ENSG00000196576.15 | ENSP00000409171.1 | 297.5 | 5514 |
| YYTDIMHTL  | 9  | 0.0046  | PLXNB2   | ENSG00000196576.15 | ENSP00000409171.1 | 297.5 | 5514 |
| ETFDYIGSSR | 10 | 21.7273 | NCSTN    | ENSG00000162736.17 | ENSP00000294785.5 | 112.1 | 2127 |
| KYGSVTVW   | 8  | 0.3841  | PPP4C    | ENSG00000149923.14 | ENSP00000455995.1 | 74.8  | 921  |
| RYPDRITLI  | 9  | 0.0115  | PPP4C    | ENSG00000149923.14 | ENSP00000455995.1 | 74.8  | 921  |
| IYSIDFTRF  | 9  | 0.0066  | UNC119B  | ENSG00000175970.11 | ENSP00000344942.4 | 44.8  | 753  |
| RYQFTPAFL  | 9  | 0.0734  | UNC119B  | ENSG00000175970.11 | ENSP00000344942.4 | 44.8  | 753  |
| SQFSYQHAI  | 9  | 2.5023  | EIF3H    | ENSG00000147677.11 | ENSP00000428669.1 | 121.7 | 705  |
| RYQERFKHI  | 9  | 0.0756  | SPRYD3   | ENSG00000167778.9  | ENSP00000301463.4 | 45.0  | 1326 |
| TQYRAMFV   | 8  | 27.0000 | EAPP     | ENSG00000129518.9  | ENSP00000250454.3 | 45.8  | 855  |
| AYLESFYKF  | 9  | 0.0009  | ATP6V0D1 | ENSG00000159720.12 | ENSP00000441282.1 | 214.3 | 1176 |
| LYPEGLAQL  | 9  | 0.0651  | ATP6V0D1 | ENSG00000159720.12 | ENSP00000441282.1 | 214.3 | 1176 |
| VGARIYHTI  | 9  | 1.7211  | MGST1    | ENSG00000008394.13 | ENSP00000379513.3 | 166.0 | 465  |
| RYVLYPNNF  | 9  | 0.0080  | HEXA     | ENSG00000213614.9  | ENSP00000268097.5 | 87.9  | 1587 |
| SYLKQLPHF  | 9  | 0.0023  | SNRNP200 | ENSG00000144028.15 | ENSP00000317123.5 | 112.4 | 6408 |
| KYVHLFPKL  | 9  | 0.0203  | SNRNP200 | ENSG00000144028.15 | ENSP00000317123.5 | 112.4 | 6408 |
| ETQLPVSEFR | 9  | 24.0000 | SNRNP200 | ENSG00000144028.15 | ENSP00000317123.5 | 112.4 | 6408 |
| YMDWYEKF   | 9  | 0.0007  | SNRNP200 | ENSG00000144028.15 | ENSP00000317123.5 | 112.4 | 6408 |

|             |    |         |          |                    |                   |       |      |
|-------------|----|---------|----------|--------------------|-------------------|-------|------|
| IYTDQAGQWRI | 11 | 0.4904  | C12orf10 | ENSG00000139637.14 | ENSP00000267103.5 | 65.0  | 1128 |
| YYTSVTPVL   | 9  | 0.0425  | PTBP1    | ENSG00000011304.20 | ENSP00000342332.5 | 115.6 | 1581 |
| EVFDFSQRR   | 9  | 14.6556 | NFE2L2   | ENSG00000116044.16 | ENSP00000411575.2 | 72.7  | 1746 |
| RYPTSIASL   | 9  | 0.0318  | BUB3     | ENSG00000154473.18 | ENSP00000357851.5 | 54.3  | 978  |
| SFHNIHNTF   | 9  | 0.0220  | BUB3     | ENSG00000154473.18 | ENSP00000357851.5 | 54.3  | 978  |
| RYPTSIASLAF | 11 | 0.0548  | BUB3     | ENSG00000154473.18 | ENSP00000357851.5 | 54.3  | 978  |
| RYISQTQGL   | 9  | 0.0723  | HIPK2    | ENSG00000064393.16 | ENSP00000385571.3 | 42.7  | 3594 |
| YQRDPLKL    | 8  | 2.9613  | STAT6    | ENSG00000166888.12 | ENSP00000451546.2 | 115.7 | 2595 |
| IYQRDPLKL   | 9  | 0.0232  | STAT6    | ENSG00000166888.12 | ENSP00000451546.2 | 115.7 | 2595 |
| QYMKIISSE   | 9  | 0.0035  | HSPA4    | ENSG00000170606.15 | ENSP00000302961.2 | 53.7  | 2520 |
| YVVEKVLDR   | 9  | 21.2727 | CBX1     | ENSG00000108468.15 | ENSP00000225603.4 | 44.2  | 555  |
| TYMDAQLFKKV | 11 | 0.8788  | RGL1     | ENSG00000143344.15 | ENSP00000354097.3 | 40.7  | 2304 |
| SYIELPAYL   | 9  | 0.0221  | LAPTM5   | ENSG00000162511.8  | ENSP00000294507.3 | 40.9  | 786  |
| SYMEVPTYL   | 9  | 0.0073  | LAPTM5   | ENSG00000162511.8  | ENSP00000294507.3 | 40.9  | 786  |
| VYSEVAAYEF  | 10 | 0.0130  | DRG1     | ENSG00000185721.12 | ENSP00000329715.4 | 41.3  | 1101 |
| FVVEKVLDR   | 9  | 27.9000 | CBX3     | ENSG00000122565.19 | ENSP00000387348.1 | 69.8  | 303  |
| YAHIIHQHF   | 9  | 0.7868  | MOB1A    | ENSG00000114978.18 | ENSP00000379364.3 | 43.2  | 648  |
| VYAHIIHQHF  | 10 | 0.0089  | MOB1A    | ENSG00000114978.18 | ENSP00000379364.3 | 43.2  | 648  |
| QYTHKIYHL   | 9  | 0.0221  | PITPNA   | ENSG00000174238.14 | ENSP00000316809.7 | 53.5  | 810  |
| TYLMLANHL   | 9  | 0.0856  | GBE1     | ENSG00000114480.13 | ENSP00000410833.2 | 41.5  | 2106 |
| VYADTIKDLL  | 10 | 0.1813  | ACOT11   | ENSG00000162390.17 | ENSP00000340260.2 | 47.9  | 1782 |
| EVFDKTYQFL  | 10 | 3.6101  | RRP36    | ENSG00000124541.7  | ENSP00000244496.5 | 46.1  | 777  |
| NYMDCISSL   | 9  | 0.1751  | BICC1    | ENSG00000122870.11 | ENSP00000362993.3 | 40.1  | 2922 |
| FYPYGLQTF   | 9  | 0.0102  | SUN2     | ENSG00000100242.15 | ENSP00000385616.1 | 102.5 | 2214 |
| KYKEAAHLL   | 9  | 0.0110  | KLC4     | ENSG00000137171.15 | ENSP00000395806.2 | 79.1  | 1626 |
| RYNPENNTW   | 9  | 0.0220  | IVNS1ABP | ENSG00000116679.16 | ENSP00000356468.3 | 181.6 | 1926 |
| DVTSCISYR   | 9  | 38.0000 | IVNS1ABP | ENSG00000116679.16 | ENSP00000356468.3 | 181.6 | 1926 |

|              |    |         |          |                    |                   |       |      |
|--------------|----|---------|----------|--------------------|-------------------|-------|------|
| EWSPTYTKIFQF | 11 | 0.3630  | IVNS1ABP | ENSG00000116679.16 | ENSP00000356468.3 | 181.6 | 1926 |
| EVATFFAKM    | 9  | 8.7311  | TOP1     | ENSG00000198900.6  | ENSP00000354522.2 | 38.9  | 2295 |
| VYNENLVHMI   | 10 | 0.2172  | BCAS2    | ENSG00000116752.6  | ENSP00000358554.3 | 40.6  | 675  |
| KYMAEALLL    | 9  | 0.0244  | TOMM70   | ENSG00000154174.7  | ENSP00000284320.5 | 40.6  | 1824 |
| HYAYSFKYL    | 9  | 0.1651  | SUPT6H   | ENSG00000109111.15 | ENSP00000319104.6 | 42.8  | 5178 |
| HQIVVDRV     | 8  | 26.1000 | SEMA3G   | ENSG00000010319.6  | ENSP00000231721.2 | 42.3  | 2346 |
| TYVTEVREL    | 9  | 0.1220  | KTN1     | ENSG00000126777.18 | ENSP00000391964.2 | 126.3 | 3900 |
| VYNANINLF    | 9  | 0.0025  | PKD2     | ENSG00000118762.8  | ENSP00000237596.2 | 41.9  | 2904 |
| LYIVHPTMF    | 9  | 0.0088  | ARHGAP1  | ENSG00000175220.12 | ENSP00000310491.4 | 40.0  | 1317 |
| KYVADFSQF    | 9  | 0.0069  | KCNJ15   | ENSG00000157551.19 | ENSP00000381905.1 | 164.3 | 1125 |
| MWKEGNRIHF   | 10 | 0.2915  | HSD17B4  | ENSG00000133835.16 | ENSP00000425993.1 | 168.3 | 1797 |
| TYDKGYQF     | 8  | 0.1860  | PEX5     | ENSG00000139197.10 | ENSP00000266564.3 | 51.0  | 1893 |
| EVFNKFFKER   | 10 | 25.0833 | SUPT16H  | ENSG00000092201.10 | ENSP00000216297.2 | 39.9  | 3141 |
| RYFYKVHQL    | 9  | 0.0092  | BSDC1    | ENSG00000160058.18 | ENSP00000397759.2 | 63.3  | 1341 |
| TYNYPVHYF    | 9  | 0.0034  | TMEM30A  | ENSG00000112697.16 | ENSP00000230461.6 | 51.3  | 1083 |
| TYIPVPAKI    | 9  | 0.0036  | ST3GAL1  | ENSG00000008513.16 | ENSP00000428540.1 | 52.5  | 1020 |
| KYFQGDQLQF   | 10 | 0.0077  | PDK2     | ENSG00000005882.11 | ENSP00000007708.3 | 131.1 | 1029 |
| TYQRWQFTL    | 9  | 0.0189  | PRPF8    | ENSG00000174231.17 | ENSP00000304350.6 | 84.6  | 7005 |
| EIRDIILGM    | 9  | 17.3556 | PRPF8    | ENSG00000174231.17 | ENSP00000304350.6 | 84.6  | 7005 |
| RYIDRIHIF    | 9  | 0.0010  | PRPF8    | ENSG00000174231.17 | ENSP00000304350.6 | 84.6  | 7005 |
| VYTTTVHWL    | 9  | 0.0444  | PRPF8    | ENSG00000174231.17 | ENSP00000304350.6 | 84.6  | 7005 |
| ETIHRKSY     | 9  | 12.8958 | PRPF8    | ENSG00000174231.17 | ENSP00000304350.6 | 84.6  | 7005 |
| NYLHLDYNF    | 9  | 0.0210  | PRPF8    | ENSG00000174231.17 | ENSP00000304350.6 | 84.6  | 7005 |
| RYIDRIHIF    | 10 | 0.0048  | PRPF8    | ENSG00000174231.17 | ENSP00000304350.6 | 84.6  | 7005 |
| VFQHYHAKF    | 9  | 0.0658  | SCAP     | ENSG00000114650.20 | ENSP00000497087.1 | 73.9  | 3837 |
| MQFRSILI     | 8  | 9.9824  | UPF1     | ENSG00000005007.12 | ENSP00000262803.4 | 68.5  | 3354 |
| RWSEVTRKLEF  | 11 | 0.1884  | KIF13B   | ENSG00000197892.13 | ENSP00000427900.1 | 38.7  | 5478 |

|              |    |         |         |                    |                   |       |      |
|--------------|----|---------|---------|--------------------|-------------------|-------|------|
| RYTIVQQQI    | 9  | 0.0257  | TUBGCP2 | ENSG00000130640.13 | ENSP00000252936.3 | 61.3  | 2706 |
| EYGQVNHAL    | 9  | 0.2286  | TUBGCP2 | ENSG00000130640.13 | ENSP00000252936.3 | 61.3  | 2706 |
| KFYTDPSYF    | 9  | 0.0750  | WASF2   | ENSG00000158195.11 | ENSP00000483313.1 | 36.0  | 1494 |
| RYQPQSGYW    | 9  | 0.0459  | TRIM6   | ENSG00000121236.21 | ENSP00000421079.1 | 124.8 | 939  |
| VFLDYEAGTVSF | 12 | 0.3169  | TRIM6   | ENSG00000121236.21 | ENSP00000421079.1 | 124.8 | 939  |
| LYLTNCEKL    | 9  | 0.2723  | ZER1    | ENSG00000160445.11 | ENSP00000291900.2 | 39.6  | 2298 |
| KFMPVSSLI    | 9  | 0.0906  | FTSJ3   | ENSG00000108592.17 | ENSP00000396673.2 | 60.1  | 2541 |
| RFIHNSHDLTY  | 11 | 1.5461  | TBC1D4  | ENSG00000136111.13 | ENSP00000366852.2 | 35.7  | 3705 |
| VYSETVDLIKF  | 11 | 0.0233  | AFF1    | ENSG00000172493.20 | ENSP00000378578.4 | 47.0  | 3654 |
| RYMEVSGNL    | 9  | 0.1194  | SF3A3   | ENSG00000183431.12 | ENSP00000362110.4 | 44.2  | 1503 |
| IYNPTTGEF    | 9  | 0.0082  | ATP1B3  | ENSG00000069849.11 | ENSP00000286371.3 | 40.4  | 837  |
| DVINPMALR    | 9  | 27.8000 | SART1   | ENSG00000175467.15 | ENSP00000310448.5 | 37.8  | 2400 |
| KYINTDAKF    | 9  | 0.0121  | TRPC4AP | ENSG00000100991.12 | ENSP00000252015.2 | 46.1  | 2391 |
| SYADQMFLI    | 9  | 0.0304  | TRPC4AP | ENSG00000100991.12 | ENSP00000252015.2 | 46.1  | 2391 |
| QYLRNPPKL    | 9  | 0.0404  | SHC1    | ENSG00000160691.18 | ENSP00000398864.1 | 67.9  | 387  |
| ETAPRTIFQR   | 10 | 23.9375 | ATXN10  | ENSG00000130638.17 | ENSP00000252934.4 | 48.6  | 1425 |
| VQRLEPVI     | 8  | 18.5526 | PFKFB3  | ENSG00000170525.21 | ENSP00000492001.1 | 60.4  | 1704 |
| HQNVPFNHI    | 9  | 2.8119  | ANKRD10 | ENSG00000088448.14 | ENSP00000267339.2 | 75.7  | 1260 |
| KQIEINTI     | 8  | 6.3780  | GSS     | ENSG00000100983.12 | ENSP00000494819.1 | 74.7  | 1080 |
| KYDPNVYSI    | 9  | 0.0092  | ITGAV   | ENSG00000138448.12 | ENSP00000261023.3 | 34.8  | 3144 |
| IYGAPGVEF    | 9  | 0.0076  | LLGL2   | ENSG00000073350.13 | ENSP00000464397.1 | 134.2 | 3057 |
| SVAHFGSRR    | 9  | 20.3704 | LLGL2   | ENSG00000073350.13 | ENSP00000464397.1 | 134.2 | 3057 |
| KFTPVASKF    | 9  | 0.0207  | ZYX     | ENSG00000159840.16 | ENSP00000376642.2 | 44.4  | 1245 |
| YIDRVRSI     | 8  | 2.5583  | KRT18   | ENSG00000111057.11 | ENSP00000373487.3 | 85.6  | 1290 |
| RYALQMEQL    | 9  | 0.0971  | KRT18   | ENSG00000111057.11 | ENSP00000373487.3 | 85.6  | 1290 |
| EYRPEFSNF    | 9  | 0.0662  | PARP4   | ENSG00000102699.6  | ENSP00000371419.3 | 34.5  | 5172 |
| QYPSICPRL    | 9  | 0.0573  | PARP4   | ENSG00000102699.6  | ENSP00000371419.3 | 34.5  | 5172 |

|             |    |         |         |                    |                   |       |      |
|-------------|----|---------|---------|--------------------|-------------------|-------|------|
| AYGTVHYF    | 8  | 0.0970  | LMF2    | ENSG00000100258.18 | ENSP00000216080.5 | 52.7  | 2046 |
| TYAEISQAF   | 9  | 0.0040  | SLC2A9  | ENSG00000109667.12 | ENSP00000264784.3 | 64.1  | 1620 |
| RYVQQLQRL   | 9  | 0.0226  | MRPL43  | ENSG00000055950.16 | ENSP00000299179.5 | 100.7 | 606  |
| GPREAGLR    | 8  | 80.0000 | CCDC115 | ENSG00000136710.10 | ENSP00000387301.1 | 45.1  | 525  |
| EVGPREAGLR  | 10 | 52.5000 | CCDC115 | ENSG00000136710.10 | ENSP00000387301.1 | 45.1  | 525  |
| RLPSSWALF   | 9  | 0.1195  | ITFG1   | ENSG00000129636.12 | ENSP00000319918.6 | 48.7  | 1836 |
| RYLTGAWRL   | 9  | 0.0240  | ALG5    | ENSG00000120697.9  | ENSP00000239891.3 | 38.8  | 972  |
| SYFDEPVEL   | 9  | 0.0327  | ARFGAP3 | ENSG00000242247.11 | ENSP00000263245.5 | 35.9  | 1548 |
| KFHSEVAKF   | 9  | 0.0743  | GGA2    | ENSG00000103365.15 | ENSP00000311962.4 | 42.6  | 1839 |
| HMYIFKTL    | 8  | 8.0939  | UGT8    | ENSG00000174607.11 | ENSP00000311648.6 | 37.6  | 1623 |
| DVVSFKFLNR  | 9  | 19.4839 | PPP1CB  | ENSG00000213639.10 | ENSP00000351298.2 | 42.8  | 981  |
| EVYDIAFSR   | 9  | 12.7500 | DCAF7   | ENSG00000136485.15 | ENSP00000483236.1 | 35.1  | 1026 |
| RYLPKPKAF   | 9  | 0.0169  | CRY2    | ENSG00000121671.11 | ENSP00000478187.1 | 37.3  | 1842 |
| GYSEHFVEF   | 9  | 0.0065  | GMPR    | ENSG00000137198.9  | ENSP00000259727.4 | 33.5  | 1035 |
| AVIHLALKER  | 10 | 46.0000 | SF3A1   | ENSG00000099995.19 | ENSP00000215793.7 | 66.1  | 2379 |
| EVVEDSLRQR  | 10 | 41.5000 | TMX4    | ENSG00000125827.9  | ENSP00000246024.2 | 33.4  | 1047 |
| KYPEIKSLM   | 9  | 0.0567  | DEGS1   | ENSG00000143753.13 | ENSP00000316476.4 | 38.5  | 969  |
| DTISPYSRM   | 9  | 6.3865  | DEGS1   | ENSG00000143753.13 | ENSP00000316476.4 | 38.5  | 969  |
| HFIAEHYMF   | 9  | 0.0437  | DEGS1   | ENSG00000143753.13 | ENSP00000316476.4 | 38.5  | 969  |
| KYIPKQSFL   | 9  | 0.0167  | EMC3    | ENSG00000125037.12 | ENSP00000245046.2 | 40.5  | 783  |
| AYANIISQF   | 9  | 0.0035  | SLC47A2 | ENSG00000180638.17 | ENSP00000326671.5 | 56.3  | 1806 |
| NYPETLGRLLI | 11 | 0.5073  | SEC14L1 | ENSG00000129657.16 | ENSP00000389838.1 | 62.0  | 2043 |
| EVIKNRFHR   | 9  | 19.6452 | USP19   | ENSG00000172046.19 | ENSP00000400090.1 | 49.8  | 4116 |
| TYARLAQLL   | 9  | 0.0278  | USP19   | ENSG00000172046.19 | ENSP00000400090.1 | 49.8  | 4116 |
| SYILRPVAF   | 9  | 0.0127  | SLC28A1 | ENSG00000156222.12 | ENSP00000286749.3 | 59.7  | 1947 |
| QYSDINNRW   | 9  | 0.0494  | SPTBN2  | ENSG00000173898.13 | ENSP00000433593.1 | 48.6  | 7095 |
| STIGETSNR   | 9  | 18.2368 | RBM23   | ENSG00000100461.18 | ENSP00000339220.5 | 45.9  | 1215 |

|             |    |         |          |                    |                   |       |      |
|-------------|----|---------|----------|--------------------|-------------------|-------|------|
| EQPETYKWK   | 9  | 0.2333  | INTS1    | ENSG00000164880.16 | ENSP00000385722.3 | 41.0  | 6570 |
| SVIDYQTHFR  | 10 | 13.6036 | TMED7    | ENSG00000134970.14 | ENSP00000405926.3 | 32.2  | 672  |
| KYIIELNHM   | 9  | 0.0526  | YPEL3    | ENSG00000090238.11 | ENSP00000381818.4 | 49.8  | 357  |
| KYLDNPNAL   | 9  | 0.0499  | KANK2    | ENSG00000197256.10 | ENSP00000465650.1 | 38.7  | 2553 |
| EVADPTAHR   | 9  | 11.2283 | KANK2    | ENSG00000197256.10 | ENSP00000465650.1 | 38.7  | 2553 |
| AYTTVLQEW   | 9  | 0.0210  | KANK2    | ENSG00000197256.10 | ENSP00000465650.1 | 38.7  | 2553 |
| EVADPTAHR   | 10 | 20.5926 | KANK2    | ENSG00000197256.10 | ENSP00000465650.1 | 38.7  | 2553 |
| VYRNKDALSHF | 11 | 0.1064  | TIMMDC1  | ENSG00000113845.9  | ENSP00000418803.1 | 42.3  | 855  |
| TQFLPRTI    | 8  | 6.9179  | PDZD11   | ENSG00000120509.10 | ENSP00000239666.4 | 48.0  | 420  |
| VMLEVLRV    | 8  | 15.3913 | ERMP1    | ENSG00000099219.14 | ENSP00000340427.5 | 38.3  | 2712 |
| EVFHSGHSR   | 9  | 17.8000 | FAM102A  | ENSG00000167106.12 | ENSP00000362187.1 | 34.3  | 1152 |
| SQRITNOV    | 8  | 27.2000 | PSMD7    | ENSG00000103035.11 | ENSP00000219313.4 | 74.6  | 972  |
| KYPASSSVF   | 9  | 0.0233  | HOXB7    | ENSG00000260027.4  | ENSP00000239165.7 | 34.6  | 651  |
| VYSEVHFTL   | 9  | 0.0025  | SYNPO    | ENSG00000171992.13 | ENSP00000302139.4 | 38.6  | 2709 |
| EVSGCGSLR   | 9  | 37.6667 | LRRC47   | ENSG00000130764.10 | ENSP00000367498.1 | 33.0  | 1749 |
| MVVGRLGR    | 10 | 41.5000 | HAGH     | ENSG00000063854.13 | ENSP00000380514.3 | 169.5 | 924  |
| EVIGRLDTM   | 9  | 6.7761  | ADH1B    | ENSG00000196616.14 | ENSP00000486614.1 | 39.1  | 1005 |
| KYSKIKHLL   | 9  | 0.0091  | SCNN1B   | ENSG00000168447.11 | ENSP00000345751.2 | 32.0  | 1920 |
| TQYKMTISM   | 9  | 3.7106  | SCNN1B   | ENSG00000168447.11 | ENSP00000345751.2 | 32.0  | 1920 |
| SYLSHSEQLVF | 11 | 0.0506  | TMEM106A | ENSG00000184988.8  | ENSP00000483246.1 | 34.0  | 786  |
| VYWKIYNSI   | 9  | 0.0655  | SF3B1    | ENSG00000115524.16 | ENSP00000335321.5 | 98.2  | 3912 |
| YYTREVMLI   | 9  | 0.0383  | SF3B1    | ENSG00000115524.16 | ENSP00000335321.5 | 98.2  | 3912 |
| GQRYFLNHI   | 9  | 9.7647  | WWTR1    | ENSG00000018408.14 | ENSP00000419465.1 | 46.6  | 1200 |
| TYLPAPEGLKF | 11 | 0.0056  | TNC      | ENSG00000041982.16 | ENSP00000442242.1 | 66.6  | 5514 |
| SYLDNFIKI   | 9  | 0.0093  | PAK4     | ENSG00000130669.17 | ENSP00000469413.1 | 45.3  | 1773 |
| EVTDYTTGR   | 9  | 21.5909 | ACSL4    | ENSG00000068366.19 | ENSP00000262835.7 | 34.4  | 2010 |
| VPYPLPKI    | 8  | 9.7088  | NPEPPS   | ENSG00000141279.16 | ENSP00000320324.4 | 52.0  | 2757 |

|              |    |         |         |                    |                   |       |       |
|--------------|----|---------|---------|--------------------|-------------------|-------|-------|
| NYADQISRL    | 9  | 0.1401  | SPAG9   | ENSG0000008294.21  | ENSP00000349636.4 | 55.7  | 3921  |
| VYSEAAARVLQF | 11 | 0.0210  | GALK2   | ENSG00000156958.15 | ENSP00000453133.1 | 37.9  | 1302  |
| RYLPDTLLL    | 9  | 0.0071  | COMT    | ENSG00000093010.13 | ENSP00000354511.6 | 59.6  | 813   |
| EIISEVQRM    | 9  | 8.8803  | ASAP2   | ENSG00000151693.11 | ENSP00000281419.3 | 31.9  | 3018  |
| QYTQALEKF    | 9  | 0.0092  | ASAP2   | ENSG00000151693.11 | ENSP00000281419.3 | 31.9  | 3018  |
| EYLLKVNEI    | 9  | 0.1535  | ASAP2   | ENSG00000151693.11 | ENSP00000281419.3 | 31.9  | 3018  |
| VYIDRVRSL    | 9  | 0.0290  | LMNA    | ENSG00000160789.20 | ENSP00000357282.3 | 81.9  | 1842  |
| AYIADHLGF    | 9  | 0.0522  | ANK2    | ENSG00000145362.18 | ENSP00000264366.6 | 106.3 | 11772 |
| PYMAKFVVF    | 9  | 0.0179  | ANK2    | ENSG00000145362.18 | ENSP00000264366.6 | 106.3 | 11772 |
| SYAEIEQTI    | 9  | 0.0119  | ANK2    | ENSG00000145362.18 | ENSP00000264366.6 | 106.3 | 11772 |
| SYADESFHF    | 9  | 0.0034  | ANK2    | ENSG00000145362.18 | ENSP00000264366.6 | 106.3 | 11772 |
| QLPDKWQHDL   | 10 | 2.4613  | ALYREF  | ENSG00000183684.7  | ENSP00000421592.2 | 32.5  | 792   |
| RYQQWMERF    | 9  | 0.0050  | ELAC2   | ENSG0000006744.19  | ENSP00000463740.2 | 47.5  | 1878  |
| IYIKHPLHF    | 9  | 0.0006  | DNTTIP1 | ENSG00000101457.13 | ENSP00000361705.3 | 34.5  | 987   |
| ETAGRYITY    | 9  | 8.2978  | POLR2E  | ENSG00000099817.12 | ENSP00000478303.1 | 77.7  | 630   |
| QGYTVARI     | 8  | 30.5000 | SEL1L   | ENSG00000071537.14 | ENSP00000337053.4 | 36.1  | 2382  |
| KQALKYFNL    | 9  | 1.2698  | SEL1L   | ENSG00000071537.14 | ENSP00000337053.4 | 36.1  | 2382  |
| QYAPSTAQF    | 9  | 0.0024  | ZMIZ2   | ENSG00000122515.15 | ENSP00000265346.7 | 54.0  | 2682  |
| AYHNSPAYL    | 9  | 0.1615  | SMARCE1 | ENSG00000073584.20 | ENSP00000464511.1 | 52.6  | 1023  |
| NYLVLPNRI    | 9  | 0.0900  | ESYT2   | ENSG00000117868.16 | ENSP00000499020.1 | 36.0  | 2679  |
| EVIGLKLGL    | 9  | 9.4126  | SYNE2   | ENSG00000054654.16 | ENSP00000450831.1 | 137.7 | 10623 |
| EVISGYEEL    | 9  | 5.1184  | CYFIP1  | ENSG00000273749.5  | ENSP00000478779.1 | 50.4  | 3759  |
| LYGKIAEAF    | 9  | 0.0168  | GIPC1   | ENSG00000123159.16 | ENSP00000376753.3 | 96.0  | 999   |
| VYLGHVIIYL   | 9  | 0.0162  | GJA4    | ENSG00000187513.9  | ENSP00000343676.4 | 33.0  | 999   |
| EQFKFKNMV    | 9  | 11.4239 | FAM192A | ENSG00000172775.17 | ENSP00000457850.1 | 56.9  | 762   |
| RYMQWRETI    | 9  | 0.0219  | ITPKB   | ENSG00000143772.9  | ENSP00000272117.3 | 31.4  | 2838  |
| DVTLGSVLGR   | 10 | 42.0000 | ACOX1   | ENSG00000161533.12 | ENSP00000293217.4 | 38.3  | 1980  |

|             |    |         |          |                    |                   |       |       |
|-------------|----|---------|----------|--------------------|-------------------|-------|-------|
| GQWEVKKI    | 8  | 18.6053 | SEC13    | ENSG00000157020.18 | ENSP00000312122.4 | 81.3  | 966   |
| YYMKDLPTSF  | 10 | 0.0052  | PI4KA    | ENSG00000241973.10 | ENSP00000255882.6 | 42.5  | 6306  |
| RFIRPMGLRF  | 10 | 0.1038  | NSA2     | ENSG00000164346.10 | ENSP00000483484.1 | 29.1  | 780   |
| LYLKEVTKF   | 9  | 0.0034  | RRAGD    | ENSG00000025039.14 | ENSP00000352131.2 | 38.7  | 747   |
| TYMKDLYQL   | 9  | 0.0083  | ARHGAP18 | ENSG00000146376.11 | ENSP00000357131.2 | 28.5  | 1989  |
| RYDPNIDQW   | 9  | 0.0269  | KLHL12   | ENSG00000117153.16 | ENSP00000356230.3 | 30.2  | 1704  |
| KYHGYPSYF   | 9  | 0.0019  | MAGT1    | ENSG00000102158.19 | ENSP00000478379.1 | 28.2  | 1101  |
| RYSSAFTNRIF | 12 | 0.1923  | MAGT1    | ENSG00000102158.19 | ENSP00000478379.1 | 28.2  | 1101  |
| HYAHLIKTF   | 9  | 0.0078  | DOCK1    | ENSG00000150760.12 | ENSP00000280333.6 | 34.2  | 5595  |
| MYIRYLYKL   | 9  | 0.0257  | DOCK1    | ENSG00000150760.12 | ENSP00000280333.6 | 34.2  | 5595  |
| QYADMLNKKF  | 10 | 0.0440  | DOCK1    | ENSG00000150760.12 | ENSP00000280333.6 | 34.2  | 5595  |
| KYMDINFDF   | 9  | 0.0063  | MYO1D    | ENSG00000176658.17 | ENSP00000324527.5 | 35.1  | 3018  |
| IYASVRTLL   | 9  | 0.0337  | SH3BP4   | ENSG00000130147.16 | ENSP00000340237.4 | 39.1  | 2889  |
| KYTKIFNDF   | 9  | 0.0077  | ZMYND11  | ENSG00000015171.19 | ENSP00000371017.5 | 55.4  | 1446  |
| IYQFIMDRF   | 9  | 0.0122  | FOXC1    | ENSG00000054598.9  | ENSP00000493906.1 | 27.7  | 1659  |
| EQYPPGMAR   | 9  | 15.0580 | FOXC1    | ENSG00000054598.9  | ENSP00000493906.1 | 27.7  | 1659  |
| KYAMMFAEL   | 9  | 0.1095  | HUWE1    | ENSG00000086758.16 | ENSP00000479451.1 | 50.5  | 13095 |
| DYILNVMKF   | 9  | 0.0438  | HUWE1    | ENSG00000086758.16 | ENSP00000479451.1 | 50.5  | 13095 |
| RYTDMESDYHF | 12 | 0.1578  | HUWE1    | ENSG00000086758.16 | ENSP00000479451.1 | 50.5  | 13095 |
| KYAHMINGF   | 9  | 0.0156  | ADSS     | ENSG00000035687.10 | ENSP00000355493.3 | 29.3  | 1368  |
| KYGPVFSF    | 8  | 0.0255  | CYP51A1  | ENSG00000001630.17 | ENSP00000003100.8 | 29.4  | 1527  |
| NYIKRNWRI   | 9  | 0.0872  | CSE1L    | ENSG00000124207.17 | ENSP00000262982.2 | 28.2  | 2913  |
| EYMEHVYLI   | 9  | 0.0119  | OSBPL2   | ENSG00000130703.16 | ENSP00000494549.1 | 38.6  | 1440  |
| YYEEQHPEL   | 9  | 0.1204  | IL32     | ENSG00000008517.16 | ENSP00000433866.3 | 125.7 | 663   |
| TFKELANEF   | 9  | 0.1342  | ERBB3    | ENSG00000065361.15 | ENSP00000448729.1 | 75.1  | 1386  |
| HQLPLPHNV   | 9  | 1.7648  | HIF1A    | ENSG00000100644.17 | ENSP00000338018.4 | 55.1  | 2478  |
| RYAEEVGIF   | 9  | 0.0345  | NANS     | ENSG00000095380.11 | ENSP00000210444.5 | 32.8  | 1077  |

|              |    |         |          |                    |                   |       |      |
|--------------|----|---------|----------|--------------------|-------------------|-------|------|
| LYGNIIDNL    | 9  | 0.1878  | IDH3B    | ENSG00000101365.21 | ENSP00000482773.1 | 116.5 | 1161 |
| YYPSTPGRYSI  | 11 | 0.1783  | FLNB     | ENSG00000136068.14 | ENSP00000295956.4 | 154.1 | 7806 |
| VFVNTHHIL    | 9  | 0.2321  | B3GNT2   | ENSG00000170340.11 | ENSP00000305595.4 | 26.6  | 1191 |
| RYAQNVAFF    | 9  | 0.0039  | ZNF32    | ENSG00000169740.14 | ENSP00000363556.2 | 48.2  | 819  |
| EMISDEIHER   | 10 | 24.2857 | SH3BP5   | ENSG00000131370.16 | ENSP00000373301.3 | 45.2  | 1365 |
| ELVHKETAAR   | 10 | 49.0000 | SH3BP5   | ENSG00000131370.16 | ENSP00000373301.3 | 45.2  | 1365 |
| KYPNVFKKI    | 9  | 0.0209  | AHCYL1   | ENSG00000168710.18 | ENSP00000377238.4 | 84.5  | 1449 |
| RYKQDVYLL    | 9  | 0.0154  | AHCYL1   | ENSG00000168710.18 | ENSP00000377238.4 | 84.5  | 1449 |
| HYLDTTTLI    | 9  | 0.0353  | CRKL     | ENSG00000099942.13 | ENSP00000346300.3 | 26.2  | 909  |
| VMSQALKATF   | 10 | 1.4321  | ETS2     | ENSG00000157557.13 | ENSP00000499540.1 | 50.3  | 1512 |
| EYGPVYSTW    | 9  | 0.0089  | SNX30    | ENSG00000148158.17 | ENSP00000363349.3 | 27.0  | 1311 |
| VYLPNINKI    | 9  | 0.0031  | RHOBTB1  | ENSG00000072422.17 | ENSP00000338671.5 | 35.4  | 2088 |
| LYPDHFHLL    | 9  | 0.0048  | PPP5C    | ENSG00000011485.14 | ENSP00000012443.4 | 41.8  | 1497 |
| TEPLPEKTQESL | 12 | 19.4839 | TPD52    | ENSG00000076554.15 | ENSP00000368391.3 | 63.0  | 672  |
| ETRAEFAER    | 9  | 35.7500 | TPM2     | ENSG00000198467.15 | ENSP00000367542.3 | 107.2 | 852  |
| IYGLLKNPF    | 9  | 0.1190  | YME1L1   | ENSG00000136758.18 | ENSP00000318480.3 | 47.3  | 2319 |
| GQTRLLVV     | 8  | 42.0000 | SLC9A3R2 | ENSG00000065054.14 | ENSP00000402857.2 | 158.8 | 978  |
| ELIQEITQR    | 9  | 20.1111 | RDX      | ENSG00000137710.16 | ENSP00000496414.1 | 57.2  | 1812 |
| VYVQNVVKL    | 9  | 0.0130  | AP3D1    | ENSG00000065000.18 | ENSP00000495274.1 | 85.7  | 3645 |
| EYLTKVDKL    | 9  | 0.1835  | CLTC     | ENSG00000141367.11 | ENSP00000479606.1 | 86.3  | 5037 |
| IYIDSNNPERF  | 12 | 0.0352  | CLTC     | ENSG00000141367.11 | ENSP00000479606.1 | 86.3  | 5037 |
| LYDPVISKL    | 9  | 0.0417  | MCRS1    | ENSG00000187778.14 | ENSP00000349640.4 | 57.9  | 1425 |
| SVVEIASLR    | 9  | 17.9333 | MCRS1    | ENSG00000187778.14 | ENSP00000349640.4 | 57.9  | 1425 |
| KYGKDFNDI    | 9  | 0.4760  | MTA2     | ENSG00000149480.7  | ENSP00000278823.2 | 31.6  | 2004 |
| SYLPSPEKL    | 9  | 0.0061  | PLCL1    | ENSG00000115896.16 | ENSP00000402861.1 | 27.5  | 3285 |
| KYPVLEVERI   | 9  | 0.0235  | ARHGEF28 | ENSG00000214944.9  | ENSP00000296799.4 | 36.4  | 4176 |
| IYLSKPTHW    | 9  | 0.0061  | POLR2B   | ENSG00000047315.16 | ENSP00000491706.1 | 45.0  | 3297 |

|             |    |         |           |                    |                   |       |       |
|-------------|----|---------|-----------|--------------------|-------------------|-------|-------|
| VYAILTHGI   | 9  | 0.0592  | PRPS2     | ENSG00000101911.12 | ENSP00000370043.5 | 32.3  | 954   |
| TYIESASEL   | 9  | 0.0940  | GALNT14   | ENSG00000158089.15 | ENSP00000288988.6 | 86.3  | 1656  |
| RYKAPFHQL   | 9  | 0.0113  | SMARCA1   | ENSG00000102038.15 | ENSP00000360162.4 | 26.9  | 3210  |
| RQVKLVNI    | 8  | 10.5725 | PLEC      | ENSG00000178209.15 | ENSP00000434583.1 | 45.3  | 13710 |
| IYLEKTKTI   | 9  | 0.0161  | PLEC      | ENSG00000178209.15 | ENSP00000434583.1 | 45.3  | 13710 |
| YVIDPIKGL   | 9  | 3.7410  | PLEC      | ENSG00000178209.15 | ENSP00000434583.1 | 45.3  | 13710 |
| VYAALQRQLL  | 10 | 0.2393  | PLEC      | ENSG00000178209.15 | ENSP00000434583.1 | 45.3  | 13710 |
| SQRPIQMV    | 8  | 18.9211 | EHD3      | ENSG00000013016.16 | ENSP00000327116.5 | 25.1  | 1605  |
| AYVEMLQHL   | 9  | 0.0160  | FGD5      | ENSG00000154783.11 | ENSP00000285046.5 | 26.6  | 4386  |
| RMITAMNTI   | 9  | 2.1085  | KEAP1     | ENSG00000079999.14 | ENSP00000377245.1 | 36.8  | 1872  |
| QQQTMLRV    | 8  | 28.6250 | PACS1     | ENSG00000175115.12 | ENSP00000316454.4 | 29.9  | 2889  |
| KYRDQYNWF   | 9  | 0.0904  | C1GALT1C1 | ENSG00000171155.8  | ENSP00000304364.5 | 25.1  | 954   |
| VYLPTHTSL   | 9  | 0.0083  | MYLIP     | ENSG00000007944.15 | ENSP00000349298.3 | 28.5  | 1335  |
| TYQVLAVTF   | 9  | 0.0055  | SNRNP40   | ENSG00000060688.13 | ENSP00000263694.4 | 28.3  | 1071  |
| KYGMVTYLL   | 9  | 0.0229  | GPAT4     | ENSG00000158669.11 | ENSP00000380184.3 | 62.4  | 1368  |
| KYGTKIEHF   | 9  | 0.0054  | SCP2      | ENSG00000116171.18 | ENSP00000435194.1 | 142.7 | 1098  |
| RYVVTSVSW   | 9  | 0.0274  | EIF3B     | ENSG00000106263.18 | ENSP00000354125.4 | 102.4 | 2442  |
| PEKLATKF    | 8  | 19.0000 | ECPAS     | ENSG00000136813.14 | ENSP00000339889.5 | 37.2  | 5517  |
| VYPEKLATKF  | 10 | 0.0074  | ECPAS     | ENSG00000136813.14 | ENSP00000339889.5 | 37.2  | 5517  |
| KYISKPENL   | 9  | 0.0178  | CAB39     | ENSG00000135932.11 | ENSP00000258418.5 | 27.2  | 1023  |
| KYISKPENLKL | 11 | 0.1414  | CAB39     | ENSG00000135932.11 | ENSP00000258418.5 | 27.2  | 1023  |
| VYADQPHIF   | 9  | 0.0016  | ABHD4     | ENSG00000100439.10 | ENSP00000414558.2 | 27.0  | 1026  |
| KYIHSANVL   | 9  | 0.0925  | MAPK1     | ENSG00000100030.14 | ENSP00000215832.6 | 25.6  | 1080  |
| ELKQLAAAR   | 9  | 38.3333 | SPTAN1    | ENSG00000197694.15 | ENSP00000487444.1 | 86.7  | 7494  |
| TQPGTGWVQF  | 10 | 0.6774  | NECAP2    | ENSG00000157191.20 | ENSP00000338746.5 | 36.3  | 789   |
| EVIEKFDYV   | 9  | 9.2330  | PMM1      | ENSG00000100417.12 | ENSP00000216259.7 | 111.6 | 786   |
| IQHLLPKI    | 8  | 9.3447  | PSME2     | ENSG00000100911.16 | ENSP00000216802.5 | 70.2  | 717   |

|              |    |         |         |                    |                   |        |      |
|--------------|----|---------|---------|--------------------|-------------------|--------|------|
| VYGSFASKL    | 9  | 0.0827  | AZIN1   | ENSG00000155096.14 | ENSP00000337180.5 | 31.7   | 1344 |
| VYLIEHPSL    | 9  | 0.0372  | ASPA    | ENSG00000108381.11 | ENSP00000263080.2 | 25.0   | 939  |
| RYMPFAPAIQTF | 12 | 0.0060  | UBA7    | ENSG00000182179.13 | ENSP00000333266.3 | 59.8   | 3036 |
| RYSRKGFLF    | 9  | 0.0090  | SUPT5H  | ENSG00000196235.14 | ENSP00000384505.2 | 85.9   | 3249 |
| EVTEEGVRFRR  | 10 | 37.0000 | QTRT1   | ENSG00000213339.9  | ENSP00000250237.4 | 42.7   | 1209 |
| SYIAHLRQL    | 9  | 0.0534  | TCF21   | ENSG00000118526.6  | ENSP00000356857.4 | 41.9   | 537  |
| DVRDRMIHR    | 9  | 26.4000 | ABLIM1  | ENSG00000099204.20 | ENSP00000376682.4 | 56.9   | 2154 |
| AVVGPDMKRR   | 10 | 40.5000 | ABLIM1  | ENSG00000099204.20 | ENSP00000376682.4 | 56.9   | 2154 |
| RYVVIPTTF    | 9  | 0.0029  | CAPN5   | ENSG00000149260.18 | ENSP00000498132.1 | 28.4   | 1920 |
| QYQKILERL    | 9  | 0.0217  | TAB1    | ENSG00000100324.14 | ENSP00000216160.6 | 25.4   | 1512 |
| KYGVHEAIF    | 9  | 0.0971  | PPARD   | ENSG00000112033.14 | ENSP00000310928.4 | 26.6   | 1323 |
| NYAPAFTML    | 9  | 0.0303  | TTC37   | ENSG00000198677.11 | ENSP00000351596.2 | 28.3   | 4692 |
| RYPSLWRRLL   | 9  | 0.0443  | SMARCB1 | ENSG00000099956.19 | ENSP00000383984.3 | 37.4   | 1128 |
| YYDPKHVIF    | 9  | 0.0039  | ABCF3   | ENSG00000161204.11 | ENSP00000411471.2 | 58.9   | 2127 |
| RYFHWKMNL    | 9  | 0.0632  | GPR89A  | ENSG00000117262.19 | ENSP00000432248.1 | 38.8   | 1290 |
| RYDEIRRHW    | 9  | 0.0370  | RPL7A   | ENSG00000148303.17 | ENSP00000361071.1 | 1509.0 | 453  |
| NYNDRYDEI    | 9  | 0.3807  | RPL7A   | ENSG00000148303.17 | ENSP00000361071.1 | 1509.0 | 453  |
| SFLKAKVI     | 8  | 4.5604  | RBM42   | ENSG00000126254.12 | ENSP00000262633.3 | 57.3   | 1440 |
| VYITRAQLM    | 9  | 0.0807  | NACC1   | ENSG00000160877.6  | ENSP00000292431.3 | 27.9   | 1581 |
| KYVDKLEKI    | 9  | 0.0196  | USP5    | ENSG00000111667.13 | ENSP00000373883.5 | 44.8   | 2505 |
| RYPPDIRATF   | 10 | 0.0042  | SBF1    | ENSG00000100241.21 | ENSP00000370196.2 | 33.1   | 5679 |
| STGISYETL    | 9  | 3.8540  | ATXN7L3 | ENSG00000087152.15 | ENSP00000467092.1 | 35.8   | 558  |
| SYTPVLNQF    | 9  | 0.0012  | UNC13B  | ENSG00000198722.14 | ENSP00000367756.3 | 35.9   | 4773 |
| LYQHEINLF    | 9  | 0.0061  | CEBPZ   | ENSG00000115816.15 | ENSP00000234170.5 | 23.7   | 3162 |
| TYISKTIAL    | 9  | 0.0533  | EXOC3L2 | ENSG00000283632.2  | ENSP00000400713.2 | 23.3   | 2406 |
| EYPRETFSF    | 9  | 0.0083  | DENND2D | ENSG00000162777.17 | ENSP00000358767.5 | 31.1   | 1404 |
| EQYYVRKV     | 8  | 22.1053 | BICD2   | ENSG00000185963.14 | ENSP00000364662.3 | 24.5   | 2472 |

|            |    |         |          |                    |                   |       |      |
|------------|----|---------|----------|--------------------|-------------------|-------|------|
| HYMSINDSF  | 9  | 0.0118  | BICD2    | ENSG00000185963.14 | ENSP00000364662.3 | 24.5  | 2472 |
| QYLPHVARL  | 9  | 0.0178  | SURF4    | ENSG00000148248.14 | ENSP00000361057.3 | 119.2 | 807  |
| VYPYKLYRL  | 9  | 0.0213  | ZBTB38   | ENSG00000177311.11 | ENSP00000372635.5 | 37.0  | 3585 |
| KYPNV DARL | 9  | 0.1058  | UGCG     | ENSG00000148154.10 | ENSP00000363397.3 | 23.8  | 1182 |
| RWMSQHNR F | 9  | 0.0504  | PAFAH1B2 | ENSG00000168092.14 | ENSP00000435289.1 | 24.4  | 687  |
| YSAPATLSSR | 10 | 24.7143 | PDLIM2   | ENSG00000120913.23 | ENSP00000477546.1 | 105.5 | 438  |
| YYLTHGLYL  | 9  | 0.0587  | PIGU     | ENSG00000101464.10 | ENSP00000217446.3 | 24.2  | 1305 |
| GQLKSLTI   | 8  | 15.6087 | DNAJB6   | ENSG00000105993.15 | ENSP00000397556.2 | 57.8  | 723  |
| KYCYLQNEVF | 10 | 0.1894  | DSP      | ENSG00000096696.14 | ENSP00000369129.3 | 29.4  | 8613 |
| SYSGTFHSL  | 9  | 0.0117  | NBPF1    | ENSG00000219481.10 | ENSP00000474456.1 | 41.8  | 3417 |
| VFTPVVQRI  | 9  | 0.0740  | CMIP     | ENSG00000153815.16 | ENSP00000446100.2 | 30.1  | 2319 |
| QYRIDFEQF  | 9  | 0.0666  | TBC1D9   | ENSG00000109436.8  | ENSP00000411197.2 | 22.8  | 3798 |
| VYLHLRQTW  | 9  | 0.0164  | SLC44A2  | ENSG00000129353.15 | ENSP00000466664.1 | 124.8 | 2133 |
| AYLDALQTL  | 9  | 0.0105  | KANSL3   | ENSG00000114982.19 | ENSP00000499674.1 | 29.8  | 2712 |
| PYNPLWAQL  | 9  | 0.0583  | FNIP2    | ENSG00000052795.13 | ENSP00000264433.6 | 38.3  | 3342 |
| AQAEALRI   | 8  | 19.1613 | CBX6     | ENSG00000183741.11 | ENSP00000384490.3 | 24.1  | 1236 |
| RYNPRILFQL | 10 | 0.0938  | WASHC5   | ENSG00000164961.16 | ENSP00000429676.1 | 30.9  | 3033 |
| RYTDVSTRY  | 9  | 0.3363  | TMX2     | ENSG00000213593.10 | ENSP00000278422.4 | 91.8  | 888  |
| KYVDPICTF  | 9  | 0.0059  | SLC30A2  | ENSG00000158014.14 | ENSP00000363394.3 | 31.7  | 1116 |
| RYTAILNQI  | 9  | 0.0441  | COL14A1  | ENSG00000187955.12 | ENSP00000311809.4 | 37.9  | 5340 |
| EVIEAVRNL  | 9  | 5.3436  | COL14A1  | ENSG00000187955.12 | ENSP00000311809.4 | 37.9  | 5340 |
| GQFKIGLI   | 8  | 21.0000 | VPS29    | ENSG00000111237.18 | ENSP00000353786.7 | 69.3  | 558  |
| EYLDRAEKL  | 9  | 0.2097  | VPS4B    | ENSG00000119541.10 | ENSP00000238497.4 | 26.6  | 1332 |
| LYQHAVQYF  | 9  | 0.0039  | VPS4B    | ENSG00000119541.10 | ENSP00000238497.4 | 26.6  | 1332 |
| EVIKNFIQY  | 9  | 5.4624  | EIF3L    | ENSG00000100129.18 | ENSP00000499067.1 | 246.8 | 1692 |
| KYGPVVSLL  | 9  | 0.0049  | UHMK1    | ENSG00000152332.16 | ENSP00000420270.1 | 22.5  | 1257 |
| RYGDV FQI  | 8  | 0.3817  | CYP1B1   | ENSG00000138061.12 | ENSP00000478561.1 | 37.2  | 1629 |

|              |    |         |         |                    |                   |      |       |
|--------------|----|---------|---------|--------------------|-------------------|------|-------|
| KYREMYEEF    | 9  | 0.0122  | MTREX   | ENSG00000039123.16 | ENSP00000230640.5 | 27.8 | 3126  |
| EYMLEKSFYQF  | 11 | 0.1285  | MTREX   | ENSG00000039123.16 | ENSP00000230640.5 | 27.8 | 3126  |
| EQLSILKV     | 8  | 22.4211 | MYH11   | ENSG00000133392.18 | ENSP00000498314.1 | 70.5 | 1905  |
| VYVVGTAHF    | 9  | 0.0062  | TRABD   | ENSG00000170638.9  | ENSP00000379171.1 | 30.1 | 1128  |
| RQALMPTL     | 8  | 7.1087  | EP300   | ENSG00000100393.13 | ENSP00000263253.7 | 23.8 | 7242  |
| SYLDSVHFF    | 9  | 0.0010  | EP300   | ENSG00000100393.13 | ENSP00000263253.7 | 23.8 | 7242  |
| VYLHDFQRF    | 9  | 0.0021  | PLCG2   | ENSG00000197943.10 | ENSP00000482457.1 | 33.0 | 3795  |
| KYMQMNHAF    | 10 | 0.0136  | PLCG2   | ENSG00000197943.10 | ENSP00000482457.1 | 33.0 | 3795  |
| IYDPNLAFRLF  | 11 | 0.0338  | PLCG2   | ENSG00000197943.10 | ENSP00000482457.1 | 33.0 | 3795  |
| KYSLVKNKI    | 9  | 0.0825  | S100A16 | ENSG00000188643.11 | ENSP00000357692.1 | 53.3 | 309   |
| YYIRGATTF    | 10 | 0.0094  | DPT     | ENSG00000143196.5  | ENSP00000356791.3 | 21.6 | 603   |
| RYGIHPAKF    | 9  | 0.0094  | VWA8    | ENSG00000102763.18 | ENSP00000368612.3 | 22.5 | 5715  |
| GYPSTRASFHEL | 11 | 0.4562  | MYO6    | ENSG00000196586.15 | ENSP00000358992.1 | 37.7 | 3759  |
| RYEPANSHFF   | 10 | 0.0169  | WDFY3   | ENSG00000163625.15 | ENSP00000295888.4 | 34.3 | 10578 |
| RYSVASFKE    | 9  | 0.0048  | MYORG   | ENSG00000164976.9  | ENSP00000297625.8 | 21.5 | 2142  |
| IQTALQV      | 8  | 20.0000 | AP2A1   | ENSG00000196961.12 | ENSP00000346246.4 | 46.0 | 2865  |
| EYIPDLYNHF   | 10 | 0.0109  | RABGAP1 | ENSG00000011454.17 | ENSP00000362751.4 | 28.2 | 3207  |
| TYLPDHMTL    | 9  | 0.0055  | AQP7    | ENSG00000165269.13 | ENSP00000297988.1 | 52.9 | 1026  |
| KYDEIFYNL    | 9  | 0.0149  | EHD2    | ENSG00000024422.12 | ENSP00000263277.2 | 22.7 | 1629  |
| KYFAKHPR     | 9  | 0.0541  | UTRN    | ENSG00000152818.18 | ENSP00000356515.3 | 32.3 | 10299 |
| EIFDGNVAHI   | 10 | 7.8626  | UTRN    | ENSG00000152818.18 | ENSP00000356515.3 | 32.3 | 10299 |
| KYQELQVLF    | 9  | 0.0015  | VPS37B  | ENSG00000139722.7  | ENSP00000267202.2 | 21.9 | 855   |
| RYLRVEHHF    | 9  | 0.0028  | ACACB   | ENSG00000076555.15 | ENSP00000367079.3 | 38.8 | 7374  |
| RYFQPPGTW    | 9  | 0.0260  | NMD3    | ENSG00000169251.12 | ENSP00000419004.1 | 25.7 | 1509  |
| KYGRIVEVL    | 9  | 0.0696  | RBMX    | ENSG00000147274.14 | ENSP00000405117.2 | 69.2 | 876   |
| HGMIMLRI     | 8  | 23.6875 | ARCN1   | ENSG00000095139.14 | ENSP00000264028.4 | 31.3 | 1533  |
| QQSVLQRI     | 8  | 15.8406 | SMC1A   | ENSG00000072501.17 | ENSP00000476416.1 | 40.7 | 837   |

|              |    |         |          |                    |                   |      |       |
|--------------|----|---------|----------|--------------------|-------------------|------|-------|
| EYIDSPVIL    | 9  | 0.1151  | PKHD1    | ENSG00000170927.14 | ENSP00000360158.3 | 20.6 | 12222 |
| DYTGALAVF    | 9  | 0.1970  | F8A1     | ENSG00000277203.1  | ENSP00000479624.1 | 20.4 | 1113  |
| KYSEVF EAI   | 9  | 0.0179  | CSNK2A1  | ENSG00000101266.19 | ENSP00000494445.1 | 32.4 | 264   |
| FFKPHWDEKF   | 10 | 0.2620  | SERPINH1 | ENSG00000149257.14 | ENSP00000434412.1 | 29.4 | 1254  |
| AYVVKV FSL   | 9  | 0.0716  | C3       | ENSG00000125730.16 | ENSP00000245907.4 | 22.8 | 4989  |
| HWESASLLR    | 9  | 8.6555  | C3       | ENSG00000125730.16 | ENSP00000245907.4 | 22.8 | 4989  |
| RIHWESASLLR  | 11 | 18.0263 | C3       | ENSG00000125730.16 | ENSP00000245907.4 | 22.8 | 4989  |
| HRIHWESASLLR | 12 | 27.6000 | C3       | ENSG00000125730.16 | ENSP00000245907.4 | 22.8 | 4989  |
| LYIDEAHSI    | 9  | 0.0215  | SPTLC2   | ENSG00000100596.6  | ENSP00000216484.2 | 20.9 | 1686  |
| LYMRIRDNW    | 9  | 0.0883  | SPTLC2   | ENSG00000100596.6  | ENSP00000216484.2 | 20.9 | 1686  |
| RYLTRGYSL    | 9  | 0.0444  | FLT1     | ENSG00000102755.12 | ENSP00000282397.4 | 29.4 | 4014  |
| KYG NLSNYL   | 9  | 0.1072  | FLT1     | ENSG00000102755.12 | ENSP00000282397.4 | 29.4 | 4014  |
| AYAQEIQKL    | 9  | 0.0248  | NFIL3    | ENSG00000165030.4  | ENSP00000297689.2 | 20.2 | 1386  |
| RYYGNISRF    | 9  | 0.0041  | EHMT2    | ENSG00000204371.11 | ENSP00000364687.4 | 33.1 | 3630  |
| RYLDELMKL    | 9  | 0.0132  | IQGAP1   | ENSG00000140575.13 | ENSP00000488618.1 | 49.4 | 3573  |
| KYGIQMPAF    | 9  | 0.0474  | IQGAP1   | ENSG00000140575.13 | ENSP00000488618.1 | 49.4 | 3573  |
| RYRDRLQYF    | 9  | 0.0357  | IQGAP1   | ENSG00000140575.13 | ENSP00000488618.1 | 49.4 | 3573  |
| YFHPPAHL     | 8  | 0.8542  | MBNL1    | ENSG00000152601.17 | ENSP00000418427.1 | 34.7 | 906   |
| KYFHPPAHL    | 9  | 0.0180  | MBNL1    | ENSG00000152601.17 | ENSP00000418427.1 | 34.7 | 906   |
| KYLHPPPHL    | 9  | 0.0152  | MBNL1    | ENSG00000152601.17 | ENSP00000418427.1 | 34.7 | 906   |
| QYSRFSLENNF  | 11 | 0.2339  | STAT1    | ENSG00000115415.18 | ENSP00000438703.1 | 45.4 | 579   |
| EYAVLTSTI    | 9  | 0.1604  | IRF2     | ENSG00000168310.11 | ENSP00000377218.3 | 21.4 | 1047  |
| RYITKGNLF    | 9  | 0.0081  | PPP4R3B  | ENSG00000275052.5  | ENSP00000484116.1 | 34.0 | 2451  |
| NQYRLIVNV    | 9  | 8.1306  | MCM3     | ENSG00000112118.19 | ENSP00000472940.2 | 28.5 | 2424  |
| EVTGFGVTR    | 9  | 23.1250 | KLC4     | ENSG00000137171.15 | ENSP00000418546.1 | 79.1 | 135   |
| IYGYVAEQF    | 9  | 0.0035  | SPCS1    | ENSG00000114902.14 | ENSP00000478310.2 | 66.0 | 306   |
| ETILRTNKR    | 9  | 28.3750 | SH3KBP1  | ENSG00000147010.18 | ENSP00000369020.4 | 24.1 | 1884  |

|            |    |         |         |                    |                   |       |       |
|------------|----|---------|---------|--------------------|-------------------|-------|-------|
| FVIDAVRTK  | 9  | 21.2273 | EIF3M   | ENSG00000149100.13 | ENSP00000436049.1 | 34.8  | 1122  |
| ETYYKMLAR  | 9  | 17.3111 | RCN3    | ENSG00000142552.8  | ENSP00000270645.2 | 24.5  | 984   |
| SVVGFLSQR  | 9  | 13.2613 | DCAF5   | ENSG00000139990.17 | ENSP00000451845.1 | 35.7  | 2823  |
| SYVQVTSNF  | 9  | 0.0048  | AFF4    | ENSG00000072364.13 | ENSP00000265343.5 | 21.8  | 3489  |
| HYLQEAKKL  | 9  | 0.2118  | AFF4    | ENSG00000072364.13 | ENSP00000265343.5 | 21.8  | 3489  |
| KYVESFRRF  | 9  | 0.0054  | HNMT    | ENSG00000150540.14 | ENSP00000280097.3 | 81.7  | 876   |
| KYMSVIAEL  | 9  | 0.0139  | ATPAF1  | ENSG00000123472.12 | ENSP00000460964.1 | 34.6  | 1053  |
| VYAVIPAЕКF | 10 | 0.0179  | ATPAF1  | ENSG00000123472.12 | ENSP00000460964.1 | 34.6  | 1053  |
| WQAKVPQI   | 8  | 6.7285  | DYNC1H1 | ENSG00000197102.12 | ENSP00000348965.4 | 69.6  | 13938 |
| TQRVISFI   | 8  | 22.2105 | DYNC1H1 | ENSG00000197102.12 | ENSP00000348965.4 | 69.6  | 13938 |
| RYKLYQEMF  | 9  | 0.0326  | DYNC1H1 | ENSG00000197102.12 | ENSP00000348965.4 | 69.6  | 13938 |
| ETFDQAMGR  | 10 | 23.7500 | DYNC1H1 | ENSG00000197102.12 | ENSP00000348965.4 | 69.6  | 13938 |
| LYTEKFEEF  | 9  | 0.0048  | TXLNA   | ENSG00000084652.16 | ENSP00000362712.3 | 24.5  | 1638  |
| EAIQRTEAY  | 9  | 12.6667 | SEC16A  | ENSG00000148396.18 | ENSP00000403525.1 | 31.5  | 3177  |
| KYLDYMQKI  | 9  | 0.0092  | LACTB   | ENSG00000103642.12 | ENSP00000261893.4 | 24.7  | 1641  |
| VYMNVMTRL  | 9  | 0.0185  | PPP2R3A | ENSG00000073711.11 | ENSP00000264977.3 | 20.2  | 3450  |
| SYMWTINNF  | 9  | 0.0050  | SPOP    | ENSG00000121067.19 | ENSP00000499367.1 | 30.9  | 495   |
| TYQSITERI  | 9  | 0.0213  | EXOC4   | ENSG00000131558.15 | ENSP00000253861.4 | 26.9  | 2922  |
| SYSMIVNNL  | 9  | 0.0581  | CACYBP  | ENSG00000116161.17 | ENSP00000356652.2 | 28.6  | 684   |
| AYPHRLNLF  | 9  | 0.0134  | RPRD2   | ENSG00000163125.15 | ENSP00000358064.4 | 23.6  | 4383  |
| KYLTEGLLOF | 10 | 0.0110  | NFE2L1  | ENSG00000082641.16 | ENSP00000355190.3 | 119.3 | 2283  |
| KQVQQPSV   | 8  | 21.2273 | WTAP    | ENSG00000146457.16 | ENSP00000336911.4 | 34.0  | 453   |
| VYIKHLRDI  | 9  | 0.1886  | SPATA13 | ENSG00000182957.16 | ENSP00000371527.4 | 26.1  | 1956  |
| KYRRYHPLF  | 9  | 0.1047  | ARAP1   | ENSG00000186635.14 | ENSP00000335506.8 | 60.2  | 3615  |
| NYLSHHLTI  | 9  | 0.0216  | PAIP1   | ENSG00000172239.14 | ENSP00000425675.1 | 48.5  | 600   |
| SFSPKTYSF  | 9  | 0.0057  | PIK3C2A | ENSG00000011405.13 | ENSP00000265970.6 | 21.9  | 5058  |
| SYEYRFLEF  | 9  | 0.0483  | RFTN1   | ENSG00000131378.14 | ENSP00000334153.4 | 20.0  | 1734  |

|             |    |         |          |                    |                   |       |      |
|-------------|----|---------|----------|--------------------|-------------------|-------|------|
| YYQNYFEKL   | 9  | 0.0119  | PATL1    | ENSG00000166889.14 | ENSP00000300146.9 | 19.7  | 2310 |
| EVNPNTVRM   | 9  | 7.9958  | ORMDL3   | ENSG00000172057.10 | ENSP00000304858.2 | 25.0  | 459  |
| YYEYNHDLF   | 9  | 0.0995  | SAV1     | ENSG00000151748.14 | ENSP00000324729.4 | 23.1  | 1149 |
| VFYAVKVL    | 8  | 3.5233  | SGK1     | ENSG00000118515.11 | ENSP00000396242.3 | 44.8  | 1335 |
| SYAPPTDSF   | 9  | 0.0041  | SGK1     | ENSG00000118515.11 | ENSP00000396242.3 | 44.8  | 1335 |
| KYLTAFAFGF  | 10 | 0.1492  | FSCN1    | ENSG00000075618.18 | ENSP00000371798.3 | 23.9  | 1479 |
| MQQILTRV    | 8  | 18.4737 | GNL2     | ENSG00000134697.13 | ENSP00000362153.3 | 22.2  | 2193 |
| EYISKTYKI   | 9  | 0.0142  | GNL2     | ENSG00000134697.13 | ENSP00000362153.3 | 22.2  | 2193 |
| EVGPKFRGV   | 9  | 16.8545 | AAR2     | ENSG00000131043.12 | ENSP00000363043.3 | 25.5  | 1152 |
| EVIDLMIKEY  | 10 | 25.6667 | PHF10    | ENSG00000130024.15 | ENSP00000355743.4 | 27.8  | 1488 |
| RYIRDAHTF   | 9  | 0.0026  | ARHGAP35 | ENSG00000160007.18 | ENSP00000385720.2 | 19.5  | 4497 |
| VYGKEGLVHSF | 11 | 0.0370  | RHCG     | ENSG00000140519.14 | ENSP00000453496.1 | 109.7 | 711  |
| EVINRSMDTY  | 10 | 26.1000 | CAMLG    | ENSG00000164615.5  | ENSP00000297156.2 | 26.6  | 888  |
| KQLSILKV    | 8  | 14.7556 | SCRIB    | ENSG00000180900.19 | ENSP00000366756.3 | 32.4  | 4647 |
| SYMLVNENRF  | 10 | 0.0500  | LDOC1    | ENSG00000182195.8  | ENSP00000359557.2 | 24.0  | 438  |
| HYNSDLNLLF  | 11 | 0.1085  | RHOBTB3  | ENSG00000164292.13 | ENSP00000369318.3 | 22.6  | 1833 |
| VYSSAEFHSL  | 10 | 0.1182  | LTBP3    | ENSG00000168056.16 | ENSP00000435530.1 | 115.7 | 2199 |
| QYSDVNNRW   | 9  | 0.0627  | SPTBN1   | ENSG00000115306.16 | ENSP00000349259.4 | 224.4 | 7092 |
| YYLGNPAEF   | 9  | 0.0034  | RCN1     | ENSG00000049449.9  | ENSP00000054950.3 | 33.3  | 993  |
| YIKQIKTF    | 8  | 0.4863  | RBL2     | ENSG00000103479.16 | ENSP00000262133.6 | 58.9  | 3417 |
| IYIKQIKTF   | 9  | 0.0027  | RBL2     | ENSG00000103479.16 | ENSP00000262133.6 | 58.9  | 3417 |
| EYLRFLQTI   | 9  | 0.0273  | ITPR2    | ENSG00000123104.12 | ENSP00000370744.3 | 19.5  | 8103 |
| RQYLAINQI   | 9  | 2.0411  | ITPR2    | ENSG00000123104.12 | ENSP00000370744.3 | 19.5  | 8103 |
| QYPVIIHLI   | 9  | 0.0054  | ELOVL1   | ENSG00000066322.15 | ENSP00000361536.3 | 55.3  | 837  |
| HQFQCSRL    | 8  | 20.5556 | BABAM2   | ENSG00000158019.20 | ENSP00000343412.2 | 43.8  | 1245 |
| DISHIGSMR   | 9  | 42.0000 | H2AFY2   | ENSG00000099284.14 | ENSP00000362352.3 | 19.0  | 1116 |
| NYLSIFRKF   | 9  | 0.0064  | CAPN1    | ENSG00000014216.15 | ENSP00000279247.6 | 98.5  | 2142 |

|             |    |         |         |                    |                   |       |      |
|-------------|----|---------|---------|--------------------|-------------------|-------|------|
| NYFRGYEW    | 8  | 0.3996  | GALC    | ENSG00000054983.17 | ENSP00000261304.2 | 23.2  | 2055 |
| SQFELLKV    | 8  | 14.7222 | RPS6KA2 | ENSG00000071242.12 | ENSP00000265678.4 | 19.1  | 2199 |
| VYAQVARLF   | 9  | 0.0034  | SIN3A   | ENSG00000169375.15 | ENSP00000378403.4 | 22.9  | 3819 |
| EVIHRKALQR  | 10 | 46.0000 | SIN3A   | ENSG00000169375.15 | ENSP00000378403.4 | 22.9  | 3819 |
| EYVNDFDLLKF | 11 | 0.2270  | MAFB    | ENSG00000204103.4  | ENSP00000362410.2 | 18.2  | 969  |
| YPDGIRHI    | 8  | 2.2267  | SF3B3   | ENSG00000189091.13 | ENSP00000305790.5 | 23.4  | 3651 |
| VYPDGIRHI   | 9  | 0.0220  | SF3B3   | ENSG00000189091.13 | ENSP00000305790.5 | 23.4  | 3651 |
| NYISGIQTI   | 9  | 0.0088  | SF3B3   | ENSG00000189091.13 | ENSP00000305790.5 | 23.4  | 3651 |
| RTFAHYATF   | 9  | 0.3022  | FCN3    | ENSG00000142748.12 | ENSP00000270879.4 | 23.8  | 897  |
| FYLEGGFSKF  | 10 | 0.0183  | DUSP6   | ENSG00000139318.8  | ENSP00000279488.6 | 22.3  | 1143 |
| SYLPFTEAF   | 9  | 0.0021  | SELENON | ENSG00000162430.17 | ENSP00000355141.2 | 26.6  | 1770 |
| YYVRILSTI   | 9  | 0.0342  | PSMC4   | ENSG00000013275.7  | ENSP00000413869.1 | 112.1 | 1161 |
| RYRPQHIF    | 9  | 0.0206  | CYB561  | ENSG00000008283.16 | ENSP00000376702.1 | 48.0  | 753  |
| KYMPNVKVAVF | 11 | 0.0325  | DDX39B  | ENSG00000198563.14 | ENSP00000399371.1 | 153.2 | 867  |
| HYGKVYLL    | 8  | 0.3747  | VPS41   | ENSG00000006715.16 | ENSP00000309457.4 | 21.1  | 2562 |
| RYVEIVSQF   | 9  | 0.0015  | VPS41   | ENSG00000006715.16 | ENSP00000309457.4 | 21.1  | 2562 |
| YQHLLVNSI   | 9  | 2.7948  | ARMCX2  | ENSG00000184867.14 | ENSP00000328631.2 | 27.9  | 1896 |
| RYLVEVEEL   | 9  | 0.0556  | PDRG1   | ENSG00000088356.6  | ENSP00000202017.4 | 17.8  | 399  |
| QQWPVRSI    | 8  | 8.4347  | XPO6    | ENSG00000169180.11 | ENSP00000302790.4 | 30.9  | 3375 |
| EVFANRFTQM  | 10 | 7.5680  | DENND5A | ENSG00000184014.8  | ENSP00000435866.1 | 28.4  | 3723 |
| EYLIVFPKL   | 9  | 0.0837  | MARCH5  | ENSG00000198060.10 | ENSP00000351813.2 | 20.1  | 834  |
| EYAKIEETM   | 9  | 0.2458  | CADPS2  | ENSG00000081803.16 | ENSP00000400401.2 | 24.3  | 3765 |
| RYGSDFYSM   | 9  | 0.0649  | AMZ2    | ENSG00000196704.12 | ENSP00000464133.1 | 47.8  | 1080 |
| IYQDSFEQRF  | 10 | 0.0057  | CUL4B   | ENSG00000158290.16 | ENSP00000360373.5 | 19.2  | 2685 |
| NYQKRFQNL   | 9  | 0.0611  | OGFR    | ENSG00000060491.16 | ENSP00000359491.1 | 34.3  | 1875 |
| ETVEKFRQR   | 9  | 16.7636 | COMMD10 | ENSG00000145781.9  | ENSP00000488332.1 | 20.7  | 564  |
| KWLTKS FHF  | 9  | 0.0244  | SLC35C2 | ENSG00000080189.15 | ENSP00000318960.9 | 32.4  | 1182 |

|             |    |         |            |                    |                   |      |      |
|-------------|----|---------|------------|--------------------|-------------------|------|------|
| KYQDILNEI   | 9  | 0.0182  | IQGAP2     | ENSG00000145703.16 | ENSP00000274364.6 | 63.1 | 4725 |
| SYLSRLQYF   | 9  | 0.0028  | IQGAP2     | ENSG00000145703.16 | ENSP00000274364.6 | 63.1 | 4725 |
| TYPEVKKNKL  | 9  | 0.0417  | IQGAP2     | ENSG00000145703.16 | ENSP00000274364.6 | 63.1 | 4725 |
| DVYDRKNIPR  | 10 | 17.8222 | IQGAP2     | ENSG00000145703.16 | ENSP00000274364.6 | 63.1 | 4725 |
| ETLEGWKATRR | 11 | 51.2500 | DDN        | ENSG00000181418.8  | ENSP00000390590.2 | 17.5 | 2133 |
| RYMILGQNGF  | 10 | 0.0911  | PGM5       | ENSG00000154330.13 | ENSP00000379678.1 | 19.0 | 1701 |
| ETPSAPLLSR  | 10 | 24.0714 | PNPLA6     | ENSG00000032444.16 | ENSP00000473211.1 | 58.0 | 4095 |
| KYIQGLKRL   | 9  | 0.0754  | PRPF18     | ENSG00000165630.14 | ENSP00000367835.3 | 19.1 | 1026 |
| EVAQFLTGR   | 9  | 20.5556 | DESI1      | ENSG00000100418.8  | ENSP00000263256.6 | 18.7 | 504  |
| IYYIDMQKF   | 9  | 0.0056  | KCTD3      | ENSG00000136636.13 | ENSP00000259154.2 | 18.3 | 2445 |
| SYNEHWNYL   | 9  | 0.0269  | AC005840.1 | ENSG00000111321.11 | ENSP00000228918.4 | 65.2 | 1305 |
| SYITEECLKKL | 11 | 0.8048  | UBE3C      | ENSG00000009335.18 | ENSP00000309198.8 | 19.3 | 3249 |
| AYNPMARDLF  | 10 | 0.0647  | MTOR       | ENSG00000198793.12 | ENSP00000354558.4 | 32.1 | 7647 |
| DIIADISNR   | 9  | 33.0000 | SCIN       | ENSG00000006747.15 | ENSP00000297029.5 | 30.6 | 2145 |
| TYPRGQIIYTW | 11 | 0.0825  | SCIN       | ENSG00000006747.15 | ENSP00000297029.5 | 30.6 | 2145 |
| RYVMTTTTL   | 9  | 0.0529  | EIF2S1     | ENSG00000134001.13 | ENSP00000256383.4 | 18.4 | 945  |
| VYIGKLNMI   | 9  | 0.0190  | XPO1       | ENSG00000082898.16 | ENSP00000385942.2 | 33.2 | 3213 |
| QYEEQFVTL   | 9  | 0.0796  | XPO1       | ENSG00000082898.16 | ENSP00000385942.2 | 33.2 | 3213 |
| VYLAAVNRL   | 9  | 0.0222  | PLXND1     | ENSG00000004399.12 | ENSP00000317128.4 | 37.0 | 5775 |
| HQITVLHV    | 8  | 19.0968 | ELOVL5     | ENSG00000012660.14 | ENSP00000306640.6 | 39.2 | 897  |
| KYITQGQLL   | 9  | 0.0246  | ELOVL5     | ENSG00000012660.14 | ENSP00000306640.6 | 39.2 | 897  |
| KYITQGQLLQF | 11 | 0.0263  | ELOVL5     | ENSG00000012660.14 | ENSP00000306640.6 | 39.2 | 897  |
| NYAVVYYHL   | 9  | 0.0406  | IFIT3      | ENSG00000119917.14 | ENSP00000360883.4 | 22.1 | 1470 |
| SYFEHNLETW  | 10 | 0.0226  | GNL1       | ENSG00000204590.12 | ENSP00000365806.3 | 25.4 | 1821 |
| YTDVKHRW    | 8  | 1.2624  | DNASE1L3   | ENSG00000163687.13 | ENSP00000378053.2 | 38.9 | 915  |
| PYMDSPQSIGF | 11 | 0.0434  | PCMT1      | ENSG00000120265.17 | ENSP00000356354.3 | 33.8 | 684  |
| AQLAVTKI    | 8  | 17.6000 | UBR7       | ENSG00000012963.15 | ENSP00000013070.6 | 17.8 | 1275 |

|              |    |         |          |                    |                   |      |      |
|--------------|----|---------|----------|--------------------|-------------------|------|------|
| KYNDNFFGL    | 9  | 0.0439  | UBR7     | ENSG00000012963.15 | ENSP00000013070.6 | 17.8 | 1275 |
| VWNPRTHQF    | 9  | 0.0075  | ATP1B2   | ENSG00000129244.9  | ENSP00000250111.4 | 16.7 | 870  |
| KYTKNIVSW    | 9  | 0.0096  | ARHGAP29 | ENSG00000137962.13 | ENSP00000260526.6 | 18.9 | 3783 |
| EVFDHMMKR    | 9  | 13.0631 | USP9X    | ENSG00000124486.13 | ENSP00000367558.2 | 24.1 | 7662 |
| RYMPDICVI    | 9  | 0.1224  | USP9X    | ENSG00000124486.13 | ENSP00000367558.2 | 24.1 | 7662 |
| EVFDHMMKRM   | 10 | 14.7556 | USP9X    | ENSG00000124486.13 | ENSP00000367558.2 | 24.1 | 7662 |
| YQIAVTKV     | 8  | 8.7479  | SMC1A    | ENSG00000072501.17 | ENSP00000323421.3 | 40.7 | 3699 |
| VYLTDPQGL    | 9  | 0.1031  | FCSK     | ENSG00000157353.17 | ENSP00000288078.6 | 25.6 | 3252 |
| VYNHRFHKI    | 9  | 0.0309  | USP4     | ENSG00000114316.12 | ENSP00000341028.4 | 35.8 | 2748 |
| VFTEVANLF    | 9  | 0.0222  | SIN3B    | ENSG00000127511.9  | ENSP00000248054.4 | 42.4 | 3390 |
| TYLDKVENI    | 9  | 0.0127  | IFIT1    | ENSG00000185745.10 | ENSP00000360869.3 | 16.7 | 1434 |
| NYTDIKDYL    | 9  | 0.2450  | NUDT12   | ENSG00000112874.10 | ENSP00000230792.2 | 18.9 | 1386 |
| RYQTQPRTL    | 9  | 0.0166  | SVIL     | ENSG00000197321.14 | ENSP00000364549.3 | 50.4 | 5364 |
| VYNSEYYHF    | 9  | 0.0011  | PTK7     | ENSG00000112655.16 | ENSP00000418754.1 | 22.0 | 3234 |
| VFIDKQTNL    | 9  | 0.2593  | CELF1    | ENSG00000149187.18 | ENSP00000378705.2 | 29.3 | 1455 |
| PYYPSPGVLF   | 10 | 0.0136  | HP1BP3   | ENSG00000127483.18 | ENSP00000364142.2 | 98.8 | 1203 |
| AWPKVLKI     | 8  | 1.0777  | EPB41L3  | ENSG00000082397.17 | ENSP00000442091.2 | 76.1 | 2595 |
| HQLILSKL     | 8  | 12.3333 | SMAP1    | ENSG00000112305.14 | ENSP00000313382.5 | 20.1 | 1320 |
| EVFDFRGMRL   | 10 | 8.8067  | NCKAP1   | ENSG00000061676.15 | ENSP00000355348.3 | 19.8 | 3384 |
| RYASINTHL    | 9  | 0.0285  | CSNK1E   | ENSG00000213923.12 | ENSP00000380044.1 | 76.8 | 1248 |
| TYKVISNEF    | 9  | 0.0172  | UBE3A    | ENSG00000114062.20 | ENSP00000486349.1 | 25.0 | 2556 |
| VYSRDPNYL    | 9  | 0.0845  | UBE3A    | ENSG00000114062.20 | ENSP00000486349.1 | 25.0 | 2556 |
| ELIELRELGAAR | 12 | 56.6667 | SMU1     | ENSG00000122692.9  | ENSP00000380336.3 | 15.5 | 1539 |
| RYVPRASYF    | 9  | 0.0061  | CCND3    | ENSG00000112576.12 | ENSP00000397545.2 | 31.7 | 660  |
| ETTSIATAR    | 9  | 32.0000 | ZMYM3    | ENSG00000147130.14 | ENSP00000322845.5 | 19.0 | 4110 |
| EVFDERAANF   | 10 | 2.5226  | VCL      | ENSG00000035403.17 | ENSP00000361841.3 | 26.8 | 3198 |
| PYNPIIGETF   | 10 | 0.0216  | OSBPL8   | ENSG00000091039.17 | ENSP00000478240.1 | 28.2 | 2541 |

|             |    |         |         |                    |                   |      |       |
|-------------|----|---------|---------|--------------------|-------------------|------|-------|
| KYFAQALKL   | 9  | 0.0348  | EMC2    | ENSG00000104412.8  | ENSP00000220853.3 | 19.1 | 891   |
| ETVNLRLSLGF | 10 | 10.4237 | CRYBG1  | ENSG00000112297.15 | ENSP00000358062.3 | 16.1 | 5169  |
| SYQKVMALW   | 9  | 0.0167  | MACF1   | ENSG00000127603.26 | ENSP00000499399.1 | 88.3 | 16137 |
| RYQDIIHSI   | 9  | 0.0020  | BAZ1B   | ENSG00000009954.11 | ENSP00000385442.1 | 22.9 | 4449  |
| SYAETPLQL   | 9  | 0.0237  | ABTB2   | ENSG00000166016.6  | ENSP00000410157.2 | 15.3 | 3075  |
| EVISLINTR   | 9  | 18.1579 | FAF2    | ENSG00000113194.13 | ENSP00000261942.6 | 16.6 | 1335  |
| AYLDKSPQF   | 9  | 0.0061  | DHX29   | ENSG00000067248.10 | ENSP00000481966.1 | 21.5 | 4110  |
| IYFQAPVKI   | 9  | 0.0096  | DHX29   | ENSG00000067248.10 | ENSP00000481966.1 | 21.5 | 4110  |
| VYLRETTLI   | 9  | 0.0162  | DHX29   | ENSG00000067248.10 | ENSP00000481966.1 | 21.5 | 4110  |
| SYLERYQRF   | 9  | 0.0021  | TNK2    | ENSG00000061938.18 | ENSP00000329425.6 | 17.0 | 3114  |
| DIADFFTTR   | 9  | 15.4493 | RIPOR3  | ENSG00000042062.12 | ENSP00000045083.2 | 43.1 | 2838  |
| FYMDTSHLF   | 9  | 0.0010  | PRRC2C  | ENSG00000117523.16 | ENSP00000410219.3 | 27.8 | 8451  |
| EVFPEHLARF  | 10 | 0.4834  | LATS2   | ENSG00000150457.9  | ENSP00000372035.4 | 15.7 | 3264  |
| KYVENFGLI   | 9  | 0.1207  | SPCS2   | ENSG00000118363.12 | ENSP00000263672.6 | 35.8 | 678   |
| VGYLVRLV    | 8  | 26.9000 | FZD8    | ENSG00000177283.7  | ENSP00000363826.1 | 15.0 | 2082  |
| EVHRANITQSR | 11 | 31.6667 | FRMD3   | ENSG00000172159.16 | ENSP00000303508.3 | 18.2 | 1791  |
| AYVEKVERL   | 9  | 0.0429  | AMOTL2  | ENSG00000114019.14 | ENSP00000424765.1 | 41.5 | 2511  |
| KYLEERAMRQF | 11 | 0.0864  | AMOTL2  | ENSG00000114019.14 | ENSP00000424765.1 | 41.5 | 2511  |
| KYLGQLHYL   | 9  | 0.0108  | PTPN23  | ENSG00000076201.15 | ENSP00000265562.4 | 18.0 | 4908  |
| KYMEVHEKASF | 11 | 0.0153  | PTPN23  | ENSG00000076201.15 | ENSP00000265562.4 | 18.0 | 4908  |
| IYQREWQRF   | 9  | 0.0043  | ACTR8   | ENSG00000113812.14 | ENSP00000419429.1 | 20.6 | 1539  |
| EVLKETVSQR  | 10 | 36.6667 | DCTN1   | ENSG00000204843.12 | ENSP00000386406.1 | 63.6 | 3708  |
| IYSTPLPEKF  | 10 | 0.0051  | KLF3    | ENSG00000109787.13 | ENSP00000261438.5 | 17.4 | 1035  |
| TYNPNMPFKW  | 10 | 0.0422  | CCAR1   | ENSG00000060339.14 | ENSP00000438610.1 | 41.8 | 2316  |
| IYIDRFEDL   | 9  | 0.0541  | ARL14EP | ENSG00000152219.5  | ENSP00000282032.3 | 15.9 | 780   |
| QYLSSIQHL   | 9  | 0.0080  | PEX3    | ENSG00000034693.15 | ENSP00000356563.4 | 15.4 | 1119  |
| SYLDSIHFF   | 9  | 0.0009  | CREBBP  | ENSG00000005339.14 | ENSP00000262367.5 | 25.2 | 7326  |

|              |    |         |         |                    |                   |       |      |
|--------------|----|---------|---------|--------------------|-------------------|-------|------|
| KYMDIEFDF    | 9  | 0.0087  | MYO1B   | ENSG00000128641.19 | ENSP00000341903.4 | 25.5  | 3234 |
| VYTKANPTF    | 9  | 0.0032  | SPRED2  | ENSG00000198369.10 | ENSP00000348753.4 | 17.0  | 1254 |
| RFIQLLKV     | 8  | 4.9357  | ABCD4   | ENSG00000119688.21 | ENSP00000436782.1 | 52.9  | 168  |
| YYTPITPHL    | 9  | 0.0047  | PTBP3   | ENSG00000119314.15 | ENSP00000363375.1 | 20.2  | 1572 |
| PYP PPPPEF   | 9  | 0.0069  | WBP2    | ENSG00000132471.12 | ENSP00000466999.1 | 80.2  | 693  |
| HGLEMRTI     | 8  | 22.2632 | JADE2   | ENSG00000043143.20 | ENSP00000378451.1 | 38.4  | 2370 |
| RYLDFKVTEGSF | 12 | 0.1051  | GDI2    | ENSG00000057608.17 | ENSP00000476707.1 | 178.6 | 390  |
| KYLESVKPF    | 9  | 0.0194  | CROT    | ENSG00000005469.11 | ENSP00000331981.3 | 17.0  | 1836 |
| NYNDVYSAF    | 9  | 0.0197  | RASL11B | ENSG00000128045.7  | ENSP00000248706.3 | 14.8  | 744  |
| VYRQDCETF    | 9  | 0.0353  | PPHLN1  | ENSG00000134283.17 | ENSP00000447168.1 | 23.9  | 1155 |
| AFKHKHHLI    | 9  | 0.6469  | ZEB2    | ENSG00000169554.21 | ENSP00000302501.4 | 33.9  | 3639 |
| AYRRIFQKF    | 9  | 0.0296  | MYO1E   | ENSG00000157483.8  | ENSP00000288235.4 | 15.5  | 3324 |
| RYAILTKATW   | 10 | 0.1595  | MYO1E   | ENSG00000157483.8  | ENSP00000288235.4 | 15.5  | 3324 |
| LYSSKLYRF    | 9  | 0.0036  | KCTD20  | ENSG00000112078.14 | ENSP00000412205.2 | 22.3  | 759  |
| YYSPHGHIL    | 9  | 0.0164  | EIF2A   | ENSG00000144895.12 | ENSP00000417229.1 | 36.5  | 1755 |
| YYSPHGHILVL  | 11 | 0.1875  | EIF2A   | ENSG00000144895.12 | ENSP00000417229.1 | 36.5  | 1755 |
| VYLDVQEKW    | 9  | 0.0052  | DNASE1  | ENSG00000213918.10 | ENSP00000385905.1 | 51.3  | 846  |
| AYGASFLSF    | 9  | 0.0097  | TMEM69  | ENSG00000159596.7  | ENSP00000361095.4 | 18.7  | 741  |
| KYIQRQETI    | 9  | 0.0202  | MX1     | ENSG00000157601.14 | ENSP00000381599.3 | 20.0  | 1986 |
| EYLSRHWLF    | 9  | 0.0066  | GGCX    | ENSG00000115486.12 | ENSP00000233838.3 | 19.4  | 2274 |
| KYLDGLDVCRF  | 11 | 0.0759  | GGCX    | ENSG00000115486.12 | ENSP00000233838.3 | 19.4  | 2274 |
| EVIQAYETL    | 9  | 3.3659  | SYMPK   | ENSG00000125755.18 | ENSP00000478599.1 | 42.4  | 3174 |
| SYLHEPAVL    | 9  | 0.0862  | MYO5B   | ENSG00000167306.20 | ENSP00000285039.6 | 21.4  | 5544 |
| RYKEKVAEL    | 9  | 0.0759  | KAT7    | ENSG00000136504.12 | ENSP00000409477.2 | 19.3  | 1275 |
| AYKKTHTL     | 9  | 0.0673  | TPD52L1 | ENSG00000111907.21 | ENSP00000357387.5 | 46.9  | 432  |
| SQRFTVQI     | 8  | 14.4444 | TAF9B   | ENSG00000187325.5  | ENSP00000339917.5 | 14.0  | 753  |
| KYTTLIAKL    | 9  | 0.0439  | TES     | ENSG00000135269.18 | ENSP00000350937.4 | 19.5  | 1263 |

|             |    |         |          |                    |                   |      |       |
|-------------|----|---------|----------|--------------------|-------------------|------|-------|
| RYPNSHTHYF  | 10 | 0.0083  | CNOT1    | ENSG00000125107.18 | ENSP00000320949.5 | 48.7 | 7128  |
| EYIRSLNQF   | 9  | 0.0080  | RMC1     | ENSG00000141452.9  | ENSP00000467007.1 | 24.2 | 1827  |
| SYTRLFSNF   | 9  | 0.0087  | UBP1     | ENSG00000153560.12 | ENSP00000395558.2 | 22.7 | 1512  |
| AQFQVHHI    | 8  | 6.4570  | LAMC3    | ENSG00000050555.18 | ENSP00000354360.4 | 15.5 | 4725  |
| TYAELMQTL   | 9  | 0.0090  | MRPS33   | ENSG00000090263.16 | ENSP00000420709.1 | 31.4 | 288   |
| RQHEIVLKV   | 9  | 2.7243  | NUP133   | ENSG00000069248.12 | ENSP00000261396.3 | 14.4 | 3468  |
| VFTSVRQKI   | 9  | 0.3510  | SMARCA4  | ENSG00000127616.18 | ENSP00000496004.1 | 46.7 | 4365  |
| SYSHIMALI   | 9  | 0.0869  | FDPS     | ENSG00000160752.14 | ENSP00000391755.1 | 99.4 | 1059  |
| DIMDSSLTRR  | 10 | 30.6667 | FDPS     | ENSG00000160752.14 | ENSP00000391755.1 | 99.4 | 1059  |
| PYTKVEESF   | 9  | 0.0412  | ALG12    | ENSG00000182858.14 | ENSP00000333813.5 | 15.7 | 1464  |
| VYTSVVEEL   | 9  | 0.0209  | MAN2B2   | ENSG00000013288.8  | ENSP00000285599.3 | 26.3 | 3027  |
| YYPNPPLVL   | 9  | 0.0318  | NT5DC1   | ENSG00000178425.14 | ENSP00000326858.3 | 18.1 | 1365  |
| EYLENALKL   | 9  | 0.1132  | GBP4     | ENSG00000162654.9  | ENSP00000359490.5 | 14.2 | 1920  |
| AYINRASLL   | 9  | 0.1419  | COPS4    | ENSG00000138663.9  | ENSP00000424655.1 | 27.8 | 1260  |
| KYHIVKQIF   | 9  | 0.0238  | HERC3    | ENSG00000138641.18 | ENSP00000385684.1 | 16.3 | 3150  |
| NYITAALKL   | 9  | 0.1203  | HERC3    | ENSG00000138641.18 | ENSP00000385684.1 | 16.3 | 3150  |
| MYLKTVDKF   | 9  | 0.0039  | TRAPPC2B | ENSG00000256060.2  | ENSP00000442778.1 | 14.2 | 420   |
| YYQDTPKQI   | 9  | 0.0313  | NOP16    | ENSG00000048162.20 | ENSP00000480832.1 | 20.7 | 534   |
| EVLETRVMER  | 10 | 32.4000 | CSTF2T   | ENSG00000177613.8  | ENSP00000332444.4 | 13.6 | 1848  |
| RYFPDRNVALF | 11 | 0.0098  | INPP5E   | ENSG00000148384.13 | ENSP00000360777.3 | 14.2 | 1932  |
| RYPLLLQKI   | 9  | 0.0121  | ARHGEF37 | ENSG00000183111.12 | ENSP00000328083.6 | 14.5 | 2025  |
| RYIHPQQEAF  | 10 | 0.0198  | CPSF1    | ENSG00000071894.17 | ENSP00000484669.1 | 49.7 | 4329  |
| RYAALRELI   | 9  | 0.1220  | CCDC97   | ENSG00000142039.4  | ENSP00000269967.2 | 17.2 | 1029  |
| NYIKSLSSF   | 9  | 0.0075  | SMG1     | ENSG00000157106.16 | ENSP00000402515.2 | 19.4 | 10983 |
| RYMPQNPFI   | 9  | 0.0093  | RBBP7    | ENSG00000102054.17 | ENSP00000369427.2 | 52.8 | 1275  |
| RYMPQNPFI   | 10 | 0.0583  | RBBP7    | ENSG00000102054.17 | ENSP00000369427.2 | 52.8 | 1275  |
| AYLEAYKEF   | 9  | 0.0072  | ETNK1    | ENSG00000139163.15 | ENSP00000266517.3 | 15.3 | 1356  |

|             |    |         |          |                    |                    |      |      |
|-------------|----|---------|----------|--------------------|--------------------|------|------|
| DLPSFGRVR   | 9  | 26.7000 | TRAPPC11 | ENSG00000168538.16 | ENSP00000335371.6  | 14.5 | 3399 |
| TYLKAVKLF   | 9  | 0.0042  | IREB2    | ENSG00000136381.13 | ENSP00000258886.8  | 15.5 | 2889 |
| KYITDWQNVF  | 10 | 0.0204  | PDCD6    | ENSG00000249915.8  | ENSP00000423815.1  | 63.5 | 567  |
| NYIRITSEI   | 9  | 0.0812  | DHX32    | ENSG00000089876.11 | ENSP00000284690.3  | 19.9 | 2229 |
| SYGSVFKAI   | 9  | 0.1405  | STK3     | ENSG00000104375.17 | ENSP00000390500.2  | 14.7 | 1473 |
| EVMQAVARL   | 9  | 7.4740  | TCAF1    | ENSG00000198420.10 | ENSP00000419235.1  | 15.8 | 2763 |
| AYLPEWKENI  | 10 | 0.3860  | TCAF1    | ENSG00000198420.10 | ENSP00000419235.1  | 15.8 | 2763 |
| LYVVDLKKF   | 9  | 0.0867  | UGGT1    | ENSG00000136731.12 | ENSP00000259253.6  | 14.4 | 4665 |
| SYTSVKENF   | 9  | 0.0066  | FAM120B  | ENSG00000112584.13 | ENSP00000417970.1  | 14.1 | 2730 |
| VQYDVRGI    | 8  | 16.3455 | MYO10    | ENSG00000145555.15 | ENSP00000274203.10 | 21.9 | 6207 |
| VYNNSSRF    | 9  | 0.0213  | MYO10    | ENSG00000145555.15 | ENSP00000274203.10 | 21.9 | 6207 |
| SYGKVTAEF   | 9  | 0.0034  | ALPK2    | ENSG00000198796.7  | ENSP00000354991.3  | 18.5 | 6510 |
| IYIDRGVVF   | 9  | 0.0083  | TFIP11   | ENSG00000100109.17 | ENSP00000384297.1  | 25.1 | 2511 |
| YYAEVETRI   | 9  | 0.0558  | EXOC2    | ENSG00000112685.14 | ENSP00000230449.4  | 13.9 | 2772 |
| HYQQHPLHL   | 9  | 0.0370  | KIF1B    | ENSG00000054523.17 | ENSP00000366290.1  | 19.0 | 5448 |
| VYLKEANAI   | 9  | 0.0941  | KIF1B    | ENSG00000054523.17 | ENSP00000366290.1  | 19.0 | 5448 |
| VYNDIGKEMLL | 11 | 0.2005  | KIF1B    | ENSG00000054523.17 | ENSP00000366290.1  | 19.0 | 5448 |
| KYGLGFQII   | 9  | 0.1269  | PTPN13   | ENSG00000163629.13 | ENSP00000408368.2  | 29.8 | 7398 |
| AVIGYLSRTR  | 9  | 9.8029  | NOP9     | ENSG00000196943.14 | ENSP00000267425.3  | 13.7 | 1908 |
| RWFTHASPTL  | 10 | 0.5035  | RRM1     | ENSG00000167325.15 | ENSP00000300738.5  | 17.4 | 2376 |
| SQYNIRGV    | 8  | 26.4000 | UBA3     | ENSG00000144744.17 | ENSP00000354340.4  | 29.9 | 1389 |
| GYASRFIVI   | 9  | 0.2298  | RPIA     | ENSG00000153574.9  | ENSP00000283646.3  | 13.1 | 933  |
| VYIHPSSALF  | 10 | 0.0059  | DHX8     | ENSG00000067596.11 | ENSP00000262415.2  | 19.9 | 3660 |
| VYLPLTSHI   | 9  | 0.0047  | SNX8     | ENSG00000106266.11 | ENSP00000222990.3  | 14.3 | 1395 |
| RYMQWRETM   | 9  | 0.0438  | ITPKC    | ENSG00000086544.3  | ENSP00000263370.1  | 13.1 | 2049 |
| SYQSQINHI   | 9  | 0.0181  | DDX50    | ENSG00000107625.13 | ENSP00000362687.3  | 27.6 | 2211 |
| RYMDLAENARF | 11 | 0.0206  | SPECC1L  | ENSG00000100014.20 | ENSP00000499052.1  | 15.9 | 3408 |

|             |    |         |            |                    |                   |      |       |
|-------------|----|---------|------------|--------------------|-------------------|------|-------|
| KYAKLEEKL   | 9  | 0.0889  | GOLGB1     | ENSG00000173230.15 | ENSP00000377275.3 | 23.6 | 9807  |
| RYQEKISAL   | 9  | 0.0577  | GOLGB1     | ENSG00000173230.15 | ENSP00000377275.3 | 23.6 | 9807  |
| FYNLLTRTF   | 9  | 0.0171  | PIGT       | ENSG00000124155.18 | ENSP00000443963.3 | 57.5 | 1152  |
| AYTDCIPQL   | 9  | 0.1422  | KIFAP3     | ENSG00000075945.13 | ENSP00000444622.1 | 22.7 | 2142  |
| NYNEKIYEL   | 9  | 0.0292  | UFD1       | ENSG00000070010.19 | ENSP00000263202.9 | 31.1 | 921   |
| HQGILSRV    | 8  | 31.1667 | NUP153     | ENSG00000124789.11 | ENSP00000262077.2 | 13.6 | 4425  |
| RYLNSQQQYF  | 10 | 0.0203  | NFRKB      | ENSG00000170322.14 | ENSP00000400476.2 | 15.6 | 3897  |
| RFYNHPLHF   | 9  | 0.0064  | CNNM3      | ENSG00000168763.16 | ENSP00000305449.3 | 14.5 | 2121  |
| KYQDVYVEL   | 9  | 0.0072  | TRIOBP     | ENSG00000100106.22 | ENSP00000496394.1 | 28.9 | 7095  |
| SQLQALHI    | 8  | 12.2778 | ROCK2      | ENSG00000134318.14 | ENSP00000317985.6 | 13.2 | 4164  |
| SSYVVKKV    | 8  | 25.4167 | HERC2      | ENSG00000128731.17 | ENSP00000261609.7 | 17.4 | 14502 |
| VYIHHFDRI   | 9  | 0.0327  | MOB3A      | ENSG00000172081.14 | ENSP00000466249.1 | 26.2 | 651   |
| EYDNFFQHL   | 9  | 0.1338  | CLASP1     | ENSG00000074054.18 | ENSP00000386442.3 | 23.3 | 4413  |
| GVISMPVAAR  | 10 | 41.5000 | FP565260.6 | ENSG00000280433.1  | ENSP00000485615.1 | 13.4 | 609   |
| VYTVHHVWV   | 9  | 0.0522  | MAST3      | ENSG00000099308.10 | ENSP00000262811.4 | 13.6 | 3927  |
| VYTGLFYKL   | 9  | 0.0073  | NUDT6      | ENSG00000170917.13 | ENSP00000306070.5 | 15.1 | 948   |
| KYFEKQFEL   | 9  | 0.0092  | TATDN1     | ENSG00000147687.19 | ENSP00000430274.1 | 26.3 | 966   |
| VYQEVQAMF   | 9  | 0.0022  | FAM98B     | ENSG00000171262.11 | ENSP00000380734.2 | 12.8 | 1299  |
| IYKDYQYYF   | 9  | 0.0028  | MRC1       | ENSG00000260314.3  | ENSP00000455897.1 | 12.4 | 4368  |
| KYTFFPAEHRF | 10 | 0.0095  | GDA        | ENSG00000119125.16 | ENSP00000436619.1 | 27.2 | 1362  |
| KQQKLWHLF   | 9  | 0.1720  | C16orf72   | ENSG00000182831.12 | ENSP00000331720.7 | 15.5 | 825   |
| KYFEVPSVL   | 9  | 0.0163  | ACTR10     | ENSG00000131966.14 | ENSP00000254286.4 | 32.5 | 1251  |
| IYFEYSHAF   | 9  | 0.0022  | MSH3       | ENSG00000113318.11 | ENSP00000499502.1 | 23.6 | 3216  |
| RYTPFSNGL   | 9  | 0.1258  | WDR59      | ENSG00000103091.15 | ENSP00000262144.6 | 31.2 | 2922  |
| TYADTLNHL   | 9  | 0.0244  | NBAS       | ENSG00000151779.13 | ENSP00000281513.5 | 15.4 | 7113  |
| RYLWISEKL   | 9  | 0.0254  | LRRC42     | ENSG00000116212.15 | ENSP00000360421.3 | 18.3 | 1284  |
| VYLDYIRVI   | 9  | 0.0297  | NUP98      | ENSG00000110713.17 | ENSP00000316032.7 | 20.9 | 5400  |

|            |    |         |         |                    |                   |      |      |
|------------|----|---------|---------|--------------------|-------------------|------|------|
| RYLEKSGVL  | 9  | 0.2609  | MYCBP   | ENSG00000214114.9  | ENSP00000380702.2 | 13.7 | 309  |
| YYITGNLETF | 10 | 0.0090  | SEL1L3  | ENSG00000091490.11 | ENSP00000264868.5 | 20.2 | 3291 |
| RYKDTINKI  | 9  | 0.0230  | ROCK1   | ENSG00000067900.8  | ENSP00000382697.1 | 13.5 | 4062 |
| RYPAIINYNI | 9  | 0.0087  | SLC35B1 | ENSG00000121073.14 | ENSP00000423323.1 | 39.1 | 681  |
| VYPEEHSRW  | 9  | 0.0249  | RSRP1   | ENSG00000117616.18 | ENSP00000243189.7 | 39.5 | 870  |
| RYLPQTYVV  | 9  | 0.0334  | ITM2A   | ENSG00000078596.11 | ENSP00000362395.2 | 25.7 | 789  |
| KYAPRFNGF  | 9  | 0.0078  | USP32   | ENSG00000170832.13 | ENSP00000300896.3 | 16.7 | 4812 |
| TWTEVSYTF  | 9  | 0.0087  | FBXO6   | ENSG00000116663.11 | ENSP00000365944.4 | 12.3 | 879  |
| AYAENIALL  | 9  | 0.0387  | PIK3R4  | ENSG00000196455.8  | ENSP00000349205.3 | 17.3 | 4074 |
| SYKYEHLRW  | 9  | 0.1621  | FLT4    | ENSG00000037280.16 | ENSP00000261937.6 | 16.5 | 4089 |
| KYGNLSNFL  | 9  | 0.1237  | FLT4    | ENSG00000037280.16 | ENSP00000261937.6 | 16.5 | 4089 |
| QTPQILVK   | 8  | 36.3333 | AKAP9   | ENSG00000127914.16 | ENSP00000378042.2 | 39.3 | 5307 |
| EVITNRPKGF | 10 | 7.9164  | AKAP9   | ENSG00000127914.16 | ENSP00000378042.2 | 39.3 | 5307 |
| VYVKHSISF  | 9  | 0.0038  | AP3M1   | ENSG00000185009.12 | ENSP00000347408.4 | 15.0 | 1254 |
| KYLHPPTHL  | 9  | 0.0187  | MBNL2   | ENSG00000139793.18 | ENSP00000432422.1 | 24.1 | 765  |
| IFTNTVARF  | 9  | 0.0604  | AKAP11  | ENSG00000023516.9  | ENSP00000025301.2 | 11.9 | 5703 |
| VYFGDPVSL  | 9  | 0.0276  | GNPAT   | ENSG00000116906.13 | ENSP00000355607.4 | 24.1 | 2040 |
| HYLNHWNHF  | 9  | 0.0057  | FN3KRP  | ENSG00000141560.15 | ENSP00000269373.6 | 20.3 | 927  |
| AYGGAFYAF  | 9  | 0.0102  | L3HYPDH | ENSG00000126790.12 | ENSP00000247194.4 | 23.4 | 1062 |
| DLIGQDLNSR | 10 | 42.5000 | FBRS    | ENSG00000156860.15 | ENSP00000348489.5 | 19.9 | 2940 |
| RYVFQSENTF | 10 | 0.0357  | SUFU    | ENSG00000107882.11 | ENSP00000358918.3 | 12.4 | 1452 |
| RQPSLFYHL  | 9  | 0.2162  | MAP3K5  | ENSG00000197442.10 | ENSP00000351908.4 | 12.0 | 4122 |
| SYLPISPTF  | 9  | 0.0007  | SLC23A2 | ENSG00000089057.15 | ENSP00000344322.1 | 12.3 | 1950 |
| QYVTQINRL  | 9  | 0.0954  | PREX1   | ENSG00000124126.14 | ENSP00000361009.3 | 15.4 | 4977 |
| EAYHRVFNVR | 10 | 15.9130 | NT5C2   | ENSG00000076685.18 | ENSP00000383960.3 | 41.4 | 1683 |
| HYIDAGYLGf | 10 | 0.0205  | GTF3C2  | ENSG00000115207.13 | ENSP00000264720.3 | 23.3 | 2733 |
| PYCSPPMTF  | 9  | 0.0224  | HCFC1R1 | ENSG00000103145.10 | ENSP00000460639.1 | 42.6 | 414  |

|             |    |         |         |                    |                   |      |       |
|-------------|----|---------|---------|--------------------|-------------------|------|-------|
| ELPIVTPALR  | 10 | 26.0000 | KPNA2   | ENSG00000182481.9  | ENSP00000332455.3 | 12.7 | 1587  |
| EQYRQVISV   | 9  | 8.4538  | VPS11   | ENSG00000160695.14 | ENSP00000481126.1 | 40.7 | 2823  |
| TQRIFQEAV   | 9  | 18.5789 | NRARP   | ENSG00000198435.4  | ENSP00000349041.2 | 11.7 | 342   |
| AYSAKIALF   | 9  | 0.0062  | DPYD    | ENSG00000188641.13 | ENSP00000359211.3 | 12.7 | 3075  |
| AQRAFILTV   | 9  | 6.4542  | CABIN1  | ENSG00000099991.18 | ENSP00000381364.2 | 31.8 | 6660  |
| WYMDNPQNL   | 9  | 0.0562  | PLEKHA2 | ENSG00000169499.15 | ENSP00000482228.1 | 17.0 | 1275  |
| IYHPNVDKL   | 9  | 0.0167  | UBE2N   | ENSG00000177889.10 | ENSP00000316176.2 | 13.8 | 456   |
| QYLMDNPTF   | 9  | 0.0240  | PRPF40A | ENSG00000196504.16 | ENSP00000386458.2 | 21.2 | 2982  |
| NYAWVYYHM   | 9  | 0.1280  | IFIT2   | ENSG00000119922.10 | ENSP00000490935.1 | 12.4 | 1416  |
| PYFSGSSTF   | 9  | 0.0164  | KIF21A  | ENSG00000139116.18 | ENSP00000445606.2 | 26.7 | 4911  |
| PYLGQAPFL   | 9  | 0.1656  | SYNRG   | ENSG00000275066.5  | ENSP00000483453.1 | 16.0 | 3942  |
| GYPEVALHF   | 9  | 0.0050  | COPA    | ENSG00000122218.16 | ENSP00000357048.3 | 75.3 | 3699  |
| SYNPAENAVLL | 11 | 0.2088  | COPA    | ENSG00000122218.16 | ENSP00000357048.3 | 75.3 | 3699  |
| NYPDEFTKL   | 9  | 0.0704  | NF1     | ENSG00000196712.17 | ENSP00000351015.4 | 16.0 | 8517  |
| HYTIVFNTE   | 9  | 0.0053  | ATP2B4  | ENSG00000058668.14 | ENSP00000340930.2 | 14.1 | 3510  |
| IFIDPGYQTF  | 10 | 0.0117  | ZMYM2   | ENSG00000121741.16 | ENSP00000372324.2 | 18.7 | 4131  |
| AYAPPPHVI   | 9  | 0.0079  | APOL2   | ENSG00000128335.14 | ENSP00000351292.5 | 15.9 | 1011  |
| YYIFIPSKF   | 9  | 0.0026  | DDX47   | ENSG00000213782.7  | ENSP00000350698.3 | 30.3 | 1365  |
| WVIGSVVAR   | 9  | 32.6000 | GART    | ENSG00000159131.17 | ENSP00000371236.4 | 20.6 | 3030  |
| RYNEKCFKL   | 9  | 0.0692  | KLHL24  | ENSG00000114796.16 | ENSP00000395012.1 | 16.3 | 1800  |
| YWMHVQNTF   | 9  | 0.0130  | KLHL24  | ENSG00000114796.16 | ENSP00000395012.1 | 16.3 | 1800  |
| QSTRLPLI    | 8  | 18.3947 | PRKDC   | ENSG00000253729.7  | ENSP00000345182.4 | 16.3 | 12291 |
| PYRLIFEKF   | 9  | 0.1154  | PRKDC   | ENSG00000253729.7  | ENSP00000345182.4 | 16.3 | 12291 |
| LYQRAFQHL   | 9  | 0.0160  | PRKDC   | ENSG00000253729.7  | ENSP00000345182.4 | 16.3 | 12291 |
| TYKDYVDLF   | 9  | 0.0058  | PRKDC   | ENSG00000253729.7  | ENSP00000345182.4 | 16.3 | 12291 |
| VYTPVLEHL   | 9  | 0.0038  | PRKDC   | ENSG00000253729.7  | ENSP00000345182.4 | 16.3 | 12291 |
| RYQRLYVKF   | 9  | 0.0045  | PRR12   | ENSG00000126464.14 | ENSP00000394510.1 | 12.5 | 6108  |

|             |    |         |         |                    |                   |       |      |
|-------------|----|---------|---------|--------------------|-------------------|-------|------|
| AYTPFHAVL   | 9  | 0.0646  | INTS14  | ENSG00000138614.15 | ENSP00000326379.2 | 19.1  | 1554 |
| IYAGGIKSI   | 9  | 0.0969  | SLC12A4 | ENSG00000124067.17 | ENSP00000395983.2 | 27.3  | 3261 |
| SYLTSASSL   | 9  | 0.1760  | UBR5    | ENSG00000104517.13 | ENSP00000429084.1 | 24.6  | 8397 |
| VYSQIPAAVKL | 11 | 0.1193  | UBR5    | ENSG00000104517.13 | ENSP00000429084.1 | 24.6  | 8397 |
| TYLTNHLRL   | 9  | 0.0482  | ZNF697  | ENSG00000143067.5  | ENSP00000396857.2 | 11.3  | 1635 |
| RYLSKATTL   | 9  | 0.0202  | CDC16   | ENSG00000130177.16 | ENSP00000252458.6 | 58.0  | 1425 |
| PYHPPHVF    | 9  | 0.0090  | FOXN3   | ENSG00000053254.15 | ENSP00000343288.4 | 21.1  | 1470 |
| STVGGWVSTR  | 10 | 27.4000 | AGPS    | ENSG00000018510.15 | ENSP00000264167.4 | 11.8  | 1974 |
| TYKDTHRKF   | 9  | 0.0762  | IFT88   | ENSG00000032742.17 | ENSP00000261632.5 | 24.3  | 2472 |
| RYTPEQDTMTF | 11 | 0.0105  | RARA    | ENSG00000131759.18 | ENSP00000377648.3 | 24.4  | 1434 |
| LYQDGVFKF   | 9  | 0.0022  | AKTIP   | ENSG00000166971.17 | ENSP00000454771.1 | 29.5  | 381  |
| RYAVEILTW   | 9  | 0.0128  | UBR2    | ENSG00000024048.10 | ENSP00000361992.1 | 14.5  | 5265 |
| RYGDGGSTF   | 9  | 0.0128  | HNRNPH1 | ENSG00000169045.17 | ENSP00000327539.6 | 139.4 | 1416 |
| YQFNVKTV    | 8  | 9.1772  | PTPRB   | ENSG00000127329.15 | ENSP00000438927.1 | 31.0  | 5721 |
| KYMATVTSI   | 9  | 0.0393  | PTPRB   | ENSG00000127329.15 | ENSP00000438927.1 | 31.0  | 5721 |
| VYMNRVKEI   | 9  | 0.0801  | C1D     | ENSG00000197223.11 | ENSP00000386468.3 | 23.6  | 423  |
| VYHILKVLF   | 9  | 0.0118  | ELP1    | ENSG00000070061.15 | ENSP00000363779.5 | 17.7  | 3996 |
| SQALILKI    | 8  | 9.8147  | NUP188  | ENSG00000095319.14 | ENSP00000361658.2 | 13.6  | 5247 |
| NYSNIRFQF   | 9  | 0.0096  | MTMR6   | ENSG00000139505.11 | ENSP00000371221.5 | 11.1  | 1863 |
| RYSEYAEEF   | 9  | 0.0054  | MTMR6   | ENSG00000139505.11 | ENSP00000371221.5 | 11.1  | 1863 |
| AYSRVQYQF   | 9  | 0.0024  | BCAR3   | ENSG00000137936.18 | ENSP00000260502.6 | 30.4  | 2475 |
| KYAQWEESL   | 9  | 0.1067  | CRNKL1  | ENSG00000101343.14 | ENSP00000440733.1 | 12.2  | 2061 |
| RFEKHAYF    | 9  | 0.1403  | CRNKL1  | ENSG00000101343.14 | ENSP00000440733.1 | 12.2  | 2061 |
| HYIERIQKL   | 9  | 0.0099  | KANK1   | ENSG00000107104.18 | ENSP00000371740.1 | 56.2  | 4056 |
| SYPDNFLHI   | 9  | 0.0090  | ATG5    | ENSG00000057663.16 | ENSP00000343313.3 | 17.4  | 825  |
| LYDIVFKHF   | 9  | 0.0202  | SP100   | ENSG00000067066.17 | ENSP00000386427.1 | 48.1  | 2064 |
| VYVDLGGSHVF | 11 | 0.0196  | BMS1    | ENSG00000165733.8  | ENSP00000363642.4 | 10.9  | 3846 |

|              |    |         |                 |                    |                   |       |       |
|--------------|----|---------|-----------------|--------------------|-------------------|-------|-------|
| VYPSSLSKI    | 9  | 0.0257  | CAND1           | ENSG00000111530.13 | ENSP00000442318.1 | 14.1  | 3690  |
| YATHPFKF     | 8  | 0.3811  | NCOA7           | ENSG00000111912.20 | ENSP00000357341.3 | 116.8 | 2826  |
| AYATHPFKF    | 9  | 0.0033  | NCOA7           | ENSG00000111912.20 | ENSP00000357341.3 | 116.8 | 2826  |
| ETASAVATR    | 9  | 21.3636 | NCOA7           | ENSG00000111912.20 | ENSP00000357341.3 | 116.8 | 2826  |
| TYIDTRTVF    | 9  | 0.0198  | CAPN6           | ENSG00000077274.9  | ENSP00000317214.1 | 10.8  | 1923  |
| GYIESVQHI    | 9  | 0.0253  | MGME1           | ENSG00000125871.14 | ENSP00000366939.5 | 12.0  | 1032  |
| VYYPVRHHL    | 9  | 0.0050  | TRRAP           | ENSG00000196367.13 | ENSP00000403708.3 | 16.4  | 11544 |
| RYFENPQVI    | 9  | 0.0138  | TRRAP           | ENSG00000196367.13 | ENSP00000403708.3 | 16.4  | 11544 |
| EVSLLLLDR    | 9  | 43.0000 | ANKHD1-EIF4EBP3 | ENSG00000254996.5  | ENSP00000432016.1 | 28.6  | 7851  |
| EVYDGPKNVR   | 10 | 11.4293 | PCM1            | ENSG00000078674.17 | ENSP00000429054.1 | 34.2  | 2292  |
| EQIDKKLER    | 9  | 15.9275 | PTPN12          | ENSG00000127947.16 | ENSP00000248594.6 | 26.8  | 2340  |
| IYNKIKQII    | 9  | 0.0481  | DLG3            | ENSG00000082458.12 | ENSP00000441393.1 | 22.3  | 1098  |
| SYGDILHVI    | 9  | 0.0092  | DLG3            | ENSG00000082458.12 | ENSP00000441393.1 | 22.3  | 1098  |
| RFLNDPGHLLW  | 11 | 0.1454  | RPP21           | ENSG00000241370.5  | ENSP00000394320.2 | 26.1  | 531   |
| RYLELISSI    | 9  | 0.0205  | IFT122          | ENSG00000163913.11 | ENSP00000324005.3 | 25.8  | 3723  |
| TMLGKFYHF    | 9  | 0.0873  | IFT122          | ENSG00000163913.11 | ENSP00000324005.3 | 25.8  | 3723  |
| SYNPITHQL    | 9  | 0.0025  | IFT122          | ENSG00000163913.11 | ENSP00000324005.3 | 25.8  | 3723  |
| RYIEFHSQSGF  | 11 | 0.0514  | NOL10           | ENSG00000115761.16 | ENSP00000371101.5 | 12.1  | 2064  |
| RYLEAGAAGLRW | 12 | 0.2881  | HSPBP1          | ENSG00000133265.11 | ENSP00000398244.1 | 28.2  | 1077  |
| RYFKGPELL    | 9  | 0.0100  | CSNK2A2         | ENSG00000070770.9  | ENSP00000262506.3 | 39.3  | 1050  |
| EVVDVSTMHR   | 10 | 25.8333 | HERC1           | ENSG00000103657.14 | ENSP00000390158.2 | 17.6  | 14583 |
| EYNSALPLL    | 9  | 0.1042  | GTF3C3          | ENSG00000119041.11 | ENSP00000263956.3 | 14.2  | 2658  |
| YYLQGGFNKF   | 10 | 0.0064  | DUSP7           | ENSG00000164086.10 | ENSP00000417183.1 | 10.9  | 1257  |
| NYQNVVHKL    | 9  | 0.0081  | ZMYM4           | ENSG00000146463.11 | ENSP00000322915.6 | 12.5  | 4644  |
| EIYSGCTKR    | 9  | 28.1250 | DNAJB4          | ENSG00000162616.9  | ENSP00000359799.5 | 23.0  | 1011  |
| TYGIKHKMF    | 9  | 0.0173  | PIGK            | ENSG00000142892.15 | ENSP00000388854.1 | 17.6  | 903   |
| GYCPNHPEVI   | 9  | 0.3044  | NEDD4L          | ENSG00000049759.18 | ENSP00000411947.1 | 78.6  | 2562  |

|            |    |         |           |                    |                   |       |      |
|------------|----|---------|-----------|--------------------|-------------------|-------|------|
| SYINELRTF  | 9  | 0.0040  | SPG11     | ENSG00000104133.15 | ENSP00000445278.2 | 28.3  | 6990 |
| SYASLQQNKW | 10 | 0.1314  | SPG11     | ENSG00000104133.15 | ENSP00000445278.2 | 28.3  | 6990 |
| VYNNSRMLHF | 10 | 0.0568  | ATXN2L    | ENSG00000168488.18 | ENSP00000457613.1 | 32.9  | 3204 |
| TYDYNFHSF  | 9  | 0.0054  | ASH1L     | ENSG00000116539.13 | ENSP00000357330.3 | 14.0  | 8907 |
| EVIGMVTRA  | 9  | 43.0000 | NR1D2     | ENSG00000174738.13 | ENSP00000310006.3 | 11.2  | 1737 |
| ETAFGYKGL  | 9  | 15.4783 | HAT1      | ENSG00000128708.13 | ENSP00000264108.4 | 27.4  | 1257 |
| EYGVIRDVL  | 9  | 0.8919  | H6PD      | ENSG00000049239.12 | ENSP00000366620.1 | 10.9  | 2373 |
| VYVKHNISF  | 9  | 0.0059  | AP3M2     | ENSG00000070718.12 | ENSP00000428787.1 | 12.7  | 1254 |
| AQRLMQLI   | 8  | 19.2581 | MED12     | ENSG00000184634.16 | ENSP00000363193.3 | 14.7  | 6531 |
| GYSSRFGLF  | 9  | 0.1254  | GBA3      | ENSG00000249948.6  | ENSP00000480447.1 | 161.5 | 483  |
| IYVHDLTLF  | 9  | 0.0061  | VPS39     | ENSG00000166887.15 | ENSP00000326534.5 | 48.8  | 2625 |
| IYLDTHFRL  | 9  | 0.0074  | ZNFX1     | ENSG00000124201.15 | ENSP00000379412.1 | 15.2  | 5754 |
| HQKSILTQI  | 9  | 2.4012  | KIDINS220 | ENSG00000134313.15 | ENSP00000418974.1 | 23.5  | 5256 |
| KYGTTPLVW  | 9  | 0.0472  | KIDINS220 | ENSG00000134313.15 | ENSP00000418974.1 | 23.5  | 5256 |
| SYSSIASEF  | 9  | 0.0066  | TMX3      | ENSG00000166479.10 | ENSP00000299608.2 | 16.6  | 1362 |
| VYDPLFSQL  | 9  | 0.0201  | SRRD      | ENSG00000100104.13 | ENSP00000215917.6 | 10.7  | 1017 |
| RYIADHSYF  | 9  | 0.0082  | FAM160A2  | ENSG00000051009.10 | ENSP00000431773.1 | 57.2  | 2514 |
| NYIMKIHNF  | 9  | 0.0043  | ADNP      | ENSG00000101126.17 | ENSP00000495540.1 | 12.5  | 2622 |
| NYNRAFQVW  | 9  | 0.0636  | SLC44A3   | ENSG00000143036.17 | ENSP00000431836.1 | 29.6  | 1860 |
| TVISRVIGR  | 9  | 15.8406 | ANKRD17   | ENSG00000132466.18 | ENSP00000427151.2 | 26.4  | 7470 |
| KYQRILERL  | 9  | 0.0301  | OPA1      | ENSG00000198836.10 | ENSP00000494273.1 | 21.4  | 1707 |
| VYCARFVEL  | 9  | 0.1363  | THOC2     | ENSG00000125676.20 | ENSP00000245838.8 | 19.0  | 4779 |
| EVISKTPTL  | 9  | 2.3082  | CREBRF    | ENSG00000164463.12 | ENSP00000296953.2 | 11.0  | 1917 |
| EYIKFLRSI  | 9  | 0.1105  | HDAC2     | ENSG00000196591.12 | ENSP00000357621.2 | 25.4  | 1374 |
| KYADKIYSI  | 9  | 0.0033  | FOLH1     | ENSG00000086205.18 | ENSP00000431463.1 | 23.2  | 2112 |
| YYLTDIDRI  | 9  | 0.1415  | GNA14     | ENSG00000156049.7  | ENSP00000365807.4 | 10.1  | 1065 |
| TYAORTQLF  | 9  | 0.0047  | MKLN1     | ENSG00000128585.18 | ENSP00000323527.6 | 16.5  | 2205 |

|            |    |         |        |                    |                   |      |      |
|------------|----|---------|--------|--------------------|-------------------|------|------|
| LQPERYELW  | 9  | 0.2782  | KDM4B  | ENSG00000127663.15 | ENSP00000440495.1 | 14.9 | 3390 |
| VYNTATNQWF | 10 | 0.0599  | HCFC1  | ENSG00000172534.14 | ENSP00000359001.4 | 15.6 | 6240 |
| SFIKVSHV   | 8  | 5.0112  | INPP5K | ENSG00000132376.20 | ENSP00000318476.6 | 25.3 | 1116 |
| PYQSQIAVF  | 9  | 0.0263  | RAD17  | ENSG00000152942.19 | ENSP00000482775.1 | 18.3 | 2010 |
| HAYIIAKV   | 8  | 32.6000 | PTPRC  | ENSG00000081237.20 | ENSP00000306782.7 | 14.1 | 3435 |
| TYTLRVFEL  | 9  | 0.0961  | PTPRC  | ENSG00000081237.20 | ENSP00000306782.7 | 14.1 | 3435 |
| AYVGDQLTL  | 9  | 0.0679  | ASB1   | ENSG00000065802.12 | ENSP00000264607.4 | 11.0 | 1005 |
| DYMKTTSNF  | 9  | 0.0203  | NEMF   | ENSG00000165525.18 | ENSP00000298310.5 | 15.2 | 3228 |
| QQFKILNV   | 8  | 15.6812 | UPF2   | ENSG00000151461.20 | ENSP00000380244.2 | 13.3 | 3816 |
| RYVWWKKSLL | 9  | 0.2932  | UPF2   | ENSG00000151461.20 | ENSP00000380244.2 | 13.3 | 3816 |
| DLIFKTGGR  | 9  | 33.7500 | UPF2   | ENSG00000151461.20 | ENSP00000380244.2 | 13.3 | 3816 |
| ILGPPPPSF  | 9  | 0.1364  | MATR3  | ENSG00000015479.18 | ENSP00000482895.1 | 42.0 | 2541 |
| GYIERPQLI  | 9  | 0.0382  | TENT2  | ENSG00000164329.13 | ENSP00000421966.1 | 18.2 | 1323 |
| EVVGIIESR  | 9  | 24.0000 | NUP160 | ENSG00000030066.13 | ENSP00000367721.2 | 17.6 | 4308 |
| EVADRLFSSF | 10 | 4.4254  | TAPT1  | ENSG00000169762.17 | ENSP00000385347.2 | 15.5 | 1701 |
| RYCFQITSF  | 9  | 0.0336  | APPL1  | ENSG00000157500.12 | ENSP00000288266.3 | 23.5 | 2127 |
| DIISQQLVER | 10 | 49.0000 | MPV17  | ENSG00000115204.15 | ENSP00000385175.1 | 62.6 | 339  |
| EIISKLQGR  | 9  | 20.0000 | PHKA2  | ENSG00000044446.11 | ENSP00000369274.4 | 30.0 | 3705 |
| RYKFHNSRW  | 9  | 0.2913  | TBX3   | ENSG00000135111.16 | ENSP00000257567.2 | 11.2 | 2169 |
| RYFPVFEKI  | 9  | 0.0037  | GSTA4  | ENSG00000170899.11 | ENSP00000360002.4 | 24.9 | 666  |
| SYLNTVERW  | 9  | 0.0099  | KLHL5  | ENSG00000109790.16 | ENSP00000425512.1 | 24.0 | 846  |
| ALPSKLPF   | 9  | 0.0710  | TRIM25 | ENSG00000121060.18 | ENSP00000323889.4 | 18.3 | 1890 |
| EYTRALFLL  | 9  | 0.1123  | MAU2   | ENSG00000129933.21 | ENSP00000262815.9 | 19.2 | 1839 |
| KYYDKKYQVF | 10 | 0.0196  | FGGY   | ENSG00000172456.17 | ENSP00000360262.4 | 38.6 | 1725 |
| VYVERAEVL  | 9  | 0.0898  | BRAP   | ENSG00000089234.16 | ENSP00000403524.3 | 9.8  | 1776 |
| KYQEYTNEL  | 9  | 0.0277  | TBK1   | ENSG00000183735.10 | ENSP00000498885.1 | 12.9 | 2031 |
| EYTDVLLQKI | 9  | 0.0705  | EPS8L1 | ENSG00000131037.15 | ENSP00000437541.1 | 33.7 | 1977 |

|              |    |         |          |                    |                   |      |      |
|--------------|----|---------|----------|--------------------|-------------------|------|------|
| VYIPMSPGAHFF | 12 | 0.0076  | GAB2     | ENSG00000033327.13 | ENSP00000354952.4 | 9.7  | 2028 |
| RYPQSIFFSTF  | 10 | 0.0036  | SBF2     | ENSG00000133812.15 | ENSP00000256190.8 | 21.7 | 5547 |
| QYTPHSHQF    | 9  | 0.0027  | RPTOR    | ENSG00000141564.15 | ENSP00000307272.3 | 11.7 | 4005 |
| KYGSVIQLL    | 9  | 0.0052  | ITPR3    | ENSG00000096433.11 | ENSP00000475177.1 | 9.5  | 8013 |
| AYLEALSHL    | 9  | 0.0271  | PIK3CD   | ENSG00000171608.15 | ENSP00000366563.4 | 11.5 | 3132 |
| YYQSSVQYL    | 9  | 0.0083  | DNAAF5   | ENSG00000164818.16 | ENSP00000297440.6 | 22.3 | 2565 |
| KYHTHLLQF    | 9  | 0.0065  | ABCD1    | ENSG00000101986.12 | ENSP00000218104.3 | 9.6  | 2235 |
| EYVRVSEHF    | 9  | 0.0132  | ZC3HAV1  | ENSG00000105939.13 | ENSP00000242351.5 | 11.6 | 2706 |
| NSALVLKV     | 8  | 27.7000 | RB1      | ENSG00000139687.15 | ENSP00000267163.4 | 13.3 | 2784 |
| QYVVDLTSE    | 9  | 0.0385  | NTPCR    | ENSG00000135778.12 | ENSP00000355587.4 | 21.0 | 570  |
| EVIDFSHGL    | 9  | 5.1162  | ABHD17C  | ENSG00000136379.12 | ENSP00000258884.4 | 11.9 | 987  |
| KYSDVSGLL    | 9  | 0.1292  | INO80C   | ENSG00000153391.15 | ENSP00000391457.1 | 24.4 | 684  |
| RYFDHALTL    | 9  | 0.0072  | FAM91A1  | ENSG00000176853.16 | ENSP00000429491.1 | 17.8 | 2367 |
| TYHGVFVNI    | 9  | 0.0410  | VPS26C   | ENSG00000157538.14 | ENSP00000311399.6 | 22.9 | 891  |
| AQYKFIYV     | 8  | 13.0631 | PTPN6    | ENSG00000111679.17 | ENSP00000326010.9 | 44.5 | 1785 |
| RYTVGGLETF   | 10 | 0.0291  | PTPN6    | ENSG00000111679.17 | ENSP00000326010.9 | 44.5 | 1785 |
| KYMEDYHQF    | 9  | 0.0005  | PPL      | ENSG00000118898.16 | ENSP00000340510.2 | 12.3 | 5268 |
| NYKDLNGNVF   | 10 | 0.2590  | SSR1     | ENSG00000124783.14 | ENSP00000244763.4 | 11.7 | 858  |
| IYPMKNHMF    | 9  | 0.0089  | RALGAPA2 | ENSG00000188559.15 | ENSP00000202677.6 | 13.6 | 5619 |
| EVIFHVSTR    | 9  | 23.2500 | RALGAPA2 | ENSG00000188559.15 | ENSP00000202677.6 | 13.6 | 5619 |
| KYADAVKNF    | 9  | 0.0051  | RASA3    | ENSG00000185989.11 | ENSP00000335029.7 | 9.1  | 2502 |
| AYGFVARI     | 8  | 1.8018  | VWF      | ENSG00000110799.13 | ENSP00000261405.5 | 9.6  | 8439 |
| EVIASYAHL    | 9  | 5.6274  | VWF      | ENSG00000110799.13 | ENSP00000261405.5 | 9.6  | 8439 |
| HQEVLREI     | 8  | 18.5000 | TAP2     | ENSG00000204267.15 | ENSP00000498827.1 | 18.8 | 1959 |
| TYGERFCYL    | 9  | 0.1785  | DPY19L4  | ENSG00000156162.16 | ENSP00000389630.2 | 10.5 | 2169 |
| NYSPLYVNYF   | 9  | 0.0028  | DPY19L4  | ENSG00000156162.16 | ENSP00000389630.2 | 10.5 | 2169 |
| VYQHLFTRI    | 9  | 0.0176  | AP5Z1    | ENSG00000242802.9  | ENSP00000497395.1 | 16.6 | 1464 |

|            |    |         |         |                    |                   |      |      |
|------------|----|---------|---------|--------------------|-------------------|------|------|
| VYAKLLHRY  | 9  | 0.1186  | FBXO31  | ENSG00000103264.18 | ENSP00000310841.4 | 12.2 | 1617 |
| LYSRVQATF  | 9  | 0.0045  | FBXO31  | ENSG00000103264.18 | ENSP00000310841.4 | 12.2 | 1617 |
| ETMGRALRY  | 9  | 10.0038 | ELF1    | ENSG00000120690.16 | ENSP00000239882.3 | 21.7 | 1857 |
| SYLEKQVVTF | 10 | 0.0074  | TTC27   | ENSG00000018699.13 | ENSP00000313953.4 | 9.2  | 2529 |
| EYIAKQFGF  | 9  | 0.0500  | ITPR1   | ENSG00000150995.19 | ENSP00000349597.4 | 64.0 | 8130 |
| VYPVITARL  | 9  | 0.0206  | ZNF106  | ENSG00000103994.17 | ENSP00000263805.4 | 15.8 | 5649 |
| AYGSLFNNTI | 9  | 0.0435  | KYAT3   | ENSG00000137944.18 | ENSP00000359522.3 | 21.6 | 1260 |
| RYIFAKNLF  | 9  | 0.0116  | DGUOK   | ENSG00000114956.20 | ENSP00000264093.4 | 32.6 | 831  |
| VYPGDPLRF  | 9  | 0.0068  | TSEN34  | ENSG00000170892.12 | ENSP00000379667.1 | 30.4 | 930  |
| SYLEKVVTL  | 9  | 0.0043  | ABI3    | ENSG00000108798.9  | ENSP00000225941.1 | 11.5 | 1098 |
| TQVLIKLI   | 8  | 19.6452 | COPS2   | ENSG00000166200.15 | ENSP00000373553.5 | 16.0 | 1329 |
| KYLVLANML  | 9  | 0.1245  | COPS2   | ENSG00000166200.15 | ENSP00000373553.5 | 16.0 | 1329 |
| GQFLVRII   | 8  | 22.9474 | GUCY1B1 | ENSG00000061918.13 | ENSP00000420842.1 | 16.4 | 1758 |
| EVVTGVIGQR | 10 | 45.5000 | GUCY1B1 | ENSG00000061918.13 | ENSP00000420842.1 | 16.4 | 1758 |
| VYSIVPQSW  | 9  | 0.0078  | LARP4   | ENSG00000161813.22 | ENSP00000293618.8 | 19.9 | 1959 |
| TYNPAFSRL  | 9  | 0.0144  | TMEM181 | ENSG00000146433.8  | ENSP00000356057.3 | 8.8  | 1836 |
| EAIGIISKM  | 9  | 7.1005  | NCAPD2  | ENSG00000010292.13 | ENSP00000325017.5 | 15.6 | 4203 |
| VYTGDIDHHW | 9  | 0.0124  | DCAF13  | ENSG00000164934.14 | ENSP00000484962.1 | 17.8 | 1335 |
| LYLLNNTTKL | 9  | 0.0714  | MLH1    | ENSG00000076242.14 | ENSP00000398272.2 | 19.2 | 1545 |
| IWISKLPHF  | 9  | 0.0086  | TDRD7   | ENSG00000196116.8  | ENSP00000347444.4 | 9.1  | 3294 |
| LFIATSQKF  | 9  | 0.0541  | NCAPH2  | ENSG00000025770.19 | ENSP00000410088.2 | 24.3 | 1815 |
| EYVEKFYRI  | 9  | 0.0259  | RAD50   | ENSG00000113522.14 | ENSP00000368100.4 | 12.5 | 3936 |
| RYIKALETL  | 9  | 0.0088  | RAD50   | ENSG00000113522.14 | ENSP00000368100.4 | 12.5 | 3936 |
| VYSQFITQL  | 9  | 0.0094  | RAD50   | ENSG00000113522.14 | ENSP00000368100.4 | 12.5 | 3936 |
| TYTDKLFKF  | 9  | 0.0025  | CRTAC1  | ENSG00000095713.14 | ENSP00000359629.3 | 9.8  | 1983 |
| RYQEVDRRF  | 9  | 0.0112  | YTHDC1  | ENSG00000083896.12 | ENSP00000347888.3 | 51.3 | 2127 |
| IYAPPLPSL  | 9  | 0.0054  | AKAP1   | ENSG00000121057.13 | ENSP00000478212.1 | 25.0 | 2709 |

|             |    |         |          |                    |                   |       |      |
|-------------|----|---------|----------|--------------------|-------------------|-------|------|
| TYRNVMEQF   | 9  | 0.0218  | BAIAP2L1 | ENSG00000006453.14 | ENSP00000005260.8 | 8.8   | 1533 |
| IYLLIHNNF   | 9  | 0.0094  | CD53     | ENSG00000143119.14 | ENSP00000497382.1 | 13.5  | 657  |
| IYTNLNQKI   | 9  | 0.0304  | EXOC6B   | ENSG00000144036.15 | ENSP00000272427.6 | 9.5   | 2433 |
| VYNQIKEFI   | 9  | 0.0505  | EXOC6B   | ENSG00000144036.15 | ENSP00000272427.6 | 9.5   | 2433 |
| SVYDGEEHGR  | 10 | 12.8750 | EXOC6B   | ENSG00000144036.15 | ENSP00000272427.6 | 9.5   | 2433 |
| RFVMKAHSF   | 9  | 0.1245  | SOAT1    | ENSG00000057252.13 | ENSP00000356591.3 | 9.1   | 1650 |
| TYTSNLVRL   | 9  | 0.0535  | DNAJC16  | ENSG00000116138.13 | ENSP00000480224.1 | 10.7  | 1410 |
| EVWPHSTER   | 9  | 13.3694 | LYSMD1   | ENSG00000163155.12 | ENSP00000357904.5 | 8.8   | 681  |
| KYGRDFQAI   | 9  | 0.1605  | RCOR1    | ENSG00000089902.10 | ENSP00000262241.5 | 9.4   | 1455 |
| VYPPIRHHL   | 9  | 0.0075  | VPS37A   | ENSG00000155975.10 | ENSP00000318629.4 | 11.2  | 1191 |
| KYKSAFNKL   | 9  | 0.0281  | DENND4B  | ENSG00000198837.10 | ENSP00000354597.4 | 24.9  | 4488 |
| TYVRWYTQL   | 9  | 0.0521  | CLCC1    | ENSG00000121940.15 | ENSP00000358987.3 | 11.5  | 1503 |
| VFIGTGHELL  | 9  | 0.1314  | LRRK2    | ENSG00000188906.16 | ENSP00000341930.2 | 23.4  | 3813 |
| NYIGLINRI   | 9  | 0.0555  | EIF2AK2  | ENSG00000055332.18 | ENSP00000233057.4 | 10.1  | 1653 |
| RFKNKAYLL   | 9  | 0.2653  | DICER1   | ENSG00000100697.14 | ENSP00000376783.1 | 10.8  | 5766 |
| VYQNHVQHL   | 9  | 0.0069  | ARHGAP5  | ENSG00000100852.13 | ENSP00000371897.1 | 25.4  | 4506 |
| SYTHIQYLF   | 9  | 0.0022  | SH2D3C   | ENSG00000095370.20 | ENSP00000485866.1 | 11.1  | 2100 |
| VYTTTRSHL   | 9  | 0.2157  | CLPTM1L  | ENSG00000049656.14 | ENSP00000313854.5 | 133.4 | 1614 |
| LYGRHFNYL   | 9  | 0.1117  | TENT4B   | ENSG00000121274.12 | ENSP00000455837.1 | 9.2   | 1764 |
| RYPVGRFPSL  | 10 | 0.1852  | FEM1A    | ENSG00000141965.4  | ENSP00000269856.3 | 8.2   | 2007 |
| YYLNDLDRI   | 9  | 0.1787  | GNAI1    | ENSG00000127955.17 | ENSP00000498091.1 | 45.7  | 1062 |
| ASPTVCFLKER | 11 | 31.3333 | GC       | ENSG00000145321.13 | ENSP00000273951.8 | 32.7  | 1422 |
| KYVSGEFRF   | 9  | 0.0074  | RIOK1    | ENSG00000124784.9  | ENSP00000369162.2 | 8.6   | 1704 |
| AYLSKAMEI   | 9  | 0.0860  | RIOK1    | ENSG00000124784.9  | ENSP00000369162.2 | 8.6   | 1704 |
| RYSPLVLSRF  | 9  | 0.0012  | COG1     | ENSG00000166685.12 | ENSP00000299886.4 | 26.2  | 2940 |
| RYNPRTNQW   | 9  | 0.0172  | KLHL20   | ENSG00000076321.11 | ENSP00000209884.4 | 9.9   | 1827 |
| RYDPKTNQW   | 9  | 0.0114  | KLHL20   | ENSG00000076321.11 | ENSP00000209884.4 | 9.9   | 1827 |

|             |    |         |         |                    |                   |      |      |
|-------------|----|---------|---------|--------------------|-------------------|------|------|
| RYGLVTNEI   | 9  | 0.1078  | IFIH1   | ENSG00000115267.8  | ENSP00000497271.1 | 11.5 | 3075 |
| VYNNIMRHYL  | 10 | 0.2372  | IFIH1   | ENSG00000115267.8  | ENSP00000497271.1 | 11.5 | 3075 |
| EVAEHVQYM   | 9  | 5.5985  | GMNN    | ENSG00000112312.10 | ENSP00000230056.3 | 11.6 | 627  |
| IYAHITKHY   | 9  | 0.2827  | FOXK1   | ENSG00000164916.11 | ENSP00000328720.4 | 9.2  | 2199 |
| RYGPIVDVI   | 9  | 0.1877  | SRSF10  | ENSG00000188529.14 | ENSP00000344149.4 | 34.3 | 783  |
| EIFPPGGIRGR | 10 | 18.0526 | SLC2A12 | ENSG00000146411.5  | ENSP00000275230.5 | 8.0  | 1851 |
| RYFDRAALF   | 9  | 0.0038  | WDR11   | ENSG00000120008.16 | ENSP00000263461.5 | 48.1 | 3672 |
| SYPSAFSKL   | 9  | 0.0211  | MARF1   | ENSG00000166783.22 | ENSP00000450309.1 | 37.8 | 5226 |
| TYLEKFQNL   | 9  | 0.0057  | CLUAP1  | ENSG00000103351.13 | ENSP00000460889.1 | 26.0 | 741  |
| EVIDVVRTM   | 9  | 3.9045  | TAF1    | ENSG00000147133.15 | ENSP00000276072.3 | 14.3 | 5679 |
| SYQRAFNEF   | 9  | 0.0054  | TNFAIP2 | ENSG00000185215.9  | ENSP00000452634.1 | 38.7 | 1962 |
| DYDSVFHHL   | 9  | 0.0811  | EPC1    | ENSG00000120616.16 | ENSP00000318559.6 | 12.8 | 2439 |
| SYIDLLQRF   | 9  | 0.0013  | WDR24   | ENSG00000127580.17 | ENSP00000293883.4 | 8.6  | 2370 |
| KYPNMFKKI   | 9  | 0.0449  | AHCYL2  | ENSG00000158467.16 | ENSP00000413639.2 | 19.5 | 1830 |
| KYPENDLFRKL | 11 | 0.2237  | KDM5A   | ENSG00000073614.12 | ENSP00000382688.2 | 9.7  | 5070 |
| SFKQRSDLF   | 9  | 0.2681  | ZNF394  | ENSG00000160908.15 | ENSP00000337363.6 | 11.9 | 1683 |
| SFYKIRTI    | 8  | 1.6850  | NEK9    | ENSG00000119638.13 | ENSP00000238616.5 | 29.8 | 2937 |
| QYNPHVHQL   | 9  | 0.0061  | DLG5    | ENSG00000151208.17 | ENSP00000361467.2 | 11.2 | 5757 |
| VYVDKVEKM   | 9  | 0.0346  | AMOT    | ENSG00000126016.15 | ENSP00000305557.1 | 14.3 | 2025 |
| KYLEENVMRHF | 11 | 0.0369  | AMOT    | ENSG00000126016.15 | ENSP00000305557.1 | 14.3 | 2025 |
| HWTKVSHKF   | 9  | 0.0250  | PDE2A   | ENSG00000186642.16 | ENSP00000365633.3 | 21.3 | 2055 |
| KYVKGLISI   | 9  | 0.0479  | WDR35   | ENSG00000118965.14 | ENSP00000281405.4 | 9.5  | 3510 |
| KYGALVNNF   | 9  | 0.0052  | NSUN4   | ENSG00000117481.10 | ENSP00000471937.1 | 13.8 | 453  |
| KYADLSHNRL  | 10 | 0.1365  | RARS    | ENSG00000113643.9  | ENSP00000231572.3 | 27.5 | 1980 |
| RYSLVHQRL   | 9  | 0.0179  | FYCO1   | ENSG00000163820.15 | ENSP00000441178.1 | 14.8 | 4494 |
| VYIHHFDSI   | 9  | 0.0278  | MOB3C   | ENSG00000142961.14 | ENSP00000361008.2 | 10.2 | 648  |
| DVIGNEILRR  | 10 | 48.0000 | CLIP3   | ENSG00000105270.15 | ENSP00000353732.3 | 8.0  | 1641 |

|            |    |         |          |                    |                   |      |      |
|------------|----|---------|----------|--------------------|-------------------|------|------|
| KYGIVQEF   | 8  | 0.0790  | SOGA1    | ENSG00000149639.15 | ENSP00000237536.4 | 8.1  | 4983 |
| KYGIVQEFF  | 9  | 0.0093  | SOGA1    | ENSG00000149639.15 | ENSP00000237536.4 | 8.1  | 4983 |
| KYSNMEQSLF | 10 | 0.0586  | AQR      | ENSG00000021776.11 | ENSP00000156471.5 | 9.2  | 4455 |
| HQIIVQNV   | 8  | 19.4194 | E4F1     | ENSG00000167967.16 | ENSP00000301727.4 | 13.9 | 2352 |
| TYMPHVHIL  | 9  | 0.0026  | FBXO38   | ENSG00000145868.16 | ENSP00000342023.5 | 17.0 | 3564 |
| QYFPKAPF   | 9  | 0.0029  | USP48    | ENSG00000090686.15 | ENSP00000363864.3 | 28.5 | 1563 |
| NYVPVNHFW  | 9  | 0.0101  | IFT140   | ENSG00000187535.14 | ENSP00000406012.2 | 22.5 | 4386 |
| EVSPPNLRGR | 10 | 26.7000 | SLC2A13  | ENSG00000151229.13 | ENSP00000280871.4 | 8.5  | 1944 |
| EYPKFLKRF  | 9  | 0.0262  | COL4A3BP | ENSG00000113163.16 | ENSP00000369862.5 | 16.1 | 1572 |
| VYQVLQEHL  | 9  | 0.0341  | BMP7     | ENSG00000101144.13 | ENSP00000379204.3 | 9.2  | 1293 |
| ESISEFILRR | 10 | 41.0000 | TARBP1   | ENSG00000059588.10 | ENSP00000040877.1 | 12.7 | 4863 |
| RYQKLIVQI  | 9  | 0.0102  | CHN2     | ENSG00000106069.22 | ENSP00000486515.1 | 14.4 | 996  |
| RYASIN AHL | 9  | 0.0369  | CSNK1A1  | ENSG00000113712.18 | ENSP00000499757.1 | 26.8 | 975  |
| KYITKSFNF  | 9  | 0.0024  | PARN     | ENSG00000140694.17 | ENSP00000498898.1 | 20.9 | 1338 |
| KYITKSFNFY | 10 | 0.5365  | PARN     | ENSG00000140694.17 | ENSP00000498898.1 | 20.9 | 1338 |
| VYFPDQHINF | 10 | 0.0037  | PARD3B   | ENSG00000116117.18 | ENSP00000482649.1 | 11.6 | 3090 |
| HYMPPPYASL | 10 | 0.0343  | RNF111   | ENSG00000157450.15 | ENSP00000453015.1 | 10.8 | 3009 |
| KQPEEYHYL  | 9  | 0.2733  | MYO9A    | ENSG00000066933.16 | ENSP00000348349.5 | 14.3 | 7644 |
| SYIEFPAVM  | 9  | 0.0901  | MYO9A    | ENSG00000066933.16 | ENSP00000348349.5 | 14.3 | 7644 |
| PYVNNVPHL  | 9  | 0.0854  | MARS     | ENSG00000166986.15 | ENSP00000446168.2 | 44.9 | 1638 |
| DYSSILQKF  | 9  | 0.0077  | FNBP1    | ENSG00000187239.17 | ENSP00000415602.2 | 20.4 | 1704 |
| KYIDQKFVL  | 9  | 0.0265  | PPP2R5C  | ENSG00000078304.19 | ENSP00000329009.5 | 46.3 | 1620 |
| IYPEVVHMF  | 9  | 0.0005  | PPP2R5C  | ENSG00000078304.19 | ENSP00000329009.5 | 46.3 | 1620 |
| QYLPSPELL  | 9  | 0.0066  | KCNJ5    | ENSG00000120457.12 | ENSP00000433295.1 | 7.5  | 1257 |
| AYGKDFHLI  | 9  | 0.0208  | MIER1    | ENSG00000198160.14 | ENSP00000347514.3 | 9.4  | 1536 |
| VMYRVIQV   | 8  | 13.3514 | USF1     | ENSG00000158773.14 | ENSP00000435005.1 | 56.6 | 651  |
| EVLQGGSQR  | 9  | 32.2000 | USF1     | ENSG00000158773.14 | ENSP00000435005.1 | 56.6 | 651  |

|            |    |         |          |                    |                   |      |       |
|------------|----|---------|----------|--------------------|-------------------|------|-------|
| TYLPTSPLL  | 9  | 0.0084  | NRDC     | ENSG00000078618.21 | ENSP00000262679.8 | 57.0 | 3453  |
| ETVGTGIMGR | 10 | 47.0000 | INPP5B   | ENSG00000204084.13 | ENSP00000362118.1 | 11.6 | 2247  |
| KYVKIFDNF  | 9  | 0.0045  | ZNF195   | ENSG00000005801.18 | ENSP00000435828.1 | 12.3 | 1830  |
| SAGLILHQRI | 10 | 26.2000 | ZKSCAN8  | ENSG00000198315.11 | ENSP00000332750.5 | 7.7  | 1734  |
| RYLEAALRL  | 9  | 0.0225  | P3H4     | ENSG00000141696.13 | ENSP00000377505.1 | 15.2 | 1311  |
| NYATRIVTL  | 9  | 0.0542  | BIRC6    | ENSG00000115760.14 | ENSP00000393596.2 | 27.0 | 14571 |
| TYGPSFPAF  | 9  | 0.0025  | RALGAPB  | ENSG00000170471.15 | ENSP00000262879.6 | 11.0 | 4482  |
| SYLPLAHMF  | 9  | 0.0009  | ACSL5    | ENSG00000197142.10 | ENSP00000346223.4 | 9.6  | 2049  |
| DIAQSQLKTR | 10 | 50.0000 | MED21    | ENSG00000152944.9  | ENSP00000282892.3 | 9.3  | 432   |
| SYSSTFHSL  | 9  | 0.0086  | NBPF19   | ENSG00000271383.7  | ENSP00000498781.1 | 10.9 | 11529 |
| KYIKDDFRF  | 9  | 0.0068  | RIOK3    | ENSG00000101782.15 | ENSP00000462548.1 | 25.0 | 1548  |
| TYQDIFRDF  | 9  | 0.0094  | ACAP2    | ENSG00000114331.14 | ENSP00000324287.6 | 8.7  | 2334  |
| SQLILQKL   | 8  | 8.2707  | TTC21B   | ENSG00000123607.15 | ENSP00000243344.7 | 11.2 | 3948  |
| RYDSVINRL  | 9  | 0.0451  | PCF11    | ENSG00000165494.11 | ENSP00000298281.4 | 29.8 | 4665  |
| IYMNLASHI  | 9  | 0.0349  | GATAD2B  | ENSG00000143614.10 | ENSP00000357644.4 | 11.0 | 1779  |
| LYAHTIAGF  | 9  | 0.0549  | CTDP1    | ENSG00000060069.16 | ENSP00000075430.7 | 16.2 | 2601  |
| IYQKYIARF  | 9  | 0.0022  | CASZ1    | ENSG00000130940.15 | ENSP00000366221.3 | 12.2 | 5277  |
| KYNQVNSHF  | 9  | 0.0065  | CASZ1    | ENSG00000130940.15 | ENSP00000366221.3 | 12.2 | 5277  |
| RYKQDVERF  | 9  | 0.0141  | SMC5     | ENSG00000198887.9  | ENSP00000354957.5 | 8.1  | 3303  |
| ENISQVKER  | 9  | 46.0000 | SMC5     | ENSG00000198887.9  | ENSP00000354957.5 | 8.1  | 3303  |
| EIIDKRER   | 9  | 23.3750 | SMC5     | ENSG00000198887.9  | ENSP00000354957.5 | 8.1  | 3303  |
| PYSEKMTVLF | 10 | 0.0749  | SMC5     | ENSG00000198887.9  | ENSP00000354957.5 | 8.1  | 3303  |
| IYNKVTPTF  | 9  | 0.0011  | SPRED1   | ENSG00000166068.13 | ENSP00000299084.4 | 8.0  | 1332  |
| VFMRWKEQF  | 9  | 0.0335  | GID4     | ENSG00000141034.9  | ENSP00000268719.4 | 7.2  | 900   |
| LYGRLQELF  | 9  | 0.0098  | KIAA1109 | ENSG00000138688.15 | ENSP00000264501.4 | 36.1 | 15015 |
| EYGFISQTL  | 9  | 0.0943  | TMCC3    | ENSG00000057704.13 | ENSP00000261226.4 | 8.7  | 1431  |
| RYLLFARQF  | 9  | 0.0237  | MCM6     | ENSG00000076003.5  | ENSP00000264156.2 | 6.9  | 2463  |

|             |    |         |         |                    |                   |      |      |
|-------------|----|---------|---------|--------------------|-------------------|------|------|
| EVTDYAIARR  | 10 | 49.0000 | MCM6    | ENSG00000076003.5  | ENSP00000264156.2 | 6.9  | 2463 |
| SYLENDVDF   | 9  | 0.0037  | CAMTA2  | ENSG00000108509.21 | ENSP00000370712.5 | 26.8 | 3591 |
| EIIQPKQR    | 9  | 28.1250 | RELA    | ENSG00000173039.19 | ENSP00000311508.9 | 39.1 | 1644 |
| YVNGTYRL    | 9  | 0.0241  | RNF145  | ENSG00000145860.11 | ENSP00000482720.1 | 9.4  | 1989 |
| RYSDSTFTF   | 9  | 0.0014  | PARP8   | ENSG00000151883.18 | ENSP00000422217.2 | 9.5  | 2562 |
| VYKTIMEQF   | 9  | 0.0045  | BAIAP2  | ENSG00000175866.15 | ENSP00000316338.6 | 42.4 | 1656 |
| KYSLIKGNF   | 9  | 0.0796  | S100A8  | ENSG00000143546.10 | ENSP00000357722.3 | 8.5  | 279  |
| AFIEKHWF    | 9  | 0.0057  | KAT14   | ENSG00000149474.13 | ENSP00000392318.2 | 24.1 | 2346 |
| RYLDVSILGKF | 11 | 0.0210  | METTL3  | ENSG00000165819.12 | ENSP00000298717.3 | 27.8 | 1740 |
| LYSEVDVHF   | 9  | 0.0052  | POGZ    | ENSG00000143442.22 | ENSP00000376484.1 | 21.5 | 4071 |
| RYQFLEEAF   | 9  | 0.0506  | TRIM33  | ENSG00000197323.12 | ENSP00000358556.2 | 15.9 | 3330 |
| VYAQKHQQL   | 9  | 0.0232  | TRIM33  | ENSG00000197323.12 | ENSP00000358556.2 | 15.9 | 3330 |
| KYQIINEEF   | 9  | 0.0066  | HPS3    | ENSG00000163755.8  | ENSP00000296051.2 | 24.0 | 3012 |
| KFQDAHFEF   | 9  | 0.0116  | DDX60   | ENSG00000137628.17 | ENSP00000377344.3 | 6.8  | 5136 |
| SYITKPEKW   | 9  | 0.0102  | MANEA   | ENSG00000172469.16 | ENSP00000351669.4 | 6.8  | 1386 |
| QYMERLQLL   | 9  | 0.0112  | MTX1    | ENSG00000173171.14 | ENSP00000476632.1 | 23.7 | 951  |
| NYVEVTRKW   | 9  | 0.0602  | MTX1    | ENSG00000173171.14 | ENSP00000476632.1 | 23.7 | 951  |
| IYCPAPPQI   | 9  | 0.0168  | CD55    | ENSG00000196352.15 | ENSP00000356030.2 | 20.0 | 1332 |
| QYQEAFAQKL  | 9  | 0.0083  | GEMIN5  | ENSG00000082516.9  | ENSP00000285873.6 | 6.7  | 4524 |
| SYARHFLDF   | 9  | 0.0206  | ZADH2   | ENSG00000180011.7  | ENSP00000323678.3 | 27.8 | 1131 |
| HYNSHYEKF   | 9  | 0.0073  | ASTN2   | ENSG00000148219.16 | ENSP00000363098.3 | 7.7  | 3186 |
| EYAKIHDLL   | 9  | 0.0843  | ZNF318  | ENSG00000171467.16 | ENSP00000475748.1 | 12.6 | 3351 |
| RYALIMHKL   | 9  | 0.0091  | ZBTB11  | ENSG00000066422.4  | ENSP00000326200.4 | 7.2  | 3159 |
| RYLEKNVKL   | 9  | 0.0248  | TGS1    | ENSG00000137574.10 | ENSP00000260129.5 | 7.1  | 2559 |
| VYQLRFQFL   | 9  | 0.0324  | POLR1A  | ENSG00000068654.16 | ENSP00000263857.6 | 8.2  | 5160 |
| IYPELQIERF  | 10 | 0.0069  | APBB1IP | ENSG00000077420.16 | ENSP00000365411.4 | 7.0  | 1998 |
| SYQKLLFKF   | 9  | 0.0027  | RB1CC1  | ENSG00000023287.13 | ENSP00000396067.2 | 13.7 | 4773 |

|             |    |         |          |                    |                   |      |      |
|-------------|----|---------|----------|--------------------|-------------------|------|------|
| RYINNPLLI   | 9  | 0.0196  | TLL5     | ENSG00000119685.20 | ENSP00000298832.9 | 10.3 | 3843 |
| IYQWRDEL    | 9  | 0.1508  | SATB1    | ENSG00000182568.17 | ENSP00000341024.5 | 9.5  | 2289 |
| KYIEGVSDF   | 9  | 0.0087  | IPP      | ENSG00000197429.10 | ENSP00000379739.3 | 8.6  | 1752 |
| VYDPLSKRW   | 9  | 0.0269  | IPP      | ENSG00000197429.10 | ENSP00000379739.3 | 8.6  | 1752 |
| RYACLVTLH   | 9  | 4.9154  | TENT5B   | ENSG00000158246.8  | ENSP00000289166.5 | 6.4  | 1275 |
| VFIKRCFTF   | 9  | 0.0554  | DOCK9    | ENSG00000088387.19 | ENSP00000413781.2 | 30.1 | 3762 |
| EYKTVHEEL   | 9  | 0.2091  | DOCK9    | ENSG00000088387.19 | ENSP00000413781.2 | 30.1 | 3762 |
| FYHKYFNYL   | 9  | 0.0550  | EXT2     | ENSG00000151348.14 | ENSP00000431173.1 | 9.7  | 2154 |
| TYDRVESLF   | 9  | 0.0432  | EXT2     | ENSG00000151348.14 | ENSP00000431173.1 | 9.7  | 2154 |
| DYAYLREHF   | 9  | 0.1404  | ZNF598   | ENSG00000167962.14 | ENSP00000455308.2 | 12.1 | 2712 |
| RYFKTPRKF   | 9  | 0.0066  | CIZ1     | ENSG00000148337.21 | ENSP00000398011.1 | 40.7 | 2460 |
| IYQDQILEKF  | 10 | 0.0214  | TUBE1    | ENSG00000074935.14 | ENSP00000357651.5 | 14.2 | 1425 |
| ESVGRVAER   | 10 | 53.7500 | LIMA1    | ENSG00000050405.13 | ENSP00000448779.1 | 19.8 | 1800 |
| AYLKDLQKL   | 9  | 0.0278  | SHOC2    | ENSG00000108061.11 | ENSP00000358464.4 | 8.4  | 1746 |
| SQYLTRITI   | 9  | 2.3817  | ANAPC1   | ENSG00000153107.13 | ENSP00000339109.3 | 8.3  | 5832 |
| EIFDKGRVR   | 9  | 27.3000 | MYOM2    | ENSG00000036448.10 | ENSP00000262113.4 | 18.8 | 4395 |
| YYMIGEQKF   | 9  | 0.0041  | NNMT     | ENSG00000166741.7  | ENSP00000299964.3 | 9.7  | 792  |
| DYLEKYYKF   | 9  | 0.0085  | NNMT     | ENSG00000166741.7  | ENSP00000299964.3 | 9.7  | 792  |
| YVEKVEKL    | 8  | 1.9464  | AMOTL1   | ENSG00000166025.18 | ENSP00000387739.2 | 9.2  | 2868 |
| AYVEKVEKL   | 9  | 0.0288  | AMOTL1   | ENSG00000166025.18 | ENSP00000387739.2 | 9.2  | 2868 |
| KYLEESTIRHF | 11 | 0.0224  | AMOTL1   | ENSG00000166025.18 | ENSP00000387739.2 | 9.2  | 2868 |
| IYQRHVYNL   | 9  | 0.0095  | TMEM209  | ENSG00000146842.17 | ENSP00000380747.2 | 7.6  | 1683 |
| KYMQSLEL    | 9  | 0.0284  | TTC14    | ENSG00000163728.11 | ENSP00000372027.4 | 9.6  | 1959 |
| RFIGATANF   | 9  | 0.0477  | RNASEH2C | ENSG00000172922.9  | ENSP00000308193.4 | 26.1 | 492  |
| VYQSKPATL   | 9  | 0.0122  | C17orf80 | ENSG00000141219.15 | ENSP00000268942.8 | 8.9  | 1719 |
| LYGRNFNYL   | 9  | 0.1239  | TENT4A   | ENSG00000112941.14 | ENSP00000230859.7 | 10.4 | 2376 |
| EVFTGGISSY  | 10 | 10.9008 | TENT4A   | ENSG00000112941.14 | ENSP00000230859.7 | 10.4 | 2376 |

|             |    |         |            |                    |                   |      |       |
|-------------|----|---------|------------|--------------------|-------------------|------|-------|
| DLGGLEALRQR | 11 | 45.0000 | FLYWCH1    | ENSG00000059122.16 | ENSP00000344122.5 | 31.0 | 1482  |
| AYIERMNYI   | 9  | 0.0535  | YES1       | ENSG00000176105.14 | ENSP00000324740.4 | 11.2 | 1629  |
| YYITTRAQF   | 9  | 0.0132  | YES1       | ENSG00000176105.14 | ENSP00000324740.4 | 11.2 | 1629  |
| RYFDVGLHNF  | 10 | 0.0031  | HHAT       | ENSG00000054392.13 | ENSP00000261458.3 | 6.8  | 1479  |
| RYAVIGADL   | 9  | 0.4147  | LCMT1      | ENSG00000205629.12 | ENSP00000382021.3 | 33.7 | 1002  |
| EVQDLHLAQR  | 10 | 36.0000 | MBOAT7     | ENSG00000125505.17 | ENSP00000375634.1 | 29.4 | 1032  |
| AWAPKPYHKF  | 10 | 0.0280  | MINK1      | ENSG00000141503.17 | ENSP00000347427.6 | 49.5 | 3996  |
| RYPPKSGNYF  | 10 | 0.0139  | MGRN1      | ENSG00000102858.13 | ENSP00000382487.4 | 28.4 | 1656  |
| KYNIFRSTF   | 9  | 0.0240  | ZNF181     | ENSG00000197841.15 | ENSP00000419435.1 | 9.8  | 1710  |
| YYFEVVQKL   | 9  | 0.0048  | CPNE3      | ENSG00000085719.13 | ENSP00000477590.1 | 50.5 | 1611  |
| QYNPKFQTL   | 9  | 0.0043  | YY1AP1     | ENSG00000163374.19 | ENSP00000352134.5 | 31.0 | 2217  |
| TYKPNPNQI   | 9  | 0.0304  | MTA3       | ENSG00000057935.13 | ENSP00000384249.1 | 14.1 | 1611  |
| KYAALFSQM   | 9  | 0.0872  | SAMD4B     | ENSG00000179134.15 | ENSP00000470237.1 | 57.4 | 2076  |
| SYLTIHHRI   | 9  | 0.0074  | ZNF12      | ENSG00000164631.19 | ENSP00000385939.1 | 10.4 | 2091  |
| SYDPDFNQL   | 9  | 0.0814  | FTSJ1      | ENSG00000068438.15 | ENSP00000326948.2 | 14.0 | 987   |
| TQVTVQKI    | 8  | 14.9111 | UVRAG      | ENSG00000198382.9  | ENSP00000348455.3 | 7.2  | 2097  |
| FYIHEVQEL   | 9  | 0.0347  | HERC4      | ENSG00000148634.15 | ENSP00000362804.4 | 15.9 | 3147  |
| KYIGFLVRL   | 9  | 0.0258  | LYL1       | ENSG00000104903.4  | ENSP00000264824.3 | 6.8  | 840   |
| NYSNVSIDL   | 9  | 0.0769  | CCDC82     | ENSG00000149231.14 | ENSP00000498266.1 | 10.2 | 1563  |
| IYHKLKHFKE  | 10 | 0.0942  | CCDC82     | ENSG00000149231.14 | ENSP00000498266.1 | 10.2 | 1563  |
| IYYTGKYQSL  | 10 | 0.1767  | MYCBP2     | ENSG00000005810.18 | ENSP00000444596.2 | 19.9 | 14034 |
| RYIDNSICGF  | 10 | 0.0360  | AC092724.1 | ENSG00000140876.11 | ENSP00000457566.1 | 22.8 | 510   |
| TYSPALNKME  | 10 | 0.0206  | TP53       | ENSG00000141510.17 | ENSP00000482537.1 | 13.5 | 1062  |
| EVHFPGGAER  | 10 | 19.1613 | RTL5       | ENSG00000242732.4  | ENSP00000418667.1 | 7.1  | 1707  |
| EAVGVTSQR   | 9  | 26.8000 | TRIM24     | ENSG00000122779.18 | ENSP00000390829.2 | 7.8  | 3048  |
| TYVSGTLRF   | 9  | 0.0075  | CEPT1      | ENSG00000134255.14 | ENSP00000477632.1 | 12.7 | 840   |
| KYTEITATYF  | 10 | 0.0092  | AGL        | ENSG00000162688.17 | ENSP00000355106.3 | 11.0 | 4596  |

|             |    |         |         |                    |                   |      |      |
|-------------|----|---------|---------|--------------------|-------------------|------|------|
| YYSHLEGARF  | 10 | 0.0970  | URB1    | ENSG00000142207.7  | ENSP00000372199.3 | 5.9  | 6813 |
| SYATLLHVL   | 9  | 0.0234  | GPR39   | ENSG00000183840.7  | ENSP00000327417.3 | 6.1  | 1359 |
| IYQKAFEHL   | 9  | 0.0057  | BBS4    | ENSG00000140463.14 | ENSP00000268057.4 | 15.5 | 1557 |
| QYASAFHFL   | 9  | 0.0114  | BBS4    | ENSG00000140463.14 | ENSP00000268057.4 | 15.5 | 1557 |
| RYLDASNEL   | 9  | 0.0559  | NEK4    | ENSG00000114904.13 | ENSP00000233027.5 | 10.3 | 2523 |
| RYIEELQKF   | 9  | 0.0011  | RALGPS1 | ENSG00000136828.19 | ENSP00000259351.5 | 13.6 | 1671 |
| TYAPAIHQI   | 9  | 0.0020  | ARID2   | ENSG00000189079.17 | ENSP00000335044.6 | 6.3  | 5505 |
| KYLINLETL   | 9  | 0.0319  | JAK2    | ENSG00000096968.13 | ENSP00000371067.3 | 7.3  | 3396 |
| NYSRNFSSF   | 9  | 0.0183  | PDZD2   | ENSG00000133401.16 | ENSP00000402033.1 | 17.6 | 8517 |
| KYQKGISLW   | 9  | 0.0113  | TRAM1L1 | ENSG00000174599.5  | ENSP00000309402.4 | 5.7  | 1107 |
| KYPLLLQSI   | 9  | 0.0188  | ARHGEF1 | ENSG00000076928.17 | ENSP00000470715.1 | 56.1 | 2904 |
| IYKIDFVRF   | 9  | 0.0145  | UNC119  | ENSG00000109103.11 | ENSP00000337040.3 | 14.8 | 720  |
| PYVGGLEEF   | 9  | 0.0597  | TEP1    | ENSG00000129566.13 | ENSP00000262715.5 | 12.8 | 7881 |
| YVIESARQR   | 9  | 18.2895 | SUPT20H | ENSG00000102710.20 | ENSP00000419754.1 | 22.4 | 2199 |
| KYPGHLAAITL | 11 | 0.1704  | ACTR5   | ENSG00000101442.10 | ENSP00000243903.4 | 5.6  | 1821 |
| AYSPAIQMF   | 9  | 0.0013  | UGGT2   | ENSG00000102595.20 | ENSP00000365938.3 | 10.5 | 4548 |
| AYLVHIEHL   | 9  | 0.0239  | MCC     | ENSG00000171444.18 | ENSP00000305617.4 | 6.6  | 2487 |
| GWYDEEHPLVF | 11 | 0.2655  | CLPB    | ENSG00000162129.14 | ENSP00000441518.1 | 7.6  | 2031 |
| NYAAALETf   | 9  | 0.0071  | SUGT1   | ENSG00000165416.14 | ENSP00000367208.4 | 11.3 | 1095 |
| KYDEGLYRF   | 9  | 0.0053  | DCLRE1A | ENSG00000198924.8  | ENSP00000355185.2 | 6.3  | 3120 |
| EYVKQTWNL   | 9  | 0.0598  | SYK     | ENSG00000165025.15 | ENSP00000364899.1 | 21.5 | 1836 |
| KYLEESNFV   | 9  | 0.2650  | SYK     | ENSG00000165025.15 | ENSP00000364899.1 | 21.5 | 1836 |
| VYLDKFIRL   | 9  | 0.0061  | GNL3L   | ENSG00000130119.16 | ENSP00000354091.2 | 5.9  | 1746 |
| VGYRVtQI    | 8  | 18.4474 | HERC5   | ENSG00000138646.9  | ENSP00000264350.3 | 5.5  | 3072 |
| VYSQILRKL   | 9  | 0.0181  | NUP85   | ENSG00000125450.11 | ENSP00000462749.1 | 18.3 | 1833 |
| RYKGPGEYF   | 10 | 0.0083  | RPUSD2  | ENSG00000166133.18 | ENSP00000323288.7 | 9.4  | 1635 |
| VYNPVRAEW   | 9  | 0.0093  | KBTBD6  | ENSG00000165572.7  | ENSP00000368799.1 | 5.5  | 2022 |

|            |    |         |          |                    |                   |      |      |
|------------|----|---------|----------|--------------------|-------------------|------|------|
| VYKPAQNSW  | 9  | 0.0224  | KBTBD6   | ENSG00000165572.7  | ENSP00000368799.1 | 5.5  | 2022 |
| IFIQNSKLYF | 10 | 0.1828  | SLC35A5  | ENSG00000138459.9  | ENSP00000417654.1 | 9.8  | 1272 |
| QQVILVQV   | 8  | 31.6667 | FNDC3B   | ENSG00000075420.13 | ENSP00000411242.2 | 14.4 | 3612 |
| IFTDVALKF  | 9  | 0.0213  | GTF3C4   | ENSG00000125484.12 | ENSP00000361219.4 | 5.9  | 2466 |
| RYTERVDYL  | 9  | 0.0795  | USP13    | ENSG00000058056.9  | ENSP00000263966.3 | 5.6  | 2589 |
| VYVQELQKL  | 9  | 0.0133  | EEA1     | ENSG00000102189.16 | ENSP00000317955.8 | 5.8  | 4233 |
| KYQHLKAEF  | 9  | 0.0187  | EEA1     | ENSG00000102189.16 | ENSP00000317955.8 | 5.8  | 4233 |
| KYTNIVKEM  | 9  | 0.1708  | CCDC146  | ENSG00000135205.15 | ENSP00000285871.4 | 7.4  | 2865 |
| KYTWHITNI  | 9  | 0.0900  | C2orf42  | ENSG00000115998.7  | ENSP00000404515.1 | 8.2  | 1722 |
| KYIDYIFNV  | 9  | 0.0937  | HERC6    | ENSG00000138642.14 | ENSP00000264346.7 | 7.5  | 3066 |
| AYLEAHETF  | 9  | 0.0026  | NUP107   | ENSG00000111581.10 | ENSP00000229179.4 | 6.6  | 2775 |
| QYEKLFHKW  | 9  | 0.0203  | ORC2     | ENSG00000115942.9  | ENSP00000234296.2 | 7.9  | 1731 |
| VYLKCLKKL  | 9  | 0.0587  | LEMD3    | ENSG00000174106.3  | ENSP00000308369.2 | 16.9 | 2733 |
| PYFNAPVYL  | 9  | 0.0836  | GAR1     | ENSG00000109534.17 | ENSP00000378127.3 | 18.1 | 651  |
| QYMELFNKI  | 9  | 0.0087  | MED20    | ENSG00000124641.16 | ENSP00000265350.4 | 11.1 | 636  |
| SMPDVLKI   | 8  | 3.5362  | TASOR    | ENSG00000163946.13 | ENSP00000399410.2 | 16.3 | 3699 |
| NQLVALVR   | 8  | 53.7500 | MON1A    | ENSG00000164077.14 | ENSP00000296473.3 | 13.0 | 1956 |
| TYTQDFNKF  | 9  | 0.0084  | CALCA    | ENSG00000110680.12 | ENSP00000331746.4 | 8.1  | 423  |
| IYPTAPPRF  | 9  | 0.0031  | LYPLAL1  | ENSG00000143353.12 | ENSP00000355894.3 | 22.2 | 663  |
| KMLDNFYNF  | 9  | 0.0692  | HIKESHI  | ENSG00000149196.16 | ENSP00000482151.1 | 14.5 | 393  |
| RQHVLTRI   | 8  | 14.1000 | CHD4     | ENSG00000111642.15 | ENSP00000496543.1 | 51.5 | 5697 |
| HYDPTINKW  | 9  | 0.0182  | ENC1     | ENSG00000171617.14 | ENSP00000306356.4 | 5.4  | 1767 |
| AYCLKYEKF  | 9  | 0.0574  | ASB3     | ENSG00000115239.22 | ENSP00000378206.2 | 10.8 | 1335 |
| AYVEWFNRL  | 9  | 0.0344  | RASGEF1B | ENSG00000138670.17 | ENSP00000425393.1 | 13.4 | 1416 |
| SYISKVDVL  | 9  | 0.0520  | ZFYVE26  | ENSG00000072121.16 | ENSP00000251119.5 | 8.1  | 7617 |
| RYQEVIQEL  | 9  | 0.0036  | ZFYVE26  | ENSG00000072121.16 | ENSP00000251119.5 | 8.1  | 7617 |
| KYQPRIAVF  | 9  | 0.0027  | TDG      | ENSG00000139372.15 | ENSP00000376611.3 | 8.9  | 1230 |

|             |    |         |         |                    |                   |      |      |
|-------------|----|---------|---------|--------------------|-------------------|------|------|
| IYNQVKQII   | 9  | 0.0475  | DLG1    | ENSG00000075711.21 | ENSP00000499602.1 | 31.3 | 2613 |
| IYTFPHASF   | 9  | 0.0101  | BTN3A3  | ENSG00000111801.16 | ENSP00000244519.2 | 14.0 | 1752 |
| RYAEAVQLL   | 9  | 0.0058  | TTC30A  | ENSG00000197557.7  | ENSP00000347915.4 | 5.1  | 1995 |
| NYIEKVVAI   | 9  | 0.0630  | ABI1    | ENSG00000136754.17 | ENSP00000365309.2 | 23.8 | 1428 |
| HYHPIVQRF   | 9  | 0.0015  | NOC3L   | ENSG00000173145.11 | ENSP00000360412.3 | 5.5  | 2400 |
| QYLLHLNLL   | 9  | 0.1021  | NSMAF   | ENSG00000035681.9  | ENSP00000038176.3 | 11.8 | 2751 |
| HSTIMPRL    | 8  | 16.4909 | MCM4    | ENSG00000104738.18 | ENSP00000497093.1 | 17.0 | 2247 |
| TYIQKIFRM   | 9  | 0.0217  | ACOX3   | ENSG00000087008.16 | ENSP00000413994.2 | 12.7 | 1872 |
| KYLLHSLVF   | 9  | 0.0206  | ACOX3   | ENSG00000087008.16 | ENSP00000413994.2 | 12.7 | 1872 |
| EVFDKDL SKL | 10 | 6.6548  | DAAM1   | ENSG00000100592.15 | ENSP00000378557.1 | 16.9 | 3234 |
| KYMEDVTQI   | 9  | 0.0173  | PPM1D   | ENSG00000170836.11 | ENSP00000306682.2 | 6.8  | 1815 |
| RFEEAHFTF   | 9  | 0.0219  | PIAS3   | ENSG00000131788.16 | ENSP00000376765.2 | 20.1 | 1884 |
| KYNLVTHIL   | 9  | 0.0219  | ZNF710  | ENSG00000140548.10 | ENSP00000268154.3 | 6.4  | 1992 |
| EVITKFINV   | 9  | 9.9000  | RASGRP3 | ENSG00000152689.18 | ENSP00000385886.3 | 11.8 | 2070 |
| AYIQEFQEF   | 9  | 0.0029  | OLFML1  | ENSG00000183801.8  | ENSP00000332511.3 | 6.8  | 1206 |
| VYTSGVYHI   | 9  | 0.0076  | TNS2    | ENSG00000111077.17 | ENSP00000319756.3 | 85.1 | 4257 |
| RYISYFSGL   | 9  | 0.1287  | TNS2    | ENSG00000111077.17 | ENSP00000319756.3 | 85.1 | 4257 |
| AYLNITKHL   | 9  | 0.0573  | POLK    | ENSG00000122008.15 | ENSP00000423526.1 | 9.7  | 1281 |
| TYPaelNNI   | 9  | 0.0939  | AHR     | ENSG00000106546.14 | ENSP00000242057.4 | 5.2  | 2544 |
| TYLNYVVHL   | 9  | 0.0154  | ZNF292  | ENSG00000188994.13 | ENSP00000358590.3 | 5.9  | 8169 |
| HYPPVQVLF   | 9  | 0.0012  | MSH6    | ENSG00000116062.15 | ENSP00000438580.1 | 7.8  | 3174 |
| TYVTILPEL   | 9  | 0.0485  | XRN1    | ENSG00000114127.10 | ENSP00000264951.4 | 7.3  | 5118 |
| IMPSSSHLF   | 9  | 0.0176  | XRN1    | ENSG00000114127.10 | ENSP00000264951.4 | 7.3  | 5118 |
| RYAWIKRQL   | 9  | 0.1307  | VPS53   | ENSG00000141252.20 | ENSP00000401435.2 | 6.8  | 2496 |
| QYGEVANLL   | 9  | 0.0729  | VPS53   | ENSG00000141252.20 | ENSP00000401435.2 | 6.8  | 2496 |
| EAFPSQGTKR  | 10 | 18.0000 | VPS53   | ENSG00000141252.20 | ENSP00000401435.2 | 6.8  | 2496 |
| KYPSDLPYM   | 9  | 0.0753  | ERG     | ENSG00000157554.19 | ENSP00000288319.7 | 10.5 | 1437 |

|            |    |         |            |                    |                   |      |       |
|------------|----|---------|------------|--------------------|-------------------|------|-------|
| VYSLIKNKI  | 9  | 0.0528  | PRKAG2     | ENSG00000106617.14 | ENSP00000499103.1 | 24.8 | 984   |
| QQTELSRI   | 8  | 24.8571 | AKAP9      | ENSG00000127914.16 | ENSP00000350813.3 | 39.3 | 9378  |
| KYITTTLFL  | 9  | 0.0306  | SLC4A11    | ENSG00000088836.14 | ENSP00000369396.3 | 19.6 | 2673  |
| RYISQPPLL  | 9  | 0.0072  | EDEM3      | ENSG00000116406.19 | ENSP00000318147.7 | 6.3  | 2796  |
| RYLERLIKL  | 9  | 0.0121  | AC006538.1 | ENSG00000172009.15 | ENSP00000304467.5 | 14.6 | 2067  |
| KYPHYFPLL  | 9  | 0.0063  | AC006538.1 | ENSG00000172009.15 | ENSP00000304467.5 | 14.6 | 2067  |
| KYFLKPEVL  | 9  | 0.0347  | NCEH1      | ENSG00000144959.10 | ENSP00000442464.1 | 13.5 | 1344  |
| KYLEETNSL  | 9  | 0.0234  | L3MBTL3    | ENSG00000198945.7  | ENSP00000437185.1 | 6.5  | 2265  |
| VFVDSVPEF  | 9  | 0.0235  | INTS9      | ENSG00000104299.15 | ENSP00000430943.1 | 10.5 | 1902  |
| TYARNLPAF  | 9  | 0.0080  | TTI2       | ENSG00000129696.12 | ENSP00000428401.1 | 9.8  | 1431  |
| KYIDFDHVF  | 9  | 0.0027  | CRAMP1     | ENSG00000007545.15 | ENSP00000380559.2 | 7.9  | 3807  |
| RYDPHLNRW  | 9  | 0.0184  | KLHL26     | ENSG00000167487.12 | ENSP00000300976.3 | 10.7 | 1845  |
| TYITSVSRL  | 9  | 0.0426  | OSGIN2     | ENSG00000164823.11 | ENSP00000297438.2 | 9.2  | 1515  |
| RYLSKVLEL  | 9  | 0.0106  | C15orf40   | ENSG00000169609.14 | ENSP00000403987.3 | 15.4 | 501   |
| IYTKIMDLI  | 9  | 0.0965  | DPY19L1    | ENSG00000173852.14 | ENSP00000490722.1 | 5.2  | 2244  |
| QQVQIHQI   | 8  | 11.8478 | BANP       | ENSG00000172530.20 | ENSP00000487304.1 | 15.6 | 1491  |
| KYVKVFHKF  | 9  | 0.0007  | ZNF680     | ENSG00000173041.12 | ENSP00000309330.6 | 6.2  | 1590  |
| RYKEENNDHL | 10 | 0.4608  | USP8       | ENSG00000138592.14 | ENSP00000412682.3 | 23.8 | 3036  |
| KYPHYFPVM  | 9  | 0.0445  | NLN        | ENSG00000123213.23 | ENSP00000423214.1 | 8.2  | 1800  |
| RYLNKAFHIW | 10 | 0.0835  | NCAPD3     | ENSG00000151503.12 | ENSP00000433681.2 | 8.6  | 4494  |
| LYSEVSHLL  | 9  | 0.0087  | RICTOR     | ENSG00000164327.13 | ENSP00000349959.3 | 6.7  | 5124  |
| KYVKVFHQF  | 9  | 0.0007  | ZNF486     | ENSG00000256229.8  | ENSP00000335042.7 | 4.9  | 1389  |
| TYISWKEEL  | 9  | 0.0517  | VPS13C     | ENSG00000129003.18 | ENSP00000249837.3 | 16.5 | 11130 |
| IYHPDIQLL  | 9  | 0.0039  | VPS13C     | ENSG00000129003.18 | ENSP00000249837.3 | 16.5 | 11130 |
| KYLEQQFNL  | 9  | 0.0194  | SLCO3A1    | ENSG00000176463.14 | ENSP00000320634.6 | 12.4 | 2130  |
| EVMLRVKEM  | 9  | 11.2446 | CDYL2      | ENSG00000166446.15 | ENSP00000476295.1 | 4.7  | 1518  |
| KYFLWEEKF  | 9  | 0.0073  | GRAP       | ENSG00000154016.13 | ENSP00000284154.5 | 5.1  | 651   |

|             |    |         |         |                    |                   |       |       |
|-------------|----|---------|---------|--------------------|-------------------|-------|-------|
| NYGDQVQHF   | 9  | 0.0077  | GRAP    | ENSG00000154016.13 | ENSP00000284154.5 | 5.1   | 651   |
| ETISTATGR   | 9  | 36.3333 | TM7SF2  | ENSG00000149809.14 | ENSP00000279263.7 | 29.1  | 1254  |
| KYMLKANLI   | 9  | 0.0535  | NAA15   | ENSG00000164134.13 | ENSP00000381920.1 | 6.9   | 2595  |
| DVHNFPGTSR  | 10 | 24.8571 | KPTN    | ENSG00000118162.14 | ENSP00000337850.2 | 12.1  | 1308  |
| RYTLQASTF   | 9  | 0.0214  | CUL1    | ENSG00000055130.17 | ENSP00000499276.1 | 30.2  | 2277  |
| YYLNEIQSF   | 9  | 0.0017  | SPATC1L | ENSG00000160284.15 | ENSP00000333869.6 | 7.3   | 558   |
| SYAKGLQKL   | 9  | 0.0186  | NOSTRIN | ENSG00000163072.15 | ENSP00000318921.7 | 27.2  | 1518  |
| IYADNQVMHF  | 10 | 0.0050  | POLE    | ENSG00000177084.16 | ENSP00000322570.5 | 6.7   | 6858  |
| SNQMLVPVI   | 9  | 10.3015 | WDR3    | ENSG00000065183.16 | ENSP00000308179.4 | 5.8   | 2829  |
| PYADQVFRI   | 9  | 0.0718  | HELZ    | ENSG00000198265.12 | ENSP00000351524.5 | 11.3  | 5826  |
| HYILHNSFF   | 9  | 0.0389  | TIPARP  | ENSG00000163659.13 | ENSP00000420612.1 | 7.1   | 1971  |
| SYLRESSLL   | 9  | 0.0912  | FLI1    | ENSG00000151702.17 | ENSP00000433488.2 | 11.0  | 1356  |
| AYPTVKFYF   | 9  | 0.0076  | DNAJC10 | ENSG00000077232.18 | ENSP00000264065.6 | 8.1   | 2379  |
| KYMDVVKERI  | 10 | 0.1639  | DDX24   | ENSG00000089737.17 | ENSP00000452145.1 | 37.4  | 2448  |
| LYGQVQVF    | 8  | 0.2918  | NOL9    | ENSG00000162408.11 | ENSP00000366934.5 | 5.5   | 2106  |
| VYTDFAFRI   | 9  | 0.0366  | NOL9    | ENSG00000162408.11 | ENSP00000366934.5 | 5.5   | 2106  |
| AVIEQEVRRER | 10 | 35.7500 | CC2D2A  | ENSG00000048342.16 | ENSP00000421809.1 | 36.6  | 4860  |
| VYATMPINSF  | 10 | 0.0113  | ZNF148  | ENSG00000163848.19 | ENSP00000353863.4 | 7.2   | 2382  |
| HVVGQGVLHR  | 10 | 35.0000 | OGFOD2  | ENSG00000111325.16 | ENSP00000442476.1 | 19.6  | 480   |
| KYPVLFQRI   | 9  | 0.0107  | AKAP13  | ENSG00000170776.21 | ENSP00000378026.2 | 25.5  | 8439  |
| SYIDVAVKL   | 9  | 0.0170  | TXNDC16 | ENSG00000087301.9  | ENSP00000281741.4 | 4.4   | 2475  |
| EIMEVAKER   | 9  | 26.0000 | ESS2    | ENSG00000100056.12 | ENSP00000252137.6 | 11.1  | 1428  |
| IFHEKTSEF   | 9  | 0.0529  | SLC7A2  | ENSG00000003989.17 | ENSP00000419140.1 | 4.6   | 1974  |
| TYLDKIKKF   | 9  | 0.0058  | SYNE2   | ENSG00000054654.16 | ENSP00000341781.4 | 137.7 | 20655 |
| KYLKAVEEL   | 9  | 0.0180  | SYNE2   | ENSG00000054654.16 | ENSP00000341781.4 | 137.7 | 20655 |
| TYVENLRLL   | 9  | 0.0305  | SYNE2   | ENSG00000054654.16 | ENSP00000341781.4 | 137.7 | 20655 |
| SYMMRAQQQL  | 9  | 0.0725  | SYNE2   | ENSG00000054654.16 | ENSP00000341781.4 | 137.7 | 20655 |

|             |    |         |            |                    |                   |       |       |
|-------------|----|---------|------------|--------------------|-------------------|-------|-------|
| STIISEVLGR  | 9  | 21.3636 | ZFAT       | ENSG00000066827.16 | ENSP00000428483.1 | 19.9  | 3693  |
| FYILTSKEL   | 9  | 0.1829  | STK17B     | ENSG00000081320.11 | ENSP00000263955.4 | 4.7   | 1116  |
| EEEEESDKRE  | 10 | 67.5000 | MCCC1      | ENSG00000078070.13 | ENSP00000419898.1 | 121.9 | 1848  |
| EVSWKVLER   | 9  | 21.6364 | PHKB       | ENSG00000102893.16 | ENSP00000313504.5 | 60.8  | 3279  |
| KYLEHPLLL   | 9  | 0.0043  | TTL        | ENSG00000114999.8  | ENSP00000233336.5 | 4.8   | 1131  |
| VYAEVSRL    | 9  | 0.0155  | TTL        | ENSG00000114999.8  | ENSP00000233336.5 | 4.8   | 1131  |
| VYAEVSRLLL  | 10 | 0.1287  | TTL        | ENSG00000114999.8  | ENSP00000233336.5 | 4.8   | 1131  |
| VYMPASSYQSL | 11 | 0.0476  | FAM126B    | ENSG00000155744.9  | ENSP00000393667.2 | 5.5   | 1590  |
| VLPGHFNTF   | 9  | 0.0411  | MBLAC2     | ENSG00000176055.10 | ENSP00000314776.6 | 4.3   | 837   |
| TYMDRVFKQF  | 10 | 0.0085  | ABHD3      | ENSG00000158201.10 | ENSP00000462578.1 | 10.2  | 642   |
| PWPKVLKI    | 8  | 1.6966  | EPB41      | ENSG00000159023.21 | ENSP00000497875.1 | 14.6  | 1626  |
| EVITAVRKM   | 9  | 8.2245  | COL6A3     | ENSG00000163359.15 | ENSP00000418285.1 | 11.0  | 7710  |
| KYPKVWEGF   | 9  | 0.0047  | SYMPK      | ENSG00000125755.18 | ENSP00000470957.1 | 42.4  | 285   |
| VYCLRTEYI   | 9  | 0.2183  | TOPBP1     | ENSG00000163781.13 | ENSP00000260810.5 | 7.5   | 4566  |
| KYKDAANLL   | 9  | 0.0484  | KLC1       | ENSG00000126214.21 | ENSP00000452487.1 | 42.1  | 1680  |
| VQPSLFYHL   | 9  | 0.2026  | MAP3K6     | ENSG00000142733.17 | ENSP00000363152.2 | 13.9  | 3840  |
| SYLNSVQRL   | 9  | 0.0162  | NUPL2      | ENSG00000136243.17 | ENSP00000415511.1 | 16.7  | 672   |
| KYITDVVKL   | 9  | 0.0227  | UTP20      | ENSG00000120800.5  | ENSP00000261637.4 | 4.0   | 8355  |
| KYPVEWAKF   | 9  | 0.0055  | ZC2HC1A    | ENSG00000104427.12 | ENSP00000263849.3 | 4.6   | 975   |
| KYRNIGSETW  | 10 | 0.1997  | IL13RA2    | ENSG00000123496.8  | ENSP00000243213.1 | 7.0   | 1140  |
| RYKPGEPITF  | 10 | 0.0074  | DENND1B    | ENSG00000213047.13 | ENSP00000479816.1 | 6.2   | 2325  |
| VYTLTTHL    | 9  | 0.0290  | C11orf80   | ENSG00000173715.16 | ENSP00000494645.1 | 15.5  | 1731  |
| IYLPEVRKI   | 9  | 0.0098  | TULP4      | ENSG00000130338.13 | ENSP00000356064.3 | 10.1  | 4629  |
| VYSEKVMHMF  | 10 | 0.0071  | MYO18A     | ENSG00000196535.16 | ENSP00000437073.1 | 28.1  | 6162  |
| ETASKTLSR   | 9  | 15.2754 | AC124319.1 | ENSG00000173821.19 | ENSP00000425956.2 | 40.9  | 15768 |
| IYPQVLHSL   | 9  | 0.0045  | AC124319.1 | ENSG00000173821.19 | ENSP00000425956.2 | 40.9  | 15768 |
| KYLKVFYKF   | 9  | 0.0014  | ZNF254     | ENSG00000213096.10 | ENSP00000349494.3 | 4.8   | 1977  |

|             |    |         |              |                    |                   |      |      |
|-------------|----|---------|--------------|--------------------|-------------------|------|------|
| EQPYKWEKF   | 9  | 0.5648  | ZNF254       | ENSG00000213096.10 | ENSP00000349494.3 | 4.8  | 1977 |
| NYSSAVQKF   | 9  | 0.0051  | OPHN1        | ENSG00000079482.13 | ENSP00000347710.5 | 5.0  | 2406 |
| KYPDIISRI   | 9  | 0.0067  | LIG1         | ENSG00000105486.14 | ENSP00000483027.1 | 10.6 | 2403 |
| YAEKLHRL    | 8  | 1.3663  | DST          | ENSG00000151914.20 | ENSP00000498983.1 | 35.8 | 7149 |
| TYAEKLHRL   | 9  | 0.0099  | DST          | ENSG00000151914.20 | ENSP00000498983.1 | 35.8 | 7149 |
| RYAEQISVL   | 9  | 0.0454  | CCDC121      | ENSG00000176714.9  | ENSP00000339087.2 | 4.7  | 834  |
| RYQALFHDF   | 9  | 0.0059  | VCPIP1       | ENSG00000175073.8  | ENSP00000309031.4 | 3.7  | 3666 |
| TYLVDMQRF   | 9  | 0.0095  | FZD2         | ENSG00000180340.6  | ENSP00000323901.3 | 3.7  | 1695 |
| VYSEVTPTF   | 9  | 0.0016  | PLXNA3       | ENSG00000130827.6  | ENSP00000358696.3 | 6.9  | 5613 |
| AYAPVLQDF   | 9  | 0.0033  | F8           | ENSG00000185010.15 | ENSP00000353393.4 | 9.6  | 7053 |
| EYAKIFTTY   | 9  | 0.1573  | LPCAT2       | ENSG00000087253.13 | ENSP00000262134.5 | 5.2  | 1632 |
| TYISAIRERF  | 10 | 0.0194  | NXF1         | ENSG00000162231.14 | ENSP00000294172.2 | 53.2 | 1857 |
| IYSTKLYRF   | 9  | 0.0022  | BTBD10       | ENSG00000148925.10 | ENSP00000435257.1 | 9.1  | 1281 |
| KYGLFQHI    | 8  | 0.4548  | DHCR24       | ENSG00000116133.13 | ENSP00000360316.3 | 21.8 | 1548 |
| EVIAYILER   | 9  | 22.2632 | MED23        | ENSG00000112282.18 | ENSP00000357047.3 | 12.8 | 4104 |
| VYITGKEVF   | 9  | 0.0138  | VPS13A       | ENSG00000197969.14 | ENSP00000496361.1 | 10.0 | 9207 |
| EVFSFKMVSF  | 10 | 14.2667 | VPS13A       | ENSG00000197969.14 | ENSP00000496361.1 | 10.0 | 9207 |
| TYSEQWQQL   | 9  | 0.0200  | FES          | ENSG00000182511.12 | ENSP00000331504.3 | 12.5 | 2466 |
| TYHNWRHGF   | 9  | 0.0525  | PDE6B        | ENSG00000133256.12 | ENSP00000420295.1 | 8.4  | 2562 |
| RFQERFFLL   | 9  | 0.0866  | ARAP3        | ENSG00000120318.16 | ENSP00000421468.1 | 14.2 | 3579 |
| EVAEKIWSNR  | 10 | 27.1000 | ARAP3        | ENSG00000120318.16 | ENSP00000421468.1 | 14.2 | 3579 |
| KYGVFEESL   | 9  | 0.2812  | TRIM6-TRIM34 | ENSG00000258588.3  | ENSP00000346916.5 | 3.4  | 2526 |
| RYMEHLEKI   | 9  | 0.0075  | KIAA0895     | ENSG00000164542.12 | ENSP00000319251.6 | 7.2  | 1407 |
| IQMSVQRI    | 8  | 6.7323  | POLR2B       | ENSG00000047315.16 | ENSP00000370625.1 | 45.0 | 3522 |
| NYVQAVEEF   | 9  | 0.0143  | NASP         | ENSG00000132780.17 | ENSP00000438871.1 | 35.3 | 2172 |
| RYPDNLKHL   | 9  | 0.0512  | CCDC59       | ENSG00000133773.12 | ENSP00000256151.7 | 19.5 | 723  |
| RYPDNLKHLYL | 11 | 0.1569  | CCDC59       | ENSG00000133773.12 | ENSP00000256151.7 | 19.5 | 723  |

|             |    |         |            |                    |                   |       |      |
|-------------|----|---------|------------|--------------------|-------------------|-------|------|
| KYPL LISRI  | 9  | 0.0231  | ARHGEF2    | ENSG00000116584.18 | ENSP00000315325.7 | 35.8  | 2874 |
| KYFSDGSSNTF | 11 | 0.0197  | BTBD3      | ENSG00000132640.15 | ENSP00000384545.1 | 13.2  | 1566 |
| VYSFGFERL   | 9  | 0.0620  | SLC30A6    | ENSG00000152683.14 | ENSP00000384041.1 | 6.3   | 1161 |
| RYAQQKHRI   | 9  | 0.0664  | HDAC6      | ENSG00000094631.20 | ENSP00000496013.1 | 149.5 | 3645 |
| IYKWITDNF   | 9  | 0.0111  | FOXJ1      | ENSG00000129654.8  | ENSP00000323880.4 | 3.3   | 1263 |
| YYITTRVQF   | 9  | 0.0072  | FGR        | ENSG00000000938.13 | ENSP00000363115.3 | 7.6   | 1587 |
| RYTTEFHEL   | 9  | 0.0150  | WEE1       | ENSG00000166483.11 | ENSP00000402084.2 | 6.9   | 1938 |
| IYIINVHSM   | 9  | 0.0272  | DENND3     | ENSG00000105339.10 | ENSP00000410594.1 | 16.2  | 3438 |
| SQLRTTVV    | 8  | 23.1875 | MTSS1      | ENSG00000170873.18 | ENSP00000429064.1 | 62.4  | 2265 |
| VYTYIQSRF   | 9  | 0.0084  | DYRK2      | ENSG00000127334.10 | ENSP00000342105.3 | 4.8   | 1803 |
| YTADPYHAL   | 9  | 1.0020  | RBFOX2     | ENSG00000100320.23 | ENSP00000405651.2 | 21.1  | 1128 |
| VYTLYTHSF   | 9  | 0.0023  | ENTPD3     | ENSG00000168032.9  | ENSP00000301825.3 | 3.3   | 1587 |
| YQFGEIRTI   | 9  | 1.3180  | RBM22      | ENSG00000086589.12 | ENSP00000412118.2 | 32.4  | 1113 |
| KYVKVIHKF   | 9  | 0.0009  | AC008554.1 | ENSG00000237440.9  | ENSP00000395733.3 | 4.8   | 1608 |
| EYVKFLHKF   | 9  | 0.0036  | ZNF506     | ENSG00000081665.14 | ENSP00000440625.1 | 10.6  | 1332 |
| SIVDSILMER  | 10 | 27.5000 | RBM25      | ENSG00000119707.14 | ENSP00000261973.7 | 22.5  | 2529 |
| AVVPFLPLQR  | 10 | 20.0000 | TOR2A      | ENSG00000160404.18 | ENSP00000362381.5 | 6.4   | 963  |
| TYQEVAQKF   | 9  | 0.0014  | ADA2       | ENSG00000093072.18 | ENSP00000496894.1 | 11.8  | 207  |
| KFVETHPEF   | 9  | 0.0294  | ADA2       | ENSG00000093072.18 | ENSP00000496894.1 | 11.8  | 207  |
| IYTKLNQKI   | 9  | 0.0210  | EXOC6      | ENSG00000138190.16 | ENSP00000260762.6 | 5.6   | 2412 |
| EVIRTLPSL   | 9  | 4.4804  | INPP5D     | ENSG00000168918.14 | ENSP00000405338.2 | 8.5   | 3567 |
| RYLADLPTL   | 9  | 0.0275  | CEP85      | ENSG00000130695.15 | ENSP00000252992.4 | 7.4   | 2286 |
| KYPELFANL   | 9  | 0.0117  | PEX1       | ENSG00000127980.16 | ENSP00000394413.1 | 15.7  | 3678 |
| MYINEVERL   | 9  | 0.0286  | PTPN14     | ENSG00000152104.12 | ENSP00000355923.4 | 4.3   | 3561 |
| AQYKFVYQV   | 9  | 2.6444  | PTPN14     | ENSG00000152104.12 | ENSP00000355923.4 | 4.3   | 3561 |
| YYAKEIHKF   | 9  | 0.0007  | TGFB3      | ENSG00000119699.7  | ENSP00000238682.3 | 7.2   | 1236 |
| LYKPKQE VKF | 10 | 0.0920  | CD109      | ENSG00000156535.15 | ENSP00000388062.2 | 10.9  | 4284 |

|            |    |         |            |                    |                   |      |      |
|------------|----|---------|------------|--------------------|-------------------|------|------|
| IYLRDPVQV  | 9  | 0.1470  | TPP2       | ENSG00000134900.12 | ENSP00000365220.3 | 11.2 | 3786 |
| TYERGTYYF  | 9  | 0.0164  | AC092881.1 | ENSG00000111596.12 | ENSP00000449260.1 | 19.4 | 1620 |
| FTAPSTVGKR | 10 | 27.5000 | PARN       | ENSG00000140694.17 | ENSP00000498650.1 | 20.9 | 1743 |
| TQYIFTEKL  | 9  | 2.3914  | NAF1       | ENSG00000145414.9  | ENSP00000274054.2 | 7.9  | 1482 |
| RYQTKFRHL  | 9  | 0.0887  | CEP89      | ENSG00000121289.18 | ENSP00000465141.1 | 16.8 | 1284 |
| RYTEITREKF | 10 | 0.0135  | CEP89      | ENSG00000121289.18 | ENSP00000465141.1 | 16.8 | 1284 |
| RYILTLHEL  | 9  | 0.0085  | RASGRF2    | ENSG00000113319.13 | ENSP00000265080.4 | 5.3  | 3711 |
| AYQAVVWKI  | 9  | 0.0383  | STON1      | ENSG00000243244.6  | ENSP00000384615.1 | 6.9  | 2205 |
| EAIGTLTAR  | 9  | 26.1000 | APBB3      | ENSG00000113108.19 | ENSP00000346378.5 | 19.8 | 1479 |
| DYKRLFFRF  | 9  | 0.1027  | TRANK1     | ENSG00000168016.14 | ENSP00000494480.1 | 4.0  | 8907 |
| VYENVSHFL  | 9  | 0.0503  | SLC25A32   | ENSG00000164933.12 | ENSP00000297578.4 | 8.9  | 945  |
| TYLSIIHSL  | 9  | 0.0045  | MPRIP      | ENSG00000133030.21 | ENSP00000317786.6 | 74.7 | 5382 |
| SYIEVSHGL  | 9  | 0.0316  | SYNPO2     | ENSG00000172403.11 | ENSP00000425496.1 | 7.9  | 3465 |
| YYEKLHTYF  | 9  | 0.0121  | ITGB4      | ENSG00000132470.14 | ENSP00000200181.3 | 8.3  | 5466 |
| KYGVWGF    | 8  | 0.2160  | CYP3A4     | ENSG00000160868.15 | ENSP00000337915.3 | 5.1  | 1602 |
| KYWTEPEKF  | 9  | 0.0062  | CYP3A4     | ENSG00000160868.15 | ENSP00000337915.3 | 5.1  | 1602 |
| EIIQAQLVNR | 10 | 43.0000 | CEP63      | ENSG00000182923.17 | ENSP00000336524.3 | 15.8 | 2109 |
| NYLTKIYGL  | 9  | 0.1445  | PODN       | ENSG00000174348.13 | ENSP00000308315.5 | 3.7  | 1983 |
| TYKDKMTFF  | 9  | 0.0248  | SRL        | ENSG00000185739.13 | ENSP00000382518.3 | 3.2  | 1419 |
| EYDLIVHQL  | 9  | 0.1080  | VPS26A     | ENSG00000122958.15 | ENSP00000263559.6 | 30.8 | 981  |
| TYPDVNNNSI | 9  | 0.0636  | VPS26A     | ENSG00000122958.15 | ENSP00000263559.6 | 30.8 | 981  |
| VLPQRFPQF  | 9  | 0.0393  | CNOT4      | ENSG00000080802.18 | ENSP00000399108.2 | 11.3 | 1716 |
| KYVKVFNKF  | 9  | 0.0017  | ZNF675     | ENSG00000197372.9  | ENSP00000352836.3 | 4.2  | 1704 |
| KYLTAASYL  | 9  | 0.0951  | ZBTB6      | ENSG00000186130.5  | ENSP00000362763.3 | 2.9  | 1272 |
| RYLDEINLL  | 9  | 0.0090  | GNA15      | ENSG00000060558.3  | ENSP00000262958.2 | 2.9  | 1122 |
| AYTLLLHTW  | 9  | 0.0151  | DOCK2      | ENSG00000134516.17 | ENSP00000429283.2 | 4.8  | 5490 |
| RYLPSHRLI  | 9  | 0.0189  | GIMAP6     | ENSG00000133561.15 | ENSP00000418304.1 | 14.4 | 186  |

|             |    |        |           |                    |                   |      |       |
|-------------|----|--------|-----------|--------------------|-------------------|------|-------|
| NYIKDLNIL   | 9  | 0.1257 | CTDSPL2   | ENSG00000137770.14 | ENSP00000260327.4 | 4.8  | 1398  |
| SYFSGSHMF   | 9  | 0.0020 | CCNJL     | ENSG00000135083.15 | ENSP00000257536.7 | 3.3  | 1161  |
| SYVNHLYVI   | 9  | 0.0396 | RAPGEF5   | ENSG00000136237.19 | ENSP00000343656.6 | 11.8 | 2190  |
| YDTVFKHF    | 8  | 0.8126 | SP140L    | ENSG00000185404.16 | ENSP00000395195.1 | 6.4  | 1314  |
| VYDTVFKHF   | 9  | 0.0053 | SP140L    | ENSG00000185404.16 | ENSP00000395195.1 | 6.4  | 1314  |
| IYIRYLYKL   | 9  | 0.0139 | DOCK5     | ENSG00000147459.18 | ENSP00000276440.7 | 4.1  | 5610  |
| RYLPQCSYF   | 9  | 0.0063 | CCND2     | ENSG00000118971.8  | ENSP00000261254.3 | 3.1  | 867   |
| EYIPKWEQF   | 9  | 0.0029 | C3orf14   | ENSG00000114405.10 | ENSP00000232519.5 | 6.6  | 384   |
| RYSGNQVLF   | 9  | 0.0057 | RAPGEF6   | ENSG00000158987.20 | ENSP00000421684.1 | 4.1  | 4803  |
| HVRDSYSQM   | 9  | 9.0583 | ATP9B     | ENSG00000166377.20 | ENSP00000398076.2 | 15.7 | 3441  |
| KYSSGFRNI   | 9  | 0.0808 | ATM       | ENSG00000149311.18 | ENSP00000435747.1 | 13.5 | 4107  |
| TYVIYAHLL   | 9  | 0.0434 | HECTD2    | ENSG00000165338.16 | ENSP00000298068.5 | 4.3  | 2328  |
| KYNANFVTF   | 9  | 0.0016 | KDM2A     | ENSG00000173120.15 | ENSP00000432786.1 | 45.1 | 3486  |
| EFVAKGHLF   | 9  | 0.1996 | MED18     | ENSG00000130772.14 | ENSP00000362948.4 | 5.9  | 624   |
| EYFRVPDSATF | 11 | 0.0650 | VPS13B    | ENSG00000132549.18 | ENSP00000349685.2 | 7.9  | 11991 |
| KYLSGLVQW   | 9  | 0.0113 | EMC3      | ENSG00000125037.12 | ENSP00000408803.1 | 40.5 | 609   |
| RYGGPLGITI  | 10 | 0.1872 | GRIP2     | ENSG00000144596.13 | ENSP00000481670.2 | 5.4  | 996   |
| RYAVYWDEL   | 9  | 0.2374 | DDHD2     | ENSG00000085788.13 | ENSP00000380352.2 | 24.5 | 2133  |
| KYVKIVEKW   | 9  | 0.0083 | RWDD3     | ENSG00000122481.17 | ENSP00000263893.6 | 11.0 | 585   |
| AYHNWRHAF   | 9  | 0.0553 | PDE5A     | ENSG00000138735.16 | ENSP00000347046.3 | 6.3  | 2625  |
| VYEVVVERF   | 9  | 0.0088 | TUT4      | ENSG00000134744.14 | ENSP00000257177.4 | 19.1 | 4935  |
| KYLDVKFEYL  | 10 | 0.0921 | PICK1     | ENSG00000100151.16 | ENSP00000385205.3 | 31.8 | 1245  |
| SYLIQHQRF   | 9  | 0.0091 | ZNF71     | ENSG00000197951.9  | ENSP00000328245.5 | 3.7  | 1467  |
| VYERELQTF   | 9  | 0.0106 | EEF1AKMT2 | ENSG00000203791.15 | ENSP00000357829.2 | 5.2  | 873   |
| RYDNVTILF   | 9  | 0.0074 | GUCY1B1   | ENSG00000061918.13 | ENSP00000264424.8 | 16.4 | 1857  |
| TYHPGVPEF   | 9  | 0.0025 | CHORDC1   | ENSG00000110172.12 | ENSP00000319255.6 | 8.1  | 996   |
| EYLKHHNRI   | 9  | 0.1628 | GZF1      | ENSG00000125812.16 | ENSP00000366250.2 | 5.3  | 2133  |

|             |    |        |         |                    |                   |      |      |
|-------------|----|--------|---------|--------------------|-------------------|------|------|
| YLEKAIKI    | 8  | 2.3986 | USP7    | ENSG00000187555.15 | ENSP00000343535.4 | 39.7 | 3306 |
| TYLEKAIKI   | 9  | 0.0206 | USP7    | ENSG00000187555.15 | ENSP00000343535.4 | 39.7 | 3306 |
| RYNHITATY   | 9  | 0.1472 | SNRK    | ENSG00000163788.14 | ENSP00000296088.7 | 6.6  | 2295 |
| RYNHITATYF  | 10 | 0.0305 | SNRK    | ENSG00000163788.14 | ENSP00000296088.7 | 6.6  | 2295 |
| TYPQLEGFKF  | 10 | 0.0214 | WDFY4   | ENSG00000128815.19 | ENSP00000320563.5 | 3.7  | 9552 |
| KYTAVVKMI   | 9  | 0.1167 | KIN     | ENSG00000151657.12 | ENSP00000368881.3 | 3.3  | 1179 |
| KYIENLDNITF | 11 | 0.0112 | ZFYVE16 | ENSG00000039319.17 | ENSP00000426848.1 | 9.3  | 4617 |
| EYLGKLVRF   | 9  | 0.0124 | RSAD2   | ENSG00000134321.12 | ENSP00000371471.3 | 3.0  | 1083 |
| IYEQVFAKL   | 9  | 0.0513 | NRDE2   | ENSG00000119720.18 | ENSP00000346335.3 | 6.1  | 3492 |
| SYANVQDGF   | 9  | 0.0646 | ANKRD22 | ENSG00000152766.6  | ENSP00000360998.4 | 2.6  | 573  |
| KYQNVKHNL   | 9  | 0.0261 | ZMYM1   | ENSG00000197056.11 | ENSP00000352920.4 | 3.5  | 3426 |
| KYITEVSRW   | 9  | 0.0214 | CEP135  | ENSG00000174799.10 | ENSP00000257287.3 | 4.6  | 3420 |
| SFTQKSHLF   | 9  | 0.0377 | ZNF175  | ENSG00000105497.8  | ENSP00000262259.2 | 3.2  | 2133 |
| IYKDSSTFL   | 9  | 0.0775 | METTL14 | ENSG00000145388.15 | ENSP00000373474.3 | 8.0  | 1368 |
| YYNPVTDKW   | 9  | 0.0049 | KLHL3   | ENSG00000146021.15 | ENSP00000312397.4 | 8.4  | 1761 |
| NYENKQYLF   | 9  | 0.0346 | WDR66   | ENSG00000158023.10 | ENSP00000380595.2 | 7.8  | 2823 |
| EYNKSWQTF   | 9  | 0.0089 | ZNF583  | ENSG00000198440.9  | ENSP00000291598.7 | 3.1  | 1707 |
| NYKSHHLQL   | 9  | 0.1715 | CWF19L1 | ENSG00000095485.18 | ENSP00000326411.6 | 8.5  | 1614 |
| SYVHKVPSF   | 9  | 0.0040 | MED13L  | ENSG00000123066.8  | ENSP00000281928.3 | 16.7 | 6630 |
| TYEAQFFGF   | 9  | 0.0574 | MIS12   | ENSG00000167842.15 | ENSP00000461252.1 | 6.6  | 615  |
| KYMETIEKL   | 9  | 0.0049 | PPP1R21 | ENSG00000162869.16 | ENSP00000281394.4 | 40.5 | 2307 |
| KYFALPHKI   | 9  | 0.0062 | TUT7    | ENSG00000083223.18 | ENSP00000365130.3 | 7.9  | 4485 |
| SYTANLAAF   | 9  | 0.0495 | GRIK5   | ENSG00000105737.9  | ENSP00000470251.1 | 12.2 | 2940 |
| VYAVVRGLF   | 9  | 0.0388 | MFSD13A | ENSG00000138111.14 | ENSP00000238936.3 | 4.7  | 1551 |
| KYNDFGNSF   | 9  | 0.0084 | ZNF3    | ENSG00000166526.17 | ENSP00000299667.4 | 12.3 | 1338 |
| RYSAGWDAKFF | 11 | 0.3270 | HSD17B6 | ENSG00000025423.11 | ENSP00000318631.1 | 2.3  | 951  |
| RWFQPAIPSW  | 10 | 0.0985 | UNC13D  | ENSG00000092929.11 | ENSP00000207549.3 | 5.8  | 3270 |

|             |    |         |         |                    |                   |      |      |
|-------------|----|---------|---------|--------------------|-------------------|------|------|
| TYNKHINISF  | 10 | 0.0544  | THAP2   | ENSG00000173451.7  | ENSP00000310796.2 | 3.4  | 684  |
| TFTFSHATF   | 9  | 0.0994  | TRIM27  | ENSG00000204713.11 | ENSP00000366404.3 | 14.6 | 1539 |
| EVSFYNVTER  | 10 | 47.0000 | TRIM27  | ENSG00000204713.11 | ENSP00000366404.3 | 14.6 | 1539 |
| EIKERIAKR   | 9  | 22.6842 | BIN2    | ENSG00000110934.11 | ENSP00000483983.2 | 5.3  | 1695 |
| TYLEKAVEV   | 9  | 0.2187  | ATM     | ENSG00000149311.18 | ENSP00000278616.4 | 13.5 | 9168 |
| KYVSSVLSF   | 9  | 0.0043  | LTN1    | ENSG00000198862.14 | ENSP00000478783.1 | 7.3  | 5436 |
| SYLENPTS    | 9  | 0.1439  | TFEB    | ENSG00000112561.18 | ENSP00000343948.6 | 26.4 | 1686 |
| KYTEKLEEI   | 9  | 0.0543  | CEP41   | ENSG00000106477.19 | ENSP00000342738.5 | 6.2  | 903  |
| LYKDVRDLL   | 9  | 0.1675  | ANKZF1  | ENSG00000163516.13 | ENSP00000321617.5 | 23.1 | 2178 |
| KYVKVFHKY   | 9  | 0.0542  | ZNF708  | ENSG00000182141.10 | ENSP00000349401.2 | 4.1  | 1689 |
| SYLDVKGNHF  | 10 | 0.0117  | LRR8C   | ENSG00000171488.15 | ENSP00000359483.4 | 2.2  | 2409 |
| RYQEMIQKL   | 9  | 0.0039  | SCLT1   | ENSG00000151466.12 | ENSP00000281142.5 | 2.9  | 2064 |
| RYIHKLYDL   | 9  | 0.0583  | DOCK4   | ENSG00000128512.22 | ENSP00000499282.1 | 10.3 | 2694 |
| MYIRYIHL    | 9  | 0.0063  | DOCK4   | ENSG00000128512.22 | ENSP00000499282.1 | 10.3 | 2694 |
| LYAKIAEAF   | 9  | 0.0114  | GIPC3   | ENSG00000179855.8  | ENSP00000493901.1 | 2.3  | 936  |
| NYPVWDTQF   | 9  | 0.0277  | TAF5    | ENSG00000148835.11 | ENSP00000358854.3 | 2.0  | 2400 |
| QYAVLLNRF   | 9  | 0.0115  | NSUN3   | ENSG00000178694.10 | ENSP00000318986.4 | 3.9  | 1020 |
| ELLHFQASQR  | 10 | 43.5000 | IKBKG   | ENSG00000269335.5  | ENSP00000471166.1 | 8.0  | 1257 |
| KYLSDVV     | 8  | 4.2269  | SLC38A6 | ENSG00000139974.15 | ENSP00000437190.1 | 10.1 | 687  |
| RYLPGFNLQF  | 11 | 0.0095  | PTK2    | ENSG00000169398.19 | ENSP00000429082.1 | 62.1 | 3288 |
| KYMEGSKLHYF | 11 | 0.0054  | PIGW    | ENSG00000277161.2  | ENSP00000482202.1 | 2.4  | 1512 |
| VYWDSAGAAHF | 11 | 0.0353  | CHST12  | ENSG00000136213.10 | ENSP00000411207.1 | 3.6  | 735  |
| IYKEDFNEL   | 9  | 0.0365  | WDR17   | ENSG00000150627.15 | ENSP00000422763.1 | 4.2  | 3849 |
| EYMIQFNRL   | 9  | 0.0961  | HELZ2   | ENSG00000130589.16 | ENSP00000393257.2 | 4.6  | 6240 |
| NYIEGTKLF   | 9  | 0.0106  | CNDP1   | ENSG00000150656.15 | ENSP00000351682.3 | 2.7  | 1521 |
| KYFDKVVTL   | 9  | 0.0039  | KIF7    | ENSG00000166813.15 | ENSP00000377934.3 | 2.7  | 4029 |
| NYIPYLTKL   | 9  | 0.0120  | SAMD9   | ENSG00000205413.8  | ENSP00000369292.2 | 2.7  | 4767 |

|              |    |         |          |                    |                   |      |      |
|--------------|----|---------|----------|--------------------|-------------------|------|------|
| EYNNNFHVL    | 9  | 0.0774  | IPMK     | ENSG00000151151.6  | ENSP00000363046.3 | 1.8  | 1248 |
| EVVNYVQKR    | 9  | 28.0000 | RMI1     | ENSG00000178966.16 | ENSP00000317039.3 | 4.8  | 1875 |
| QYIDVSHVF    | 9  | 0.0019  | RFX2     | ENSG00000087903.13 | ENSP00000306335.4 | 4.0  | 2169 |
| RYDTITNQW    | 9  | 0.0190  | KLHL29   | ENSG00000119771.15 | ENSP00000420659.1 | 4.5  | 2625 |
| AFIKKSHLL    | 9  | 0.1565  | ZNF684   | ENSG00000117010.17 | ENSP00000497154.1 | 5.8  | 1134 |
| AQILTVKV     | 8  | 24.0714 | LRRK2    | ENSG00000188906.16 | ENSP00000298910.7 | 23.4 | 7581 |
| EYLLVPSSL    | 9  | 0.1273  | LRRK2    | ENSG00000188906.16 | ENSP00000298910.7 | 23.4 | 7581 |
| IYGEGFQTW    | 9  | 0.0041  | ALG9     | ENSG00000086848.15 | ENSP00000482437.1 | 7.1  | 1854 |
| RVQDKYFHI    | 9  | 0.8341  | ABLIM2   | ENSG00000163995.20 | ENSP00000393511.2 | 5.2  | 1935 |
| SFSTVHEKF    | 9  | 0.0219  | WDR36    | ENSG00000134987.11 | ENSP00000424628.3 | 4.9  | 2685 |
| AYGNVFSAF    | 9  | 0.0209  | WDR36    | ENSG00000134987.11 | ENSP00000424628.3 | 4.9  | 2685 |
| VQTAILRV     | 8  | 21.6818 | PPP1R13B | ENSG00000088808.17 | ENSP00000202556.9 | 25.0 | 3270 |
| IFHEVPLKF    | 9  | 0.0046  | ICE2     | ENSG00000128915.12 | ENSP00000261520.4 | 8.0  | 2946 |
| RYPDTIALTF   | 10 | 0.0026  | MAPKBP1  | ENSG00000137802.14 | ENSP00000426154.1 | 7.1  | 3693 |
| VYNDHSIYVW   | 10 | 0.0502  | MAPKBP1  | ENSG00000137802.14 | ENSP00000426154.1 | 7.1  | 3693 |
| ELIKISEGTGFR | 12 | 53.7500 | DDX52    | ENSG00000278053.5  | ENSP00000479504.1 | 9.4  | 1797 |
| AYLTVHQRI    | 9  | 0.0237  | ZNF570   | ENSG00000171827.10 | ENSP00000331540.1 | 2.5  | 1608 |
| IYQDVTLKW    | 9  | 0.0040  | BBS9     | ENSG00000122507.20 | ENSP00000242067.6 | 8.7  | 2661 |
| KFVNKSYLL    | 9  | 0.1769  | SHQ1     | ENSG00000144736.14 | ENSP00000315182.8 | 5.9  | 1731 |
| KYELDFS HF   | 9  | 0.0484  | TLR2     | ENSG00000137462.8  | ENSP00000494425.1 | 3.1  | 2352 |
| RYMNHMQSL    | 9  | 0.0187  | ARIH1    | ENSG00000166233.15 | ENSP00000369217.4 | 10.9 | 1671 |
| RYFDGNLEKL   | 10 | 0.0944  | ARIH1    | ENSG00000166233.15 | ENSP00000369217.4 | 10.9 | 1671 |
| VYSGGVYLF    | 9  | 0.0015  | TMEM161A | ENSG00000064545.14 | ENSP00000162044.7 | 18.8 | 1437 |
| YFINRSWEW    | 9  | 0.0796  | FAR2     | ENSG00000064763.11 | ENSP00000443291.2 | 2.6  | 1545 |
| EVVGVYGSF    | 9  | 3.4547  | DGKE     | ENSG00000153933.10 | ENSP00000284061.3 | 2.8  | 1701 |
| VMPKKVFKI    | 9  | 0.1848  | XYLT1    | ENSG00000103489.11 | ENSP00000261381.6 | 1.5  | 2877 |
| RYLPRLHLV    | 9  | 0.0182  | MGA      | ENSG00000174197.16 | ENSP00000457035.1 | 6.8  | 9195 |

|             |    |         |           |                    |                   |      |      |
|-------------|----|---------|-----------|--------------------|-------------------|------|------|
| EVIGLLGGR   | 9  | 42.0000 | MYSM1     | ENSG00000162601.11 | ENSP00000478391.1 | 5.7  | 702  |
| EVIGLLGGRY  | 10 | 39.0000 | MYSM1     | ENSG00000162601.11 | ENSP00000478391.1 | 5.7  | 702  |
| EVIEMVRKR   | 9  | 23.6875 | ROR1      | ENSG00000185483.12 | ENSP00000441637.2 | 2.7  | 2646 |
| NQVILRTV    | 8  | 20.9259 | DDX60L    | ENSG00000181381.13 | ENSP00000260184.7 | 3.8  | 5118 |
| LYIGHLTTL   | 9  | 0.0267  | ERC1      | ENSG00000082805.20 | ENSP00000354158.3 | 10.0 | 3348 |
| VYILQPEVI   | 9  | 0.0364  | CPLANE1   | ENSG00000197603.14 | ENSP00000498265.1 | 5.9  | 6852 |
| HYKPTPLYF   | 9  | 0.0037  | SMC4      | ENSG00000113810.16 | ENSP00000417964.1 | 7.5  | 3789 |
| RYFEVGAPVYF | 11 | 0.0147  | NPC1L1    | ENSG00000015520.14 | ENSP00000370552.3 | 1.7  | 3996 |
| AYALLLQHL   | 9  | 0.0246  | SLC26A6   | ENSG00000225697.13 | ENSP00000401813.1 | 32.0 | 540  |
| RYNPNLNTW   | 9  | 0.0060  | KLHL11    | ENSG00000178502.6  | ENSP00000314608.3 | 1.4  | 2124 |
| VYNPELDKW   | 9  | 0.0360  | KLHL11    | ENSG00000178502.6  | ENSP00000314608.3 | 1.4  | 2124 |
| YVSRPSHF    | 8  | 1.0365  | STAT2     | ENSG00000170581.14 | ENSP00000450751.1 | 25.6 | 2541 |
| VYVSRPSHF   | 9  | 0.0058  | STAT2     | ENSG00000170581.14 | ENSP00000450751.1 | 25.6 | 2541 |
| AYVEDTVLF   | 9  | 0.0089  | ARHGEF26  | ENSG00000114790.13 | ENSP00000424446.1 | 2.3  | 2373 |
| RYPGKFYRV   | 9  | 0.0511  | MAP3K20   | ENSG00000091436.17 | ENSP00000364361.3 | 8.2  | 2400 |
| KYTHFIQSF   | 9  | 0.0021  | GBGT1     | ENSG00000148288.13 | ENSP00000361110.3 | 5.0  | 1041 |
| ETISQHIAKR  | 10 | 41.5000 | GBGT1     | ENSG00000148288.13 | ENSP00000361110.3 | 5.0  | 1041 |
| KYVTVYNLI   | 9  | 0.0238  | USP8      | ENSG00000138592.14 | ENSP00000379721.3 | 23.8 | 3354 |
| KYLADLPTL   | 9  | 0.0317  | CEP85L    | ENSG00000111860.14 | ENSP00000357477.3 | 1.5  | 2415 |
| SYMESVTF    | 9  | 0.0008  | BCAS3     | ENSG00000141376.22 | ENSP00000466078.1 | 21.4 | 2784 |
| EYMAQHUVF   | 9  | 0.0233  | STRIP1    | ENSG00000143093.15 | ENSP00000358811.1 | 20.4 | 2226 |
| VWSDVTPLEF  | 10 | 0.0205  | MMP11     | ENSG00000099953.10 | ENSP00000215743.3 | 5.2  | 1464 |
| YFFEEKQPLQF | 11 | 0.1048  | CPNE6     | ENSG00000100884.9  | ENSP00000453352.1 | 16.4 | 678  |
| VYLDGIVRI   | 9  | 0.0109  | KIAA0895L | ENSG00000196123.13 | ENSP00000290881.7 | 18.7 | 1413 |
| SYIHVVFRL   | 9  | 0.0262  | DOCK7     | ENSG00000116641.17 | ENSP00000340742.5 | 12.6 | 6327 |
| RYLAINHAYF  | 10 | 0.0272  | PTGER4    | ENSG00000171522.6  | ENSP00000302846.3 | 15.9 | 1464 |
| KYVKVFDKF   | 9  | 0.0034  | ZNF107    | ENSG00000196247.11 | ENSP00000378789.1 | 2.0  | 2349 |

|             |    |         |          |                    |                   |      |       |
|-------------|----|---------|----------|--------------------|-------------------|------|-------|
| AYNPVTHQL   | 9  | 0.0042  | CDON     | ENSG00000064309.14 | ENSP00000436755.1 | 3.5  | 1950  |
| RYAAQLPAL   | 9  | 0.1300  | PELP1    | ENSG00000141456.15 | ENSP00000460300.2 | 13.0 | 3390  |
| DIIAKVTRR   | 9  | 26.2000 | ARHGAP27 | ENSG00000159314.11 | ENSP00000432762.1 | 19.9 | 2001  |
| TYFTSGETF   | 9  | 0.0060  | PCLO     | ENSG00000186472.20 | ENSP00000388393.2 | 4.8  | 14805 |
| RLPSETYFF   | 9  | 0.0783  | ZBED6    | ENSG00000257315.2  | ENSP00000447879.1 | 1.2  | 2937  |
| KYGDILHVI   | 9  | 0.0077  | DLG2     | ENSG00000150672.17 | ENSP00000381355.2 | 3.9  | 2610  |
| VYGWTQHKF   | 9  | 0.0024  | TMEM116  | ENSG00000198270.13 | ENSP00000347620.2 | 22.8 | 906   |
| RYGPVVSF    | 8  | 0.0385  | CYP20A1  | ENSG00000119004.15 | ENSP00000407860.2 | 10.7 | 1410  |
| LYEEINQVF   | 9  | 0.0325  | CYP20A1  | ENSG00000119004.15 | ENSP00000407860.2 | 10.7 | 1410  |
| RYGPVVSFW   | 9  | 0.0056  | CYP20A1  | ENSG00000119004.15 | ENSP00000407860.2 | 10.7 | 1410  |
| RYTRWINQL   | 9  | 0.0280  | B3GNTL1  | ENSG00000175711.8  | ENSP00000319979.3 | 3.5  | 1083  |
| KYGNFIDKL   | 9  | 0.0902  | GTPBP10  | ENSG00000105793.15 | ENSP00000222511.6 | 3.4  | 1161  |
| FYIHHPVHL   | 9  | 0.0158  | ALMS1    | ENSG00000116127.18 | ENSP00000479094.1 | 4.6  | 11577 |
| RYMPPAHRNF  | 10 | 0.0021  | IDO1     | ENSG00000131203.13 | ENSP00000430950.1 | 1.8  | 1209  |
| VYSLVTRTW   | 9  | 0.0205  | TRPM4    | ENSG00000130529.16 | ENSP00000407492.1 | 28.2 | 3207  |
| IYDTSTDRLW  | 11 | 0.2313  | ISG20    | ENSG00000172183.15 | ENSP00000453638.1 | 2.7  | 543   |
| VYLDHAGATLF | 11 | 0.0119  | MOCOS    | ENSG00000075643.6  | ENSP00000261326.4 | 1.2  | 2664  |
| LYRLQFNEF   | 9  | 0.1323  | ARL4A    | ENSG00000122644.13 | ENSP00000385236.1 | 2.8  | 600   |
| SYSQSSNLF   | 9  | 0.0098  | ZNF24    | ENSG00000172466.16 | ENSP00000382015.2 | 3.6  | 1104  |
| GYKAIHEYL   | 9  | 0.2256  | SYNE1    | ENSG00000131018.23 | ENSP00000356224.5 | 53.8 | 26391 |
| MYLDAVHEF   | 9  | 0.0010  | SYNE1    | ENSG00000131018.23 | ENSP00000356224.5 | 53.8 | 26391 |
| DYTSRFSEF   | 9  | 0.1275  | SYNE1    | ENSG00000131018.23 | ENSP00000356224.5 | 53.8 | 26391 |
| SYLDRTEQL   | 9  | 0.0233  | WDR18    | ENSG00000065268.10 | ENSP00000476117.2 | 57.8 | 1296  |
| RYTPTTTQL   | 9  | 0.0126  | UNC5D    | ENSG00000156687.11 | ENSP00000385143.2 | 1.7  | 2859  |
| KYLTVKDYL   | 9  | 0.0991  | ATAD2    | ENSG00000156802.13 | ENSP00000287394.5 | 1.6  | 4170  |
| VYVPHIHVW   | 9  | 0.0021  | ATAD2    | ENSG00000156802.13 | ENSP00000287394.5 | 1.6  | 4170  |
| AYAIKEEL    | 9  | 0.1534  | ATAD2    | ENSG00000156802.13 | ENSP00000287394.5 | 1.6  | 4170  |

|             |    |         |            |                    |                   |      |      |
|-------------|----|---------|------------|--------------------|-------------------|------|------|
| KYVKVFHKL   | 9  | 0.0035  | ZNF493     | ENSG00000196268.11 | ENSP00000376110.2 | 4.5  | 2322 |
| NYTLVSHLI   | 9  | 0.0455  | MARS       | ENSG00000166986.15 | ENSP00000262027.5 | 44.9 | 2700 |
| RWMDQRLVF   | 9  | 0.0754  | GABRP      | ENSG00000094755.17 | ENSP00000265294.4 | 2.0  | 1320 |
| KYIKEAVRL   | 9  | 0.0236  | FRMD6      | ENSG00000139926.15 | ENSP00000379068.2 | 5.3  | 1842 |
| VYMELSQKL   | 9  | 0.0043  | FRMD6      | ENSG00000139926.15 | ENSP00000379068.2 | 5.3  | 1842 |
| LYQKDFLRI   | 9  | 0.0559  | FRMD6      | ENSG00000139926.15 | ENSP00000379068.2 | 5.3  | 1842 |
| RAARYYYYW   | 9  | 1.0602  | FRMD6      | ENSG00000139926.15 | ENSP00000379068.2 | 5.3  | 1842 |
| RYMSHKLKI   | 9  | 0.0478  | GBP3       | ENSG00000117226.12 | ENSP00000359512.4 | 20.4 | 1785 |
| FYSRLLQKF   | 9  | 0.0046  | ZWILCH     | ENSG00000174442.12 | ENSP00000311429.5 | 2.6  | 1773 |
| PFIKSQHELLF | 11 | 0.3613  | ZWILCH     | ENSG00000174442.12 | ENSP00000311429.5 | 2.6  | 1773 |
| VYQKIHNKEF  | 10 | 0.0195  | ZNF529     | ENSG00000186020.13 | ENSP00000334695.7 | 3.0  | 1374 |
| SYIQLRVQI   | 9  | 0.0142  | SAMHD1     | ENSG00000101347.9  | ENSP00000494979.1 | 7.2  | 381  |
| SYLTQHQR    | 9  | 0.0377  | AC092835.1 | ENSG00000233757.6  | ENSP00000478941.1 | 1.3  | 1566 |
| VYPERTPLL   | 9  | 0.0092  | AL669918.1 | ENSG00000250264.1  | ENSP00000391806.2 | 0.8  | 2529 |
| KYLLTPVNF   | 9  | 0.0028  | DCLRE1B    | ENSG00000118655.7  | ENSP00000498042.1 | 2.0  | 1596 |
| GYFGNPQKF   | 9  | 0.0074  | LAMA3      | ENSG00000053747.16 | ENSP00000324532.8 | 2.1  | 9999 |
| IYKGIPLQL   | 9  | 0.0139  | USP6NL     | ENSG00000148429.14 | ENSP00000476462.1 | 3.1  | 2484 |
| EIYHGSTKR   | 9  | 22.0000 | DNAJB5     | ENSG00000137094.14 | ENSP00000312517.5 | 2.7  | 1044 |
| VYSDYLQTI   | 9  | 0.0057  | PCED1B     | ENSG00000179715.13 | ENSP00000448000.1 | 1.9  | 501  |
| KWFDNSNMTF  | 10 | 0.0348  | CD302      | ENSG00000241399.7  | ENSP00000451446.2 | 7.9  | 585  |
| SFITHSLKF   | 9  | 0.0430  | CEP192     | ENSG00000101639.18 | ENSP00000427550.1 | 5.5  | 7611 |
| HYINMPVQF   | 9  | 0.0032  | CEP192     | ENSG00000101639.18 | ENSP00000427550.1 | 5.5  | 7611 |
| SYLKSANSW   | 9  | 0.0214  | KIAA0513   | ENSG00000135709.12 | ENSP00000446439.1 | 1.4  | 1203 |
| IYPPKLHQF   | 9  | 0.0012  | CCNE1      | ENSG00000105173.14 | ENSP00000262643.3 | 1.6  | 1230 |
| VFKEKHHSW   | 9  | 0.1530  | RNASEH2B   | ENSG00000136104.20 | ENSP00000494019.1 | 7.7  | 687  |
| TYSKHFRI    | 9  | 0.0510  | CHEK2      | ENSG00000183765.22 | ENSP00000384835.1 | 3.5  | 1542 |
| VYTSKLVRL   | 9  | 0.0291  | PLXNA4     | ENSG00000221866.9  | ENSP00000323194.4 | 0.8  | 5682 |

|            |    |         |          |                    |                   |      |       |
|------------|----|---------|----------|--------------------|-------------------|------|-------|
| RYVDRVTEF  | 9  | 0.0042  | CDK5RAP3 | ENSG00000108465.15 | ENSP00000464286.1 | 19.1 | 816   |
| RYTSQFIRL  | 9  | 0.0233  | DCAF17   | ENSG00000115827.14 | ENSP00000400335.1 | 7.4  | 384   |
| YYEHVKARF  | 9  | 0.0315  | MLPH     | ENSG00000115648.14 | ENSP00000386780.1 | 4.6  | 1440  |
| DIIEKVMAR  | 9  | 19.8065 | TSC2     | ENSG00000103197.18 | ENSP00000494514.1 | 58.4 | 5289  |
| IYPSKWIARL | 10 | 0.1874  | TSC2     | ENSG00000103197.18 | ENSP00000494514.1 | 58.4 | 5289  |
| KYMKIFHKF  | 9  | 0.0004  | ZNF681   | ENSG00000196172.9  | ENSP00000384000.3 | 0.7  | 1935  |
| VYGPVFTL   | 8  | 0.1231  | CYP2C9   | ENSG00000138109.11 | ENSP00000260682.6 | 1.4  | 1470  |
| KYVKVMHKF  | 9  | 0.0016  | ZNF138   | ENSG00000197008.9  | ENSP00000399528.1 | 5.8  | 861   |
| YSHVIQKL   | 8  | 1.0537  | SDS      | ENSG00000135094.11 | ENSP00000257549.4 | 0.6  | 984   |
| VYSHVIQKL  | 9  | 0.0033  | SDS      | ENSG00000135094.11 | ENSP00000257549.4 | 0.6  | 984   |
| EYKDFEKF   | 9  | 0.1576  | NEB      | ENSG00000183091.19 | ENSP00000484342.1 | 5.5  | 25680 |
| EYKKEFEKF  | 9  | 0.1379  | NEB      | ENSG00000183091.19 | ENSP00000484342.1 | 5.5  | 25680 |
| RYLTVATVF  | 9  | 0.0105  | TUBB3    | ENSG00000258947.7  | ENSP00000320295.7 | 1.1  | 1350  |
| DVAQEHLKER | 10 | 53.7500 | GLI2     | ENSG00000074047.21 | ENSP00000390436.1 | 1.1  | 4758  |
| EVFTGGIGSY | 10 | 15.8116 | TENT4B   | ENSG00000121274.12 | ENSP00000350054.4 | 9.2  | 909   |
| HGVILPRV   | 8  | 31.6667 | MTMR10   | ENSG00000166912.17 | ENSP00000402537.1 | 31.4 | 2331  |
| NYAQVLDKF  | 9  | 0.0094  | ASAP1    | ENSG00000153317.15 | ENSP00000429900.1 | 9.9  | 3387  |
| SYGTVSQIF  | 9  | 0.0060  | CLEC5A   | ENSG00000258227.7  | ENSP00000449999.1 | 0.5  | 564   |
| TFESKSYKM  | 9  | 1.1172  | FGA      | ENSG00000171560.16 | ENSP00000385981.3 | 0.4  | 1932  |
| FLAEGGGVR  | 9  | 36.3333 | FGA      | ENSG00000171560.16 | ENSP00000385981.3 | 0.4  | 1932  |
| KYVKDFHKF  | 9  | 0.0014  | ZNF724   | ENSG00000196081.9  | ENSP00000413411.1 | 0.5  | 1857  |
| QYIDKLNEL  | 9  | 0.0257  | CCDC88A  | ENSG00000115355.16 | ENSP00000405080.1 | 4.3  | 3606  |
| KYLQSTISF  | 9  | 0.0031  | TOP3B    | ENSG00000100038.19 | ENSP00000349705.5 | 12.9 | 2586  |
| KYGVVIASF  | 9  | 0.0050  | DOCK4    | ENSG00000128512.22 | ENSP00000404179.1 | 10.3 | 5898  |
| SYQKVIELF  | 9  | 0.0009  | PBK      | ENSG00000168078.10 | ENSP00000301905.4 | 0.3  | 966   |
| EYNTIKDKF  | 9  | 0.0842  | PARP15   | ENSG00000173200.13 | ENSP00000419488.1 | 0.6  | 1125  |
| EYQKVWNLF  | 9  | 0.0077  | PARP12   | ENSG00000059378.12 | ENSP00000263549.3 | 16.7 | 2103  |

|             |    |         |          |                     |                    |      |       |
|-------------|----|---------|----------|---------------------|--------------------|------|-------|
| KHNYELDFKAF | 11 | 1.3328  | PARP12   | ENSG00000059378.12  | ENSP000000263549.3 | 16.7 | 2103  |
| KFSEPLYTF   | 9  | 0.0038  | FAT2     | ENSG00000086570.12  | ENSP000000261800.5 | 0.3  | 13047 |
| IYRFITERF   | 9  | 0.0202  | FOXE3    | ENSG000000186790.6  | ENSP000000334472.2 | 0.3  | 957   |
| TYLRKIPRF   | 9  | 0.0044  | CCDC14   | ENSG000000175455.15 | ENSP000000386866.4 | 8.3  | 2715  |
| YADPSILYI   | 9  | 2.2250  | HDAC9    | ENSG00000048052.21  | ENSP000000384657.3 | 4.0  | 3198  |
| VAVAGVVLAKG | 11 | 90.0000 | SLC10A6  | ENSG000000145283.7  | ENSP000000273905.6 | 0.2  | 1131  |
| LYRDIFQHL   | 9  | 0.0486  | NFE2     | ENSG000000123405.14 | ENSP000000447558.1 | 0.3  | 1119  |
| EAQVERAM    | 8  | 45.5000 | KIF18B   | ENSG000000186185.13 | ENSP000000465377.1 | 0.2  | 2499  |
| TYPEGLEVLHF | 11 | 0.0123  | CENPJ    | ENSG000000151849.15 | ENSP000000371308.4 | 2.5  | 4014  |
| KYGFYTHVF   | 9  | 0.0058  | F2       | ENSG000000180210.14 | ENSP000000308541.5 | 0.2  | 1866  |
| ESLLLLPR    | 8  | 65.0000 | DIPK2A   | ENSG000000181744.8  | ENSP000000419947.2 | 5.1  | 639   |
| SYLESLVKF   | 9  | 0.0018  | HSD17B13 | ENSG000000170509.12 | ENSP000000333300.4 | 0.1  | 900   |
| AVADMLRENRS | 11 | 70.0000 | TMOD4    | ENSG000000163157.15 | ENSP000000295314.4 | 0.2  | 1035  |
| QQYRALSV    | 8  | 22.7895 | TUBB1    | ENSG000000101162.3  | ENSP000000217133.1 | 0.1  | 1353  |

%rank, %rank score of NetMHCpan4.1; Expression, gene expression calculated using RNA-seq data; ORF length, nucleotide lengths of the open reading frame encoding the peptide
